# Supplementary material for: Access to 5-bromopentanal and 6-bromohexanal derivatives via the bromination/hydrolysis of C,O-bis-zirconocenes generated from unsaturated Weinreb amides
Source: Royal Society of Chemistry journal article supplement (doi:10.1039/d2ob01073a), 2022-01-01

**Access to 5-bromopentanal and 6-bromohexanal derivatives via bromination  
/ hydrolysis of C,O-bis-zirconocenes generated from unsaturated Weinreb  
amides.**

Aurélien Coelho, Jean-Bernard Behr, Jean-Luc Vasse.

Institut de Chimie Moléculaire de Reims, CNRS-UMR 7312 and Université de Reims, 51687 Reims  
Cedex 2, France

**Electronic Supplementary Information**

**S2-S15** Experimental procedures and characterization of compounds 1-13.

**S16-S17** HPLC chromatogram of compound 5a, 5k

**S18-S152**  $^1\text{H}$  and  $^{13}\text{C}$  NMR copy of new compounds

## Experimental procedures and characterization of compounds.

All reactions involving organometallics were conducted under an atmosphere of argon.  $^1\text{H}$  and  $^{13}\text{C}$  NMR spectra were recorded in  $\text{CDCl}_3$ , unless specified, on a Bruker AC-500. Samples were analyzed by Q-TOF HRMS system. The analysis was performed on a Waters SYNAPT G2-Si High Resolution Mass Spectrometry equipped with electrospray ionization (ESI) source (Waters Corp., Manchester, UK). Mass detection was conducted in positive ion mode, with the source temperature at  $120^\circ\text{C}$ , capillary voltage and cone voltage were set at 3 KV and 40 V. The desolvation gas was optimized to 900 L/h, the cone gas flow of 50 L/h and the scan range was from 50 to 2000  $m/z$ . Samples were analyzed in infusion mode and the mass was corrected during acquisition using external reference (Lock-Spray) consisting of a 1 ng/ $\mu\text{L}$  solution of leucine enkephalin at a flow rate of 5  $\mu\text{L}/\text{min}$ , in order to make sure the accuracy and reproducibility during the MS analysis. All data collected were acquired using MassLynx<sup>TM</sup> (V4.1) software in centroid mode.

## Experimental procedures and characterization of compounds

### **Tert-Butyl 3-(ferrocenyl)hex-5-enoate S1**

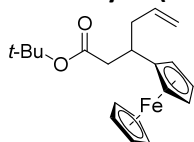

To a solution of (*E*)-Tert-butyl 3-(ferrocenyl)acrylate (0.95 g, 2.97 mmol) in DMF (7 mL) was added TMAF (0.36 g, 3.86 mmol) and allyltrimethylsilane (0.89 mL, 5.94 mmol) at  $0^\circ\text{C}$ . The mixture was stirred for 2 h at  $0^\circ\text{C}$ , then a saturated aqueous solution of water (5 mL) was added. The aqueous layer was extracted with AcOEt (3 x 8 mL), the organic phases were combined, dried over  $\text{MgSO}_4$ , filtered and concentrated under reduced pressure. The residue was purified by column chromatography on silica gel eluting with  $\text{CH}_2\text{Cl}_2$  to give **S1** as a red oil (835 mg, 2.36 mmol, 80%).  $^1\text{H}$  NMR (500 MHz, DMSO)  $\delta$  5.73 (ddt,  $J = 16.2, 11.3, 7.2$  Hz, 1 H), 5.07-4.92 (m, 2 H), 4.14 (s, 5 H), 4.13-4.06 (m, 2 H), 4.09-4.02 (m, 2 H), 2.87 (tt,  $J = 7.8, 5.4$  Hz, 1 H), 2.47 (d,  $J = 5.6$  Hz, 1 H), 2.39 (dd,  $J = 15.1, 8.0$  Hz, 1 H), 2.36-2.33 (m, 1 H), 2.21 (dt,  $J = 14.1, 7.5$  Hz, 1 H), 1.40 (s, 9 H);  $^{13}\text{C}$  NMR (126 MHz, DMSO)  $\delta$  171.5, 136.3, 116.7, 92.5, 79.6, 68.2, 66.8, 66.8, 66.7, 66.4, 40.4, 39.0, 34.6, 27.7; HRMS-ESI  $m/z$   $[\text{M}]^+$  calcd for  $\text{C}_{20}\text{H}_{26}\text{O}_2\text{Fe}$ : 354.1282; found: 354.1281.

### **Tert-Butyl 3-(2-bromophenyl)hex-5-enoate S2**

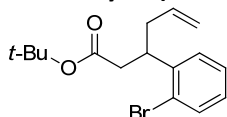

Prepared according to the above procedure from Tert-butyl (*E*)-3-(2-bromophenyl)acrylate (2.80 g, 10 mmol) as a red oil (430 mg, 1.32 mmol, 13%).  $^1\text{H}$  NMR (500 MHz,  $\text{CDCl}_3$ )  $\delta$  7.52 (dd,  $J = 8.0, 1.2$  Hz, 1 H), 7.23 (dd,  $J = 7.6, 2.1$  Hz, 1 H), 7.19 (td,  $J = 7.3, 1.2$  Hz, 1 H), 7.06 (td,  $J = 7.9, 2.0$  Hz, 1 H), 5.80 (ddt,  $J = 17.1, 10.1, 6.9$  Hz, 1 H), 5.10 (dq,  $J = 17.1, 1.6$  Hz, 1 H), 5.05 (ddt,  $J = 10.1, 2.0, 1.1$  Hz, 1 H), 2.97 (dd,  $J = 13.7, 9.3$  Hz, 1 H), 2.90 (dd,  $J = 13.7, 5.8$  Hz, 1 H), 2.80 (ddt,  $J = 9.1, 8.1, 5.8$  Hz, 1 H), 2.40 (dddt,  $J = 14.1, 8.4, 7.1, 1.2$  Hz, 1 H), 2.27 (dddt,  $J = 13.9, 6.9, 5.6, 1.3$  Hz, 1 H), 1.33 (s, 9 H);  $^{13}\text{C}$  NMR (126 MHz,  $\text{CDCl}_3$ )  $\delta$  174.0, 139.0, 135.3, 132.9, 131.5, 128.1, 127.2, 124.8, 117.1, 80.5, 45.9, 38.2, 36.8, 28.1; MS-Cl  $m/z$  : 325  $[\text{M}+\text{H}]^+$  (38%).

### (E)-3-[3-(Naphthalen-1-yl)acryloyl]oxazolidin-2-one **S3**

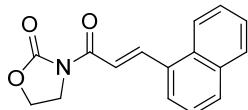

To a solution of **oxazolidin-2-one** (0.78 g, 9 mmol) in THF (40 mL) was added a solution of n-BuLi (2.4 M in hexane, 3.75 mL, 9 mmol) at  $-78^{\circ}\text{C}$ . After 15 min of stirring, **(E)-3-(naphthalen-1-yl)acryloyl chloride** (2.04 g, 9.42 mmol) was added. The reaction mixture was stirred 30 min at  $-78^{\circ}\text{C}$ , then 2 h at rt. A saturated aqueous solution of  $\text{NH}_4\text{Cl}$  (10 mL) was added. The aqueous layer was extracted with AcOEt (3 x 20 mL), the organic phases were combined, dried over  $\text{Na}_2\text{SO}_4$ , filtered and concentrated under reduced pressure. The residue was purified by column chromatography on silica gel eluting with DCM to give **S3** (1.37 g, 5.12 mmol, 57%) as a white solid.  $^1\text{H}$  NMR (500 MHz,  $\text{CDCl}_3$ )  $\delta$  8.75 (d,  $J = 15.5$  Hz, 1 H), 8.27 (d,  $J = 8.4$  Hz, 1 H), 8.03 (d,  $J = 15.5$  Hz, 1 H), 7.94 (d,  $J = 7.7$  Hz, 2 H), 7.92-7.89 (m, 1 H), 7.65-7.42 (m, 3 H), 4.51 (dd,  $J = 8.5, 7.6$  Hz, 2 H), 4.21 (dd,  $J = 8.6, 7.5$  Hz, 2 H);  $^{13}\text{C}$  NMR (126 MHz,  $\text{CDCl}_3$ )  $\delta$  165.5, 153.7, 143.1, 131.1, 128.9, 127.1, 126.3, 125.8, 125.6, 123.4, 119.1, 62.2, 43.0; HRMS-ESI  $m/z$   $[\text{M}+\text{H}]^+$  calcd for  $\text{C}_{16}\text{H}_{14}\text{NO}_3$ : 268.0974 found: 268.0970.

### 3-[(2E,6E)-4,4-dimethyl-7-phenylhepta-2,6-dienoyl]oxazolidin-2-one **S4**

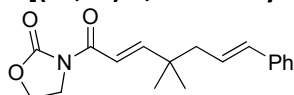

Prepared according to the above procedure from **oxazolidin-2-one** (0.50 g, 9.00 mmol) and isolated as a colorless oil (1.33 g, 4.87 mmol, 85%)  $R_f$  0.8,  $\text{CH}_2\text{Cl}_2$ .  $^1\text{H}$  NMR (500 MHz,  $\text{CDCl}_3$ )  $\delta$  7.40-7.15 (m, 7 H), 6.40 (d,  $J = 15.7$  Hz, 1 H), 6.14 (dt,  $J = 15.5, 7.5$  Hz, 1 H), 4.40 (dd,  $J = 8.5, 7.5$  Hz, 2 H), 4.06 (dd,  $J = 8.6, 7.5$  Hz, 2 H), 2.31 (dd,  $J = 7.6, 1.4$  Hz, 2 H), 1.15 (s, 6 H);  $^{13}\text{C}$  NMR (126 MHz,  $\text{CDCl}_3$ )  $\delta$  165.7, 159.8, 153.6, 137.5, 133.1, 128.5, 127.2, 126.2, 126.1, 117.0, 62.1, 45.6, 42.8, 38.0, 26.4; HRMS-ESI  $m/z$   $[\text{M}+\text{H}]^+$  calcd for  $\text{C}_{18}\text{H}_{22}\text{NO}_3$ : 300.1600 found: 300.1601.

### (R,E)-4-Benzyl-3-[3-(thiophen-2-yl)acryloyl]oxazolidin-2-one **S5**

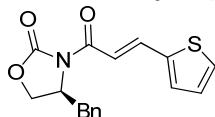

To a solution of **(R)-4-benzylloxazolidin-2-one** (1.39 g, 7.85 mmol) in THF (40 mL) was added a solution of n-BuLi (2.4 M in hexane, 3.27 mL, 7.85 mmol) at  $-78^{\circ}\text{C}$ . After 15 min of stirring, **(E)-3-(thiophen-2-yl)acryloyl chloride** (1.62 g, 9.42 mmol) was added. The reaction mixture was stirred 30 min at  $-78^{\circ}\text{C}$  2h at rt then, a saturated aqueous solution of  $\text{NH}_4\text{Cl}$  (10 mL) was added. The aqueous layer was extracted with AcOEt (3 x 20 mL), the organic phases were combined, dried over  $\text{Na}_2\text{SO}_4$ , filtered and concentrated under reduced pressure. The residue was purified by column chromatography on silica gel eluting with  $\text{CH}_2\text{Cl}_2$  to give **S5** (2.02 g, 6.45 mmol, 82%) as a colorless oil;  $[\alpha]_D^{+72}$  (c 1.02,  $\text{CH}_2\text{Cl}_2$ );  $^1\text{H}$  NMR (500 MHz,  $\text{CDCl}_3$ )  $\delta$  8.02 (d,  $J = 15.4$  Hz, 1 H), 7.72 (d,  $J = 15.4$  Hz, 1 H), 7.44 (d,  $J = 5.0$  Hz, 1 H), 7.39-7.32 (m, 3 H), 7.32-7.23 (m, 3 H), 7.08 (dd,  $J = 5.0, 3.6$  Hz, 1 H), 4.79 (ddt,  $J = 9.4, 7.6, 3.2$  Hz, 1 H), 4.24 (dd,  $J = 9.0, 7.7$  Hz, 1 H), 4.20 (dd,  $J = 9.0, 2.9$  Hz, 1 H), 3.37 (dd,  $J = 13.4, 3.3$  Hz, 1 H), 2.84 (dd,  $J = 13.4, 9.5$  Hz, 1 H);  $^{13}\text{C}$  NMR (126 MHz,  $\text{CDCl}_3$ )  $\delta$  165.1, 153.6, 140.1, 138.8, 135.4, 131.9, 129.6, 129.5, 129.1, 128.3, 127.4, 115.7, 66.2, 55.5, 38.0. HRMS-ESI  $m/z$   $[\text{M}+\text{H}]^+$  calcd for  $\text{C}_{17}\text{H}_{16}\text{NO}_3\text{S}$ : 314.0851; found: 314.0853.

**(S)-4-Benzyl-3-[(S)-3-phenylhex-5-enoyl]oxazolidin-2-one S6<sup>1</sup>****Procedure A<sup>2</sup>**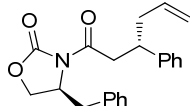

To a suspension of  $\text{CuBr}\cdot\text{SMe}_2$  (1.59 g, 7.75 mmol) in THF (50 mL) was added a solution of allylmagnesium bromide (1 M in  $\text{Et}_2\text{O}$ , 15.5 mL, 15.5 mmol) at  $-50^\circ\text{C}$ . The mixture was stirred for 30 min, then cooled down to  $-78^\circ\text{C}$ . A solution of **(S)-4-Benzyl-3-cinnamoyloxazolidin-2-one**<sup>3</sup> (1.70 g, 5.54 mmol) in THF (20 mL) was added at  $-78^\circ\text{C}$ . The resulting mixture was stirred for 3 h at  $-78^\circ\text{C}$ , then a saturated aqueous solution of  $\text{NH}_4\text{Cl}$  (10 mL) was added. The aqueous layer was extracted with  $\text{AcOEt}$  (3 x 20 mL), the organic phases were combined, dried over  $\text{Na}_2\text{SO}_4$ , filtered and concentrated under reduced pressure. The residue was purified by column chromatography on silica gel eluting with  $\text{CH}_2\text{Cl}_2$  to give **S4a** (1.58 g, 5.35 mmol, 96%) as a colorless oil.  $[\alpha]_D^{25} + 65^\circ$  (c 1,  $\text{CHCl}_3$ );  $^1\text{H NMR}$  (500 MHz,  $\text{CDCl}_3$ )  $\delta$  7.35-7.11 (m, 10 H), 5.71 (ddt,  $J = 17.1, 10.1, 7.0$  Hz, 1 H), 5.05 (dq,  $J = 17.1, 1.7$  Hz, 1 H), 5.00 (dd,  $J = 10.2, 1.8$  Hz, 1 H), 4.49 (ddt,  $J = 10.3, 7.7, 3.0$  Hz, 1 H), 4.07 (dd,  $J = 9.0, 2.5$  Hz, 1 H), 3.99 (t,  $J = 8.4$  Hz, 1 H), 3.53-3.30 (m, 2 H), 3.24 (dd,  $J = 15.0, 4.0$  Hz, 1 H), 3.19 (dd,  $J = 10.0, 3.4$  Hz, 1 H), 2.65 (dd,  $J = 13.4, 9.9$  Hz, 1 H), 2.52-2.42 (m, 2 H);  $^{13}\text{C NMR}$  (126 MHz,  $\text{CDCl}_3$ )  $\delta$  172.0, 153.6, 143.7, 136.2, 135.4, 129.5, 129.0, 128.5, 127.8, 127.4, 126.7, 117.1, 66.2, 55.3, 41.56, 41.20, 41.09, 37.9.

**3-[3-(Naphthalen-1-yl)hex-5-enoyl]oxazolidin-2-one S7**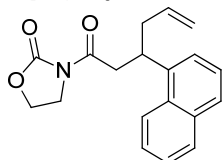

Prepared according to **procedure A** from **S3** (1.37 g, 5.12 mmol) and isolated as a colorless oil (0.65 g, 1.53 mmol, 51%).  $^1\text{H NMR}$  (500 MHz,  $\text{CDCl}_3$ )  $\delta$  8.22 (d,  $J = 8.5$  Hz, 1 H), 7.85 (dd,  $J = 8.1, 1.4$  Hz, 1 H), 7.72 (dd,  $J = 6.9, 2.5$  Hz, 1 H), 7.54 (ddd,  $J = 8.5, 6.8, 1.5$  Hz, 1 H), 7.50-7.38 (m, 3 H), 5.73 (dddd,  $J = 16.7, 10.2, 7.7, 6.3$  Hz, 1 H), 5.06 (dd,  $J = 17.1, 1.7$  Hz, 1 H), 4.97 (ddt,  $J = 10.2, 2.1, 1.1$  Hz, 1 H), 4.37-4.20 (m, 3 H), 3.89-3.76 (m, 2 H), 3.50 (dd,  $J = 17.0, 7.6$  Hz, 1 H), 3.44 (dd,  $J = 16.9, 6.7$  Hz, 1 H), 2.62 (dt,  $J = 13.3, 6.5$  Hz, 1 H), 2.54 (dt,  $J = 14.3, 7.5$  Hz, 1 H);  $^{13}\text{C NMR}$  (126 MHz,  $\text{CDCl}_3$ )  $\delta$  172.5, 153.9, 140.2, 136.4, 134.3, 132.0, 129.3, 127.3, 126.3, 125.8, 123.5, 117.3, 62.3, 42.8, 40.9, 40.7, 39.9 (br s); HRMS-ESI  $m/z$   $[\text{M}+\text{H}]^+$  calcd for  $\text{C}_{19}\text{H}_{20}\text{NO}_3$ : 310.1438 found: 310.1442.

**(E)-3-(3-Allyl-4,4-dimethyl-7-phenylhept-6-enoyl)oxazolidin-2-one S8**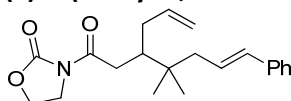

Prepared according to **procedure A** from **S4** (1.33 g, 4.67 mmol) and isolated as a colorless oil (0.62 g, 1.82 mmol, 39%).  $^1\text{H NMR}$  (500 MHz,  $\text{CDCl}_3$ )  $\delta$  7.39-7.33 (m, 2 H), 7.30 (dd,  $J = 8.5, 6.9$  Hz, 2 H), 7.23-7.13 (m, 1 H), 6.38 (d,  $J = 15.7$  Hz, 1 H), 6.26 (dt,  $J = 15.5, 7.4$  Hz, 1 H), 5.79-5.66 (m, 1 H), 5.05-4.97 (m, 2 H), 4.93 (dt,  $J = 10.0, 1.9$  Hz, 1 H), 4.36 (d,  $J = 8.1, 4.1$  Hz, 1 H), 4.34 (dd,  $J = 8.2, 4.0$  Hz, 1 H), 3.95 (t,  $J = 8.1$  Hz, 2 H), 3.06 (dd,  $J = 17.4, 4.5$  Hz, 1 H), 2.86 (dd,  $J = 17.4, 7.2$  Hz, 1 H), 2.44 (dddd,  $J = 14.0, 5.0, 3.0, 1.7$  Hz, 1 H), 2.25 (dddd,  $J = 10.4, 7.5, 4.5, 3.2$  Hz, 1 H), 2.19 (dd,  $J = 7.4, 1.2$  Hz, 2 H), 1.88 (dt,  $J = 14.0, 9.8$  Hz, 1 H), 0.94 (s, 6 H);  $^{13}\text{C NMR}$  (126 MHz,  $\text{CDCl}_3$ )  $\delta$  173.8, 153.7, 138.5, 137.8, 132.5, 128.6, 127.2, 127.0, 126.1, 115.9, 61.9, 44.14, 42.9, 41.6, 37.0, 35.4, 35.2, 24.9, 24.9; HRMS-ESI  $m/z$   $[\text{M}+\text{H}]^+$  calcd for  $\text{C}_{21}\text{H}_{28}\text{NO}_3$ : 342.2069 found: 342.2072.

<sup>1</sup> A. B. Smith III, L.-D. Cantin, A. Pasternak, L. Guise-Zawacki, W. Yao, A. K. Charnley, J. Barbosa, P. A. Sprengeler, R. Hirschmann, S. Munshi, D. B. Olsen, W. A. Schleif and L. C. Kuo, *J. Med. Chem.*, 2003, **46**, 1831.

<sup>2</sup> D.-G. Liu, Y. Gao, X. Wang, J. A. Kelley, and T. R. Burke, Jr, *J. Org. Chem.*, 2002, **67**, 1448.

<sup>3</sup> M. Neisius and B. Plietker, *J. Org. Chem.*, 2008, **73**, 3218.

### (S)-4-Benzyl-3-[(S)-3-(thiophen-2-yl)hex-5-enoyl]oxazolidin-2-one S9

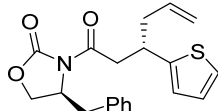

Prepared according to **procedure A** from **S5** (1.14 g, 3.51 mmol) and isolated as a colorless oil (0.99 g, 2.8 mmol, 80%).  $[\alpha]_D^{25}$  72° (c 1.02, CH<sub>2</sub>Cl<sub>2</sub>); <sup>1</sup>H NMR (500 MHz, CDCl<sub>3</sub>) δ 7.36-7.26 (m, 3 H), 7.21-7.16 (m, 2 H), 7.14 (dd, *J* = 5.1, 1.2 Hz, 1 H), 6.92 (dd, *J* = 5.1, 3.4 Hz, 1 H), 6.89 (d, *J* = 3.1 Hz, 1 H), 5.77 (ddt, *J* = 17.1, 10.2, 7.0 Hz, 1 H), 5.09 (dq, *J* = 17.3, 1.8 Hz, 1 H), 5.08-5.02 (m, 1 H), 4.58 (ddt, *J* = 10.3, 6.9, 3.3 Hz, 1 H), 4.15-4.06 (m, 2 H), 3.76-3.68 (m, 1 H), 3.38 (dd, *J* = 16.9, 8.8 Hz, 1 H), 3.28 (dd, *J* = 16.9, 5.2 Hz, 1 H), 2.69 (dd, *J* = 13.4, 9.9 Hz, 1 H), 2.58-2.43 (m, 3 H); <sup>13</sup>C NMR (126 MHz, CDCl<sub>3</sub>) δ 171.5, 153.5, 147.5, 135.7, 135.4, 129.5, 129.1, 127.4, 126.7, 124.2, 123.3, 117.6, 66.3, 55.3, 42.2, 41.8, 37.9, 36.6; HRMS-ESI *m/z* [M+H]<sup>+</sup> calcd for C<sub>20</sub>H<sub>22</sub>NO<sub>3</sub>S: 356.1320; found: 356.1318.

### (S)-4-Benzyl-3-[(R)-3-[2-(benzyloxy)ethyl]hex-5-enoyl]oxazolidin-2-one S10

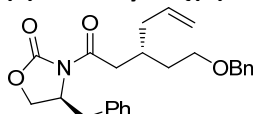

Prepared according to **procedure A** from (*S,E*)-4-benzyl-3-[5-(benzyloxy)pent-2-enoyl]oxazolidin-2-one<sup>4</sup> (0.51 g, 1.41 mmol) and isolated as a colorless oil (0.30 g, 0.73 mmol, 50%). <sup>1</sup>H NMR (500 MHz, CDCl<sub>3</sub>) δ 7.36-7.11 (m, 10 H), 5.80 (ddt, *J* = 17.3, 10.4, 7.2 Hz, 1 H), 5.14-5.00 (m, 2 H), 4.61-4.53 (m, 1 H), 4.50 (d, *J* = 11.9 Hz, 1 H), 4.46 (d, *J* = 12.0 Hz, 1 H), 4.06 (dd, *J* = 9.0, 2.6 Hz, 1 H), 3.95 (dd, *J* = 9.0, 7.9 Hz, 1 H), 3.56 (t, *J* = 6.4 Hz, 2 H), 3.28 (dd, *J* = 13.4, 3.3 Hz, 1 H), 2.96 (d, *J* = 6.6 Hz, 2 H), 2.67 (dd, *J* = 13.4, 9.8 Hz, 1 H), 2.38-2.31 (m, 1 H), 2.22 (dt, *J* = 13.0, 6.5 Hz, 1 H), 2.13 (dt, *J* = 14.1, 7.2 Hz, 1 H), 1.78-1.65 (m, 2 H); <sup>13</sup>C NMR (126 MHz, CDCl<sub>3</sub>) <sup>13</sup>C δ 172.7, 153.5, 138.7, 136.4, 135.5, 129.5, 129.0, 128.4, 127.5, 127.4, 117.1, 72.9, 68.5, 66.1, 55.3, 39.6, 38.8, 38.0, 33.7, 31.5; HRMS-ESI *m/z* [M+H]<sup>+</sup> calcd for C<sub>25</sub>H<sub>30</sub>NO<sub>4</sub>: 408.2175; found: 408.2178.

### (S)-4-Benzyl-3-(3-phenylpropanoyl)oxazolidin-2-one S11<sup>5</sup>

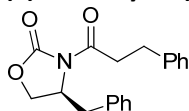

To a solution of (*S*)-4-benzylloxazolidin-2-one (0.75 g, 4.24 mmol) in THF (15 mL) was slowly added a solution of *n*-BuLi (2.5 M in THF, 1.7 mL, 4.24 mmol) at 0°C. The mixture was cooled down to -70°C then, a solution of 4-phenylbutanoyl chloride (0.77 g, 4.24 mmol) in THF (5 mL) was added dropwise. The stirring was continued for 1h at -70°C then warmed to rt prior to the addition of a saturated aqueous solution of NH<sub>4</sub>Cl (20 mL). The organic solution was washed with brine (20 mL), dried over NaSO<sub>4</sub>, filtered and concentrated under reduced pressure. The residue was purified by column chromatography on silica gel eluting with a mixture of PE/EA (80:20) to give **S11** (2.65 g, 8.97 mmol, 78%, 0.99 g, 3.2 mmol, 75%) as a colorless oil. *R*<sub>f</sub> 0.35 (PE/EA, 80:20);  $[\alpha]_D^{25}$  +98 (c 1.07, CHCl<sub>3</sub>); <sup>1</sup>H NMR (500 MHz, CDCl<sub>3</sub>) δ 7.43-7.13 (m, 10 H), 4.69 (ddt, *J* = 9.5, 6.9, 3.4 Hz, 1 H), 4.24-4.15 (m, 2 H), 3.39-3.22 (m, 3 H), 3.11-2.99 (m, 2H), 2.78 (dd, *J* = 13.4, 9.6 Hz, 1 H); <sup>13</sup>C NMR (126 MHz, CDCl<sub>3</sub>) δ 172.6, 153.6, 140.6, 135.3, 129.6, 129.1, 128.7, 128.6, 127.5, 126.4, 66.3, 55.3, 38.0, 37.3, 30.4.

<sup>4</sup> G. Pattenden, N. J. Ashweek, C. A. G. Baker-Glenn, J. Kempson, G. M. Walker and J. G. K. Yee, *Org. Biomol. Chem.*, 2008, **6**, 1478.

<sup>5</sup> M. K. Edmonds, F. H. M. Graichen, J. Gardiner and A. D. Abel, *Org. Lett.*, 2008, **10**, 885.

**(S)-4-Benzyl-3-[(S)-2-benzylpent-4-enoyl]oxazolidin-2-one S12<sup>6</sup>**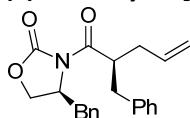

To a solution of **S11** (0.97 g, 3.14 mmol) in THF (20 mL) was slowly added a solution of NaHMDS (1 M in THF, 4.1 mL, 4.1 mmol) at -70°C. After 1 h of stirring at -70°C, allyl bromide (0.88 mL, 10 mmol) was added dropwise. The reaction mixture was stirred at -50°C for 3 h, prior to the addition of a saturated solution of NH<sub>4</sub>Cl (20 mL). The layers were separated and the aqueous phase was extracted with AcOEt (2 x 20 mL). The organic phases were combined, dried over MgSO<sub>4</sub>, filtered and concentrated under reduced pressure. The residue was purified by column chromatography on silica gel eluting with a mixture of PE/Et<sub>2</sub>O to give **S12** (0.77 g, 2.2 mmol, 70%) as a colorless oil. R<sub>f</sub> 0.50 (PE/EA, 80:20); [α]<sub>D</sub> +113 (c 1, CHCl<sub>3</sub>). <sup>1</sup>H NMR (500 MHz, CDCl<sub>3</sub>) δ 7.35-7.16 (m, 10 H), 5.86 (ddt, *J* = 17.1, 10.2, 6.9 Hz, 1 H), 5.13 (dq, *J* = 17.1, 1.6 Hz, 1 H), 5.08 (ddt, *J* = 10.2, 2.2, 1.1 Hz, 1 H), 4.50-4.41 (m, 1 H), 4.38-4.29 (m, 1 H), 4.01 (dd, *J* = 9.0, 2.3 Hz, 1 H), 3.23 (dd, *J* = 13.4, 3.4 Hz, 1 H), 2.96 (dd, *J* = 13.4, 8.9 Hz, 1 H), 2.85 (dd, *J* = 13.4, 6.5 Hz, 1 H), 2.65 (dd, *J* = 13.4, 9.9 Hz, 1 H), 2.56 (dt, *J* = 14.4, 7.8 Hz, 1 H), 2.36 (dt, *J* = 12.7, 5.6 Hz, 1 H); <sup>13</sup>C NMR (126 MHz, CDCl<sub>3</sub>) δ 175.4, 153.1, 139.0, 135.5, 135.1, 129.5, 129.2, 129.0, 128.4, 127.4, 126.5, 117.5, 65.9, 55.6, 44.0, 38.4, 38.1, 36.4.

**(S)-N-Methoxy-N-methyl-3-phenylhex-5-enamide 1aa<sup>7</sup>****Procedure B**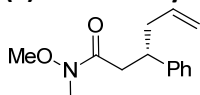

To a solution of MeNHOMe·HCl (503 mg, 5.16 mmol) in CH<sub>2</sub>Cl<sub>2</sub> (20 mL) was added a solution of AlMe<sub>3</sub> (2 M in heptane, 2.6 mL, 5.2 mmol) at 0°C. The mixture was stirred 30 min at 0°C then 30 min at rt and cooled down to 0°C. A solution of **(S)-4-benzyl-3-[(S)-3-phenylhex-5-enoyl]oxazolidin-2-one** (600 mg, 1.72 mmol) in CH<sub>2</sub>Cl<sub>2</sub> (15 mL) was added at 0°C, then the resulting mixture was stirred 20 min at 0°C and 1 h at rt. A solution of Rochelle salt (10%, 20 mL) was added. After 30 min of stirring, the aqueous layer was extracted with CH<sub>2</sub>Cl<sub>2</sub> (2 x 10 mL). The organic phases were combined, dried over Na<sub>2</sub>SO<sub>4</sub>, filtered and concentrated under reduced pressure. The residue was purified by column chromatography on silica gel eluting with CH<sub>2</sub>Cl<sub>2</sub> to give **1ba** as a colorless oil (284 mg, 1.22 mmol, 71%). [α]<sub>D</sub> = 0 (c 1.8, CDCl<sub>3</sub>). <sup>1</sup>H NMR (500 MHz, CDCl<sub>3</sub>) δ 7.35-7.28 (m, 2 H), 7.28-7.16 (m, 3 H), 5.70 (ddt, *J* = 17.1, 10.1, 6.9 Hz, 1 H), 5.05-4.99 (m, 1 H), 4.97 (ddt, *J* = 10.2, 2.2, 1.1 Hz, 1 H), 3.57 (s, 3 H), 3.35 (quint, *J* = 7.3 Hz, 1 H), 3.12 (s, 3 H), 2.76 (d, *J* = 7.3 Hz, 2 H), 2.52-2.38 (m, 2 H); <sup>13</sup>C NMR (126 MHz, CDCl<sub>3</sub>) δ 144.5, 136.5, 128.5, 127.7, 126.4, 116.6, 61.3, 41.2, 40.5, 38.1, 32.2, 1C (C=O) is missing; HRMS-ESI *m/z* [M+H]<sup>+</sup> calcd for C<sub>14</sub>H<sub>20</sub>NO<sub>2</sub>: 234.1494; found: 234.1495.

**N-Methoxy-3-(4-methoxyphenyl)-N-methylhex-5-enamide 1ab<sup>7</sup>**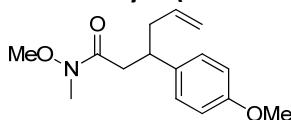

<sup>1</sup>H NMR (500 MHz, CDCl<sub>3</sub>) δ 7.23-7.12 (m, 2 H), 6.90-6.77 (m, 2 H), 5.69 (ddt, *J* = 17.2, 10.2, 7.0 Hz, 1 H), 5.04-4.92 (m, 2 H), 3.79 (s, 3 H), 3.57 (s, 3 H), 3.30 (quint, *J* = 7.3 Hz, 1 H), 3.11 (s, 3 H), 2.72 (br d, *J* = 7.3 Hz, 2 H), 2.42 (qt, *J* = 8.8, 6.7 Hz, 2 H); <sup>13</sup>C NMR (126 MHz, CDCl<sub>3</sub>) δ 158.0, 136.6, 128.5, 116.5, 113.7, 61.2, 55.2, 40.6, 40.4, 38.3, 32.1; HRMS-ESI *m/z* [M+H]<sup>+</sup> calcd for C<sub>15</sub>H<sub>22</sub>NO<sub>3</sub>: 264.1594; found: 264.1587.

<sup>6</sup> M. Tredwell, J. A. R. Luft, M. Schuler, K. Tenza, K. N. Houk and V. Gouverneur, *Angew. Chem. Int. Ed.*, 2008, **47**, 357.

<sup>7</sup> A. Coelho, M.-S. Souvenir Zafindrajaona, A. Vallée, J.-B. Behr and J.-L. Vasse, *Chem. Eur. J.*, 2022, **28**, e202103789

### ***N*-Methoxy-*N*-methyl-3-[4-(trifluoromethyl)phenyl]hex-5-enamide 1ac<sup>7</sup>**

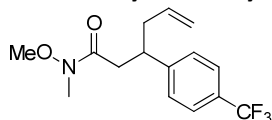

<sup>1</sup>H NMR (500 MHz, CDCl<sub>3</sub>) δ 7.56 (d, *J* = 8.0 Hz, 2 H), 7.36 (d, *J* = 8.0 Hz, 2 H), 5.66 (ddt, *J* = 17.1, 10.1, 7.0 Hz, 1 H), 5.05-4.96 (m, 2 H), 3.61 (s, 3 H), 3.42 (quint, *J* = 7.3 Hz, 1 H), 3.12 (s, 3 H), 2.78 (d, *J* = 7.3 Hz, 2 H), 2.50-2.39 (m, 2 H); <sup>13</sup>C NMR (126 MHz, CDCl<sub>3</sub>) δ 172.6, 148.6, 135.8, 128.7 (q, *J* = 32.2 Hz), 128.1, 125.4 (q, *J* = 3.7 Hz), 124.40 (q, *J* = 272 Hz), 117.2, 61.3, 41.0, 40.5, 37.1, 32.2; <sup>19</sup>F NMR (471 MHz, CDCl<sub>3</sub>) δ -62.36; HRMS-ESI *m/z* [M+H]<sup>+</sup> calcd for C<sub>15</sub>H<sub>19</sub>F<sub>3</sub>NO<sub>2</sub>: 302.1368; found: 302.1368.

### **3-(Furan-2-yl)-*N*-methoxy-*N*-methylhex-5-enamide 1ad<sup>7</sup>**

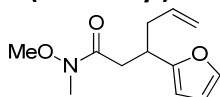

<sup>1</sup>H NMR (500 MHz, CDCl<sub>3</sub>) δ 7.31 (dd, *J* = 1.8, 0.9 Hz, 1 H), 6.26 (dd, *J* = 3.2, 1.9 Hz, 1 H), 6.04 (d, *J* = 3.2 Hz, 1 H), 5.71 (ddt, *J* = 17.1, 10.2, 7.0 Hz, 1 H), 5.07-4.99 (m, 1 H), 5.02-4.96 (m, 1 H), 3.62 (s, 3 H), 3.50-3.43 (m, 1 H), 3.15 (s, 3 H), 2.80 (dd, *J* = 15.8, 7.3 Hz, 1 H), 2.66 (dd, *J* = 15.9, 6.7 Hz, 1 H), 2.54-2.36 (m, 2 H); <sup>13</sup>C NMR (126 MHz, CDCl<sub>3</sub>) δ 141.1, 136.0, 116.9, 110.1, 105.3, 61.3, 38.1, 35.5, 34.7, 29.2; HRMS-ESI *m/z* [M+H]<sup>+</sup> calcd for C<sub>12</sub>H<sub>18</sub>NO<sub>3</sub>: 224.1287; found: 224.1285.

### **3-Isopropyl-*N*-methoxy-*N*-methylhex-5-enamide 1ae<sup>7</sup>**

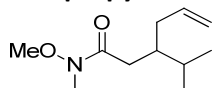

<sup>1</sup>H NMR (500 MHz, CDCl<sub>3</sub>) δ 5.76 (ddt, *J* = 16.8, 10.2, 6.8 Hz, 1 H), 5.03-4.97 (m, 2 H), 3.67 (s, 3 H), 3.16 (s, 3 H), 2.40-2.25 (m, 2 H), 2.16-2.06 (m, 1 H), 2.05-1.93 (m, 2 H), 1.81-1.70 (m, 1 H), 0.88 (d, *J* = 5.2 Hz, 3 H), 0.87 (d, *J* = 5.1 Hz, 3 H); <sup>13</sup>C NMR (126 MHz, CDCl<sub>3</sub>) δ 137.8, 116.0, 68.1, 39.7, 35.7, 32.7, 29.7, 19.3, 18.9; HRMS-ESI *m/z* [M+H]<sup>+</sup> calcd for C<sub>11</sub>H<sub>22</sub>NO<sub>2</sub>: 200.1651; found: 200.1651.

### ***N*-Methoxy-*N*-methyl-3-phenethylhex-5-enamide 1af<sup>7</sup>**

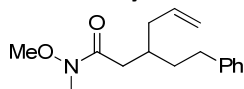

<sup>1</sup>H NMR (500 MHz, CDCl<sub>3</sub>) δ 7.32-7.25 (m, 2 H), 7.23-7.16 (m, 3 H), 5.82 (ddt, *J* = 17.1, 10.3, 6.9 Hz, 1 H), 5.13-5.03 (m, 2 H), 3.68 (s, 3 H), 3.20 (s, 3 H), 2.76-2.58 (m, 2 H), 2.44 (qd, *J* = 15.3, 5.5 Hz, 2 H), 2.30-2.09 (m, 3H), 1.68 (td, *J* = 8.2, 5.9 Hz, 2 H); <sup>13</sup>C NMR (126 MHz, CDCl<sub>3</sub>) δ 142.7, 136.6, 128.4, 128.4, 125.8, 116.8, 61.3, 38.3, 36.1, 35.9, 34.0, 33.3, 32.3.

### **(*E*)-3-Allyl-*N*-methoxy-*N*,4,4-trimethyl-7-phenylhept-6-enamide 1ag**

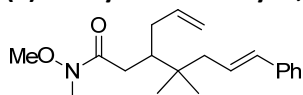

Prepared according to **procedure B** from **S8** (476 mg, 1.39 mmol) and isolated as a colorless oil (340 mg, 1.13 mmol, 81%). <sup>1</sup>H NMR (500 MHz, C CDCl<sub>3</sub>) δ 7.37-7.33 (m, 2 H), 7.31-7.27 (m, 2 H), 7.23-7.15 (m, 1 H), 6.38 (d, *J* = 15.7 Hz, 1 H), 6.28 (dt, *J* = 15.6, 7.3 Hz, 1 H), 5.78 (dddd, *J* = 17.1, 10.0, 8.8, 5.2 Hz, 1 H), 5.01 (dq, *J* = 17.2, 1.7 Hz, 1 H), 4.96 (dt, *J* = 10.0, 1.9 Hz, 1 H), 3.66 (s, 3 H), 3.14 (s, 3 H), 2.53 (dd, *J* = 16.1, 4.7 Hz, 1 H), 2.42 (dtd, *J* = 14.0, 3.5, 1.7 Hz, 1 H), 2.30 (dd, *J* = 16.1, 6.9 Hz, 1 H), 2.23-2.20 (m, 1 H), 2.18 (dd, *J* = 7.4, 1.1 Hz, 2 H), 1.87 (dt, *J* = 14.0, 9.3 Hz, 1 H), 0.93 (s, 3 H), 0.93 (s, 3 H); <sup>13</sup>C NMR (126 MHz, CDCl<sub>3</sub>) δ 174.7, 138.4, 137.7, 132.5, 128.6, 127.2, 127.1, 126.1, 116.1, 62.6, 44.1, 43.0, 42.7, 37.3, 37.1, 35.5, 25.1, 24.8; HRMS-ESI *m/z* [M+H]<sup>+</sup> calcd for C<sub>20</sub>H<sub>30</sub>NO<sub>2</sub>: 316.2277; found: 316.2279.

### 3-(2-Bromophenyl)-*N*-methoxy-*N*-methylhex-5-enamide **1ah**

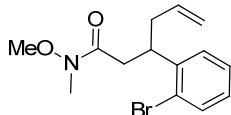

Prepared according to **procedure B** from **S2** (145 mg, 0.45 mmol) and isolated as a colorless oil (112 mg, 0.36 mmol, 80%).  $^1\text{H NMR}$  (500 MHz,  $\text{CDCl}_3$ )  $\delta$  7.53 (dd,  $J = 8.0, 1.3$  Hz, 1 H), 7.29-7.19 (m, 2 H), 7.04 (ddd,  $J = 7.8, 6.9, 2.1$  Hz, 1 H), 5.69 (ddt,  $J = 17.2, 10.1, 7.0$  Hz, 1 H), 5.03-4.95 (m, 1H), 4.99-4.92 (m, 1 H), 3.88 (p,  $J = 7.2$  Hz, 1 H), 3.64 (s, 3 H), 3.12 (s, 3 H), 2.76 (d,  $J = 7.3$  Hz, 2 H), 2.45 (t,  $J = 7.0$  Hz, 2 H);  $^{13}\text{C NMR}$  (126 MHz,  $\text{CDCl}_3$ )  $\delta$  172.7, 143.1, 135.8, 133.1, 127.8, 127.4, 125.0, 116.9, 61.3, 39.4, 39.3, 36.8, 32.2; HRMS-ESI  $m/z$   $[\text{M}+\text{H}]^+$  calcd for  $\text{C}_{14}\text{H}_{19}\text{NO}_2\text{Br}$ : 312.0599; found: 312.0605.

### *N*-Methoxy-*N*-methyl-3-(naphthalen-1-yl)hex-5-enamide **1ai**

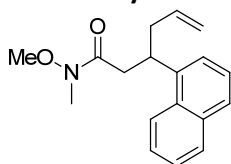

Prepared according to **procedure B** from **S7** (0.65 g, 2.00 mmol) and isolated as a colorless oil (420 mg, 1.48 mmol, 74%).  $^1\text{H NMR}$  (500 MHz,  $\text{CDCl}_3$ )  $\delta$  8.26 (d,  $J = 8.5$  Hz, 1 H), 7.85 (dd,  $J = 8.1, 1.4$  Hz, 1 H), 7.72 (d,  $J = 8.0$  Hz, 1 H), 7.53 (ddd,  $J = 8.5, 6.8, 1.5$  Hz, 1 H), 7.50-7.45 (m, 1 H), 7.44 (d,  $J = 7.8$  Hz, 1 H), 7.40 (dd,  $J = 7.2, 1.4$  Hz, 1 H), 5.71 (ddt,  $J = 17.1, 10.2, 7.0$  Hz, 1 H), 5.04 (dd,  $J = 17.1, 1.8$  Hz, 1 H), 4.94 (ddt,  $J = 10.2, 2.2, 1.1$  Hz, 1 H), 4.31 (p,  $J = 7.0$  Hz, 1 H), 3.60 (s, 3 H), 3.12 (s, 3 H), 2.97-2.81 (m, 2 H), 2.66-2.58 (m, 2 H).  $^{13}\text{C NMR}$  (126 MHz,  $\text{CDCl}_3$ )  $\delta$  140.6, 136.4, 134.1, 131.8, 128.9, 126.9, 126.1, 125.5, 125.4, 123.5, 116.7, 61.3, 39.9, 37.9, 34.8 (br s), 32.3 (br s). HRMS-ESI  $m/z$   $[\text{M}+\text{H}]^+$  calcd for  $\text{C}_{18}\text{H}_{22}\text{NO}_2$ : 284.1651 found: 284.1653.

### 3-Ferrocenyl-*N*-methoxy-*N*-methylhex-5-enamide **1aj**

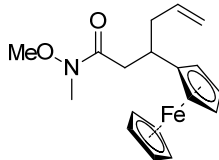

To a solution of **S1** (430 mg, 1.21 mmol) in THF (20 mL) and  $\text{CH}_3\text{NH}(\text{OCH}_3)\cdot\text{HCl}$  (0.455 g, 4.86 mmol) was slowly added a solution of *i*-PrMgCl (2 M in hexanes, 4.86 mL, 9.72 mmol) at  $0^\circ\text{C}$ . The stirring was continued for 2 h at rt, then a saturated aqueous solution of  $\text{NH}_4\text{Cl}$  (5 mL) and water (5 mL) were added. The layers were separated and the aqueous phase was extracted with  $\text{CH}_2\text{Cl}_2$  (2 x 10 mL). The organic phases were combined, dried over  $\text{MgSO}_4$ , filtered and concentrated under reduced pressure. The residue was purified by column chromatography on silica gel eluting with a mixture of PE/EA to give **1aj** as a red oil (380 mg, 1.11 mmol, 92%).  $^1\text{H NMR}$  (500 MHz, DMSO)  $\delta$  5.74 (ddt,  $J = 18.7, 9.3, 7.1$  Hz, 1 H), 5.02-4.95 (m, 2 H), 4.13 (s, 5 H), 4.13-4.06 (m, 2 H), 4.09-4.03 (m, 2 H), 3.61 (s, 3 H), 3.09 (s, 3 H), 2.99 (p,  $J = 7.2$  Hz, 1 H), 2.70-2.55 (m, 2 H), 2.41-2.33 (m, 1 H), 2.22 (dt,  $J = 14.2, 7.5$  Hz, 1 H);  $^{13}\text{C NMR}$  (126 MHz, DMSO)  $\delta$  136.7, 116.4, 93.1, 68.2, 66.8, 66.7, 66.5, 61.0, 36.4, 33.7; HRMS-ESI  $m/z$   $[\text{M}]^+$  calcd for  $\text{C}_{18}\text{H}_{23}\text{NO}_2\text{Fe}$ : 341.1078; found: 341.1081.

### (*S*)-*N*-Methoxy-*N*-methyl-3-(thiophen-2-yl)hex-5-enamide **1ak**

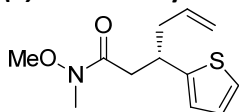

Prepared according to **procedure B** from **S9** (406 mg, 1.54 mmol) and isolated as a colorless oil (269 mg, 1.13 mmol, 73%).  $[\alpha]_D^{25} = 5.4^\circ$  (c 1.28,  $\text{CH}_2\text{Cl}_2$ ).  $^1\text{H NMR}$  (500 MHz,  $\text{CDCl}_3$ )  $\delta$  7.14 (dd,  $J = 5.1, 1.2$  Hz, 1 H), 6.92 (dd,  $J = 5.1, 3.4$  Hz, 1 H), 6.87 (dd,  $J = 3.3, 1.1$  Hz, 1 H), 5.75 (ddt,  $J = 17.1, 10.1, 7.0$  Hz, 1 H), 5.06 (dq,  $J = 17.1, 1.7$  Hz, 1 H), 5.02 (ddd,  $J = 10.2, 2.2, 1.1$  Hz, 1 H), 3.70 (quint,  $J = 7.1$  Hz, 1 H), 3.60 (s,



3 H), 3.15 (s, 3 H), 2.77 (q,  $J = 8.9, 8.3$  Hz, 2 H), 2.49 (tt,  $J = 7.0, 1.4$  Hz, 2 H);  $^{13}\text{C}$  NMR (126 MHz,  $\text{CDCl}_3$ )  $\delta$  172.6, 148.3, 135.9, 126.6, 124.0, 123.0, 117.1, 61.3, 41.4, 38.9, 36.5, 32.2; HRMS-ESI  $m/z$   $[\text{M}+\text{H}]^+$  calcd for  $\text{C}_{12}\text{H}_{18}\text{NO}_2\text{S}$ : 240.1053; found: 240.1047.

### (*R*)-3-[2-(Benzyloxy)ethyl]-*N*-methoxy-*N*-methylhex-5-enamide **1a**

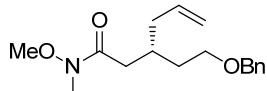

Prepared according to **procedure B** from **S10** (2.51 g, 6.00 mmol) and isolated as a colorless oil (1.13 g, 3.9 mmol, 65%).  $[\alpha]_{\text{D}} = 5.4^\circ$  (c 1.28,  $\text{CH}_2\text{Cl}_2$ ).  $^1\text{H}$  NMR (500 MHz,  $\text{CDCl}_3$ )  $\delta$  7.37-7.25 (m, 5 H), 5.85-5.74 (m, 1 H), 5.08-5.01 (m, 2H), 4.52 (AB system, d,  $J = 11.9$  Hz, 1 H), 4.50 (AB system, d,  $J = 11.9$  Hz, 1 H), 3.64 (s, 3H), 3.58-3.52 (m, 2 H), 3.17 (s, 3 H), 2.49-2.36 (m, 2 H), 2.29-2.08 (m, 3 H), 1.75-1.65 (m, 2 H);  $^{13}\text{C}$  NMR (126 MHz,  $\text{CDCl}_3$ )  $\delta$  138.7, 136.6, 128.4, 127.8, 127.6, 116.8, 73.0, 68.7, 61.3, 38.7, 36.2, 33.8, 32.0, 31.7; HRMS-ESI  $m/z$   $[\text{M}+\text{Na}]^+$  calcd for  $\text{C}_{17}\text{H}_{25}\text{NO}_3\text{Na}$ : 314.1732; found: 314.1732.

### (*S*)-2-Benzyl-*N*-methoxy-*N*-methylpent-4-enamide **1ba**<sup>7</sup>

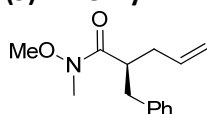

Prepared from **S12** (0.45 g, 2.37 mmol) and isolated as a colorless oil (0.355 g, 1.52 mmol, 64%).  $[\alpha]_{\text{D}} + 40$  (c 1,  $\text{CH}_2\text{Cl}_2$ ).  $^1\text{H}$  NMR (500 MHz,  $\text{CDCl}_3$ )  $\delta$  7.29-7.14 (m, 5 H), 5.76 (ddt,  $J = 17.1, 10.1, 7.0$  Hz, 1 H), 5.07 (dq,  $J = 17.1, 1.7$  Hz, 1 H), 5.01 (dd,  $J = 10.3, 2.0$  Hz, 1 H), 3.32 (s, 3 H), 3.20 (br s, 1 H), 3.08 (s, 3 H), 2.97 (dd,  $J = 13.3, 9.0$  Hz, 1 H), 2.71 (dd,  $J = 13.3, 5.8$  Hz, 1 H), 2.44 (dt,  $J = 14.8, 7.7$  Hz, 1 H), 2.24 (dt,  $J = 13.5, 6.4$  Hz, 1 H);  $^{13}\text{C}$  NMR (126 MHz,  $\text{CDCl}_3$ )  $\delta$  175.9, 140.1, 135.8, 129.2, 128.4, 126.3, 116.8, 61.2, 43.2, 38.3, 36.7, 32.0; HMRS ESI  $m/z$   $[\text{M}+\text{H}]^+$  calcd for  $\text{C}_{14}\text{H}_{20}\text{NO}_2$ : 234.1494; found: 234.1496.

### 2-[3-(Benzyloxy)propyl]-*N*-methoxy-*N*-methylpent-4-enamide **1bb**<sup>8</sup>

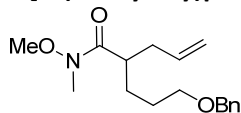

$^1\text{H}$  NMR (500 MHz,  $\text{CDCl}_3$ )  $\delta$  7.52-7.20 (m, 5 H), 5.75 (ddt,  $J = 17.2, 10.1, 7.1$  Hz, 1 H), 5.05 (dq,  $J = 17.1, 1.6$  Hz, 1 H), 4.99 (dq,  $J = 10.1, 1.0$  Hz, 1 H), 4.49 (d,  $J = 12.0$  Hz, 1 H), 4.47 (d,  $J = 12.0$  Hz, 1 H), 3.63 (s, 3 H), 3.45 (tdd,  $J = 9.2, 6.2, 3.0$  Hz, 2 H), 3.17 (s, 3 H), 2.93 (br s, 1 H), 2.38 (dt,  $J = 15.0, 7.6$  Hz, 1 H), 2.19 (dt,  $J = 13.6, 6.6$  Hz, 1 H), 1.71-1.54 (m, 4 H);  $^{13}\text{C}$  NMR (126 MHz,  $\text{CDCl}_3$ )  $\delta$  176.1, 138.6, 136.1, 128.4, 127.7, 127.6, 116.6, 73.0, 70.3, 61.5, 40.6, 37.0, 32.2, 28.8, 27.8. HRMS-ESI  $m/z$   $[\text{M}+\text{H}]^+$  calcd for  $\text{C}_{17}\text{H}_{25}\text{NO}_3$ : 292.1913; found: 292.1915.

### 2-Allyl-*N*-methoxy-*N*,5-dimethylhexanamide **1bc**

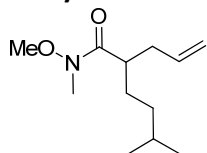

Prepared according to **procedure B** from **methyl 2-allyl-5-methylhexanoate** (0.55 g, 3 mmol) and isolated as a colorless oil (579 mg, 2.72 mmol, 92%).  $^1\text{H}$  NMR (500 MHz,  $\text{CDCl}_3$ )  $\delta$  5.74 (ddt,  $J = 17.0, 9.9, 7.1$  Hz, 1 H), 5.04 (dq,  $J = 17.0, 1.5$  Hz, 1 H), 4.97 (ddt,  $J = 10.2, 2.0, 1.1$  Hz, 1 H), 3.66 (s, 3 H), 3.17 (s, 3 H), 2.86 (s, 1 H), 2.36 (dt,  $J = 15.0, 7.6$  Hz, 1 H), 2.17 (dt,  $J = 13.7, 6.6$  Hz, 1 H), 1.68-1.57 (m, 1H), 1.52-1.38 (m, 2 H), 1.18-1.00 (m, 2 H), 0.85 (d,  $J = 6.7$  Hz, 6 H);  $^{13}\text{C}$  NMR (126 MHz,  $\text{CDCl}_3$ )  $\delta$  177.4, 136.4, 116.4, 61.5, 41.0, 36.9, 36.7, 30.1, 28.3, 22.7, 22.6; HRMS ESI  $m/z$   $[\text{M}+\text{H}]^+$  calcd for  $\text{C}_{12}\text{H}_{24}\text{NO}_2$ : 214.1807; found: 214.1806.

<sup>8</sup> A. Coelho, C. Machado-Rodrigues, J.-B. Behr and J.-L. Vasse, *Org. Lett.*, 2021, **23**, 772.

### ***N*-Methoxy-*N*-methyl-2-phenylpent-4-enamide 1bd<sup>9</sup>**

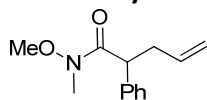

<sup>1</sup>H NMR (500 MHz, CDCl<sub>3</sub>) δ 7.37-7.18 (m, 5 H), 5.74 (ddt, *J* = 17.1, 10.1, 6.9 Hz, 1 H), 5.05 (dq, *J* = 17.1, 1.7 Hz, 1 H), 5.01-4.94 (m, 1 H), 4.14-3.97 (m, 1 H), 3.46 (s, 3 H), 3.15 (s, 3 H), 2.84 (ddd, *J* = 14.1, 8.4, 7.0 Hz, 1 H), 2.46 (dtt, *J* = 14.0, 6.9, 1.4 Hz, 1 H); <sup>13</sup>C NMR (126 MHz, CDCl<sub>3</sub>) δ 139.7, 136.2, 128.6, 128.2, 127.0, 116.6, 61.3, 47.7, 38.3, 32.3.

### ***N*-Methoxy-2-(4-methoxyphenyl)-*N*-methylpent-4-enamide 1be<sup>7</sup>**

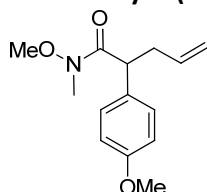

<sup>1</sup>H NMR (500 MHz CDCl<sub>3</sub>) δ 7.26-7.20 (m, 2 H), 6.87-6.80 (m, 2 H), 5.73 (ddt, *J* = 17.1, 10.2, 6.9 Hz, 1 H), 5.04 (dq, *J* = 17.1, 1.6 Hz, 1 H), 4.97 (ddt, *J* = 10.1, 2.0, 1.1 Hz, 1 H), 4.03 (br s, 1 H), 3.77 (s, 3 H), 3.48 (s, 3 H), 3.14 (s, 3 H), 2.79 (dt, *J* = 14.3, 7.6 Hz, 1 H), 2.43 (dt, *J* = 14.0, 6.9 Hz, 1 H); <sup>13</sup>C NMR (126 MHz, CDCl<sub>3</sub>) δ 158.6, 136.3, 131.8, 129.2, 116.5, 114.0, 61.4, 55.3, 46.7, 38.3, 32.3; HRMS-ESI *m/z* [M+H]<sup>+</sup> calcd for C<sub>14</sub>H<sub>20</sub>NO<sub>3</sub>: 250.1443; found: 250.1444.

### **2-(4-Fluorophenyl)-*N*-methoxy-*N*-methylpent-4-enamide 1bf<sup>7</sup>**

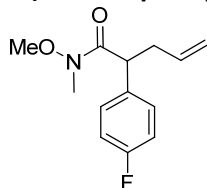

<sup>1</sup>H NMR (500 MHz, CDCl<sub>3</sub>) δ 7.34-7.27 (m, 2 H), 6.98 (t, *J* = 8.7 Hz, 2 H), 5.71 (ddt, *J* = 17.0, 10.0, 6.9 Hz, 1 H), 5.04 (dq, *J* = 17.2, 1.6 Hz, 1 H), 4.98 (dq, *J* = 10.2, 2.0 Hz, 1 H), 4.06 (br s, 1 H), 3.50 (s, 3 H), 3.15 (s, 3 H), 2.80 (dt, *J* = 14.9, 7.6 Hz, 1 H), 2.43 (dt, *J* = 14.1, 7.0 Hz, 1 H); <sup>13</sup>C NMR (126 MHz, CDCl<sub>3</sub>) δ 162.9, 161.0, 135.9, 129.8, 129.7, 116.9, 115.5, 115.4, 61.4, 46.8, 38.3, 32.3 (br s); <sup>19</sup>F NMR (471 MHz, CDCl<sub>3</sub>) δ -115.85; HRMS-ESI *m/z* [M+H]<sup>+</sup> calcd for C<sub>13</sub>H<sub>17</sub>FNO<sub>2</sub>: 238.1243; found: 238.1244.

### **2-(2-Bromophenyl)-*N*-methoxy-*N*-methylpent-4-enamide 1bg<sup>7</sup>**

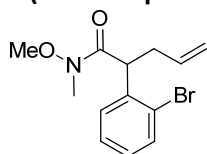

<sup>1</sup>H NMR (500 MHz, CDCl<sub>3</sub>) δ 7.57 (dd, *J* = 8.0, 1.3 Hz, 1 H), 7.40 (dd, *J* = 7.8, 1.7 Hz, 1 H), 7.29-7.23 (m, 1 H), 7.09 (ddd, *J* = 8.1, 7.3, 1.8 Hz, 1 H), 5.82 (ddt, *J* = 17.1, 10.2, 6.9 Hz, 1 H), 5.06 (dq, *J* = 17.1, 1.6 Hz, 1 H), 4.99 (ddt, *J* = 10.1, 1.9, 1.1 Hz, 1 H), 4.60 (br s, 1 H), 3.46 (s, 3 H), 3.16 (s, 3 H), 2.75 (dt, *J* = 14.8, 7.7 Hz, 1 H), 2.39 (ddd, *J* = 14.6, 7.4, 6.2, 1.3 Hz, 1 H); <sup>13</sup>C NMR (126 MHz, CDCl<sub>3</sub>) δ 139.4, 135.8, 132.9, 128.7, 128.4, 128.0, 116.8, 61.4, 46.7, 37.7, 32.5, 29.8; HRMS-ESI *m/z* [M+H]<sup>+</sup> calcd for C<sub>13</sub>H<sub>17</sub>BrNO<sub>2</sub>: 298.0443; found: 298.0448.

<sup>9</sup> Z. Escobar, M. Johansson, A. Bjartell, R. Hellsten and O. Sterner, *Int. J. Org. Chem.*, 2014, **4**, 225.

### ***N*-Methoxy-*N*-methyl-2-(thiophen-2-yl)pent-4-enamide **1bh**<sup>7</sup>**

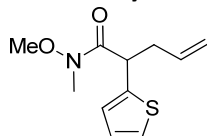

<sup>1</sup>H NMR (500 MHz, CDCl<sub>3</sub>) δ 7.18 (dd, *J* = 5.0, 1.3 Hz, 1 H), 7.00-6.94 (m, 1 H), 6.93 (dd, *J* = 5.0, 3.5 Hz, 1 H), 5.75 (ddt, *J* = 17.0, 10.1, 6.9 Hz, 1 H), 5.09 (dq, *J* = 17.1, 1.6 Hz, 1 H), 5.02 (ddt, *J* = 10.3, 2.0, 1.0 Hz, 1 H), 4.45 (br s, 1 H), 3.63 (s, 3 H), 3.19 (s, 3 H), 2.83 (dddt, *J* = 15.3, 8.3, 6.9, 1.2 Hz, 1 H), 2.55 (dtt, *J* = 13.9, 6.9, 1.3 Hz, 1 H); <sup>13</sup>C NMR (126 MHz, CDCl<sub>3</sub>) δ 135.5, 126.6, 125.2, 124.5, 117.2, 61.6, 42.3, 39.3, 32.4 (br s); HRMS-ESI *m/z* [M+H]<sup>+</sup> calcd for C<sub>11</sub>H<sub>16</sub>NO<sub>2</sub>S: 226.0902; found: 226.0902.

### ***(E)*-2-Allyl-*N*-methoxy-*N*-methyl-5-phenylpent-4-enamide **1bi**<sup>7</sup>**

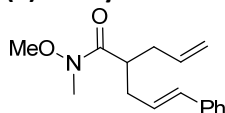

<sup>1</sup>H NMR (500 MHz, CDCl<sub>3</sub>) δ 7.38-7.18 (m, 5 H), 6.45 (d, *J* = 15.8 Hz, 1 H), 6.19 (dt, *J* = 15.8, 7.3 Hz, 1 H), 5.81 (ddt, *J* = 17.2, 10.2, 7.1 Hz, 1 H), 5.11 (dq, *J* = 17.1, 1.6 Hz, 1 H), 5.05 (ddt, *J* = 10.1, 2.0, 1.0 Hz, 1 H), 3.68 (s, 3 H), 3.20 (s, 3 H), 3.10 (br s, 1 H), 2.56 (dt, *J* = 14.3, 7.3 Hz, 1 H), 2.47 (dt, *J* = 15.1, 7.6 Hz, 1 H), 2.40 (dt, *J* = 13.7, 7.3 Hz, 1 H), 2.29 (dt, *J* = 13.7, 6.6 Hz, 1 H); <sup>13</sup>C NMR (126 MHz, CDCl<sub>3</sub>) δ 176.2, 137.6, 135.9, 132.0, 128.6, 127.7, 127.1, 126.1, 116.8, 61.7, 41.1, 36.4, 35.6, 32.3 (br s); HRMS ESI *m/z* [M+H]<sup>+</sup> calcd for C<sub>16</sub>H<sub>22</sub>NO<sub>2</sub>: 260.1651; found: 260.1654.

### **5-[3-(Benzyloxy)propyl]-3,4-dihydro-2H-pyran **4b****

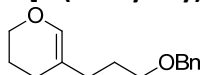

To a solution of **2bb** (53 mg, 0.18 mmol) in THF (2 mL) was added *t*-BuOK (20 mg, 0.18 mmol) at 0°C. The resulting mixture was stirred 30 min at rt, then water (10 mL) was added. The layers were separated and the aqueous phase was extracted with Et<sub>2</sub>O (2 x 10 mL). The organic phases were combined, dried over Na<sub>2</sub>SO<sub>4</sub>, filtered and concentrated under reduced pressure. The residue was purified by column chromatography on silica gel eluting with a mixture of PE/Et<sub>2</sub>O (80/20) to give **4b** as a colorless oil (34 mg, 0.14 mmol, 80%). <sup>1</sup>H NMR (500 MHz, CDCl<sub>3</sub>) δ 7.42-7.25 (m, 5 H), 6.22 (t, *J* = 1.5 Hz, 1 H), 4.50 (s, 2 H), 3.87 (t, *J* = 5.1 Hz, 2 H), 3.46 (t, *J* = 6.5 Hz, 2 H), 1.98-1.90 (m, 4 H), 1.89-1.80 (m, 2 H), 1.74-1.63 (m, 2 H); <sup>13</sup>C NMR (126 MHz, CDCl<sub>3</sub>) δ 139.2, 138.7, 128.5, 127.7, 127.6, 112.0, 73.0, 69.9, 65.3, 29.8, 28.1, 23.1, 22.7; HRMS ESI *m/z* [M+H]<sup>+</sup> calcd for C<sub>15</sub>H<sub>21</sub>O<sub>2</sub>: 233.1542; found: 233.1542.

### **5-Phenyl-3,4-dihydro-2H-pyran **4d**<sup>10</sup>**

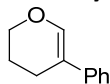

To a solution of **1bd** (75 mg, 0.34 mmol) in CH<sub>2</sub>Cl<sub>2</sub> (3.5 mL) was added Cp<sub>2</sub>Zr(H)Cl (176 mg, 0.68 mmol) in one portion at room temperature. The resulting mixture was stirred until complete dissolution (ca 30 min). Then NBS (61 mg, 0.34 mmol) was added dropwise at rt, then the stirring was continued for 30 min at rt. Water (5 mL) was added. The layers were separated and the aqueous phase was extracted with Et<sub>2</sub>O (2 x 5 mL). The organic phases were combined, dried over Na<sub>2</sub>SO<sub>4</sub>, filtered and concentrated under reduced pressure. To a solution of crude **2bd** in THF (3.5 mL) was added *t*-BuOK at 0°C. The resulting mixture was stirred 30 min at rt, then, water (10 mL) was added. The layers were separated and the aqueous phase was extracted with Et<sub>2</sub>O (2 x 10 mL). The organic phases were combined, dried over Na<sub>2</sub>SO<sub>4</sub>, filtered and concentrated under reduced pressure. The residue was purified by column

<sup>10</sup> J. J. Verendel, J.-Q. Li, X. Quan, B. Peters, T. Zhou, O. R. Gautun, T. Govender and P. G. Andersson, *Chem. Eur. J.*, 2012, **18**, 6509.

chromatography on silica gel eluting with a mixture of PE/Et<sub>2</sub>O 80/20 to give **4d** as a colorless oil (47 mg, 0.29 mmol, 86%). <sup>1</sup>H NMR (500 MHz, CDCl<sub>3</sub>) δ 7.21 (d, *J* = 4.3 Hz, 4 H), 7.09 (dt, *J* = 8.7, 4.2 Hz, 1 H), 6.85 (s, 1 H), 3.95 (t, *J* = 5.2 Hz, 2 H), 2.34 (td, *J* = 6.4, 1.6 Hz, 2 H), 1.96-1.91 (m, 2 H); <sup>13</sup>C NMR (126 MHz, CDCl<sub>3</sub>) δ 142.2, 139.7, 128.5, 125.9, 124.2, 113.0, 65.7, 22.5, 22.4.

### Methyl (*E*)-3-[(1*R*,2*S*)-2-phenylcyclopentyl]acrylate **6a**

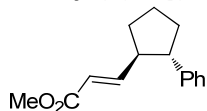

To a solution of **5a** (210 mg, 1.21 mmol) in CH<sub>2</sub>Cl<sub>2</sub> (5 mL) was added methyl 2-(triphenylphosphoranylidene)acetate (808 mg, 2.42 mmol) at room temperature. The resulting mixture was stirred 24 h at 80°C and concentrated under reduced pressure. The residue was purified by column chromatography on silica gel eluting with CH<sub>2</sub>Cl<sub>2</sub> (R<sub>f</sub> 0.8) to give **6a** as a colorless oil (271 mg, 1.17 mmol, 97%), *E/Z* 93:7, [α]<sub>D</sub> +123° (c 1.26, CH<sub>2</sub>Cl<sub>2</sub>). NMR (500 MHz, CDCl<sub>3</sub>) <sup>1</sup>H δ 7.39-7.24 (m, 2 H), 7.23-7.07 (m, 3 H), 6.90 (dd, *J* = 15.7, 8.1 Hz, 1 H), 5.65 (dd, *J* = 15.7, 1.1 Hz, 1 H), 3.67 (s, 3 H), 2.82 (td, *J* = 9.7, 7.9 Hz, 1 H), 2.74-2.65 (m, 1 H), 2.20-2.13 (m, 1 H), 2.10-2.01 (m, 1 H), 1.89-1.73 (m, 3 H), 1.73-1.57 (m, 1 H); NMR (126 MHz, CDCl<sub>3</sub>) <sup>13</sup>C δ 167.1, 151.8, 143.5, 128.4, 127.3, 126.3, 120.2, 52.2, 51.3, 50.7, 35.2, 32.5, 24.3; HRMS ESI *m/z* [M+H]<sup>+</sup> calcd for C<sub>15</sub>H<sub>19</sub>O<sub>2</sub>: 231.1385; found: 231.1380.

### (*R*)-2-Methyl-*N*-{(*E*)-[(1*S*,2*S*)-2-phenylcyclopentyl]methylene}propane-2-sulfinamide **7a**

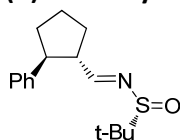

To a solution of **5a** (114 mg, 0.66 mmol) in CH<sub>2</sub>Cl<sub>2</sub> (3 mL) was added (*R*)-2-methylpropane-2-sulfinamide (80 mg, 0.66 mmol) and CuSO<sub>4</sub> (209 mg, 1.32 mmol). The resulting mixture was stirred 72h at 80°C. Brine (5 mL) was added, and the layers were separated and the aqueous phase was extracted with AE (2 x 5 mL). The organic phases were combined, dried over Na<sub>2</sub>SO<sub>4</sub>, filtered and concentrated under reduced pressure to give **7a** as a colorless oil (184 mg, 0.66 mmol, 100%), [α]<sub>D</sub> - 31 (c 1.42, CH<sub>2</sub>Cl<sub>2</sub>); <sup>1</sup>H NMR (500 MHz, CDCl<sub>3</sub>) δ 7.93 (d, *J* = 6.2 Hz, 1 H), 7.31-7.08 (m, 5 H), 3.21-3.02 (m, 2 H), 2.30-2.22 (m, 1 H), 2.16-2.07 (m, 1 H), 1.98-1.77 (m, 4 H), 0.96 (s, 9 H); <sup>13</sup>C NMR (126 MHz, CDCl<sub>3</sub>) δ 171.3, 142.9, 128.6, 127.6, 126.5, 56.5, 53.9, 50.7, 35.7, 30.3, 24.7, 22.2; HRMS ESI *m/z* [M+Na]<sup>+</sup> calcd for C<sub>16</sub>H<sub>24</sub>NOS: 278.1579; found: 278.1581.

### (*R,E*)-*N*-{[(1*S*,2*R*)-2-[2-(Benzyloxy)ethyl]cyclopentyl]methylene}-2-methylpropane-2-sulfinamide **7l**

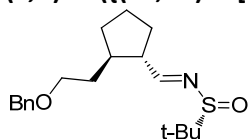

Prepared according to the above procedure from **5l** (24 mg, 0.10 mmol) and isolated as a colorless oil (35 mg, 0.10 mmol, 100%). [α]<sub>D</sub> -143 (c 0.61 CH<sub>2</sub>Cl<sub>2</sub>) <sup>1</sup>H NMR (500 MHz, CDCl<sub>3</sub>) δ 8.00 (d, *J* = 6.2 Hz, 1 H), 7.40-7.26 (m, 5 H), 4.51 (d, *J* = 12.0 Hz, 1 H), 4.47 (d, *J* = 12.0 Hz, 1 H), 3.56-3.44 (m, 2 H), 2.63 (qd, *J* = 8.2, 6.2 Hz, 1 H), 2.12 (pd, *J* = 8.6, 5.1 Hz, 1 H), 2.02-1.83 (m, 3 H), 1.81-1.65 (m, 3 H), 1.59 (ddt, *J* = 13.2, 9.0, 6.4 Hz, 1 H), 1.34 (dq, *J* = 12.6, 8.4 Hz, 1 H), 1.22 (s, 9 H); <sup>13</sup>C NMR (126 MHz, CDCl<sub>3</sub>) δ 172.4, 138.6, 128.5, 127.7, 127.6, 73.0, 69.3, 56.6, 52.2, 41.2, 34.8, 32.7, 30.1, 24.7, 22.5; HRMS ESI *m/z* [M+H]<sup>+</sup> calcd for C<sub>19</sub>H<sub>30</sub>NO<sub>2</sub>S: 336.1997; found: 326.2003.

**(R)-2-Methyl-N-[(S)-1-[(1S,2S)-2-phenylcyclopentyl]ethyl]propane-2-sulfinamide 8a**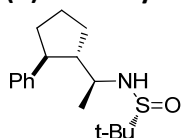

To a solution of **7a** (135 mg, 0.49 mmol) in  $\text{CH}_2\text{Cl}_2$  (3 mL) was added  $\text{MeMgBr}$  (c 3 M in  $\text{Et}_2\text{O}$ , 0.33 mL, 1 mmol) at  $-50^\circ\text{C}$ . The resulting mixture was stirred 4 h at  $-50^\circ\text{C}$ , then overnight at rt. Water (5 mL) was added. The layers were separated and the aqueous phase was extracted with  $\text{AcOEt}$  (2 x 5 mL). The organic phases were combined, dried over  $\text{Na}_2\text{SO}_4$ , filtered and concentrated under reduced pressure to give **8a** as a colorless oil (137 mg, 0.47 mmol, 96%),  $[\alpha]_D^{25} + 34$  (c 0.98,  $\text{CH}_2\text{Cl}_2$ ); NMR (500 MHz,  $\text{CDCl}_3$ )  $\delta$  7.33-7.27 (m, 2 H), 7.26-7.10 (m, 3 H), 3.41-3.29 (m, 1 H), 3.04-2.74 (m, 2 H), 2.11-1.99 (m, 2 H), 1.94-1.87 (m, 1 H), 1.86-1.78 (m, 1 H), 1.74-1.61 (m, 2 H), 1.54-1.45 (m, 1 H), 1.23 (d,  $J = 6.7$  Hz, 3 H), 1.15 (s, 9 H);  $^{13}\text{C}$  NMR (126 MHz,  $\text{CDCl}_3$ )  $\delta$  145.4, 128.6, 127.7, 126.2, 56.0, 54.7, 54.5, 48.1, 36.2, 27.4, 24.7, 22.8, 22.7; HRMS ESI  $m/z$   $[\text{M}+\text{H}]^+$  calcd for  $\text{C}_{17}\text{H}_{28}\text{NOS}$ : 294.1892; found: 294.1889.

**(S)-N-[(S)-1-[(1S,2R)-2-[2-(benzyloxy)ethyl]cyclopentyl]ethyl]-2-methylpropane-2-sulfinamide 8l**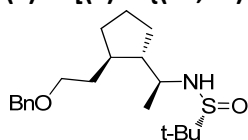

Prepared according to the above procedure from **7l** (31 mg, 0.092 mmol), and isolated as a colorless oil (32 mg, 0.091 mmol, 98%).  $[\alpha]_D^{25} + 9$  (c 0.61  $\text{CH}_2\text{Cl}_2$ ); NMR  $^1\text{H}$  (500 MHz,  $\text{CDCl}_3$ )  $\delta$  7.39-7.26 (m, 5 H), 4.50 (d,  $J = 12.0$  Hz, 1 H), 4.46 (d,  $J = 11.9$  Hz, 1 H), 3.56-3.33 (m, 3 H), 2.83 (d,  $J = 9.1$  Hz, 1 H), 1.89-1.66 (m, 5 H), 1.58-1.44 (m, 4 H), 1.30 (d,  $J = 6.6$  Hz, 3 H), 1.23-1.19 (m, 1 H), 1.18 (s, 9 H); NMR  $^{13}\text{C}$  (126 MHz,  $\text{CDCl}_3$ )  $\delta$  138.7, 128.4, 127.7, 127.6, 72.9, 69.6, 56.1, 55.1, 52.6, 38.5, 35.3, 32.7, 27.2, 24.5, 23.2, 22.9; HRMS ESI  $m/z$   $[\text{M}+\text{H}]^+$  calcd for  $\text{C}_{20}\text{H}_{34}\text{NO}_2\text{S}$ : 352.2310; found: 352.2310.

**Ethyl 4-benzyl-4,5,6,7-tetrahydro-[1,2,3]triazolo[1,5-a]pyridine-3-carboxylate 9**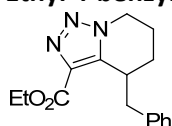

To a solution of **3ba** (130 mg, 0.42 mmol) in acetone (1.5 mL) was added  $\text{NaN}_3$  (137 mg, 2.1 mmol) at room temperature. The resulting mixture was stirred 72h at  $55^\circ\text{C}$  and concentrated under reduced pressure. Water (4 mL) was added. The layers were separated and the aqueous phase was extracted with  $\text{Et}_2\text{O}$  (2 x 4 mL). The organic phases were combined, dried over  $\text{Na}_2\text{SO}_4$ , filtered and concentrated under reduced pressure. The residue was purified by column chromatography on silica gel eluting with a mixture of cyclohexane/AE (80:20) Rf 0.1, to give **9** as a white solid (107 mg, 0.38 mmol, 90%). Mp  $113^\circ\text{C}$ ;  $^1\text{H}$  NMR (500 MHz,  $\text{CDCl}_3$ )  $\delta$  7.50-7.11 (m, 5 H), 4.58 (ddd,  $J = 13.4, 5.7, 2.9$  Hz, 1 H), 4.47 (q,  $J = 7.1$  Hz, 2 H), 4.19 (ddd,  $J = 13.4, 11.1, 5.1$  Hz, 1 H), 3.71 (ddt,  $J = 11.6, 6.2, 3.1$  Hz, 1 H), 3.35 (dd,  $J = 13.5, 3.5$  Hz, 1 H), 2.57 (dd,  $J = 13.5, 11.1$  Hz, 1 H), 2.20-2.14 (m, 1 H), 2.00 (ddt,  $J = 13.8, 5.4, 3.0$  Hz, 1 H), 1.85 (ddt,  $J = 14.3, 5.5, 2.8$  Hz, 1 H), 1.66 (ddt,  $J = 17.8, 14.2, 3.1$  Hz, 1 H), 1.45 (t,  $J = 7.1$  Hz, 1 H);  $^{13}\text{C}$  NMR (126 MHz,  $\text{CDCl}_3$ )  $\delta$  161.6, 142.6, 139.0, 135.4, 129.3, 128.7, 126.8, 61.1, 46.7, 38.9, 33.1, 22.1, 18.2, 14.6; HRMS ESI  $m/z$   $[\text{M}+\text{H}]^+$  calcd for  $\text{C}_{16}\text{H}_{20}\text{N}_3\text{O}_2$ : 286.1556; found: 286.1558.

**5-azido-2-benzylpentanal 10**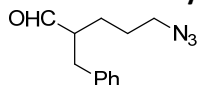

To a solution of **2ba** (87 mg, 0.34 mmol) in DMF (1.5 mL) was added  $\text{NaN}_3$  (27 mg, 0.41 mmol) in one portion at rt. The resulting mixture was stirred overnight at rt. Water (2 mL) was added. The layers were separated and the aqueous phase was extracted with  $\text{Et}_2\text{O}$  (2 x 10 mL). The organic phases were combined, dried over  $\text{Na}_2\text{SO}_4$ , filtered and concentrated under reduced pressure to give **10** as a

colorless oil (74 mg, 0.34 mmol, 100%).  $^1\text{H}$  NMR (500 MHz,  $\text{CDCl}_3$ )  $\delta$  9.69 (d,  $J = 2.2$  Hz, 1 H), 7.34-7.27 (m, 2 H), 7.25-7.19 (m, 1 H), 7.18-7.15 (m, 2 H), 3.26 (t,  $J = 6.5$  Hz, 2 H), 3.02 (dd,  $J = 14.0, 7.1$  Hz, 1 H), 2.74 (dd,  $J = 14.0, 7.2$  Hz, 1 H), 2.69-2.60 (m, 1 H), 1.77-1.48 (m, 4 H);  $^{13}\text{C}$  NMR (126 MHz,  $\text{CDCl}_3$ )  $\delta$  203.9, 138.4, 129.0, 128.8, 126.7, 53.0, 51.3, 35.2, 26.5, 25.6; HRMS ESI  $m/z$   $[\text{M}-\text{N}_2]^+$  calcd for  $\text{C}_{12}\text{H}_{16}\text{NO}$ : 190.1233; found: 190.1233.

### Ethyl (*E*)-7-azido-4-benzylhept-2-enoate **11**

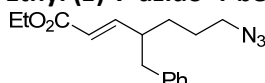

To a solution of **10** (70 mg, 0.32 mmol) in  $\text{CH}_2\text{Cl}_2$  (2 mL) was added ethyl 2-(triphenylphosphoranylidene)acetate (129 mg, 0.39 mmol) at room temperature. The resulting mixture was stirred 1 h at rt and concentrated under reduced pressure. The residue was purified by column chromatography on silica gel eluting with a mixture of  $\text{CH}_2\text{Cl}_2$  (Rf 0.9) to give **11** a colorless oil (70 mg, 0.24, 75%).  $^1\text{H}$  NMR (500 MHz,  $\text{CDCl}_3$ )  $\delta$  7.29-7.23 (m, 2 H), 7.22-7.18 (m, 1 H), 7.14-7.08 (m, 2 H), 6.78 (dd,  $J = 15.7, 9.1$  Hz, 1 H), 5.70 (dd,  $J = 15.6, 0.9$  Hz, 1 H), 4.17 (q,  $J = 7.1$  Hz, 2 H), 3.30-3.09 (m, 2 H), 2.71 (d,  $J = 7.1$  Hz, 2 H), 2.52-2.42 (m, 1 H), 1.68-1.34 (m, 4 H), 1.27 (t,  $J = 7.1$  Hz, 3 H);  $^{13}\text{C}$  NMR (126 MHz,  $\text{CDCl}_3$ )  $\delta$  166.4, 151.4, 139.1, 129.2, 128.5, 126.4, 122.1, 60.4, 51.4, 44.1, 41.1, 30.7, 26.8, 14.3; HRMS ESI  $m/z$   $[\text{M}+\text{H}]^+$  calcd for  $\text{C}_{16}\text{H}_{22}\text{N}_3\text{O}_2$ : 288.1712; found: 288.1713.

### Ethyl 3-benzylpiperidine-2-carboxylate **12**

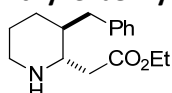

To a solution of **11** (60 mg, 0.21 mmol) in THF (2.5 mL) was added  $\text{Ph}_3\text{P}$  (66 mg, 0.25 mmol) at room temperature. The resulting mixture was stirred overnight at rt and concentrated under reduced pressure. Water (4 mL) was added. The layers were separated and the aqueous phase was extracted with  $\text{Et}_2\text{O}$  (2 x 4 mL). The organic phases were combined, dried over  $\text{Na}_2\text{SO}_4$ , filtered and concentrated under reduced pressure. The residue was purified by column chromatography on silica gel eluting with a mixture of PE :AE to give **12** as a colorless oil (36 mg, 0.13 mmol, 64%) dr 70:30.  $^1\text{H}$  NMR (500 MHz,  $\text{CDCl}_3$ )  $\delta$  7.40-6.99 (m, 5 H), 4.17 (q,  $J = 7.1$  Hz, 2 H), 3.08-2.97 (m, 1 H), 2.91 (dd,  $J = 13.4, 4.1$  Hz, 1 H), 2.86-2.70 (m, 2 H), 2.68-2.57 (m, 2 H), 2.53 (br s, 1 H), 2.20 (dd,  $J = 13.4, 10.0$  Hz, 1 H), 1.76-1.53 (m, 2 H), 1.47-1.31 (m, 1 H), 1.28 (t,  $J = 7.1$  Hz, 3 H), 1.01 (qd,  $J = 12.6, 3.7$  Hz, 1 H);  $^{13}\text{C}$  NMR (126 MHz,  $\text{CDCl}_3$ )  $\delta$  172.9, 140.1, 129.3, 128.4, 126.1, 60.7, 58.3, 46.4, 42.3, 39.2, 38.6, 30.2, 26.1, 14.3; HRMS ESI  $m/z$   $[\text{M}+\text{H}]^+$  calcd for  $\text{C}_{16}\text{H}_{24}\text{NO}_2$ : 262.1807; found: 262.1810.

### (*R*)-*N*-[(*S,E*)-2-Benzyl-5-bromopentylidene]-2-methylpropane-2-sulfinamide **13**

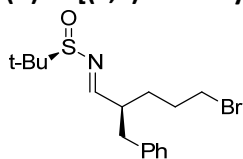

To a solution of (-)-**2ba-Br** (149 mg, 0.59 mmol) in  $\text{CH}_2\text{Cl}_2$  (4 mL) was added  $\text{CuSO}_4$  (188 mg, 1.17 mmol) and (*R*)-2-methylpropane-2-sulfinamide at room temperature. The resulting mixture was refluxed for 24 h. The reaction mixture was cooled down to rt, then water (5 mL) was added. The layers were separated and the aqueous phase was extracted with  $\text{AcOEt}$  (2 x 5 mL). The organic phases were combined, dried over  $\text{Na}_2\text{SO}_4$ , filtered and concentrated under reduced pressure to give **13** as a yellow oil (185 mg, 0.52 mmol, 88%),  $[\alpha]_D^{20} -185$  (c 1.44,  $\text{CH}_2\text{Cl}_2$ );  $^1\text{H}$  NMR (500 MHz,  $\text{CDCl}_3$ )  $\delta$  7.92 (d,  $J = 5.6$  Hz, 1 H), 7.42-7.08 (m, 5 H), 3.38 (t,  $J = 6.6$  Hz, 2 H), 2.94-2.80 (m, 3 H), 2.01-1.80 (m, 2 H), 1.78-1.66 (m, 2 H), 1.03 (s, 9 H);  $^{13}\text{C}$  NMR (126 MHz,  $\text{CDCl}_3$ )  $\delta$  171.5, 138.6, 129.1, 128.7, 126.6, 56.7, 46.7, 38.7, 33.3, 30.5, 30.2, 22.3; HRMS ESI  $m/z$   $[\text{M}+\text{Na}]^+$  calcd for  $\text{C}_{16}\text{H}_{24}\text{NONaSB}$ : 380.0660; found: 380.0667.

**(R)-N-[(2S,3S)-3-Benzyl-6-bromohexan-2-yl]-2-methylpropane-2-sulfinamide **14****

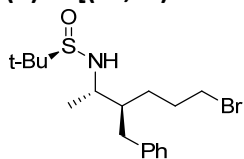

To a solution of **13** (180 mg, 0.50 mmol) in CH<sub>2</sub>Cl<sub>2</sub> (3 mL) was added MeMgBr (3 M in Et<sub>2</sub>O, 0.34 mL, 1 mmol) at -50°C. The resulting mixture was stirred 4 h at -50°C, then overnight at rt. Water (5 mL) was added. The layers were separated and the aqueous phase was extracted with AcOEt (2 x 5 mL). The organic phases were combined, dried over Na<sub>2</sub>SO<sub>4</sub>, filtered and concentrated under reduced pressure to give **14** as a yellow oil (176 mg, 0.47 mmol, 94%), dr >98:2 [ $\alpha$ ]<sub>D</sub> -15° (c 1.3, CH<sub>2</sub>Cl<sub>2</sub>); <sup>1</sup>H NMR (500 MHz, CDCl<sub>3</sub>)  $\delta$  7.58-6.67 (m, 5 H), 3.51-3.46 (m, 1 H), 3.40-3.27 (m, 2 H), 2.84 (d, *J* = 7.5 Hz, 1 H), 2.74 (dd, *J* = 13.7, 6.9 Hz, 1 H), 2.46 (dd, *J* = 13.7, 7.3 Hz, 1 H), 1.88-1.79 (m, 3 H), 1.50 (ddt, *J* = 13.0, 9.1, 6.1 Hz, 1 H), 1.41-1.32 (m, 1 H), 1.27 (d, *J* = 6.7 Hz, 3 H), 1.21 (s, 9 H); <sup>13</sup>C NMR (126 MHz, CDCl<sub>3</sub>)  $\delta$  140.8, 129.2, 128.6, 126.2, 55.9, 53.8, 45.7, 36.2, 33.8, 30.8, 28.7, 22.9, 19.6; HRMS ESI *m/z* [M+H]<sup>+</sup> calcd for C<sub>17</sub>H<sub>29</sub>NOSBr: 374.1553; found: 374.1156.

**(2S,3S)-3-Benzyl-1-[(R)-tert-butylsulfinyl]-2-methylpiperidine **15****

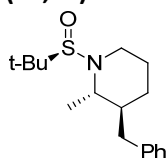

To a solution of **14** (170 mg, 0.46 mmol) in THF (2 mL) was added NaH (13 mg, 0.55 mmol) at 0°C. The resulting mixture was stirred 2 h at rt then, water (5 mL) was added. The layers were separated and the aqueous phase was extracted with Et<sub>2</sub>O (2 x 5 mL). The organic phases were combined, dried over Na<sub>2</sub>SO<sub>4</sub>, filtered and concentrated under reduced pressure to give **15** as a yellow oil (128 mg, 0.44 mmol, 96%), dr >95:5 [ $\alpha$ ]<sub>D</sub> +19 (c 1.2, CH<sub>2</sub>Cl<sub>2</sub>); NMR (500 MHz, CDCl<sub>3</sub>) <sup>1</sup>H  $\delta$  7.43-6.84 (m, 5 H), 3.31 (qd, *J* = 6.8, 2.6 Hz, 1 H), 3.08 (dt, *J* = 13.1, 3.4 Hz, 1 H), 3.01 (ddd, *J* = 13.3, 11.1, 3.2 Hz, 1 H), 2.87 (dd, *J* = 13.7, 6.5 Hz, 1 H), 2.78 (dd, *J* = 13.7, 8.5 Hz, 1 H), 1.85-1.65 (m, 4 H), 1.45-1.39 (m, 1 H), 1.36 (d, *J* = 6.8 Hz, 3 H), 1.25 (s, 9 H); NMR (126 MHz, CDCl<sub>3</sub>) <sup>13</sup>C  $\delta$  141.0, 129.1, 128.4, 126.0, 58.7, 58.4, 41.7, 39.0, 38.8, 23.8, 23.2, 21.3, 16.9; HRMS ESI *m/z* [M+H]<sup>+</sup> calcd for C<sub>17</sub>H<sub>18</sub>NOS: 294.1892; found: 294.1890.

# HPLC of (1S,2S)-2-phenylcyclopentane-1-carbaldehyde 5a

Instrument: LC1260  
 Injection date: 11/12/2021 10:59:46 AM  
 Acq. method: COELHO\_IC\_HEX-IPA\_90-10.M  
 Analysis method: COELHO\_IC\_HEX-IPA\_90-10.M  
 Last changed: 11/12/2021 11:30:16 AM  
 (modified after loading)

Location: Vial 1  
 Injection: 1 of 1  
 Injection volume: 2.000  
 Acq. operator: SYSTEM

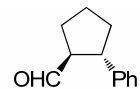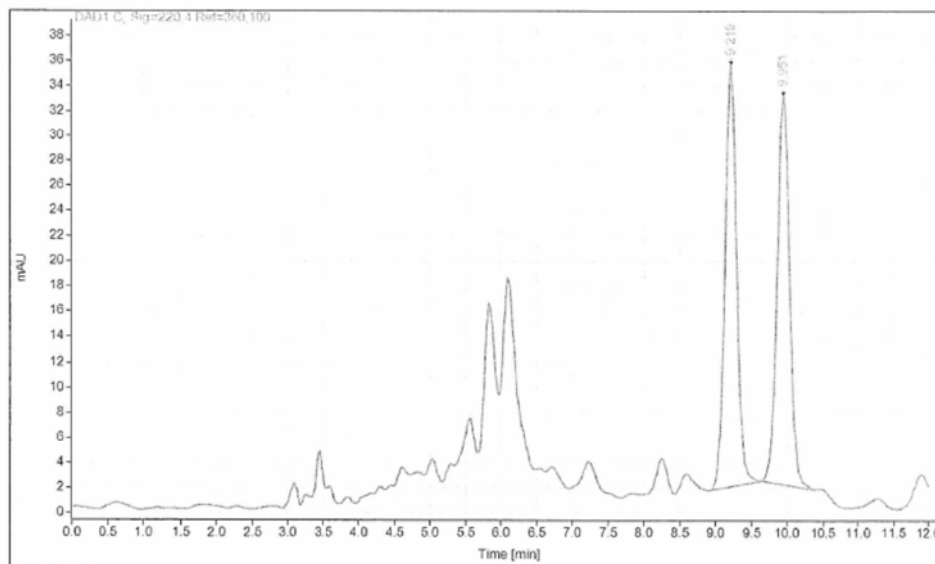

Signal: DAD1 C, Sig=220,4 Ref=360,100

| RT [min] | Area % | Plates | Symm. | Resolution |
|----------|--------|--------|-------|------------|
| 9.22     | 50.40  | 15650  | 0.96  |            |
| 9.95     | 49.60  | 16109  | 0.97  | 2.41       |

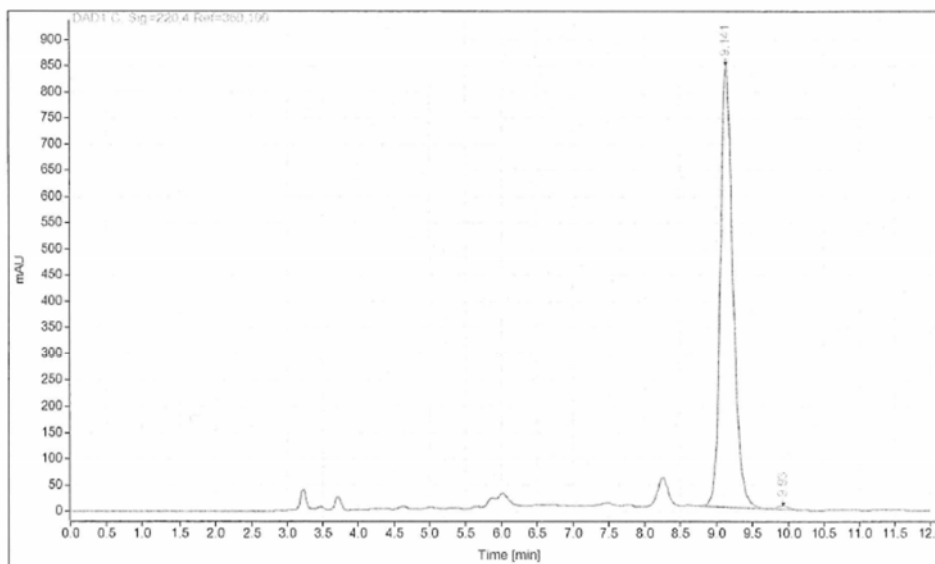

Signal: DAD1 C, Sig=220,4 Ref=360,100

| RT [min] | Area % | Plates | Symm. | Resolution |
|----------|--------|--------|-------|------------|
| 9.14     | 99.25  | 13426  | 0.75  |            |
| 9.93     | 0.7499 | 15983  | 0.97  | 2.51       |



# (1S,2S)-2-(Thiophen-2-yl)cyclopentane-1-carbaldehyde 5k

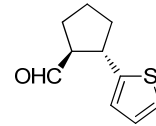

Data file: D:\UMR7312\DATA\COELHO\AC763\_291121-4 2021-11-29 15-51-00.D  
Sample name: AC763\_291121-4  
Description: AC763 dans hexane, colonne IC, hexane/DCM 85:15, 1 mL/min, 42 bar, 220, 235 nm, 22°C, 5 µL  
Sample amount: 1.000 Sample type: Sample  
Instrument: Location: Vial 2  
Injection date: 11/29/2021 3:52:33 PM Injection: 1 of 1  
Acq. method: COELHO\_IC\_HEX-DCM\_50-50.M Injection volume:  
Analysis method: Acq. operator: SYSTEM  
Last changed: 11/29/2021 3:48:50 PM  
(modified after loading)

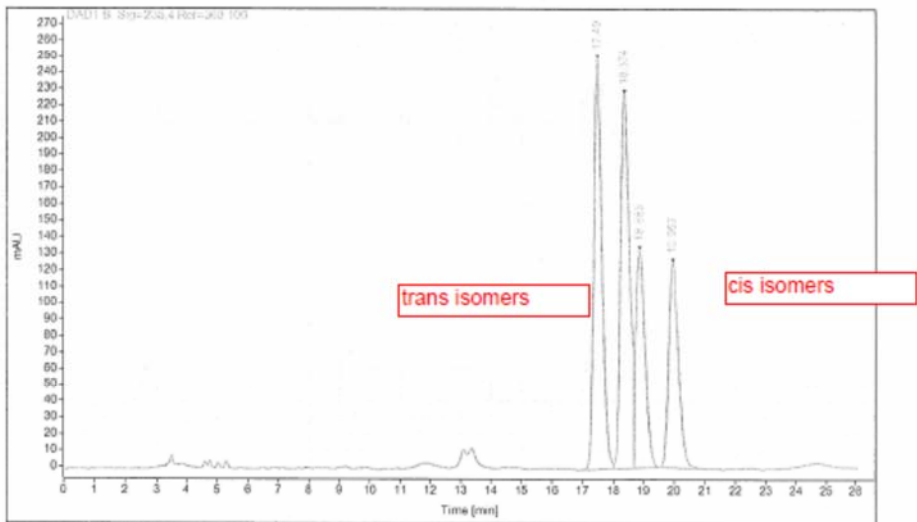

Signal: DAD1 B, Sig=235,4 Ref=360,100

| RT [min] | Area % | Plates | Symm. | Resolution |
|----------|--------|--------|-------|------------|
| 17.49    | 31.45  | 20327  | 0.64  |            |
| 18.37    | 30.49  | 17879  | 0.65  | 1.70       |
| 18.88    | 19.31  | 13153  | 0.72  | 0.85       |
| 19.96    | 18.75  | 18892  | 0.66  | 1.74       |

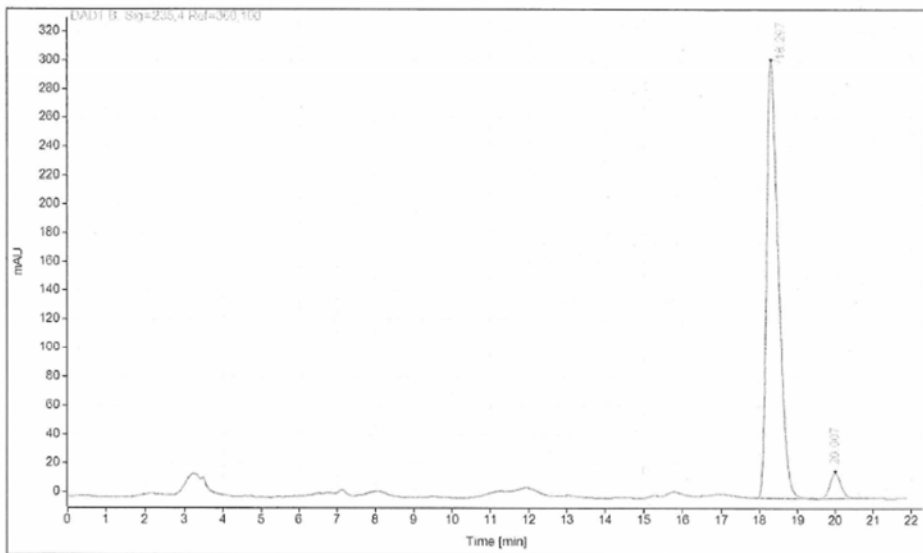

Signal: DAD1 B, Sig=235,4 Ref=360,100

| RT [min] | Area % | Plates | Symm. | Resolution |
|----------|--------|--------|-------|------------|
| 18.30    | 94.80  | 17086  | 0.52  |            |
| 20.01    | 5.202  | 22102  | 0.90  | 3.12       |

# Tert-Butyl 3-(ferrocenyl)hex-5-enoate S1

AC778F1DMSO,10.fid  
(500.28 MHz, CDCl<sub>3</sub>)

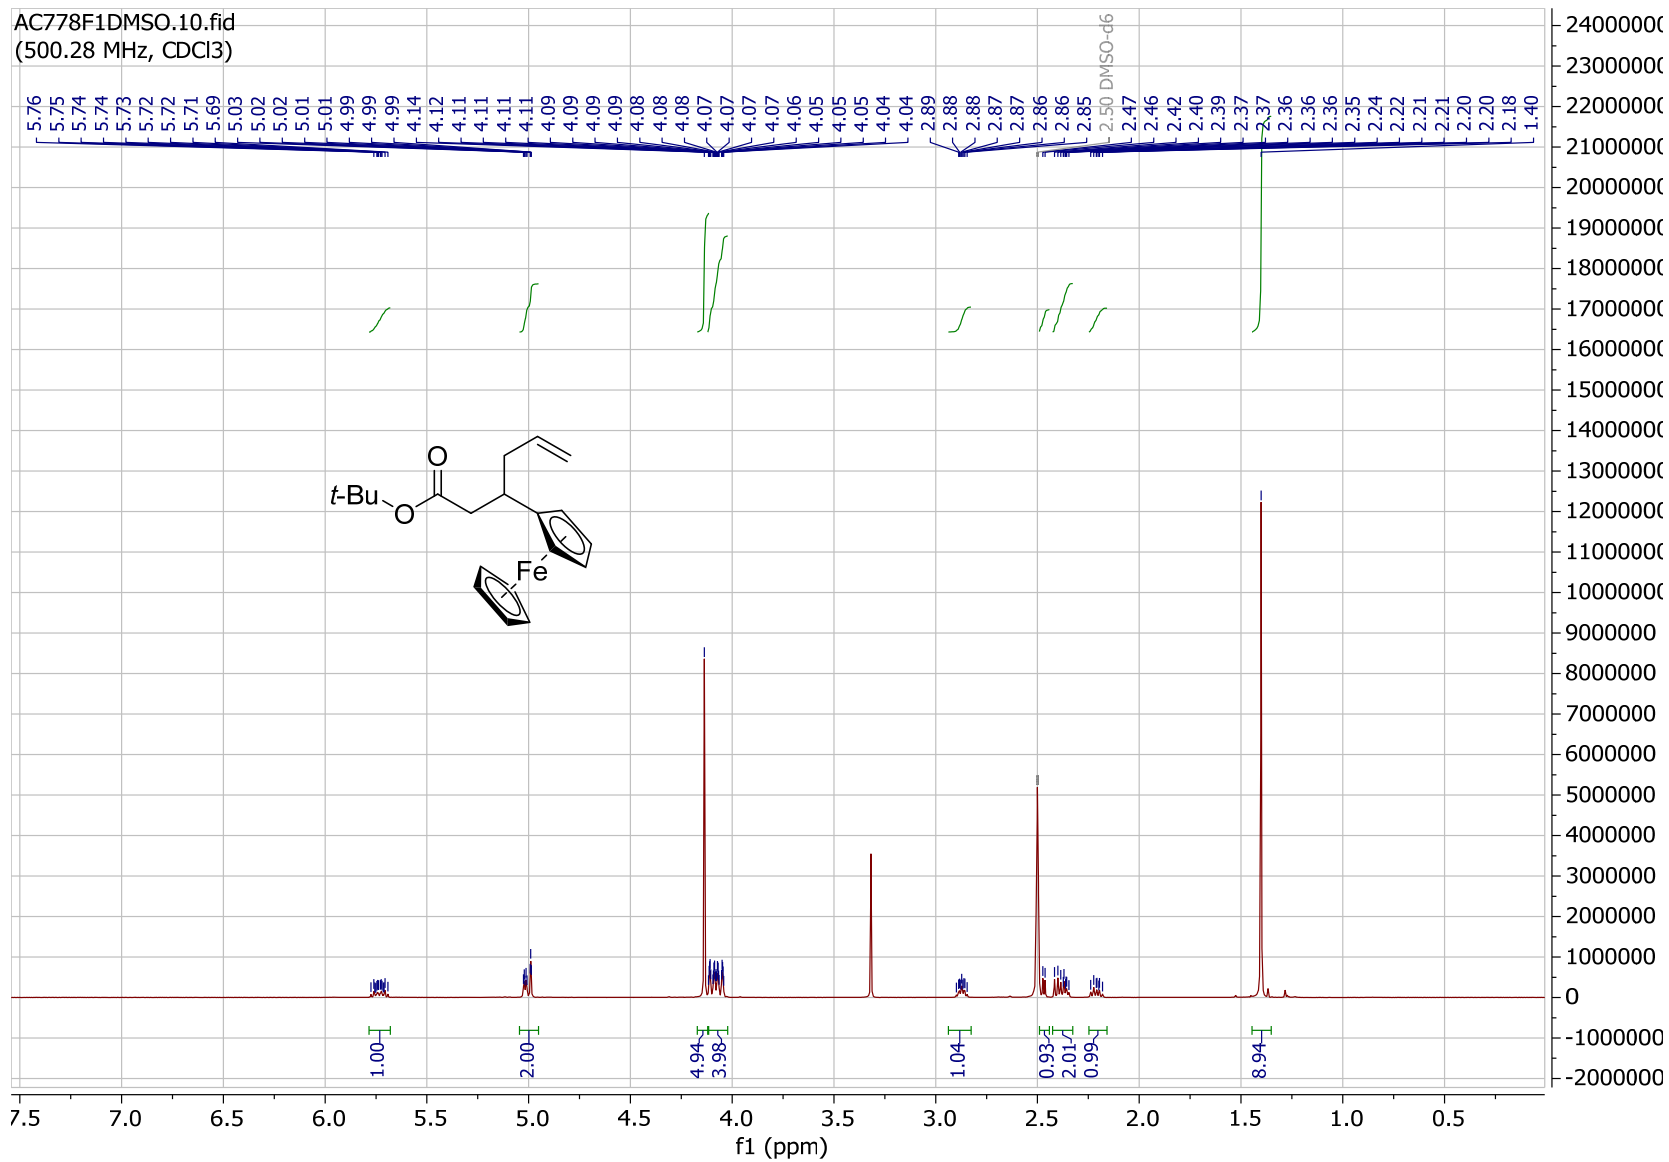

AC778F1DMSO.11.fid  
(125.81 MHz, CDCl3)

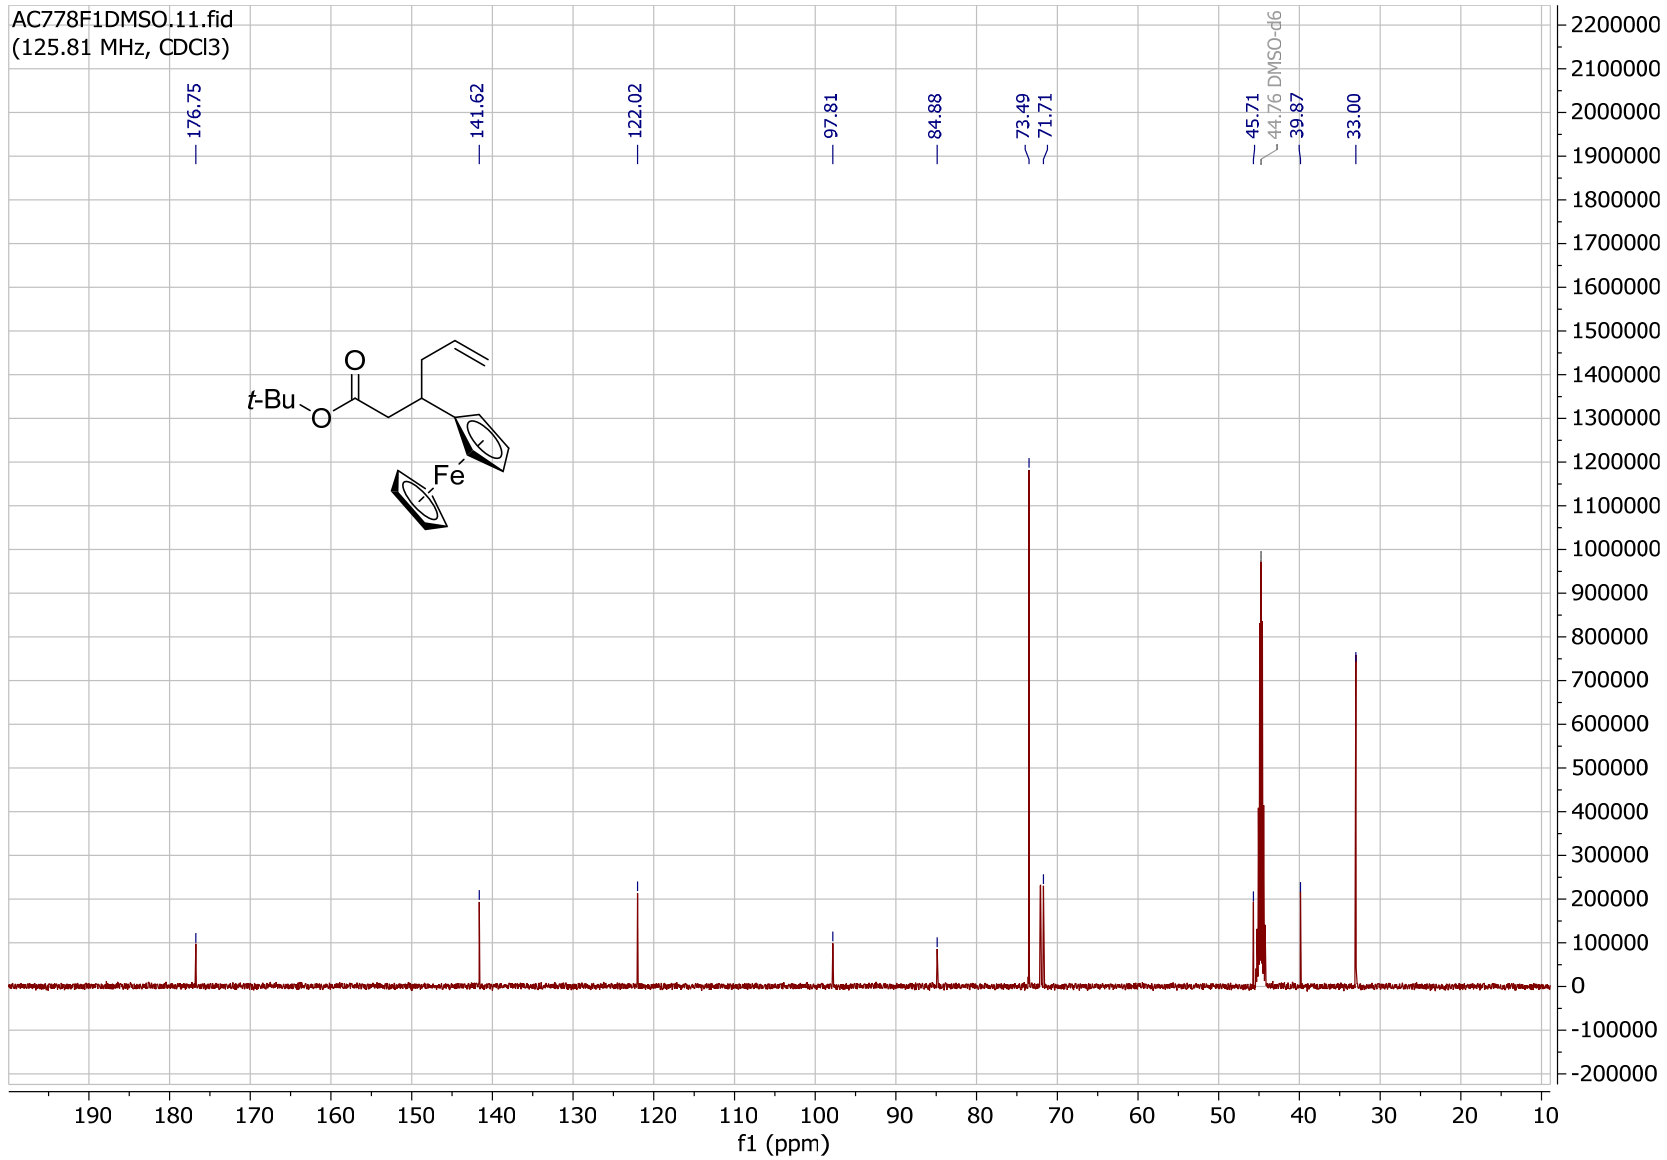

# Tert-Butyl 3-(2-bromophenyl)hex-5-enoate S2

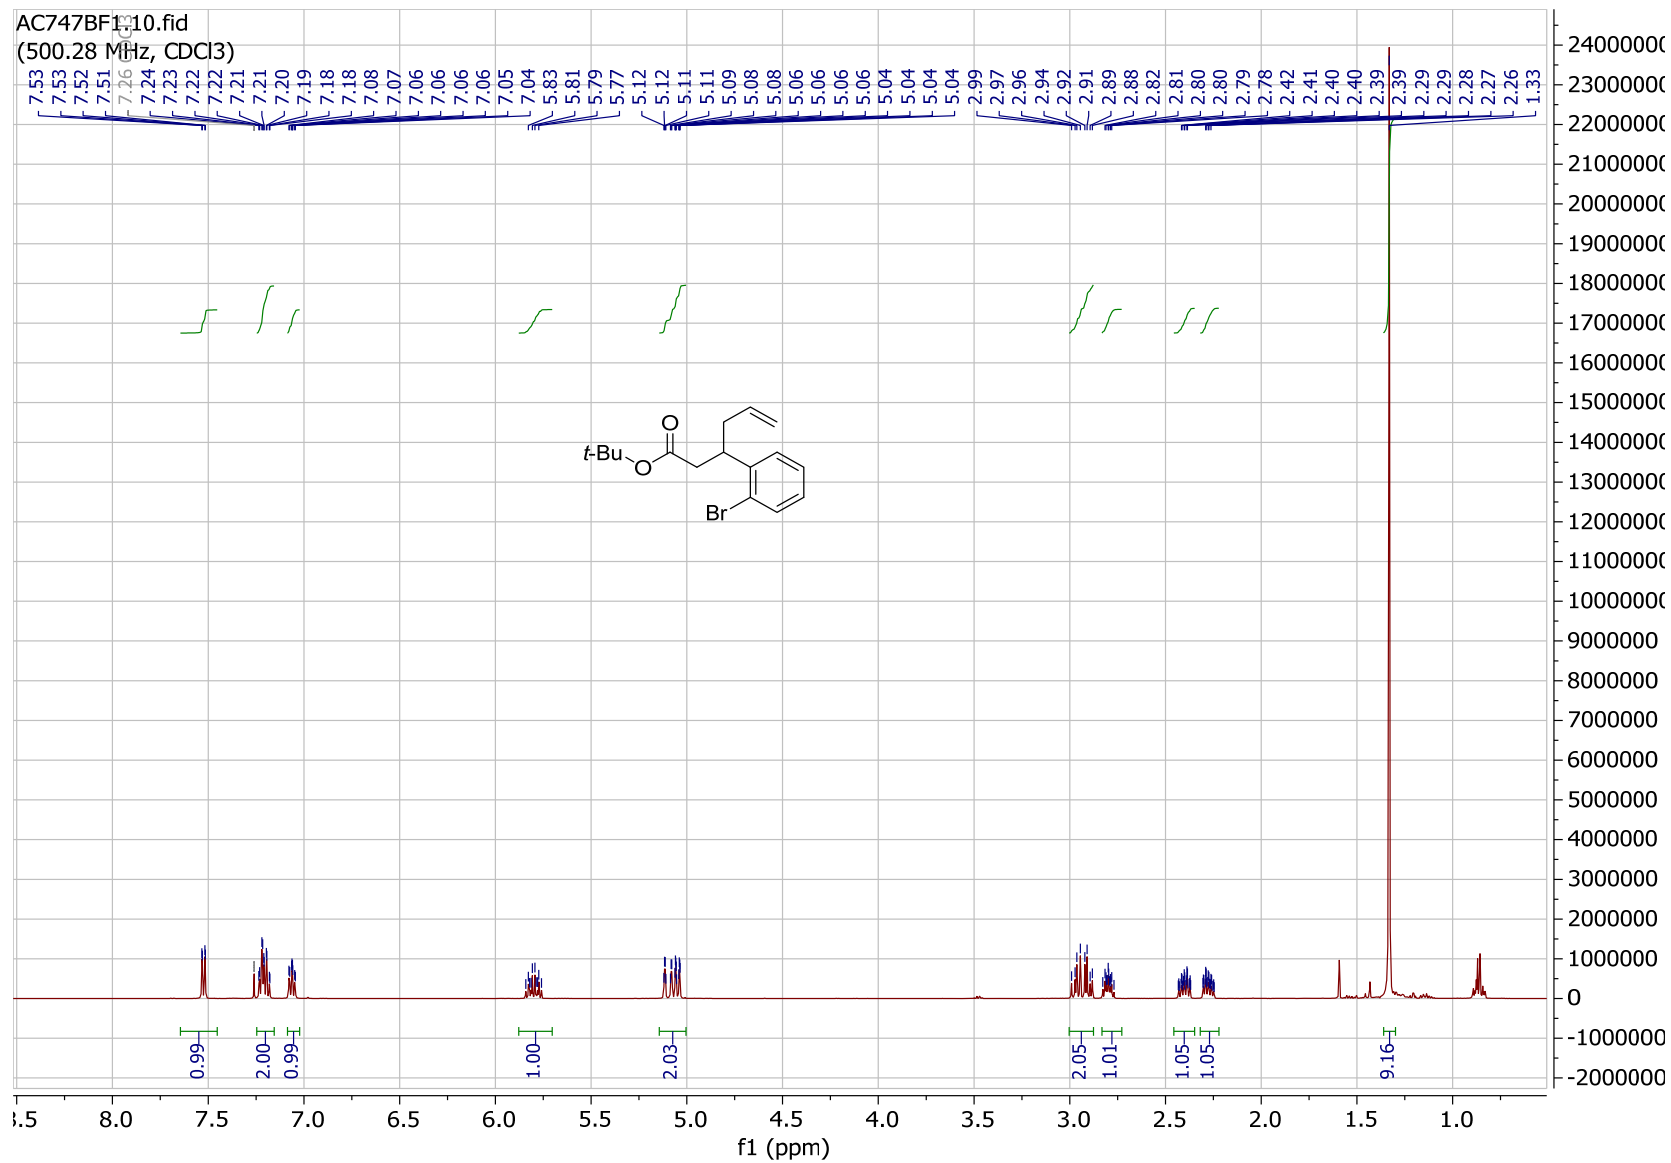

AC747BF1.11.fid  
(125.81 MHz, CDCl<sub>3</sub>)

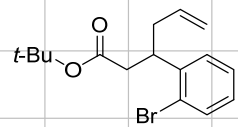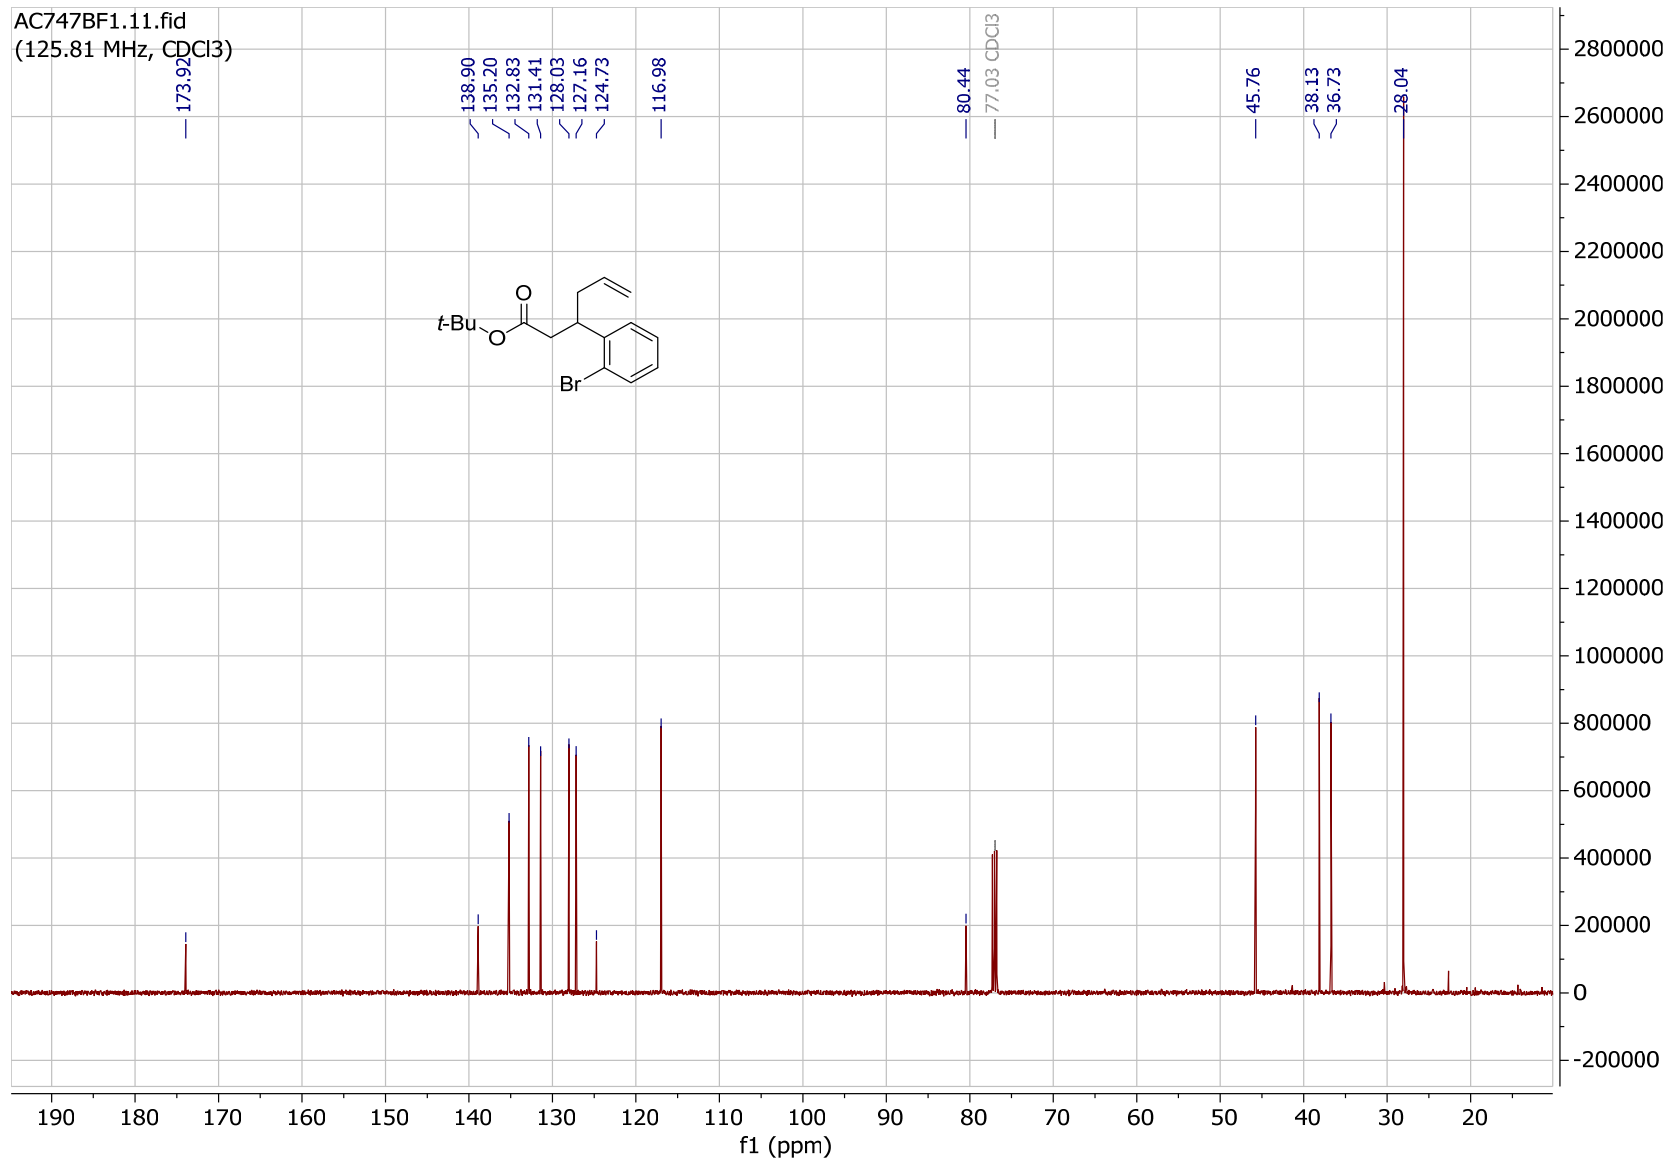

**(E)-3-[3-(Naphthalen-1-yl)acryloyl]oxazolidin-2-one S3**

AC707F1.10.fid  
(500.28 MHz, CDCl<sub>3</sub>)

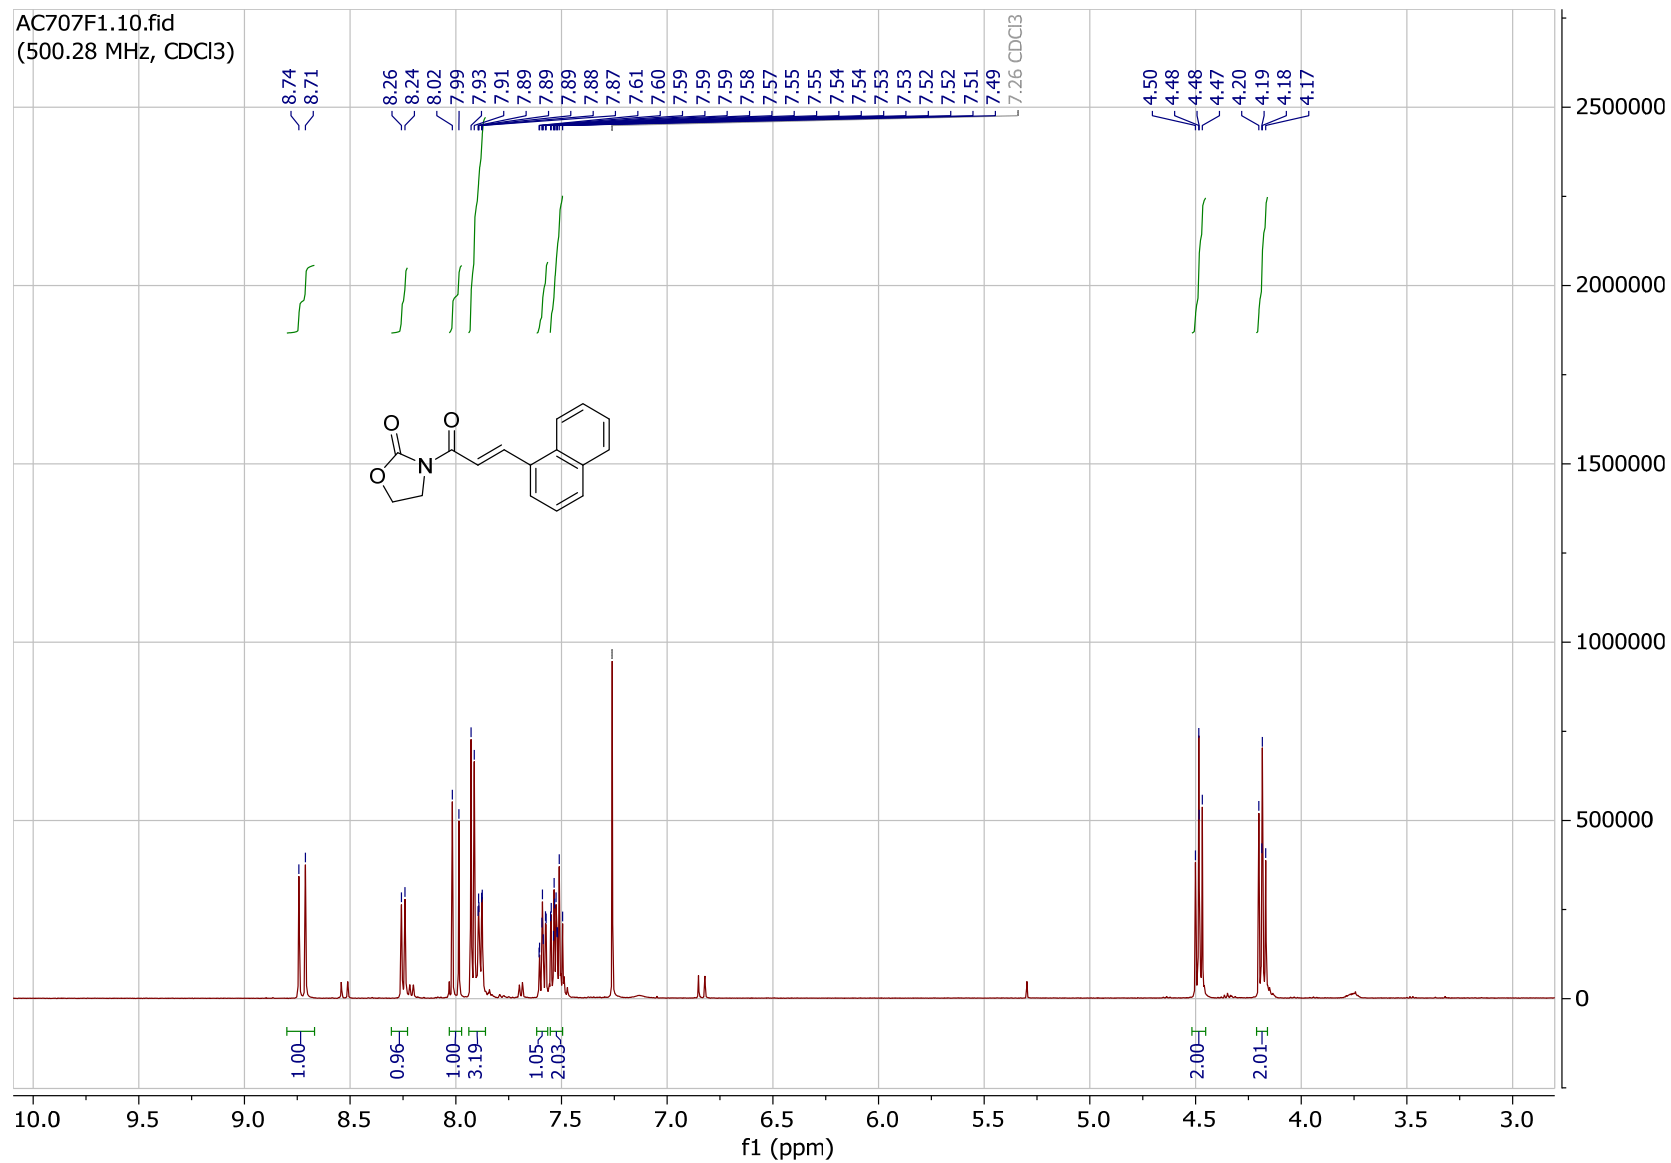

8.74  
8.71

8.26  
8.24  
8.02

7.99  
7.93  
7.91  
7.89  
7.89  
7.89  
7.88  
7.87  
7.61  
7.60  
7.59  
7.59  
7.58  
7.57  
7.55  
7.55  
7.54  
7.54  
7.53  
7.53  
7.52  
7.52  
7.51  
7.49  
7.26 CDCl<sub>3</sub>

4.50  
4.48  
4.47  
4.20  
4.19  
4.18  
4.17

1.00

0.96

1.00  
3.19

1.05  
2.03

2.00

2.01

AC707F1.11.fid  
(125.81 MHz, CDCl<sub>3</sub>)

165.40

153.66

143.05

131.02

128.79

126.98

126.22

125.76

125.55

123.33

119.00

77.03 CDCl<sub>3</sub>

62.15

42.89

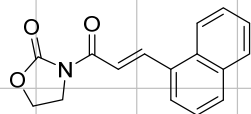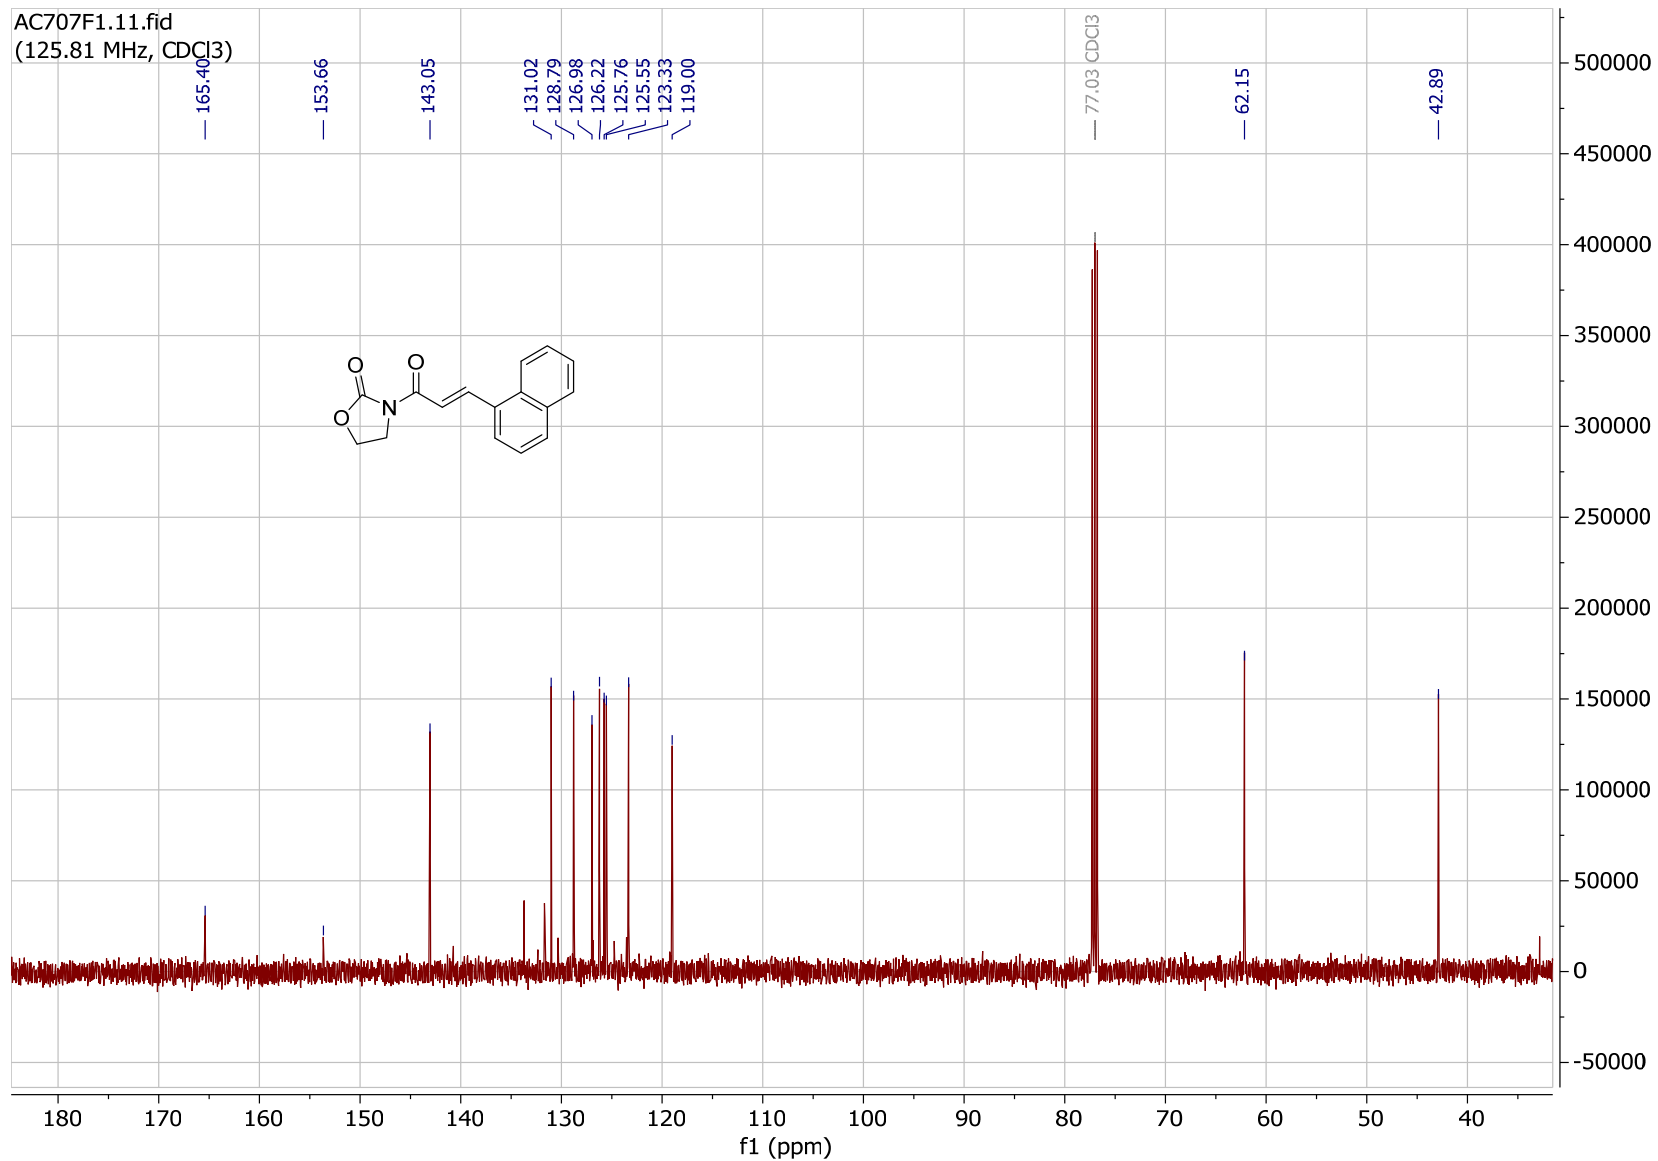

3-[(2E,6E)-4,4-Dimethyl-7-phenylhepta-2,6-dienoyl]oxazolidin-2-one S4

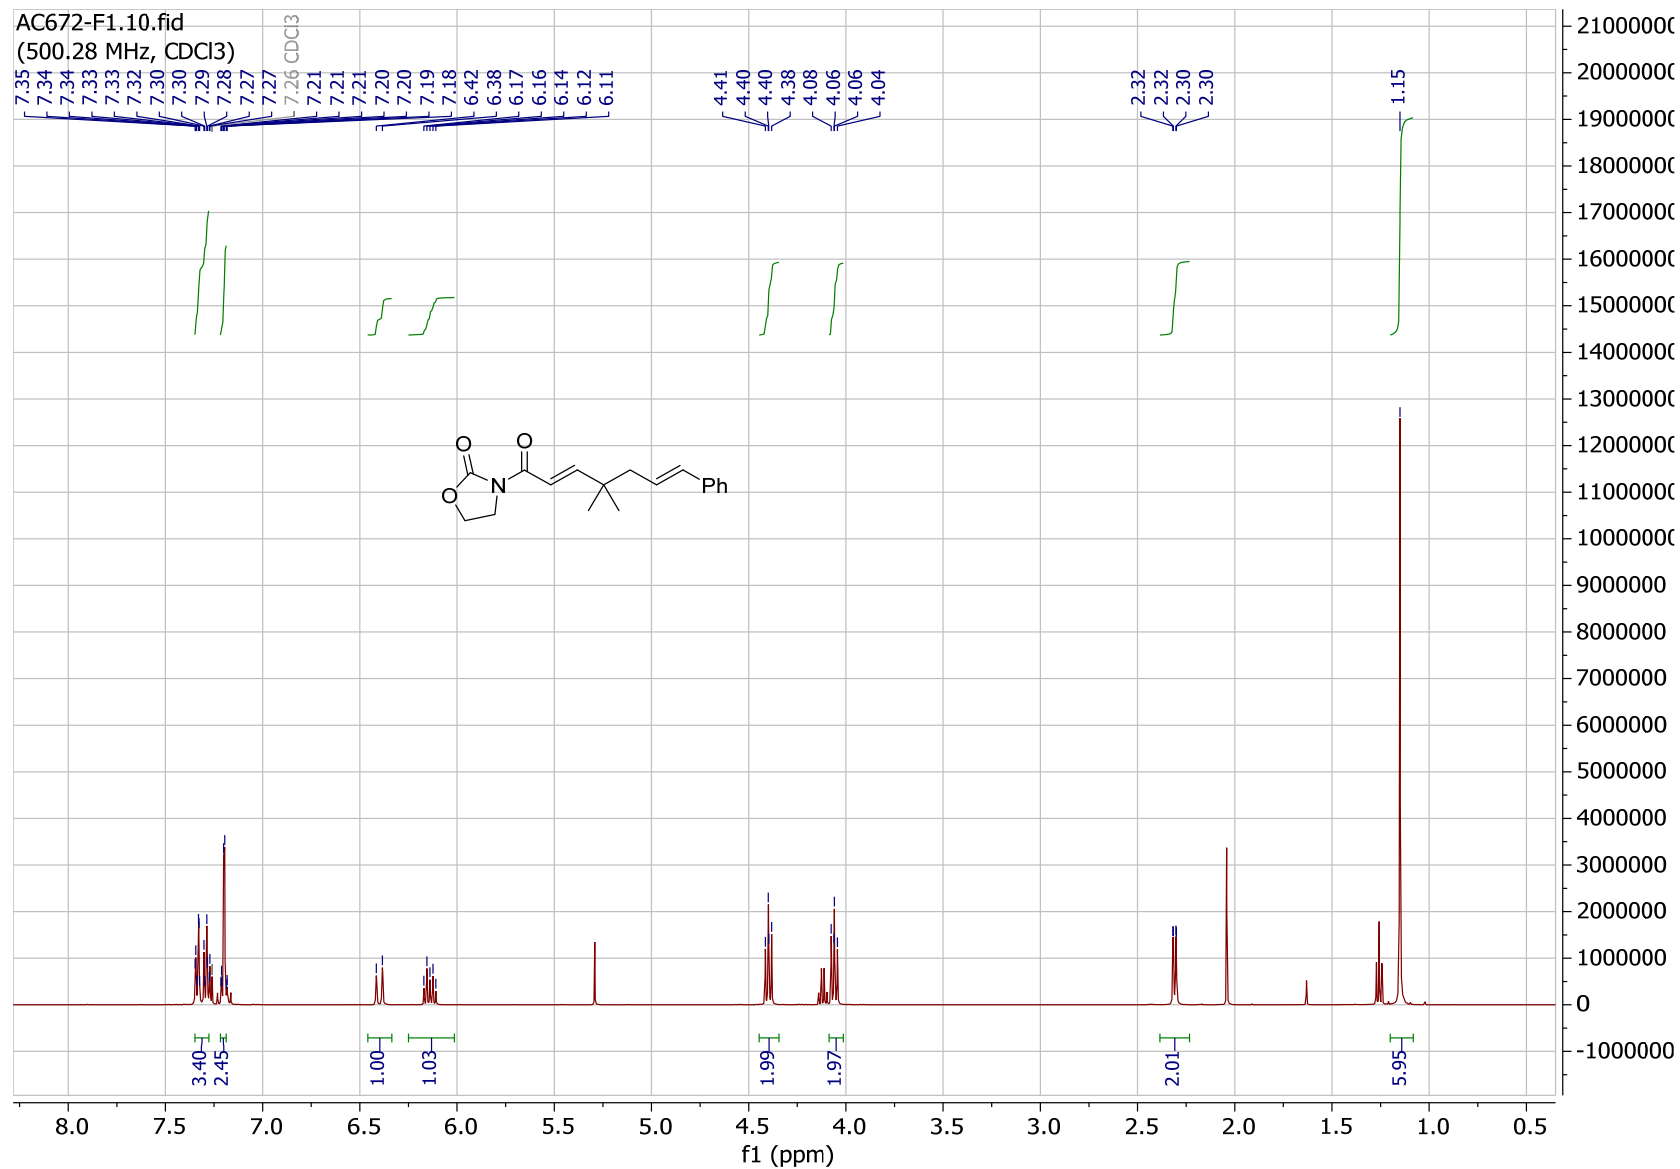



AC672-F1.11.fid  
(125.81 MHz, CDCl<sub>3</sub>)

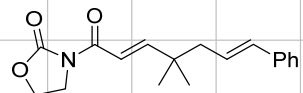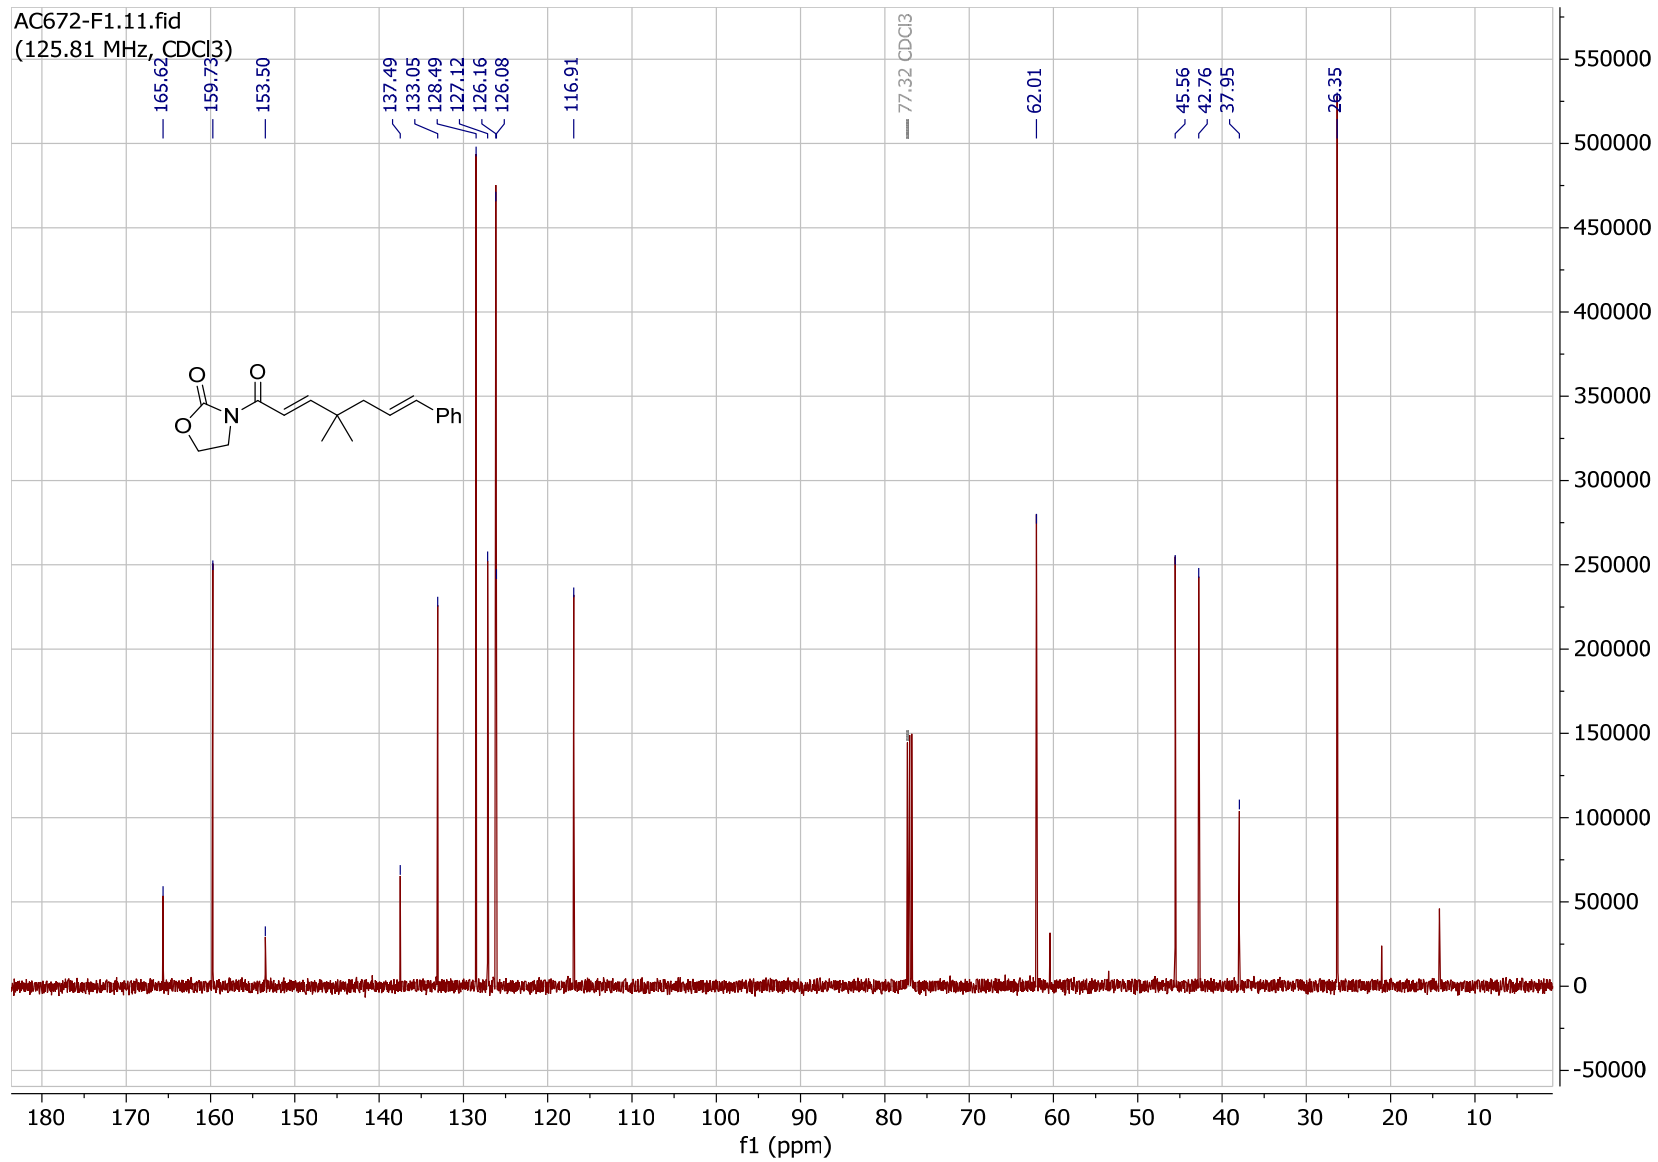

**(*R,E*)-4-Benzyl-3-[3-(thiophen-2-yl)acryloyl]oxazolidin-2-one S5**

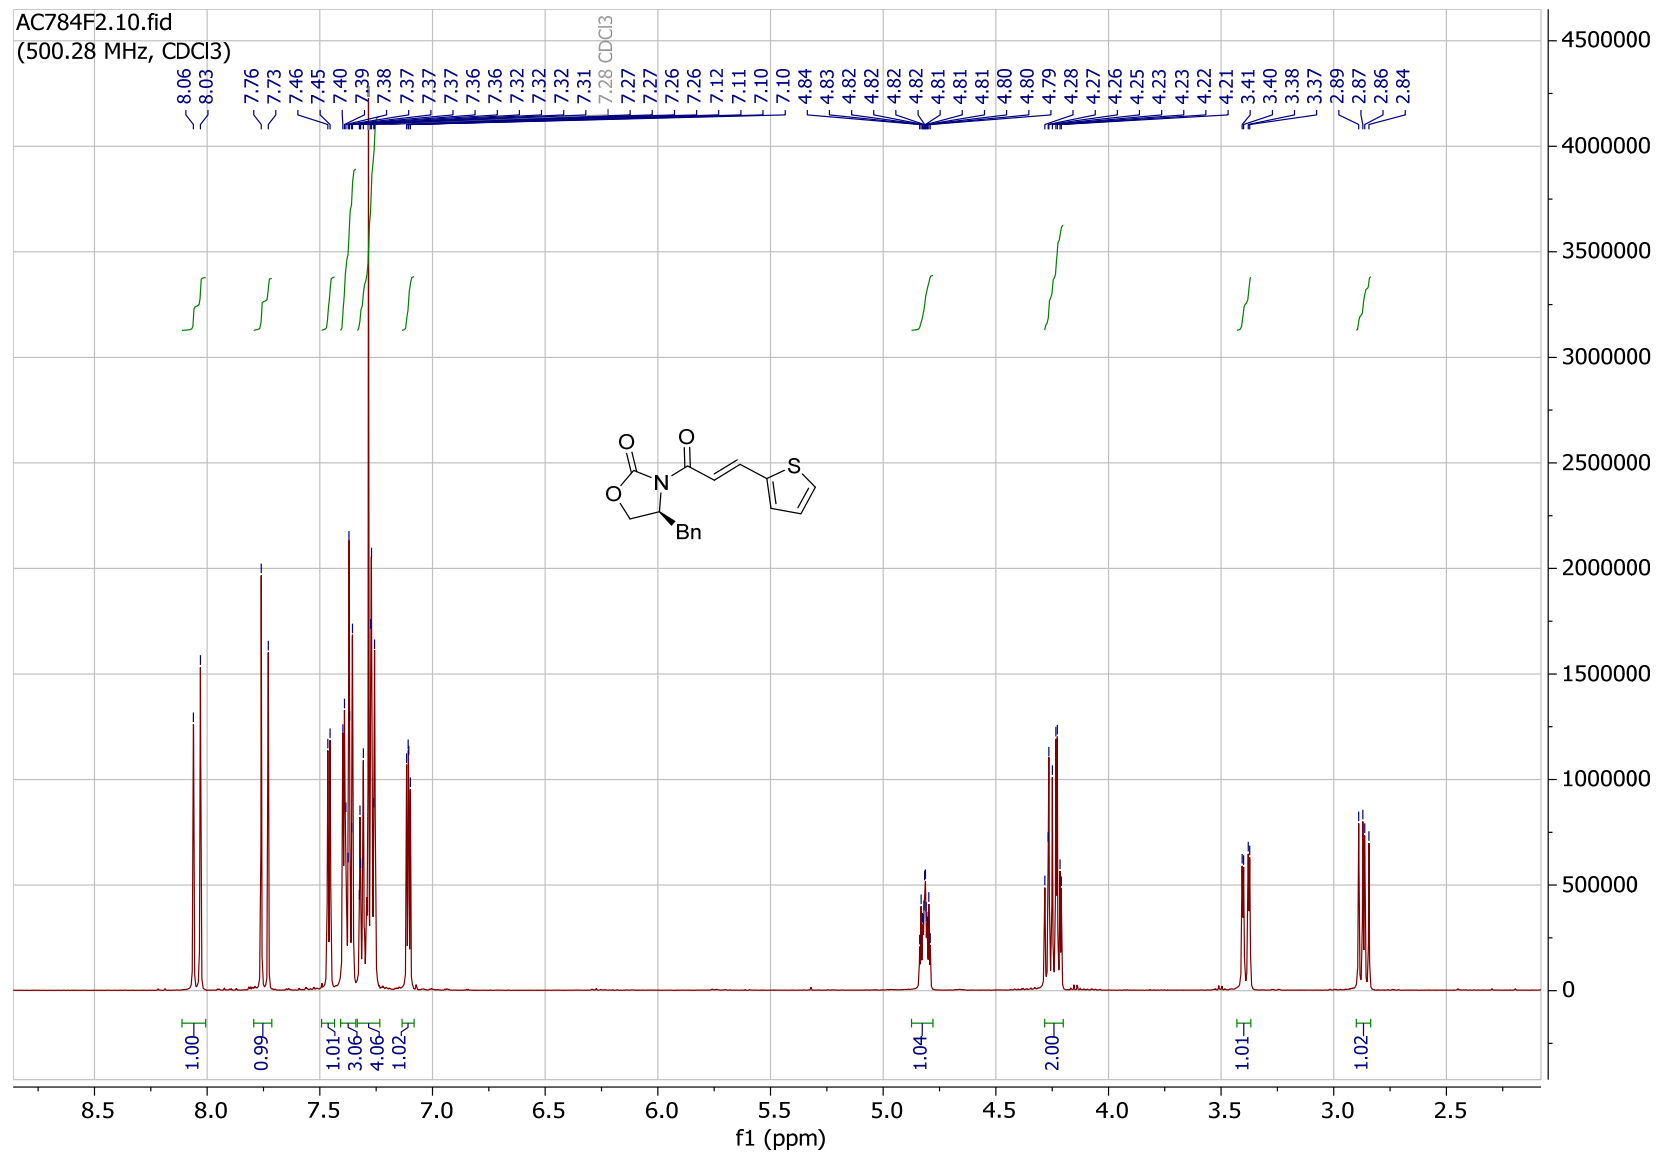

AC784F2.11.fid  
(125.81 MHz, CDCl<sub>3</sub>)

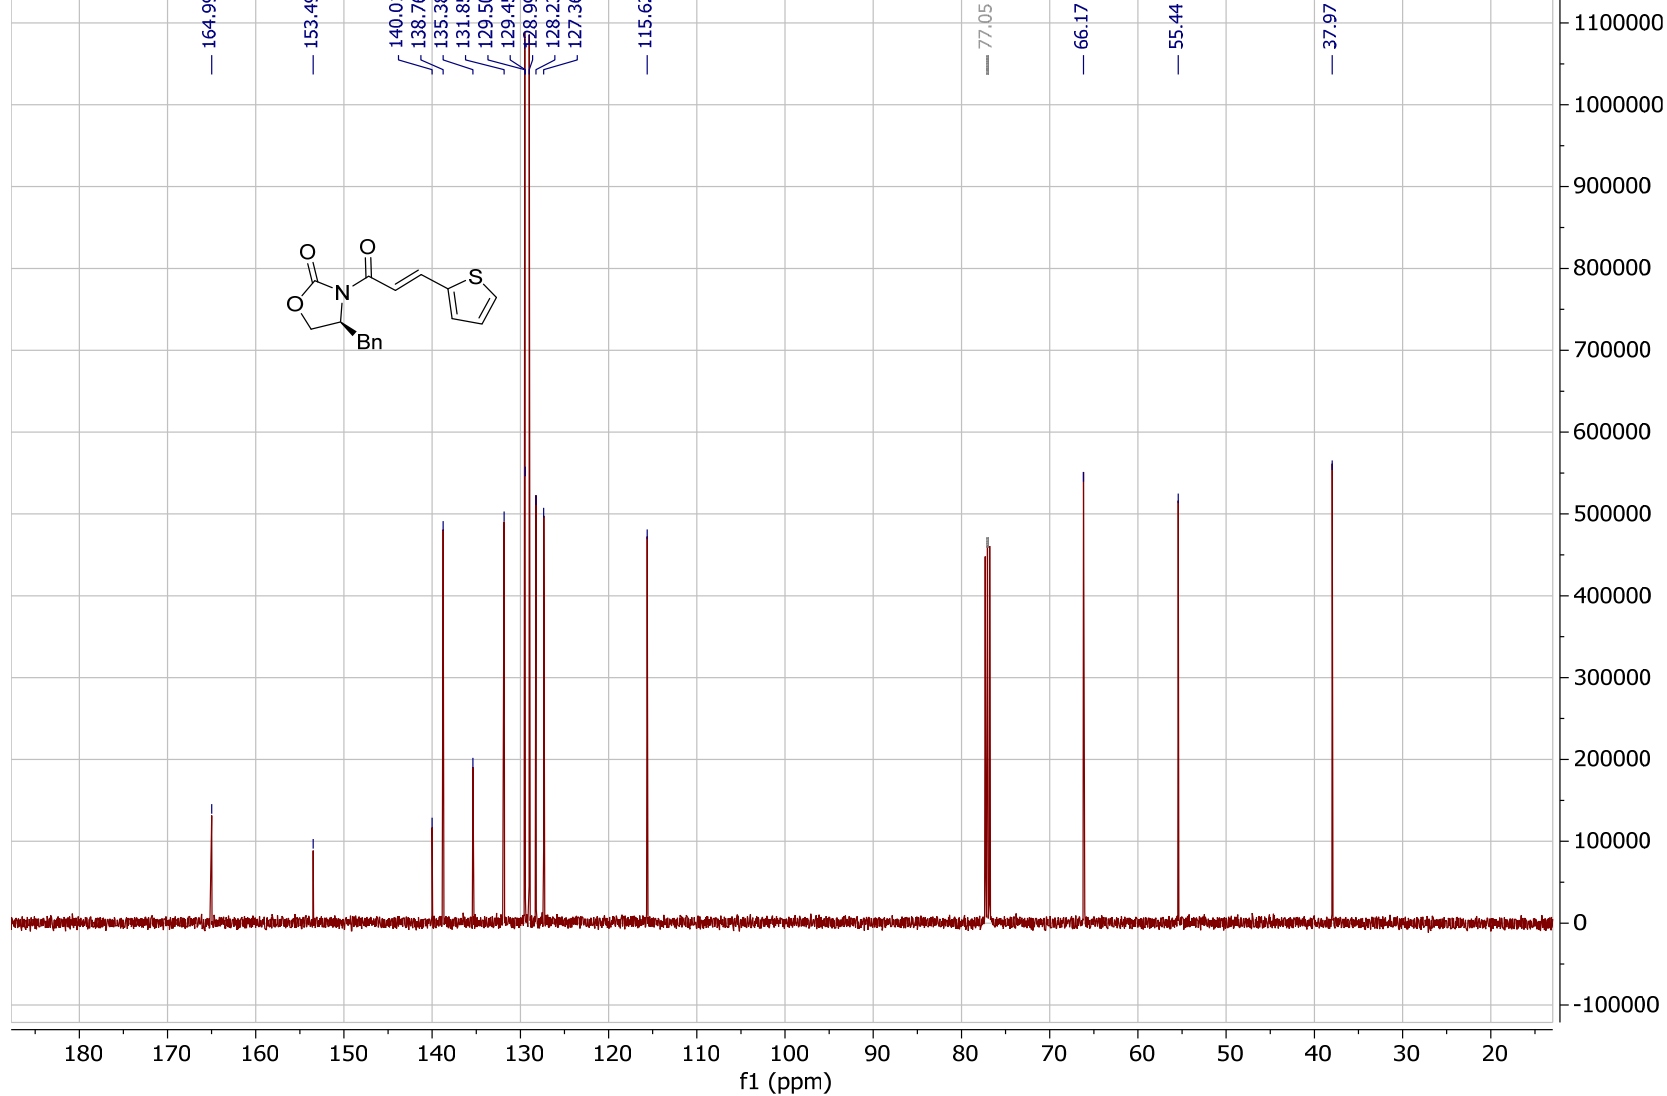

**(S)-4-Benzyl-3-[(S)-3-phenylhex-5-enoyl]oxazolidin-2-one S6**

AC641P.10.fid  
(500.28 MHz, CDCl<sub>3</sub>)

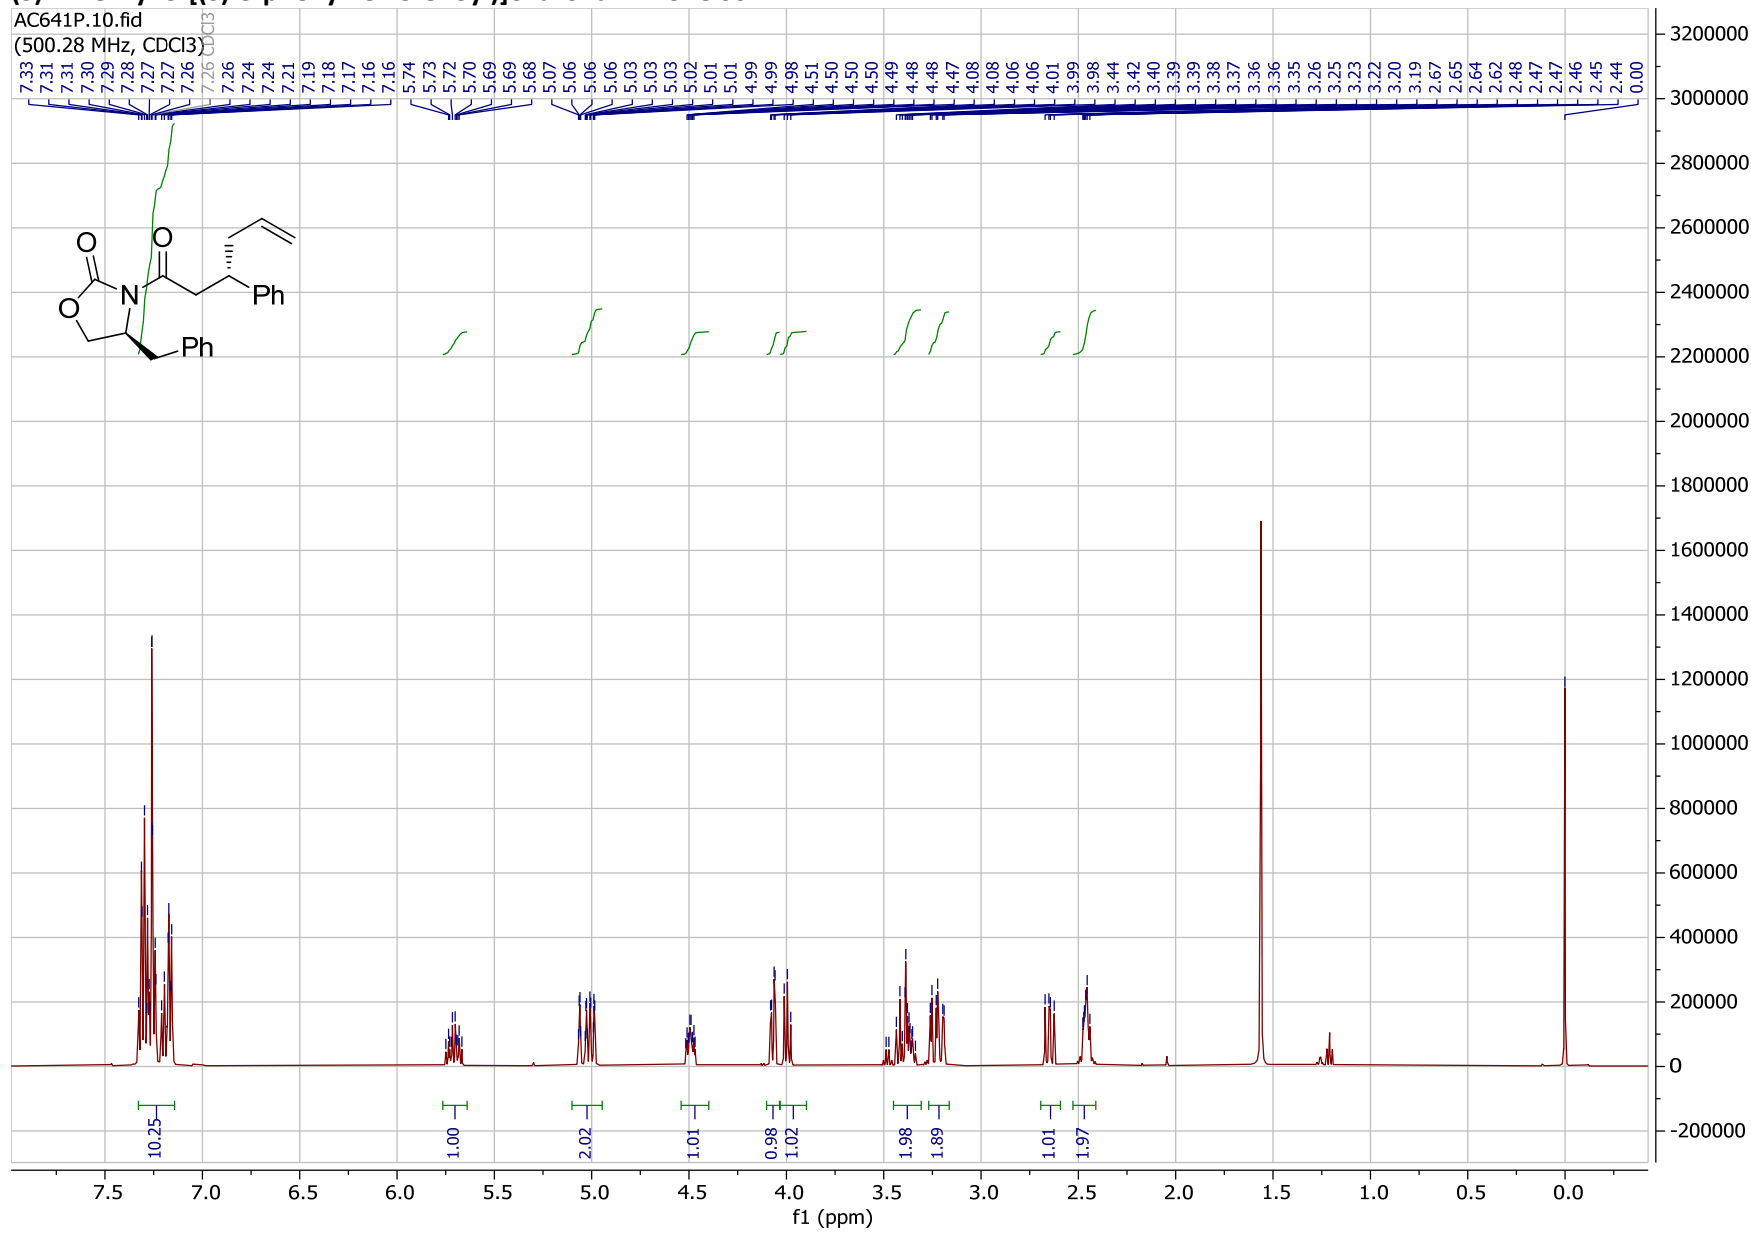

AC641P.11.fid  
(125.81 MHz, CDCl<sub>3</sub>)

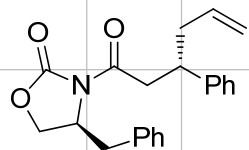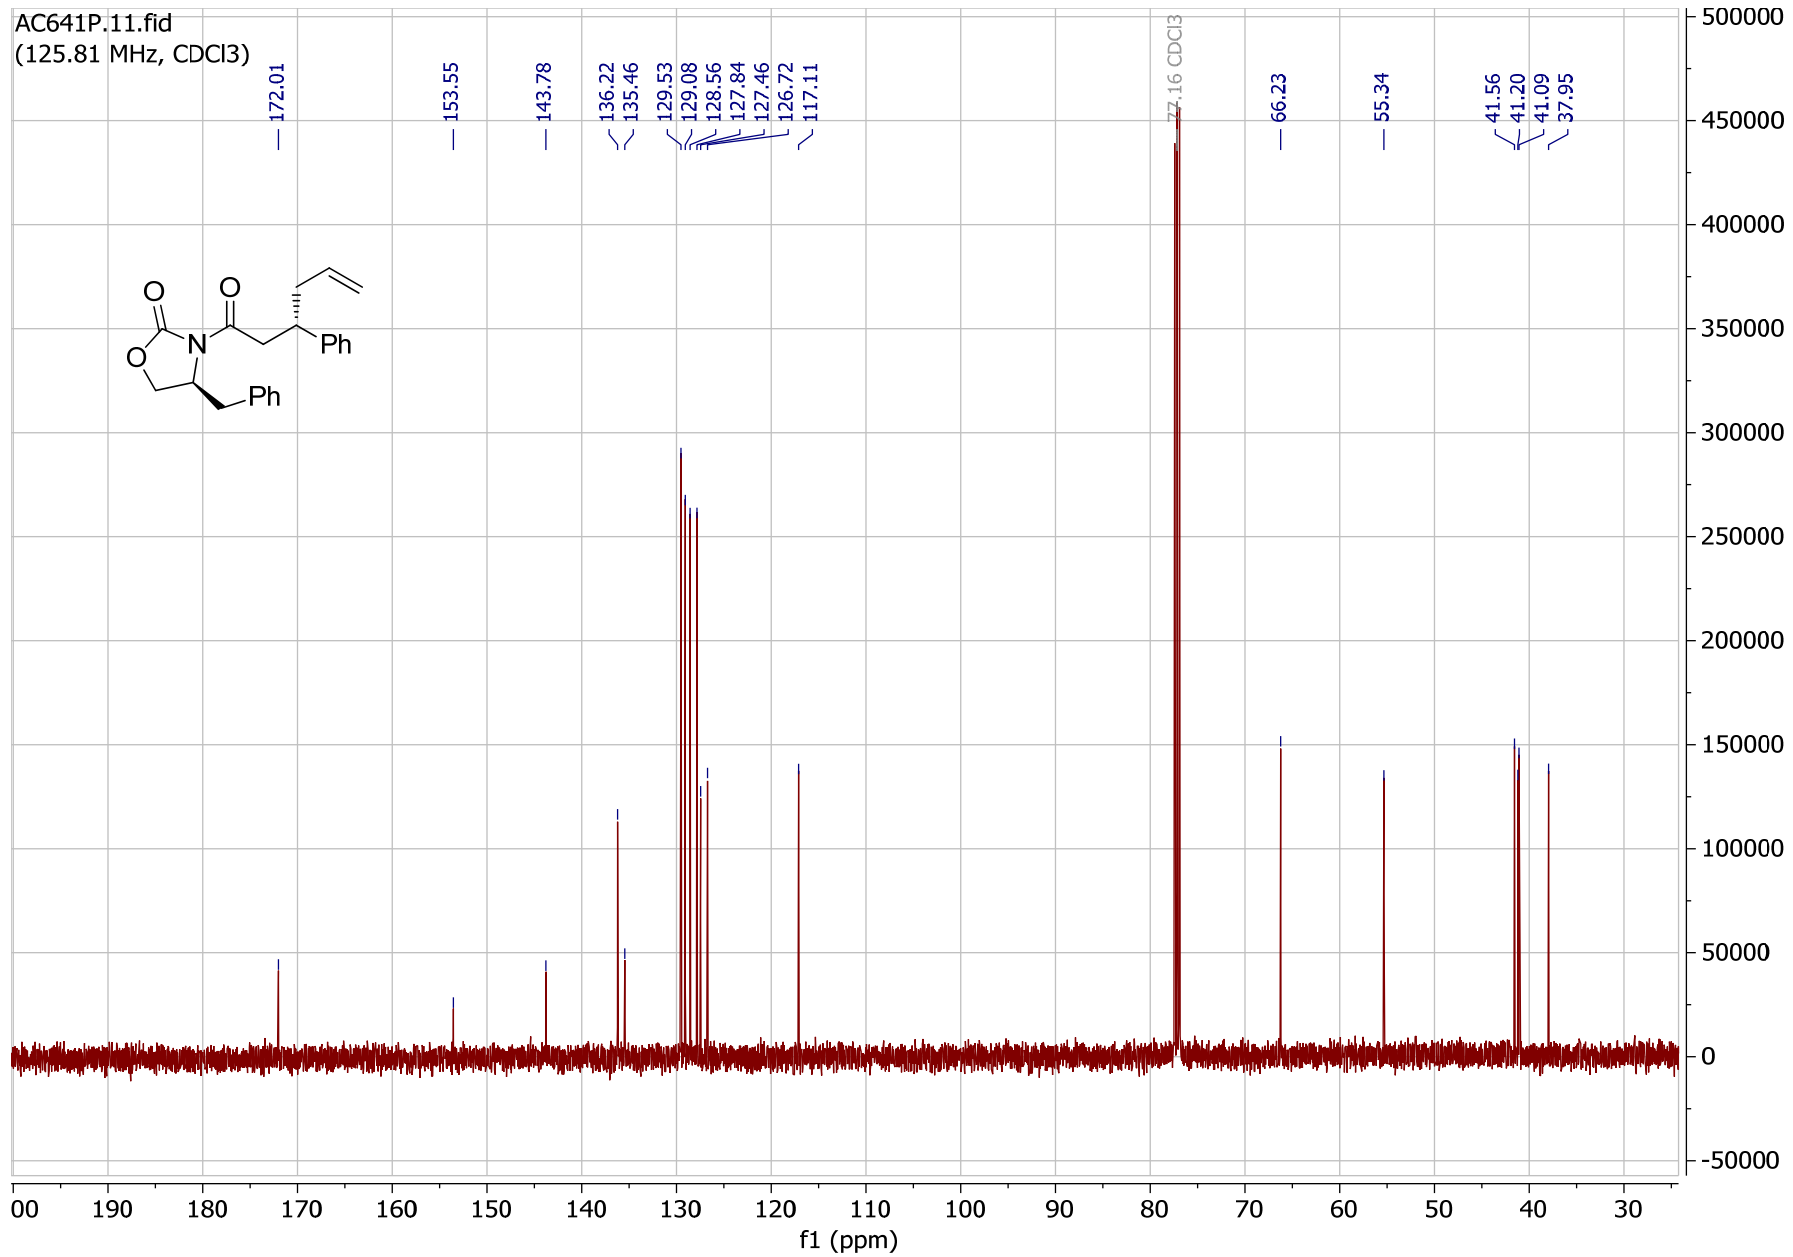

### 3-[3-(Naphthalen-1-yl)hex-5-enyl]oxazolidin-2-one S7

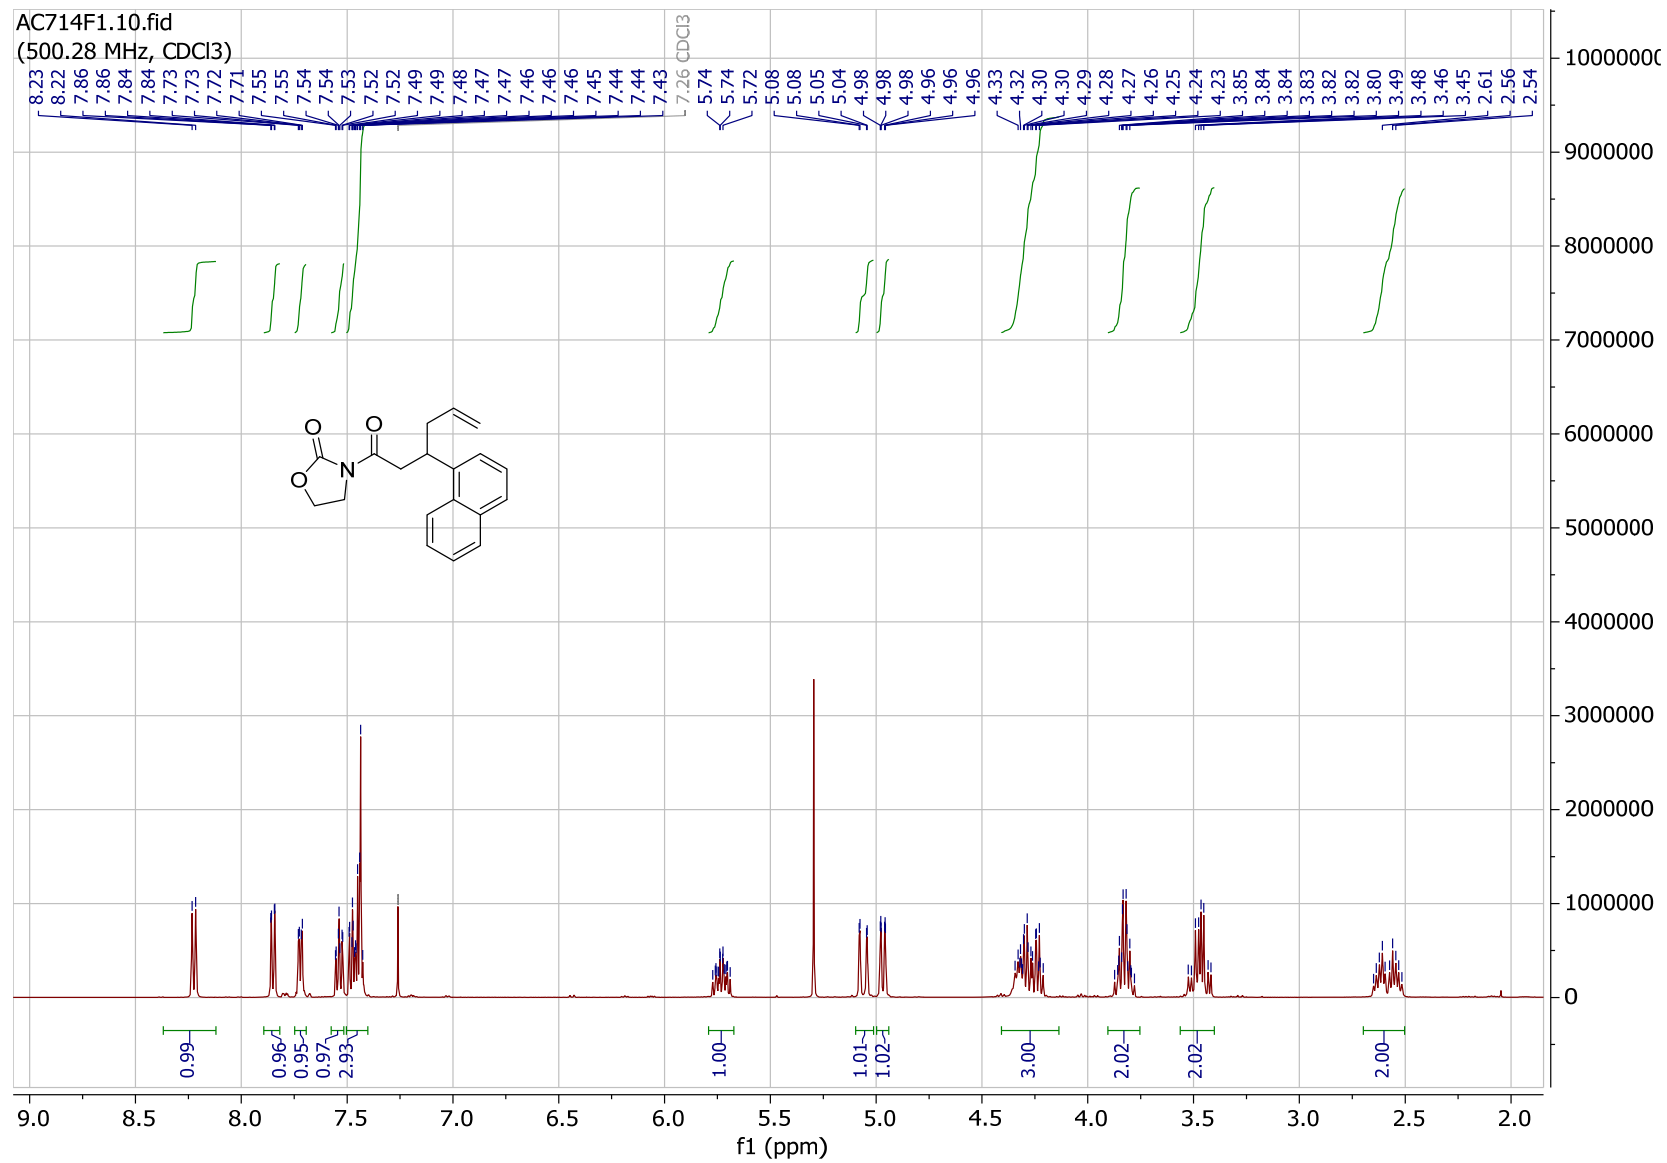

AC714F1.11.fid  
(125.81 MHz, CDCl<sub>3</sub>)

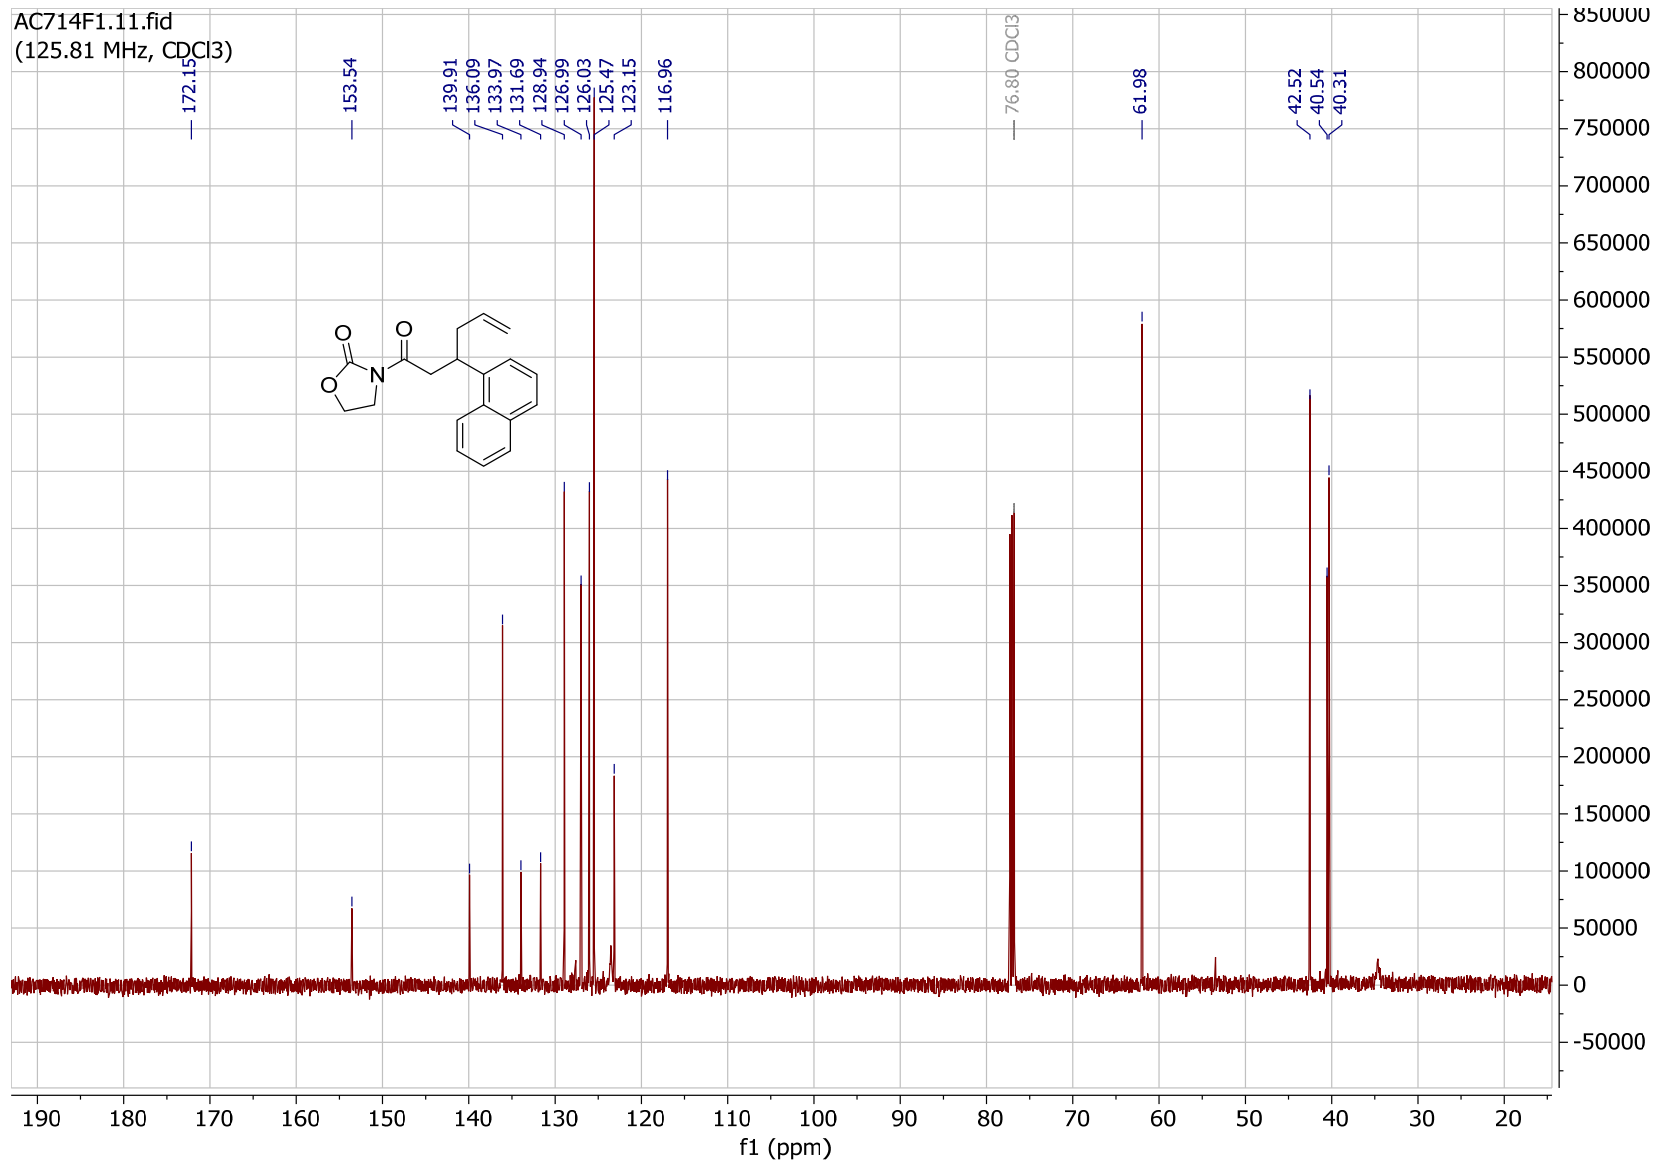

**(E)-3-(3-Allyl-4,4-dimethyl-7-phenylhept-6-enyl)oxazolidin-2-one S8**

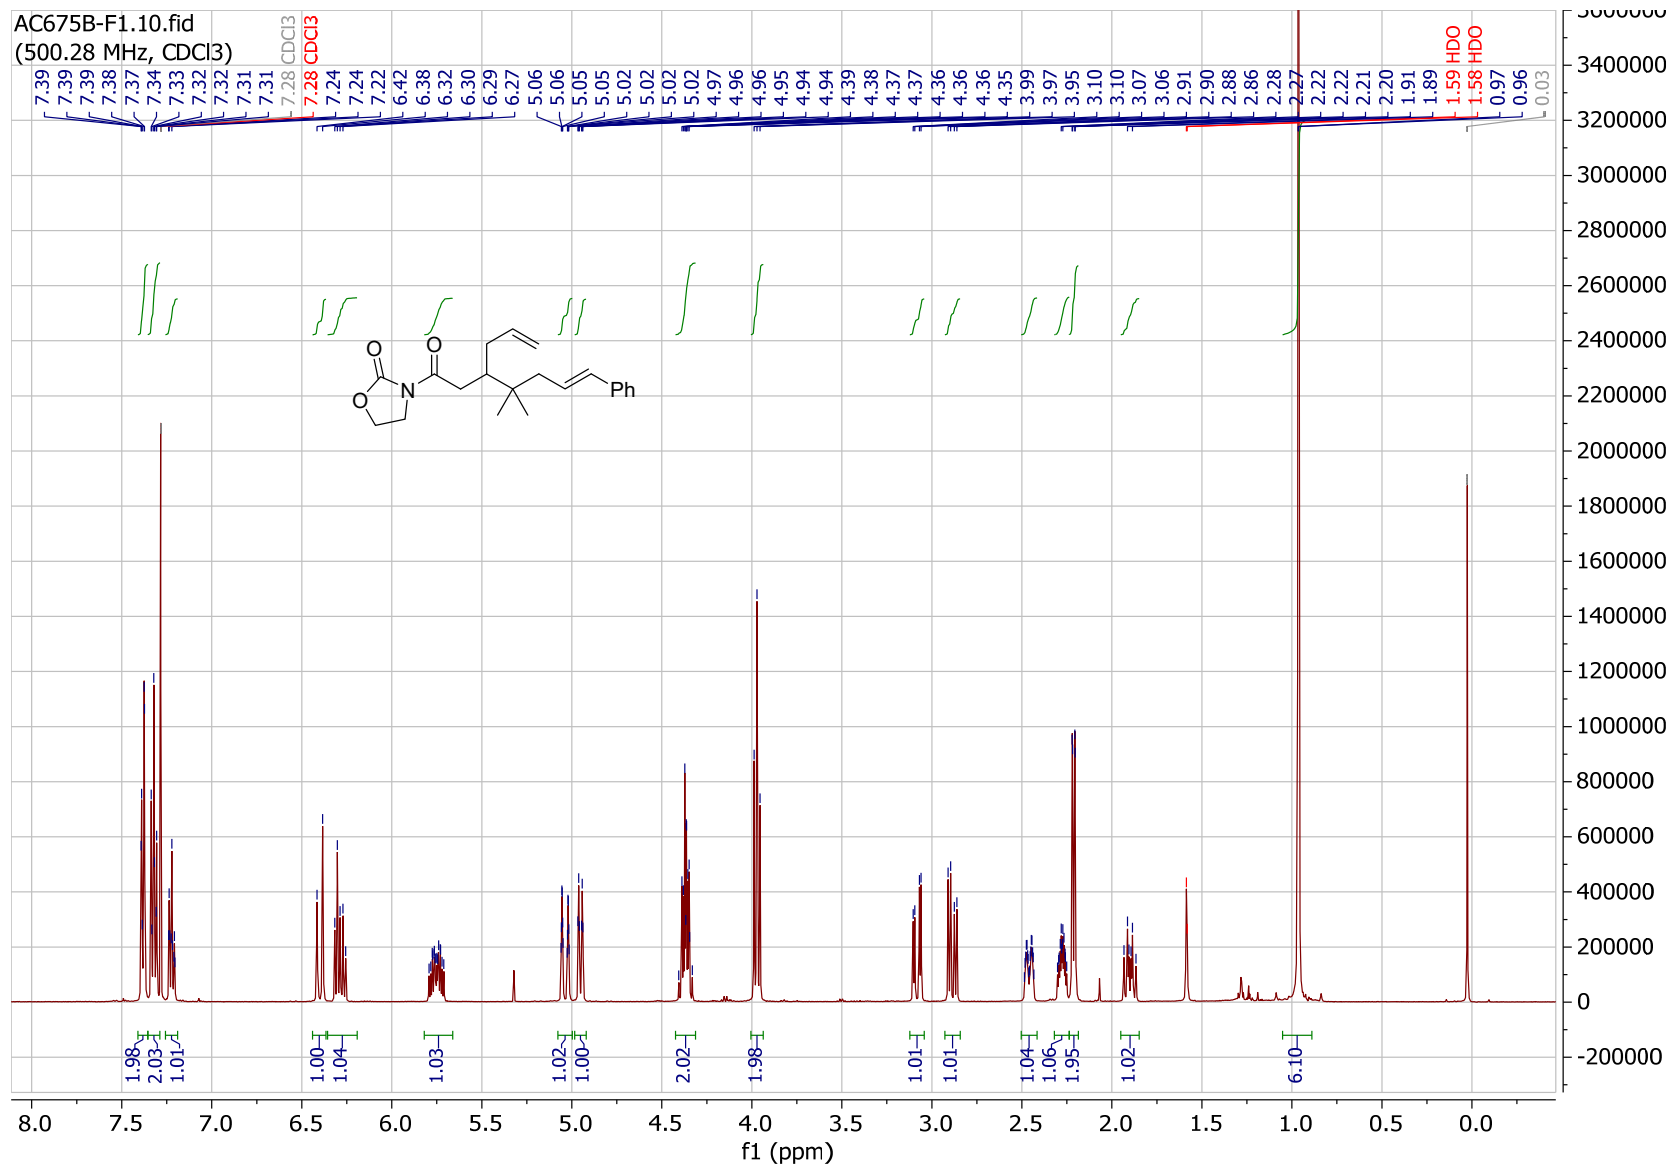



AC675B-F1.11.fid  
(125.81 MHz, CDCl3)

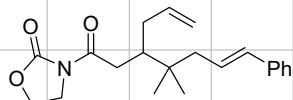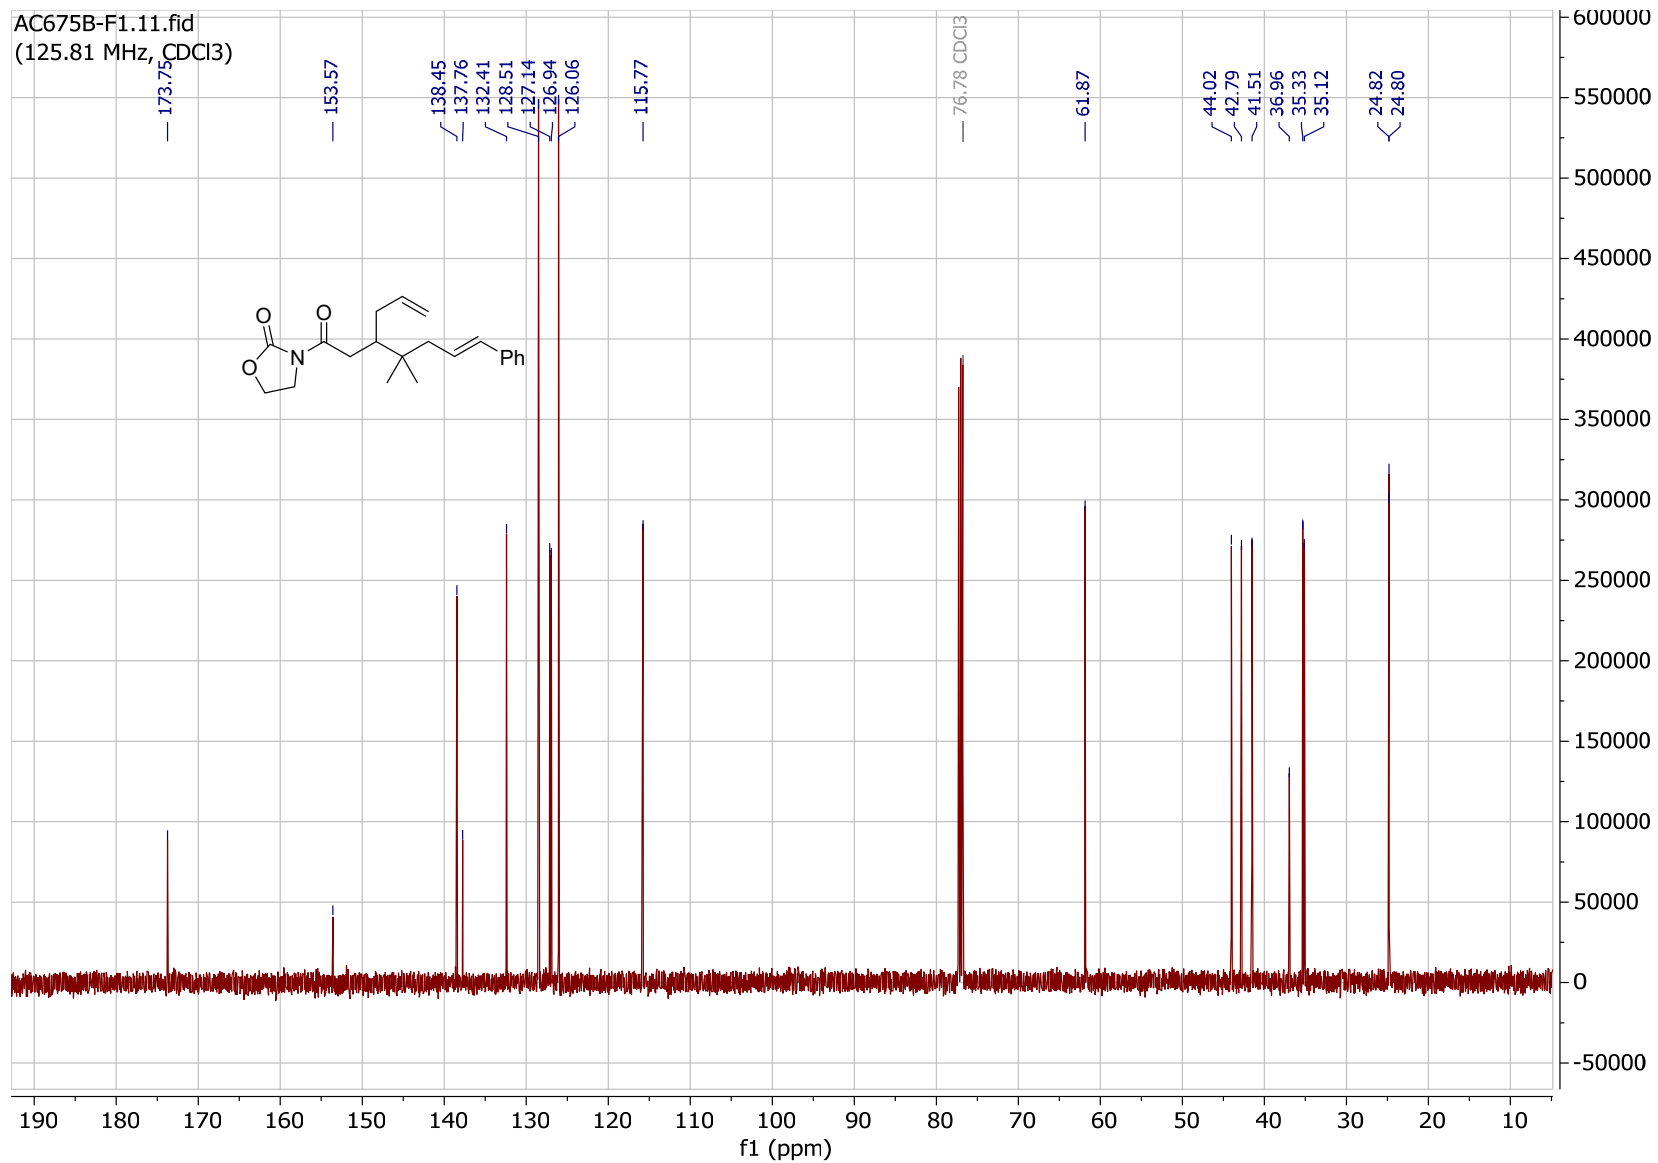

**(S)-4-Benzyl-3-[(S)-3-(thiophen-2-yl)hex-5-enyl]oxazolidin-2-one**

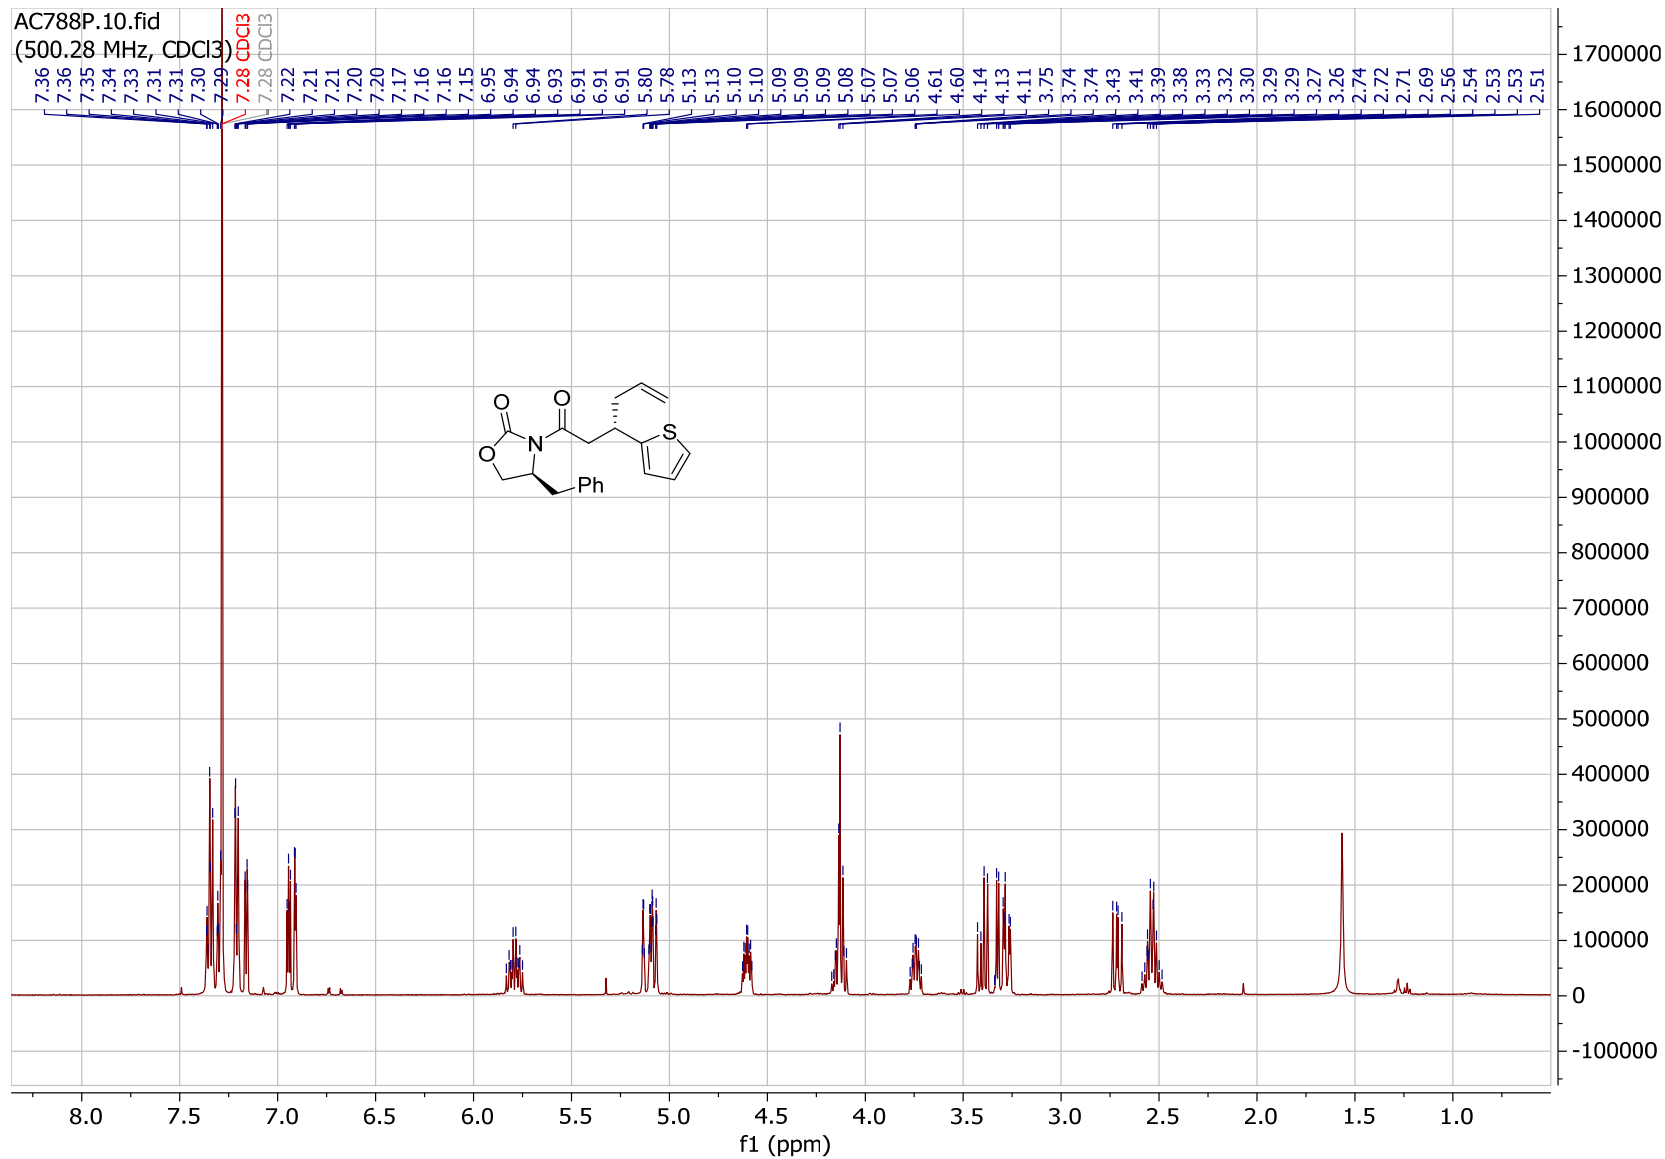

AC788P.11.fid  
(125.81 MHz, CDCl<sub>3</sub>)

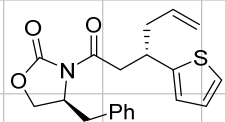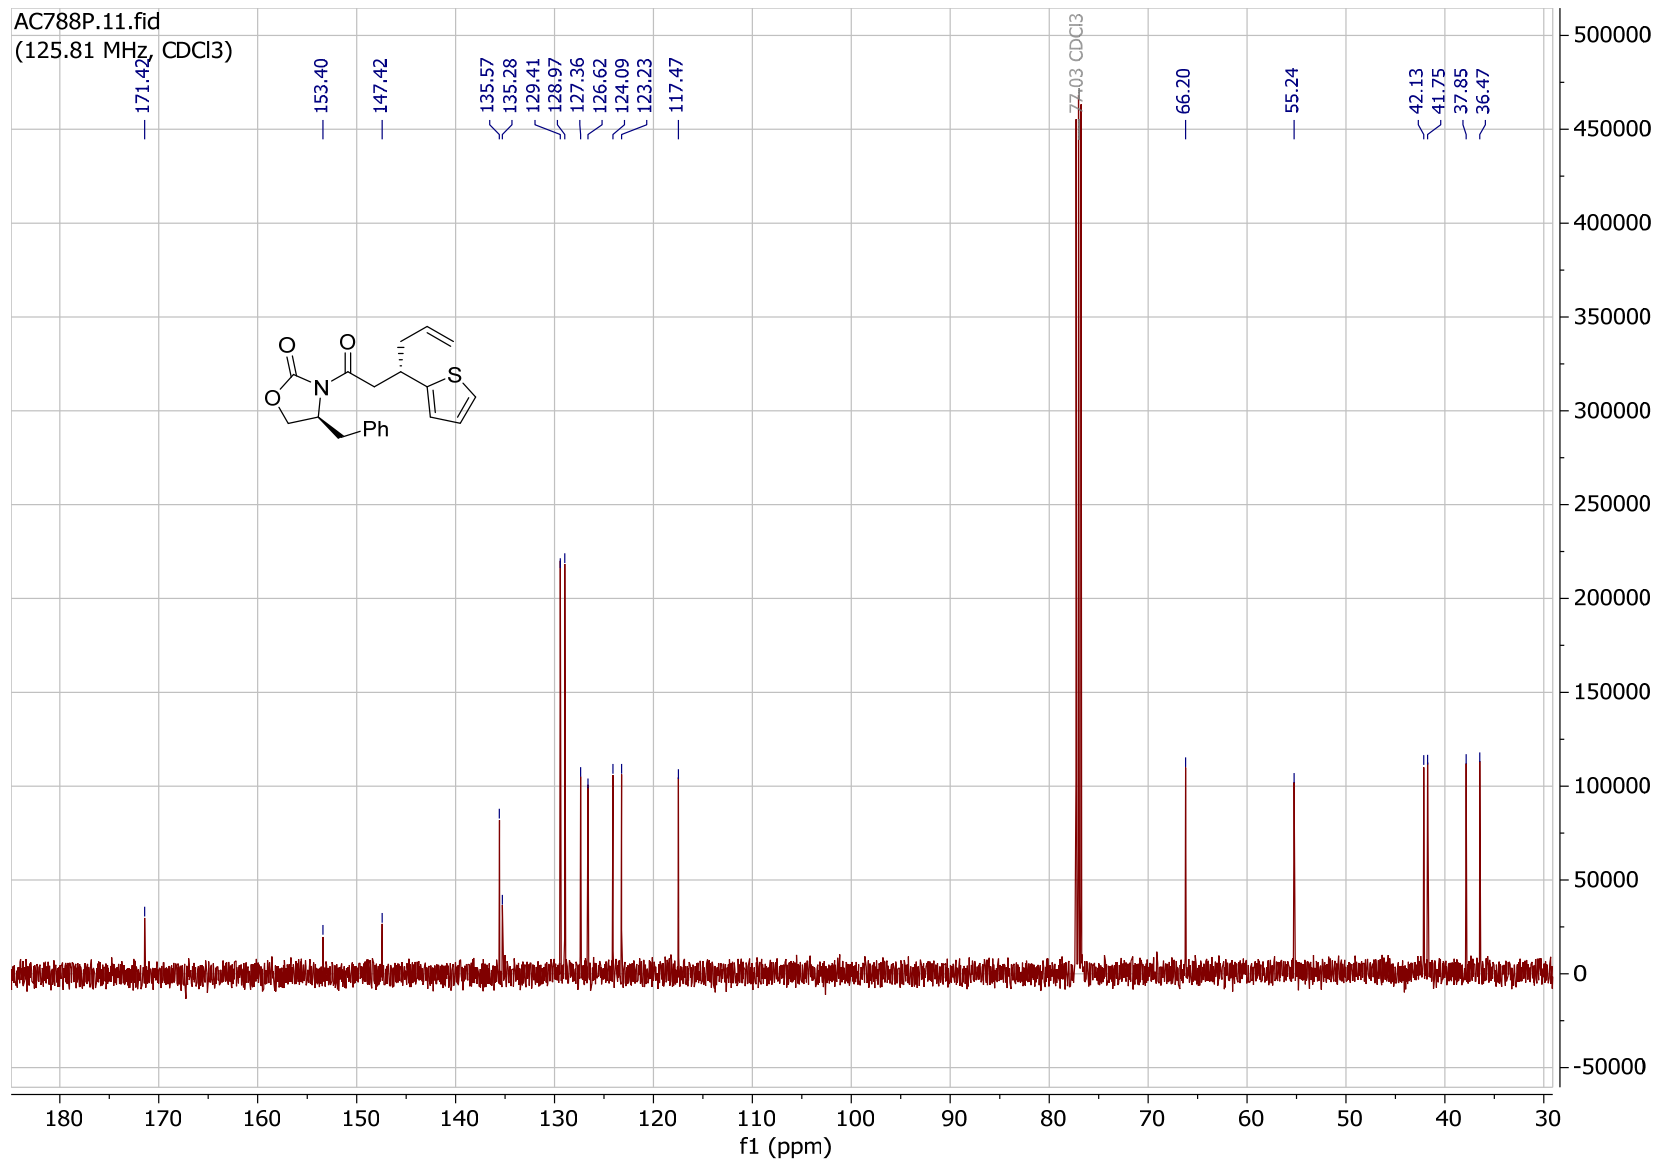

**(S)-4-Benzyl-3-((R)-3-[2-(benzyloxy)ethyl]hex-5-enoyl)oxazolidin-2-one S10**

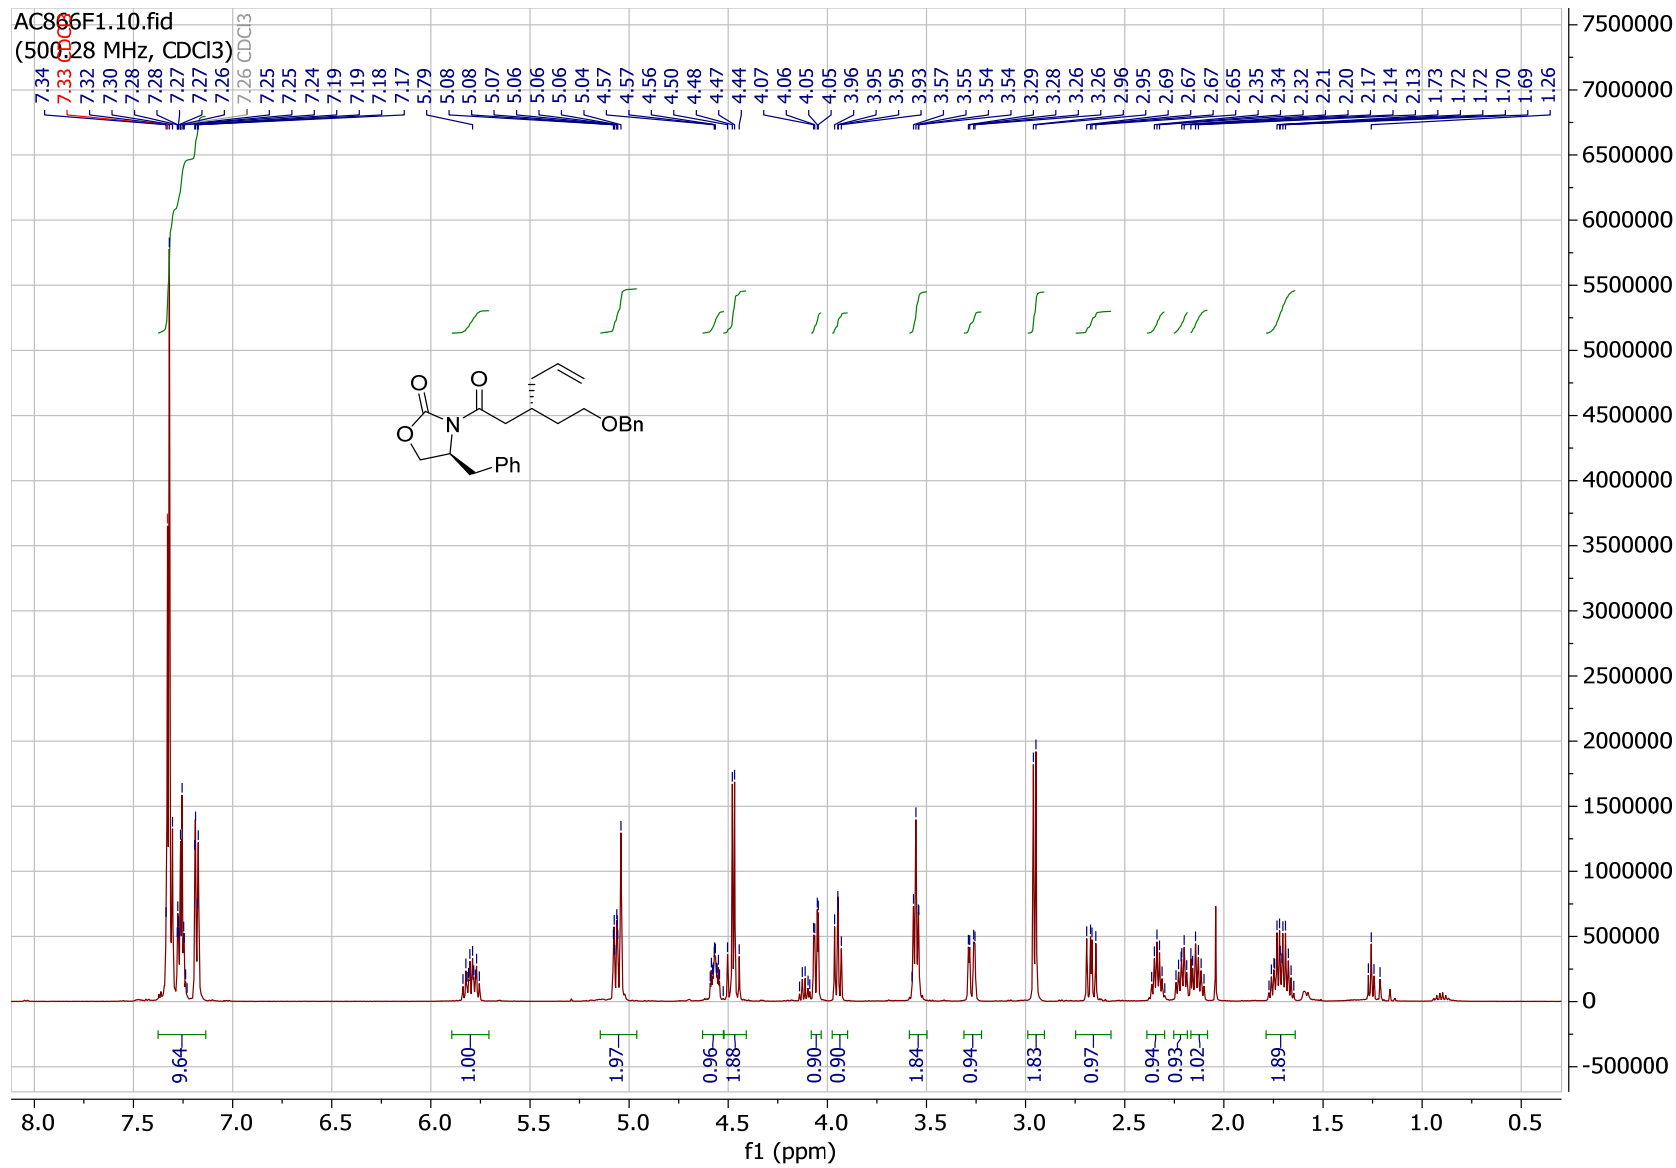

AC866F1.12.fid  
(125.81 MHz, CDCl<sub>3</sub>)

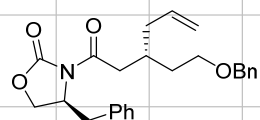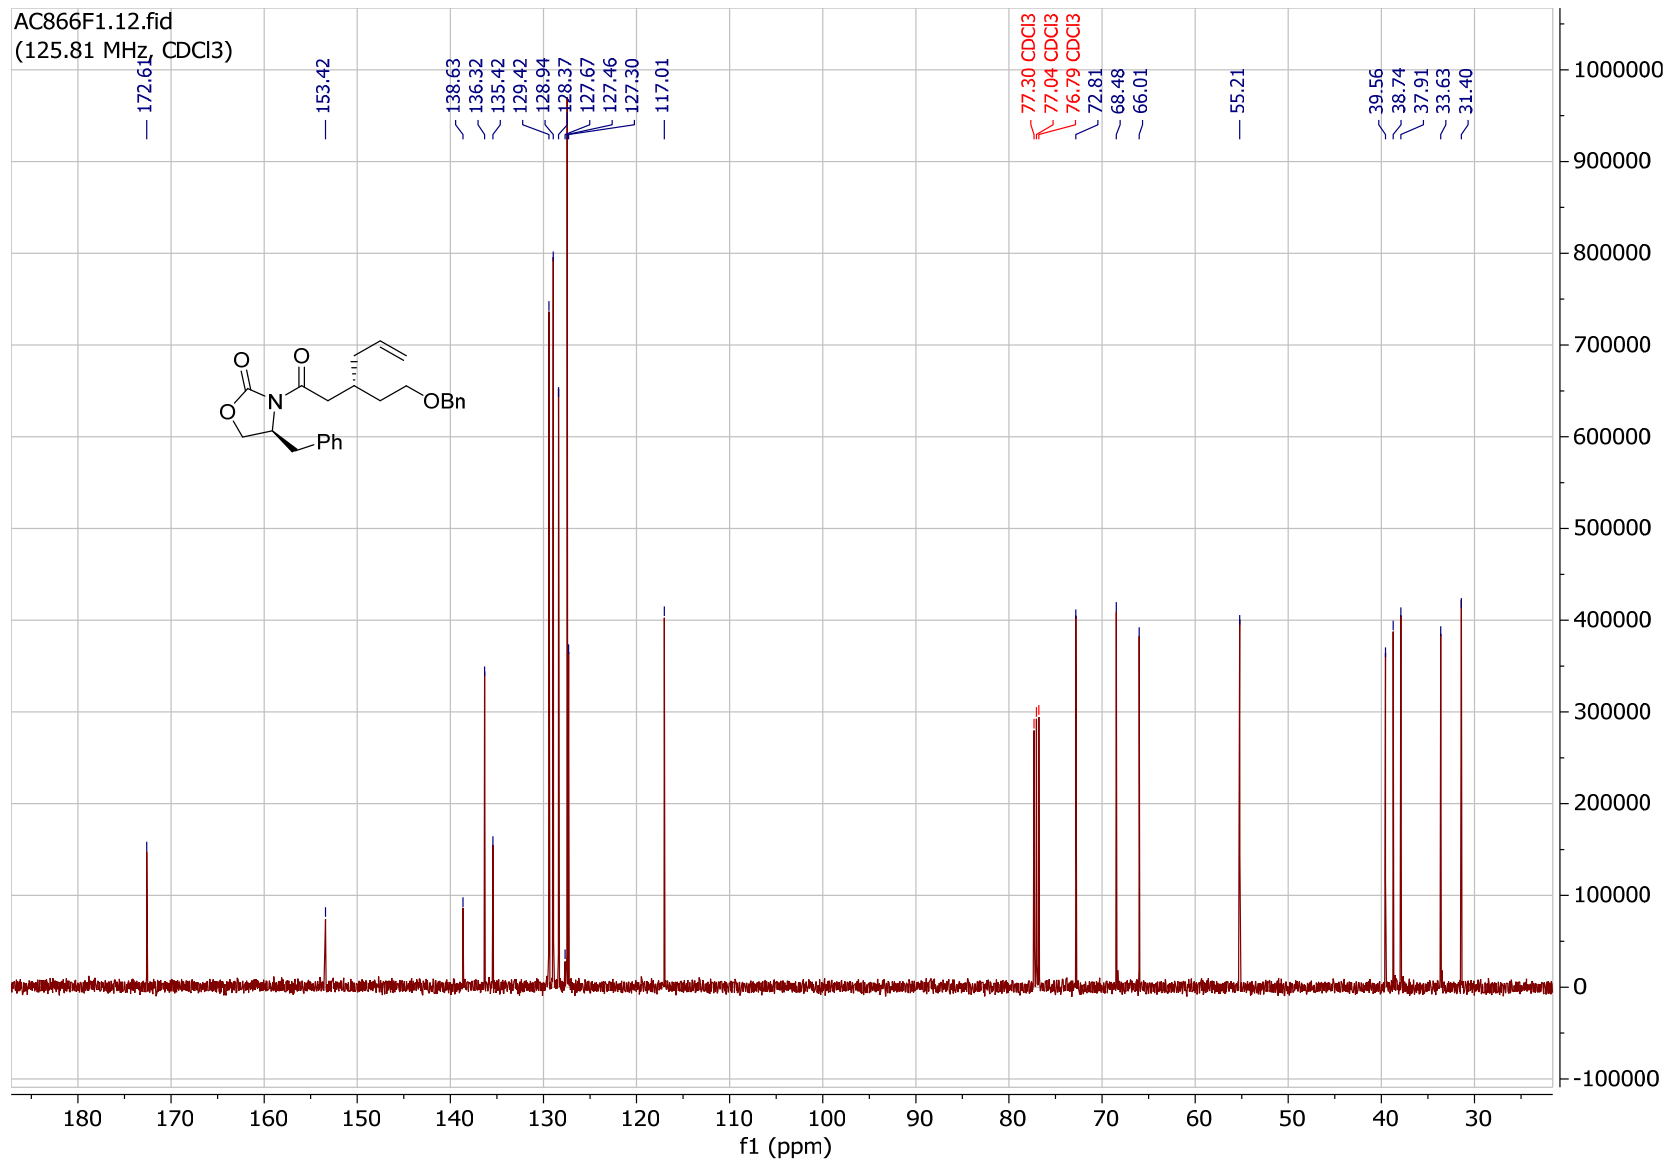

**(E)-3-Allyl-N-methoxy-N,4,4-trimethyl-7-phenylhept-6-enamide 1ag**

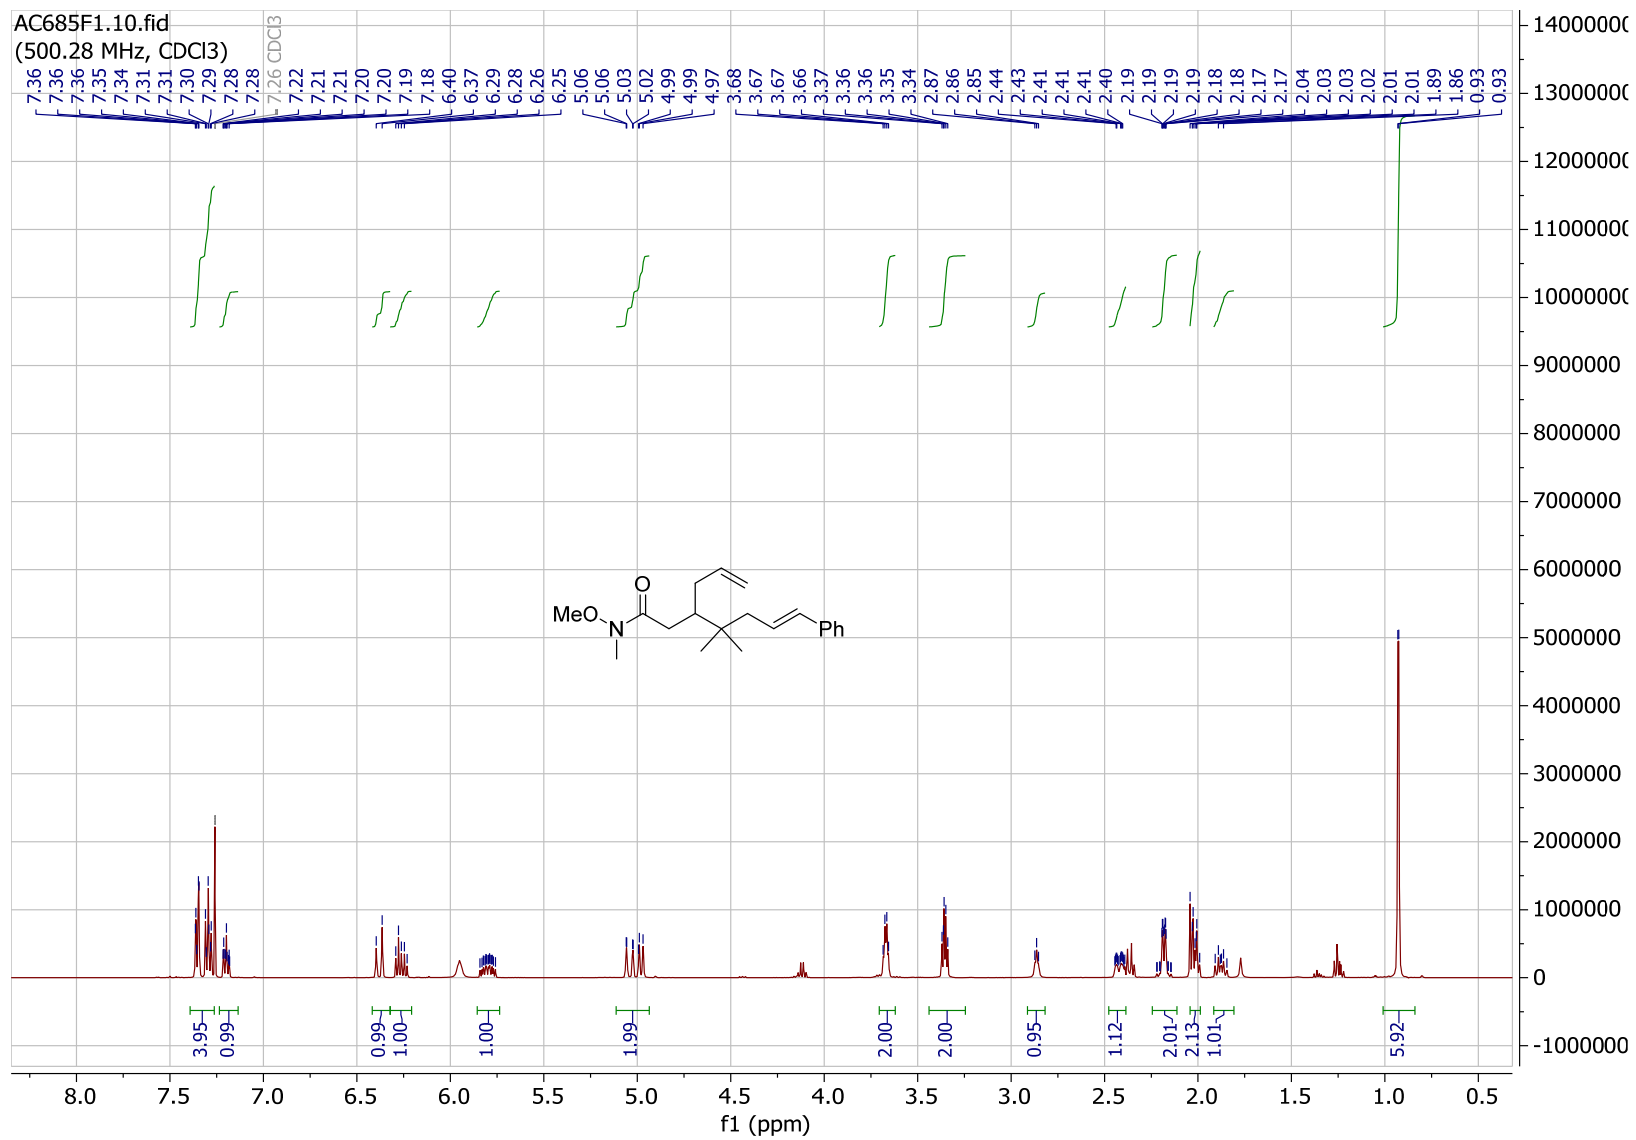

AC685F1.11.fid  
(125.81 MHz, CDCl<sub>3</sub>)

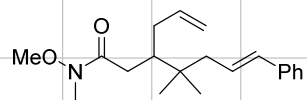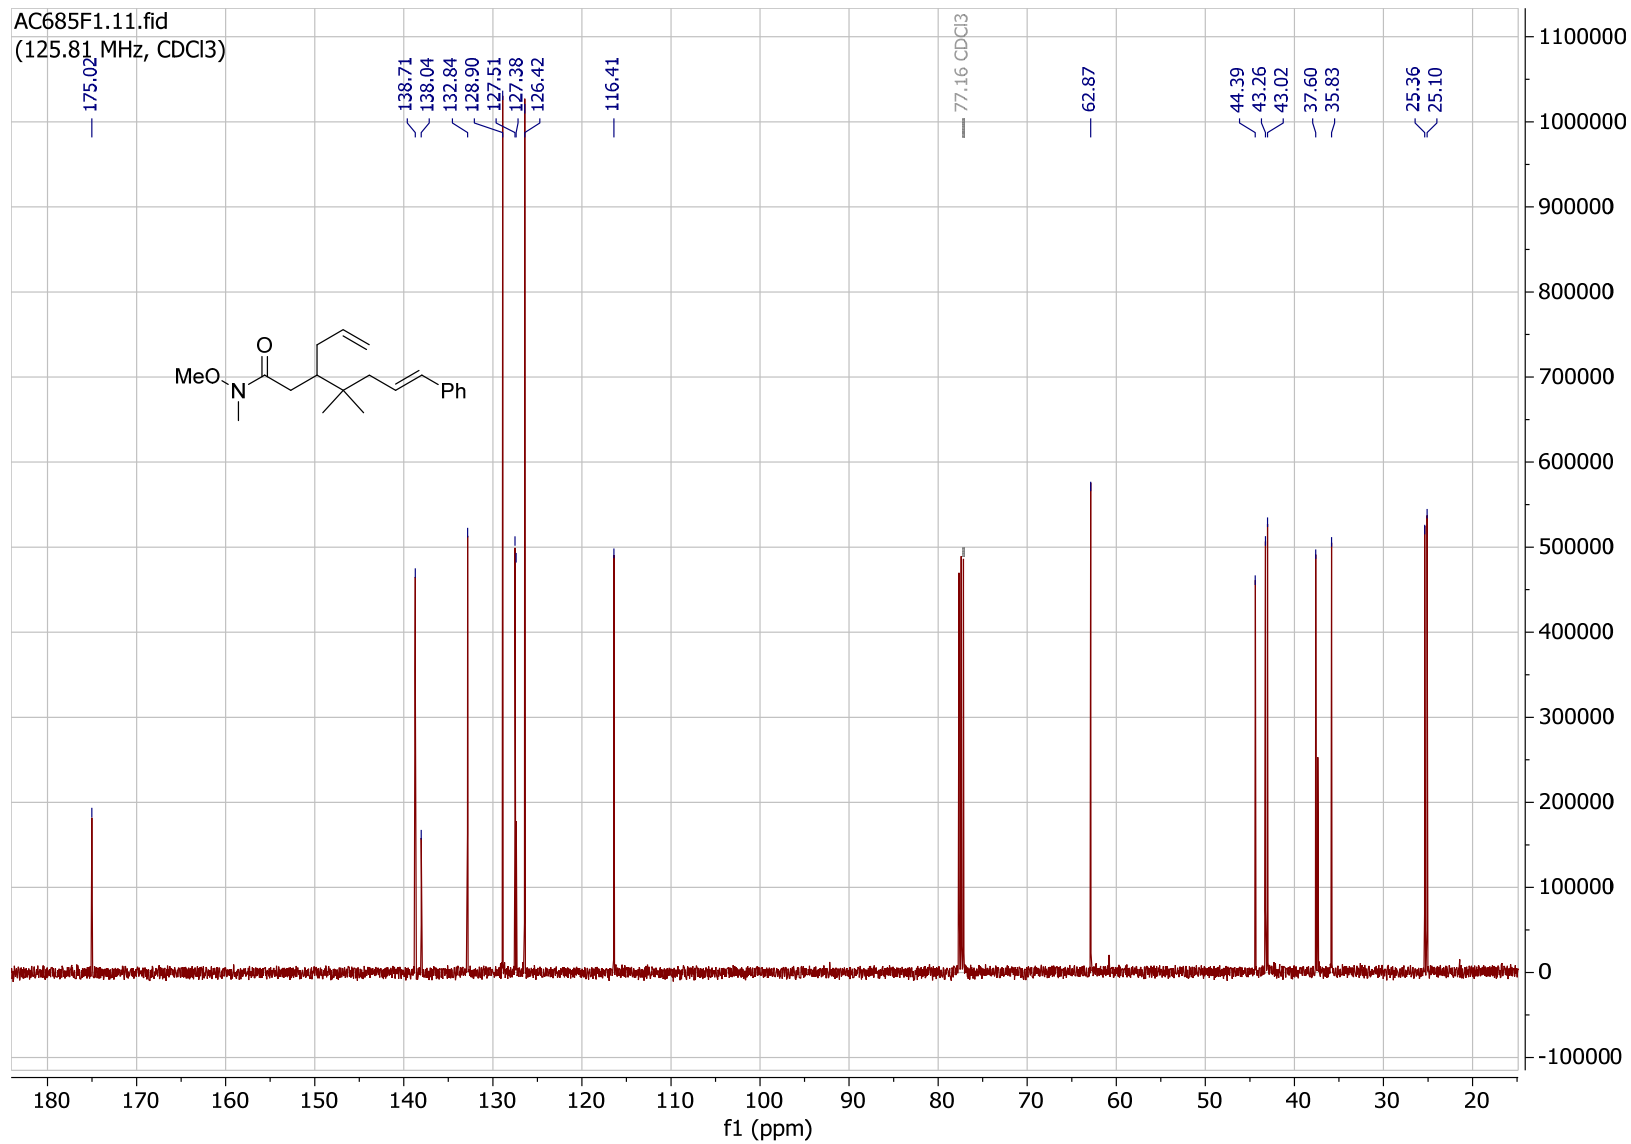

# 2-Allyl-N-methoxy-N,5-dimethylhexanamide 1bc

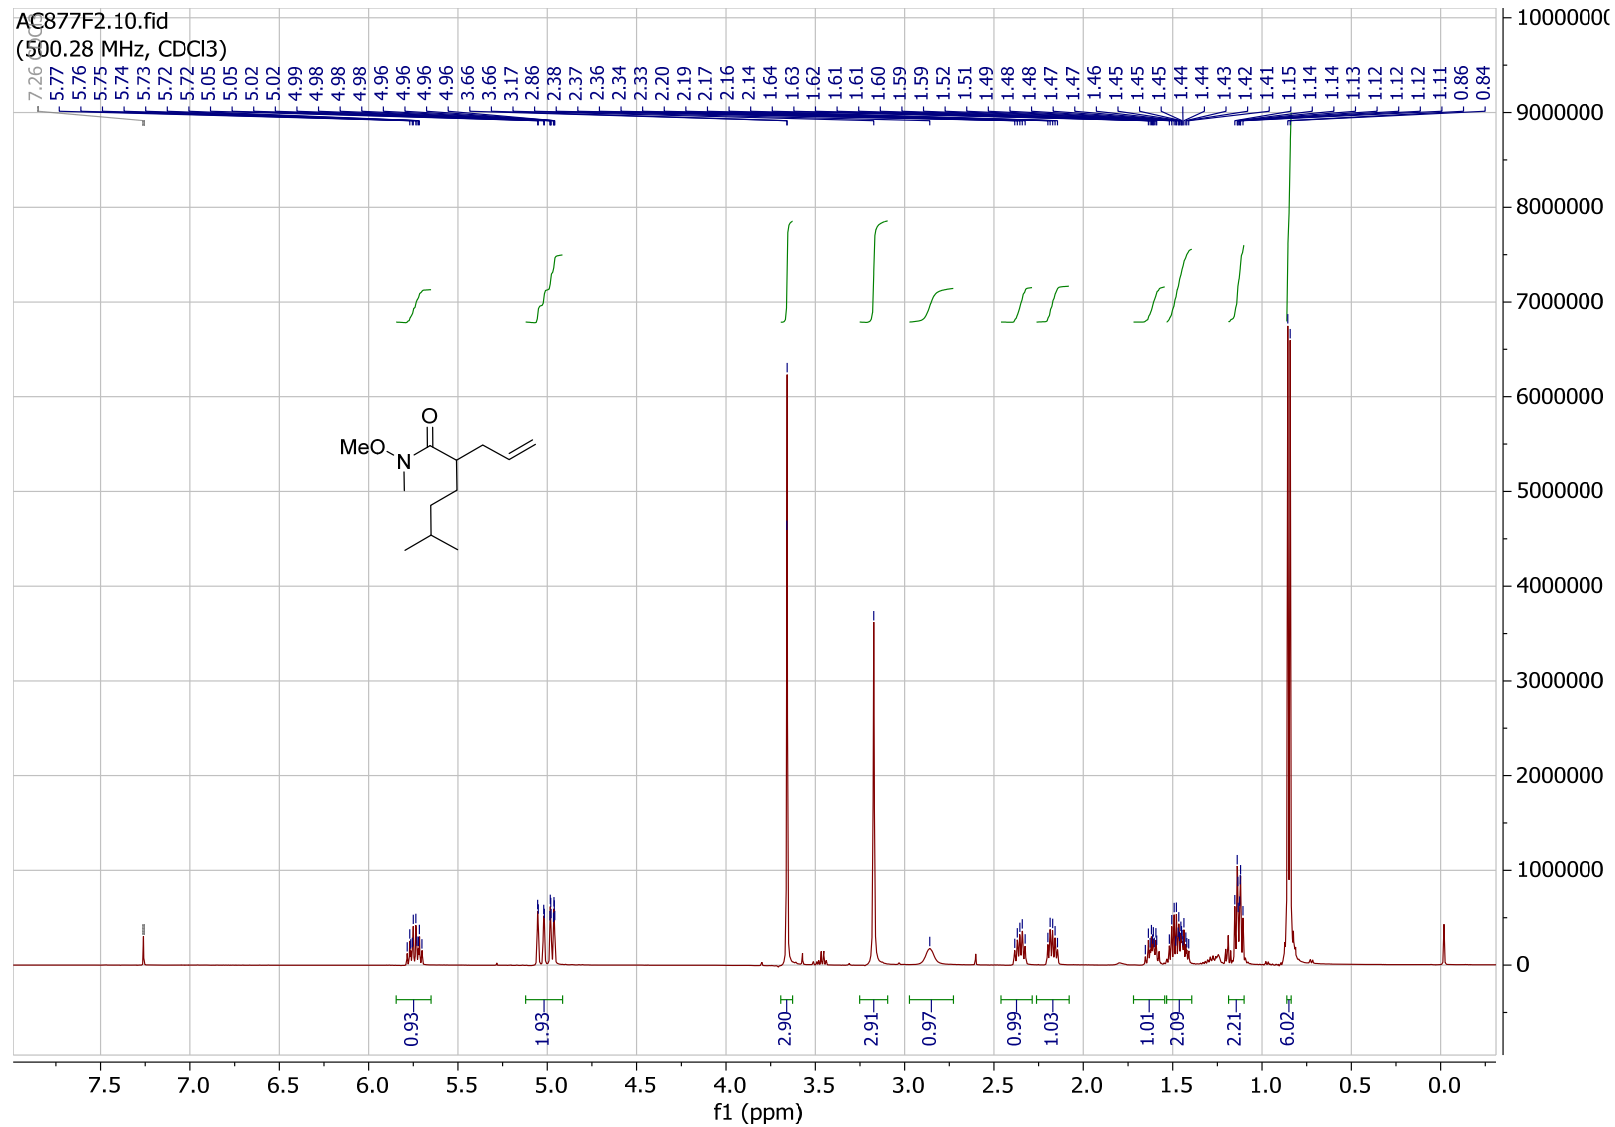



AC877F2.11.fid  
(125.81 MHz, CDCl<sub>3</sub>)

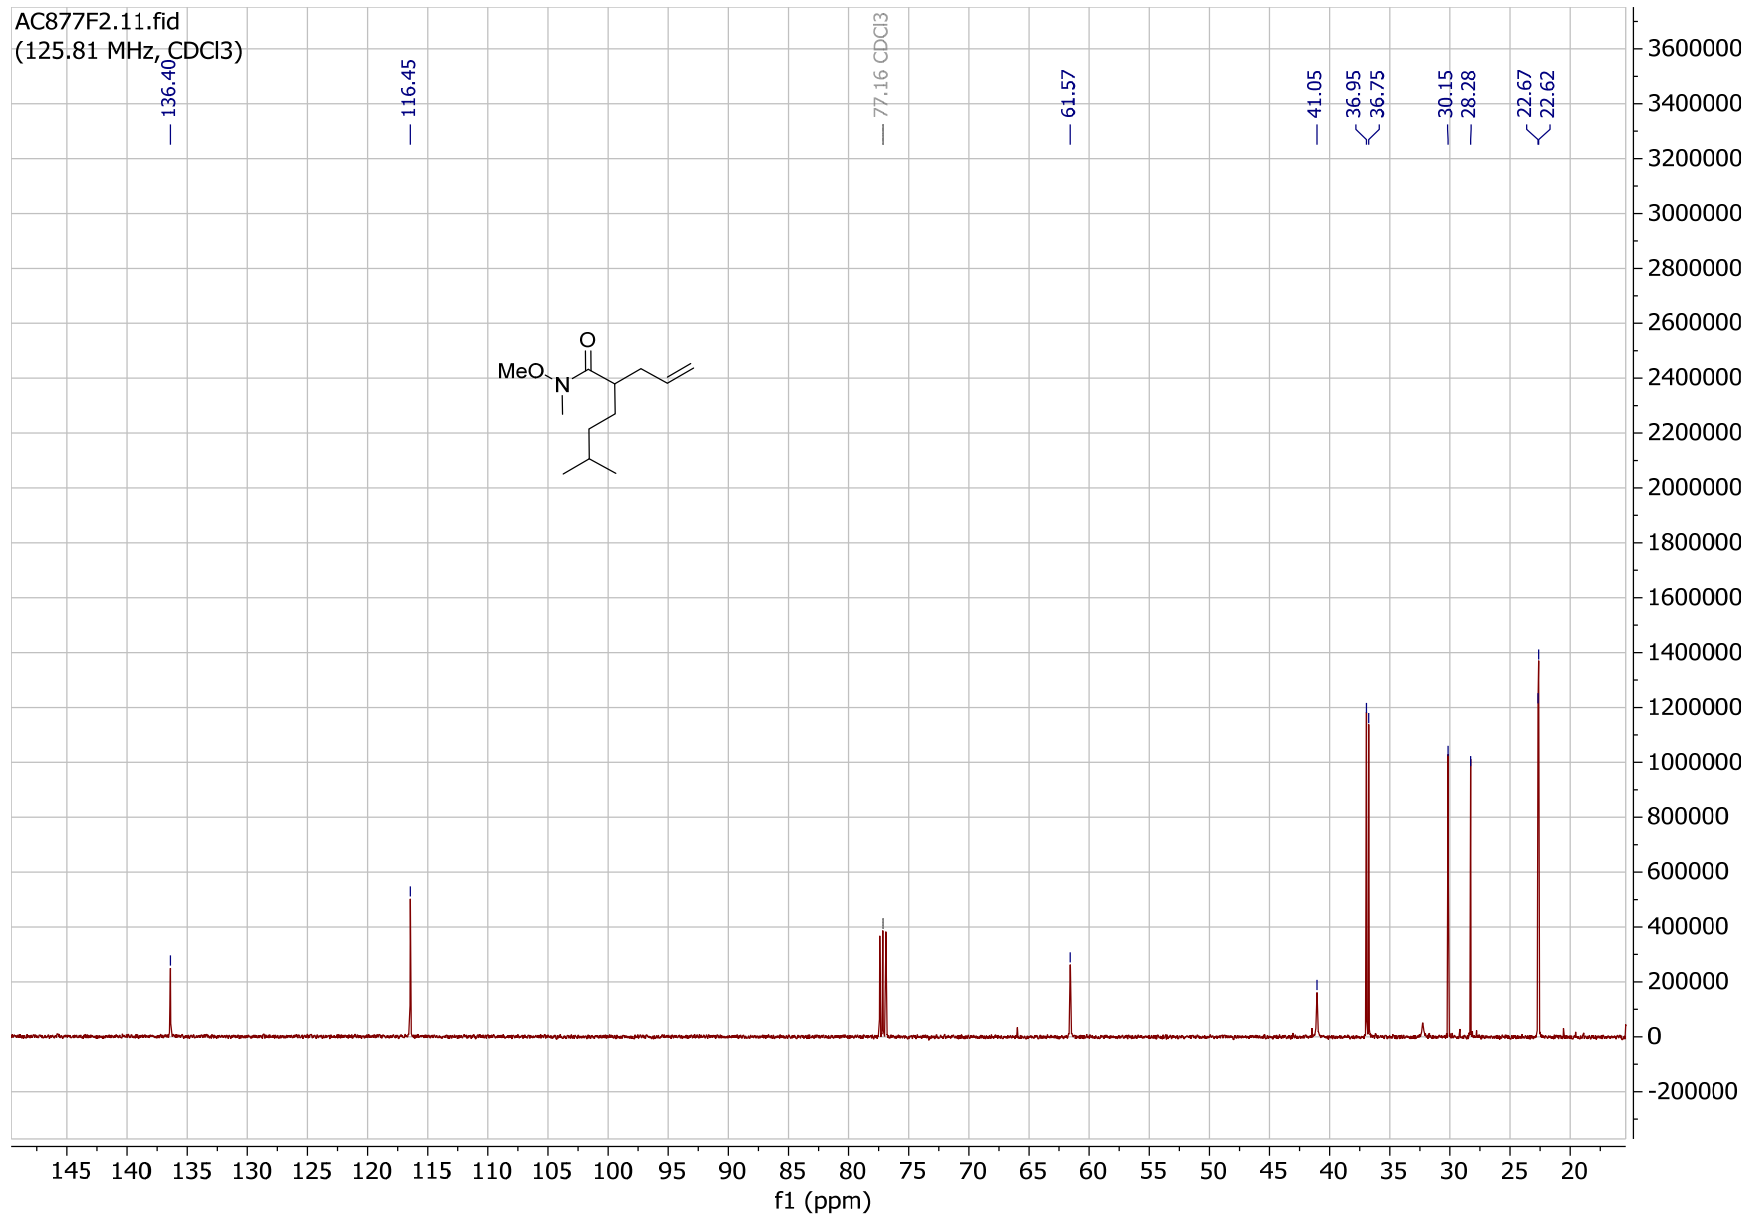

### 3-(2-Bromophenyl)-*N*-methoxy-*N*-methylhex-5-enamide 1ah

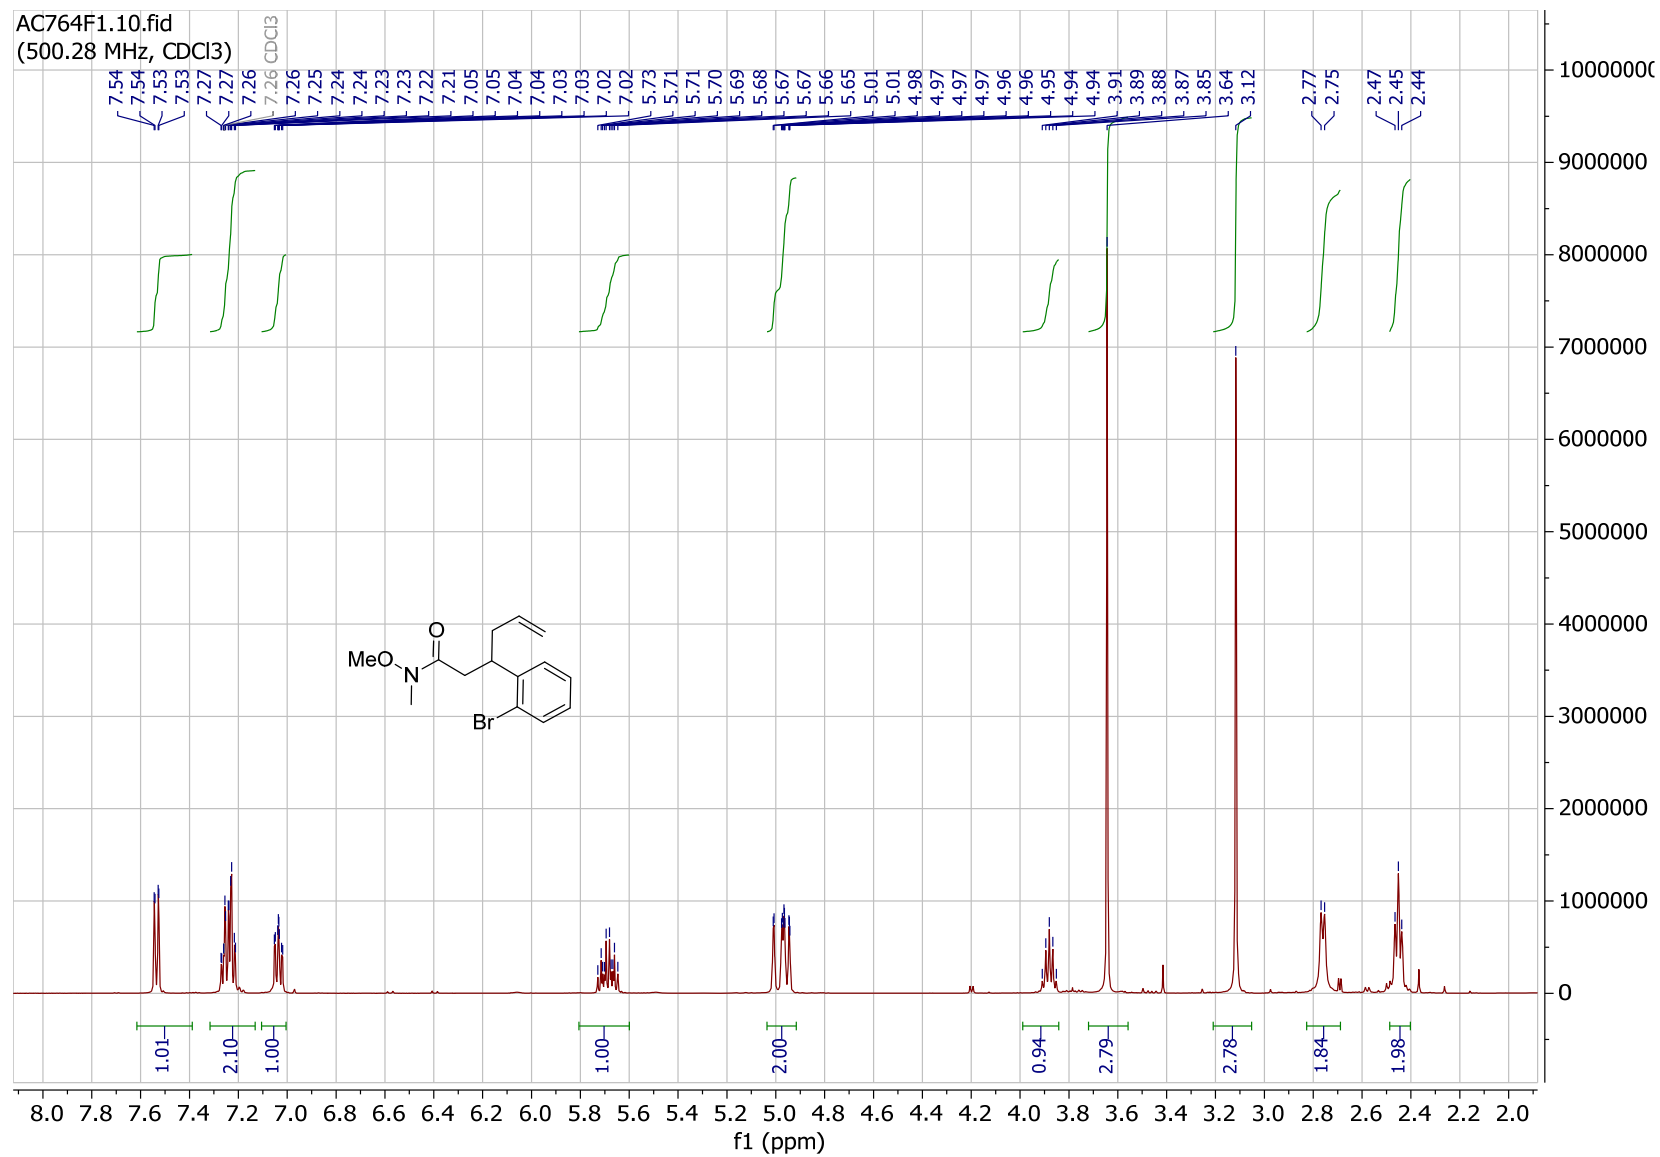

AC764F1.11.fid  
(125.81 MHz, CDCl<sub>3</sub>)

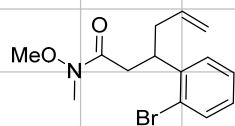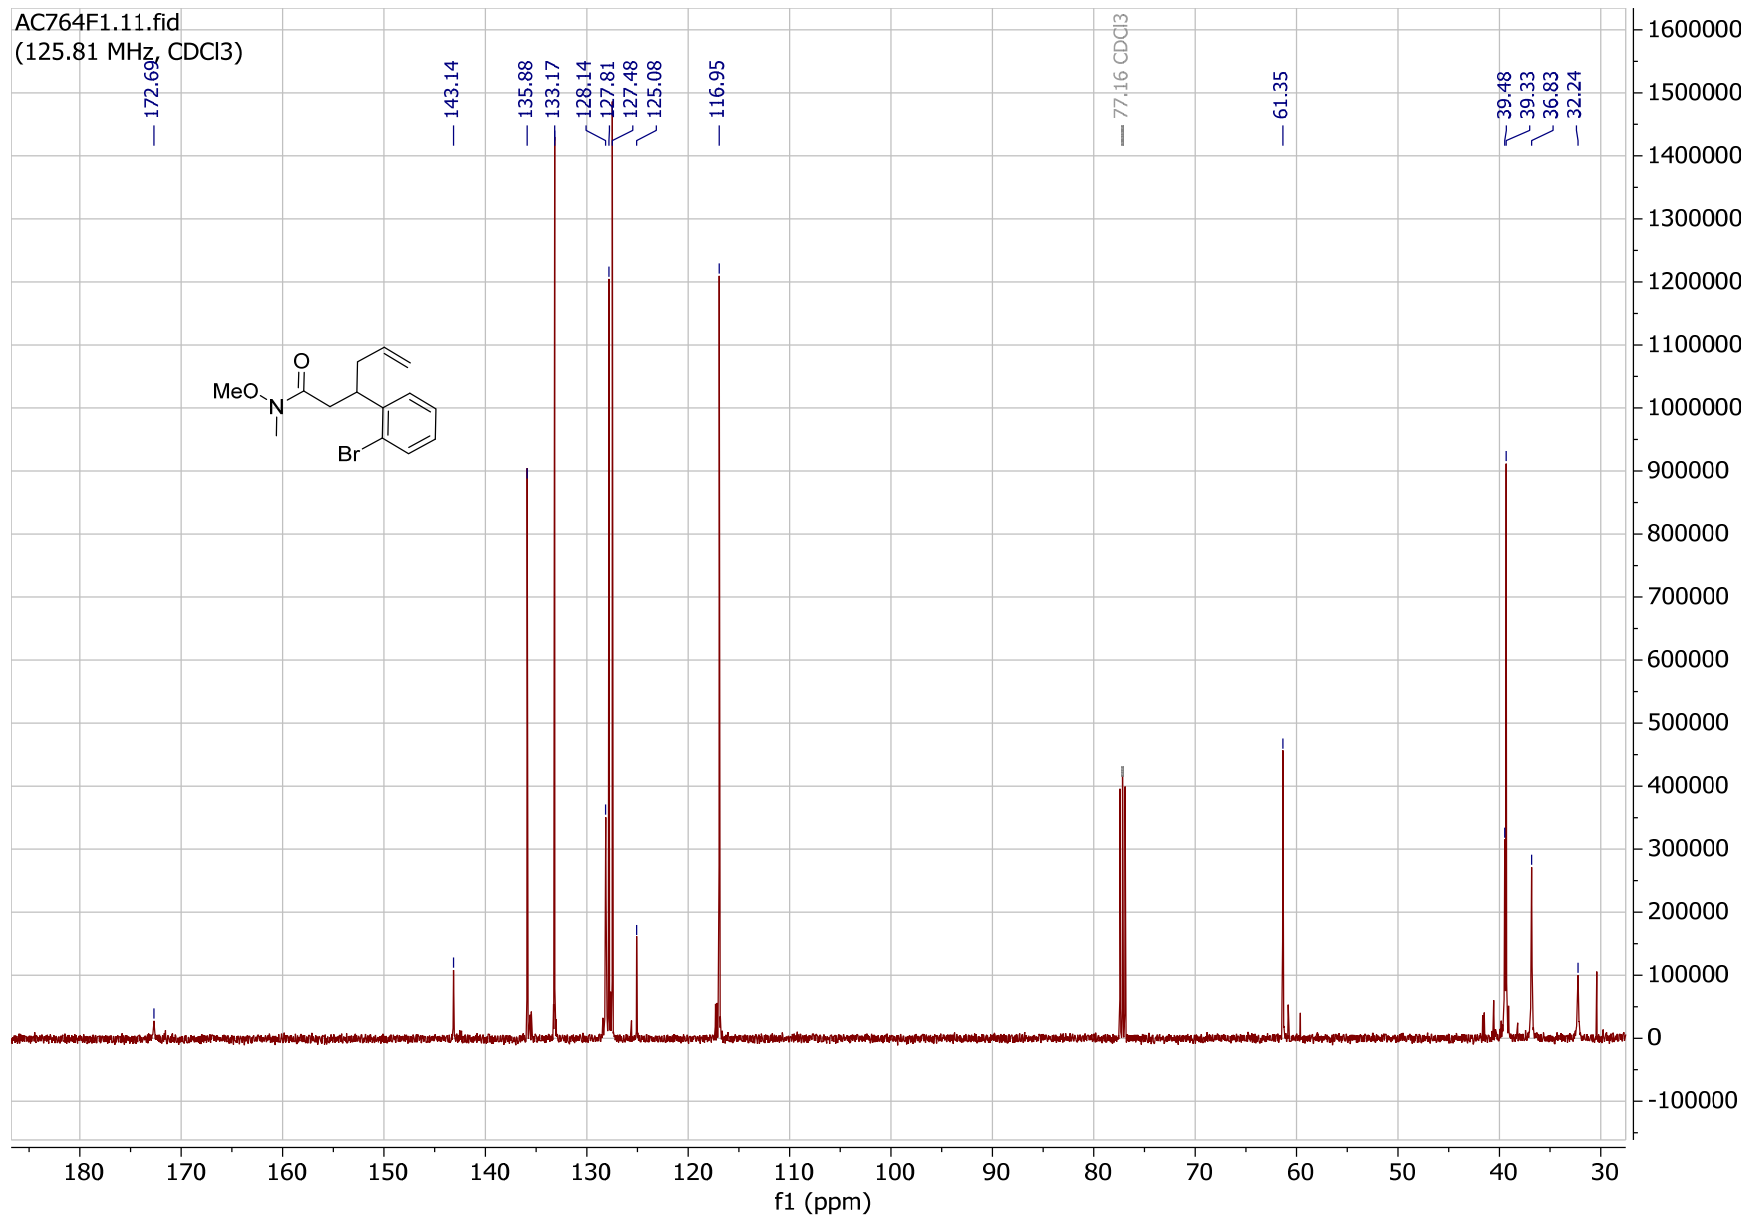

***N*-Methoxy-*N*-methyl-3-(naphthalen-1-yl)hex-5-enamide 1ai**

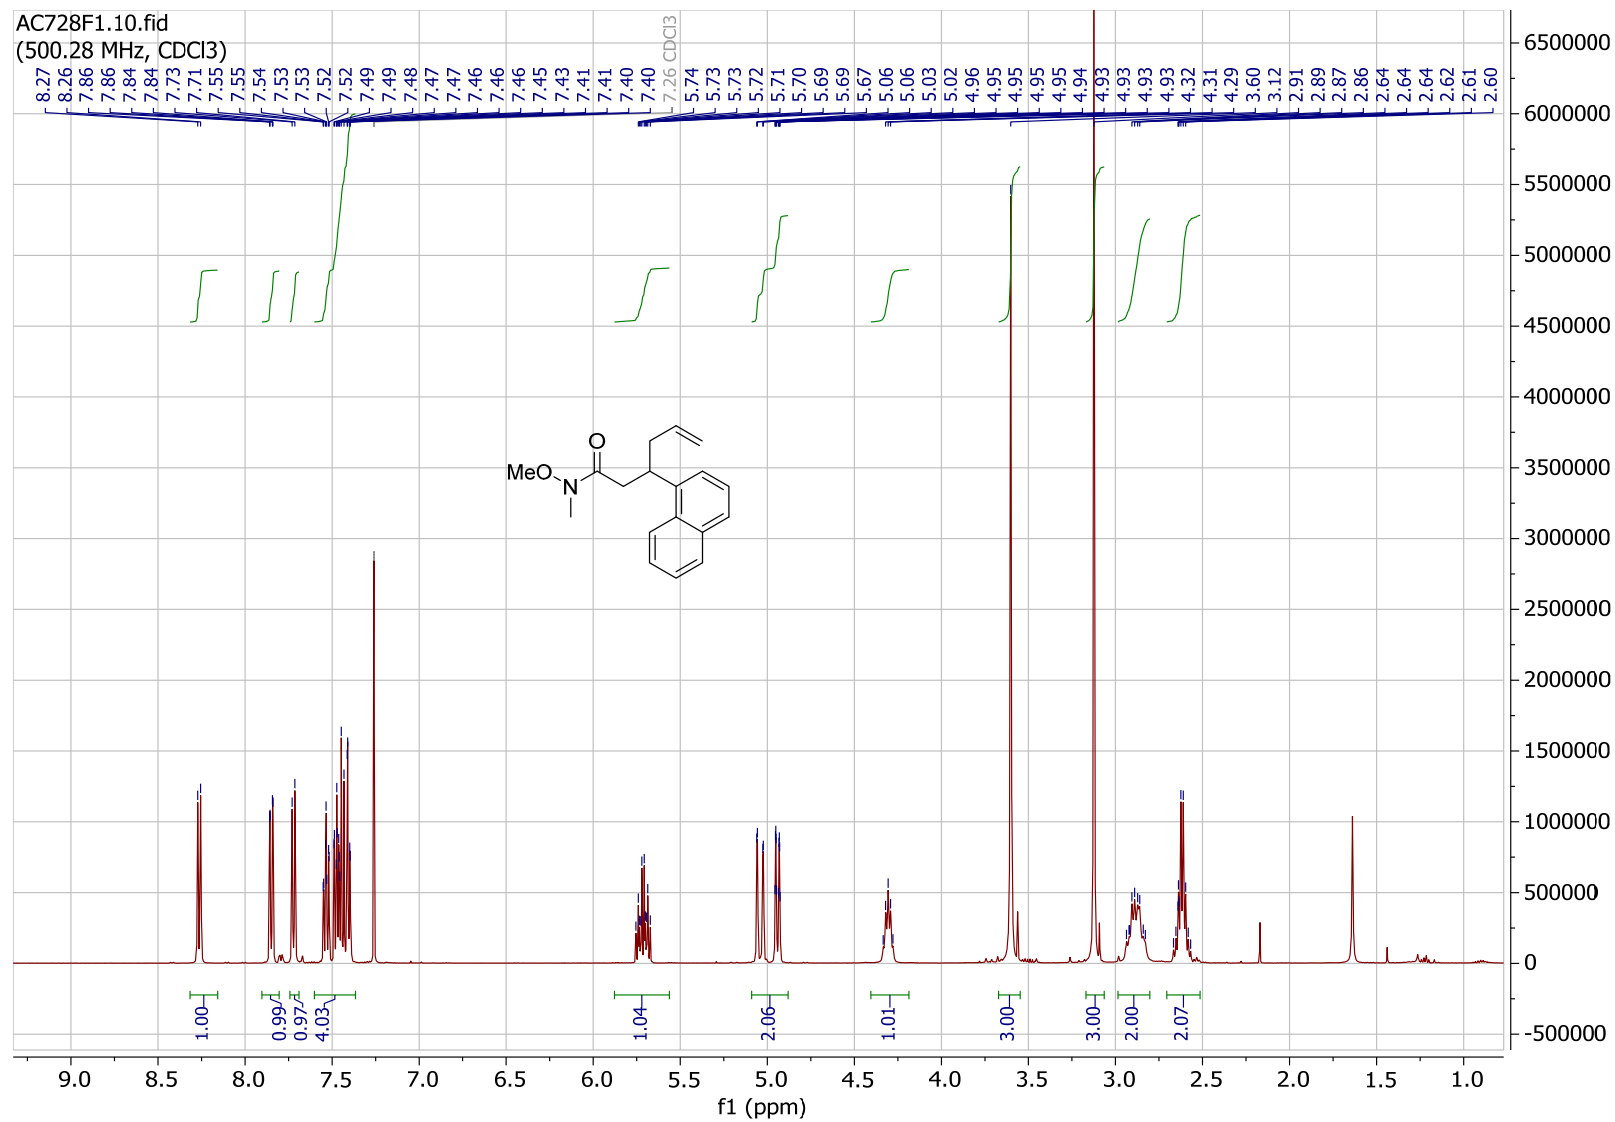

AC728F1.11.fid  
(125.81 MHz, CDCl<sub>3</sub>)

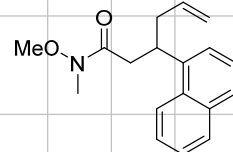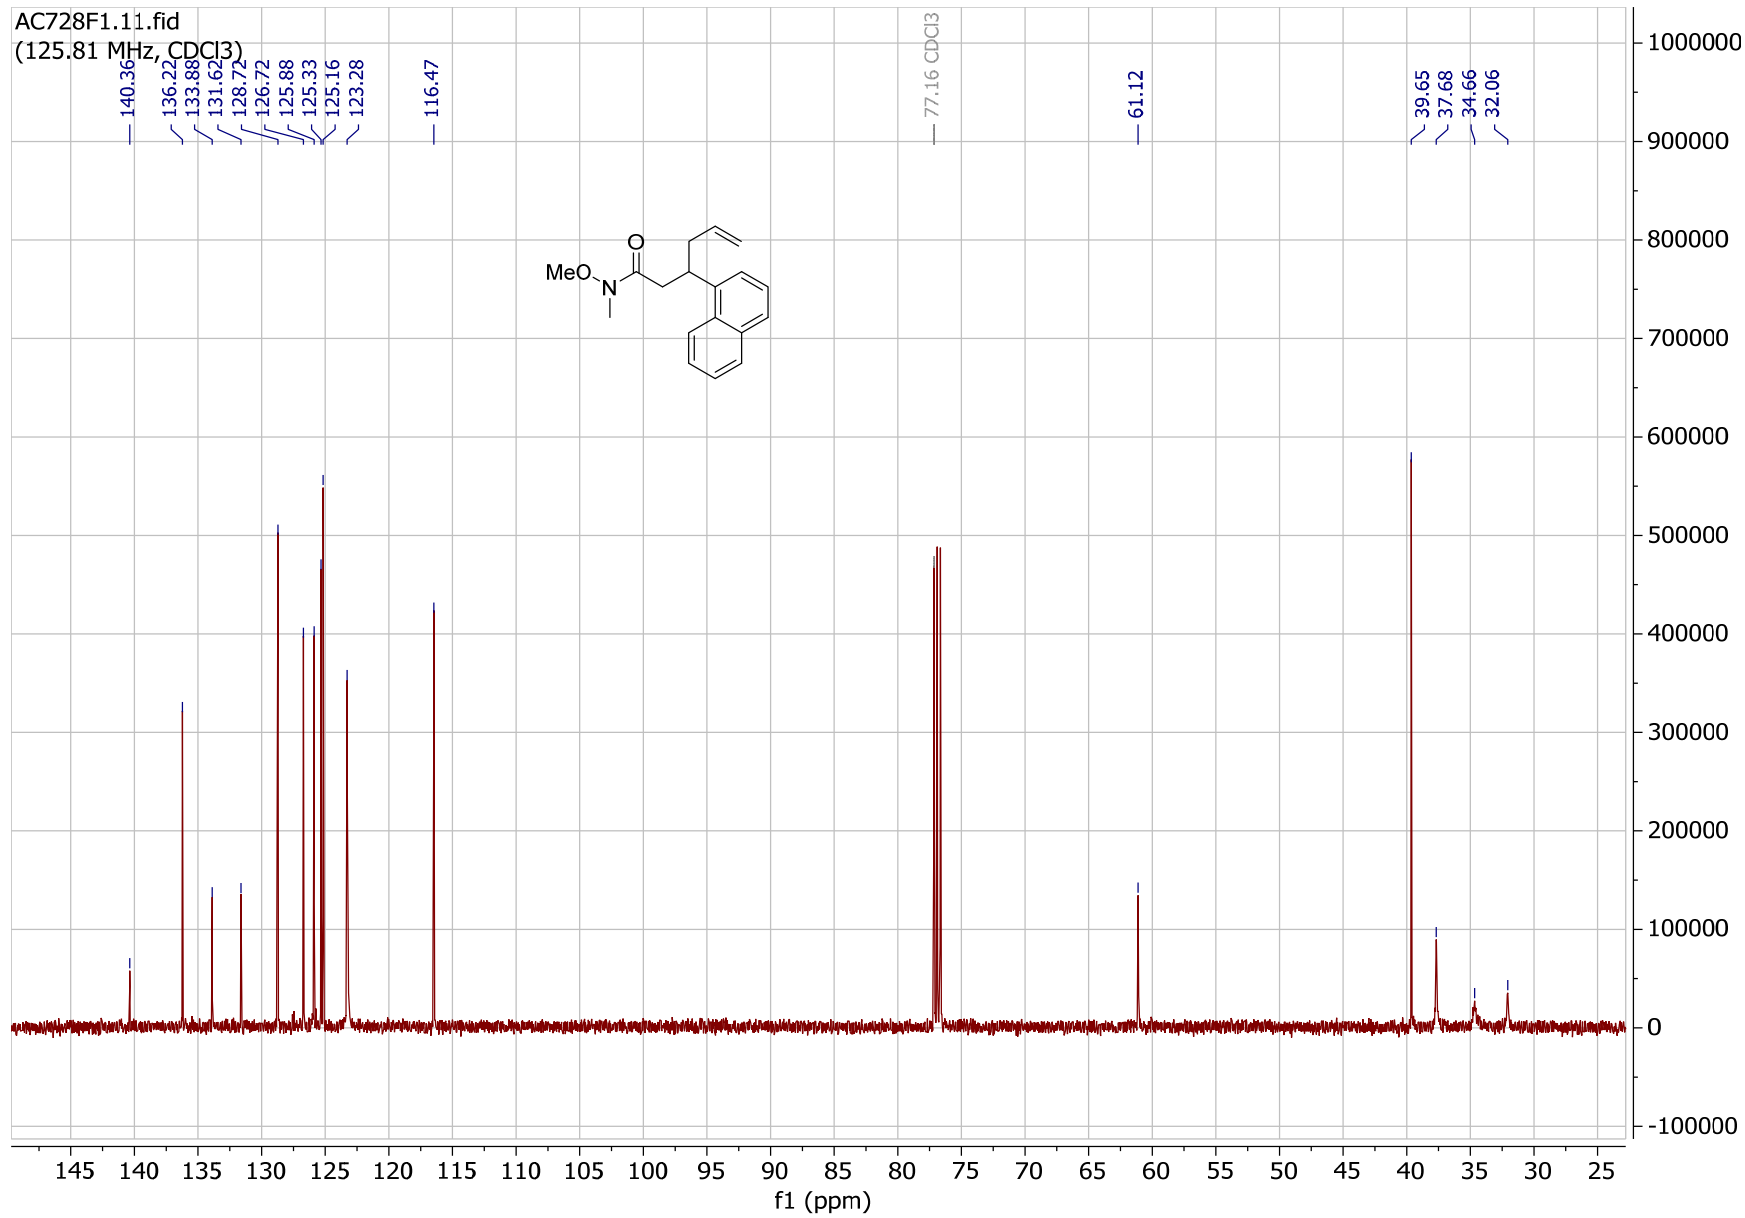

### 3-Ferrocenyl-*N*-methoxy-*N*-methylhex-5-enamide 1aj

AC780F1DMSO.10.fid  
(500.28 MHz, DMSO)

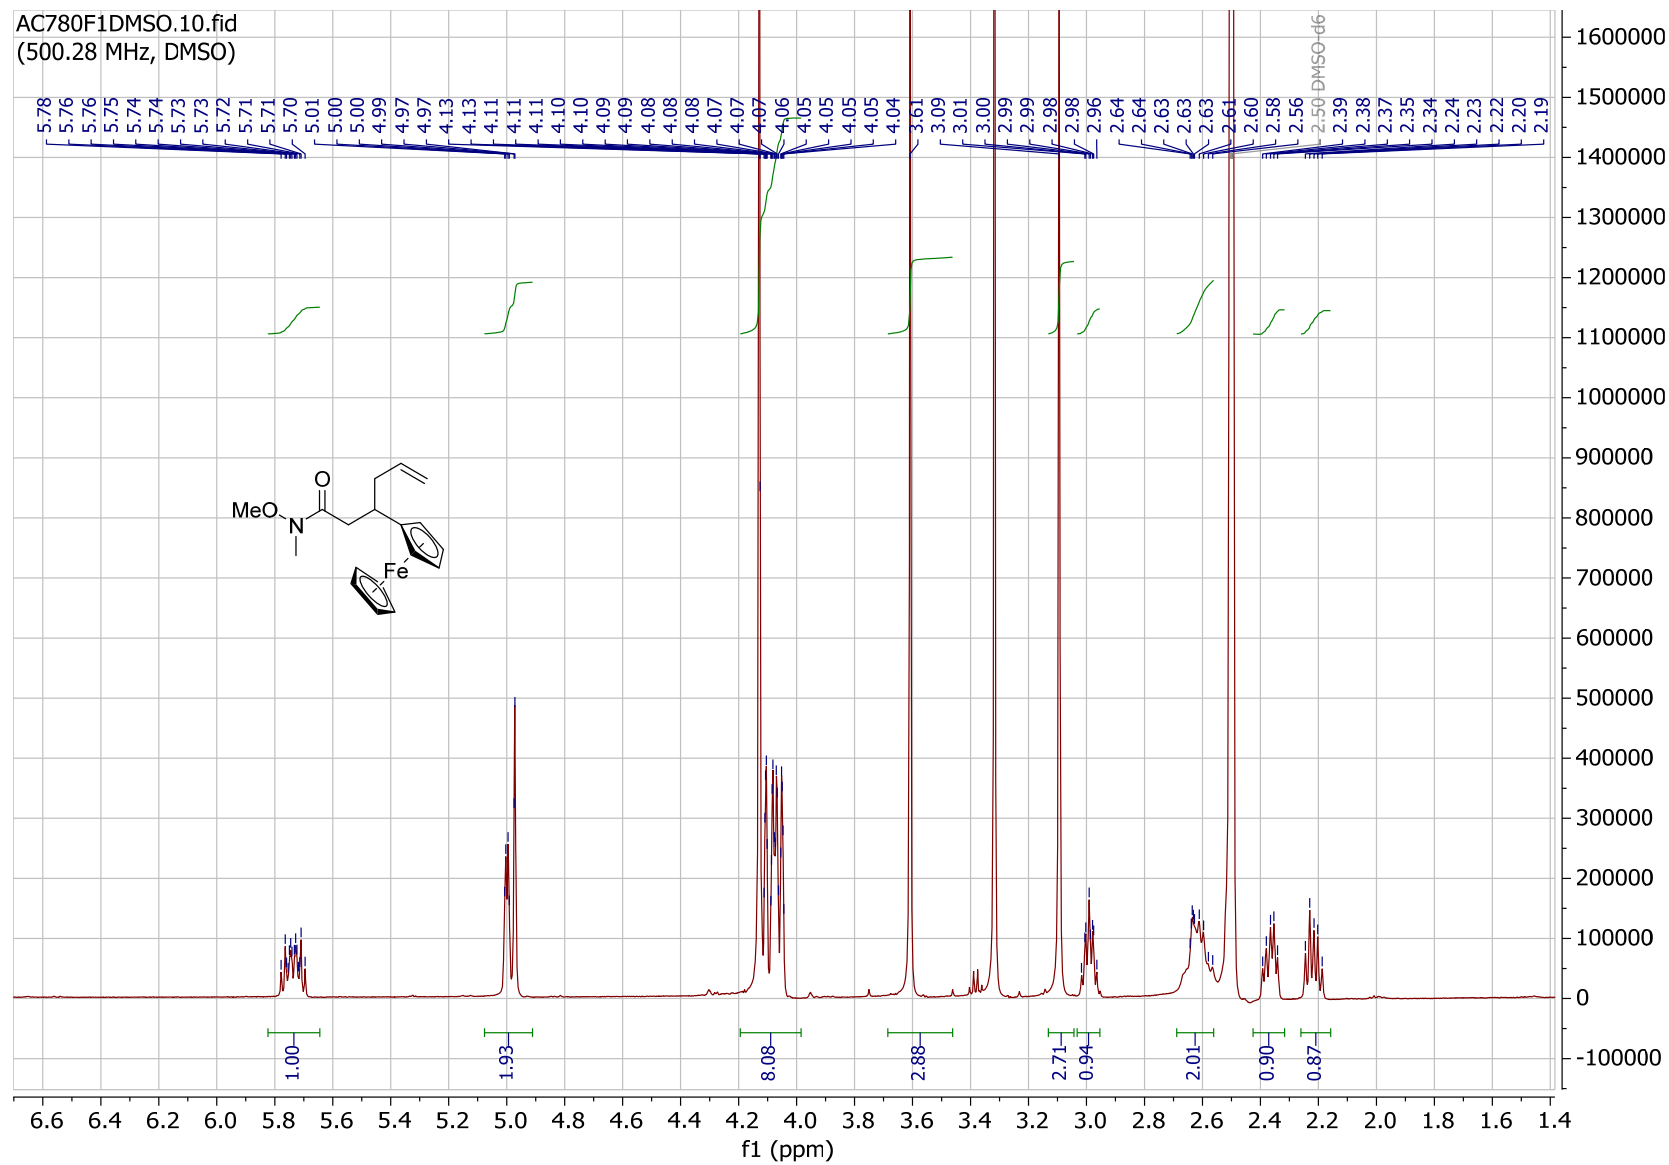

AC780F1DMSO.11.fid  
(125.81 MHz, DMSO)

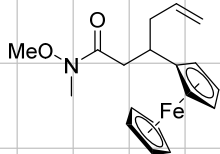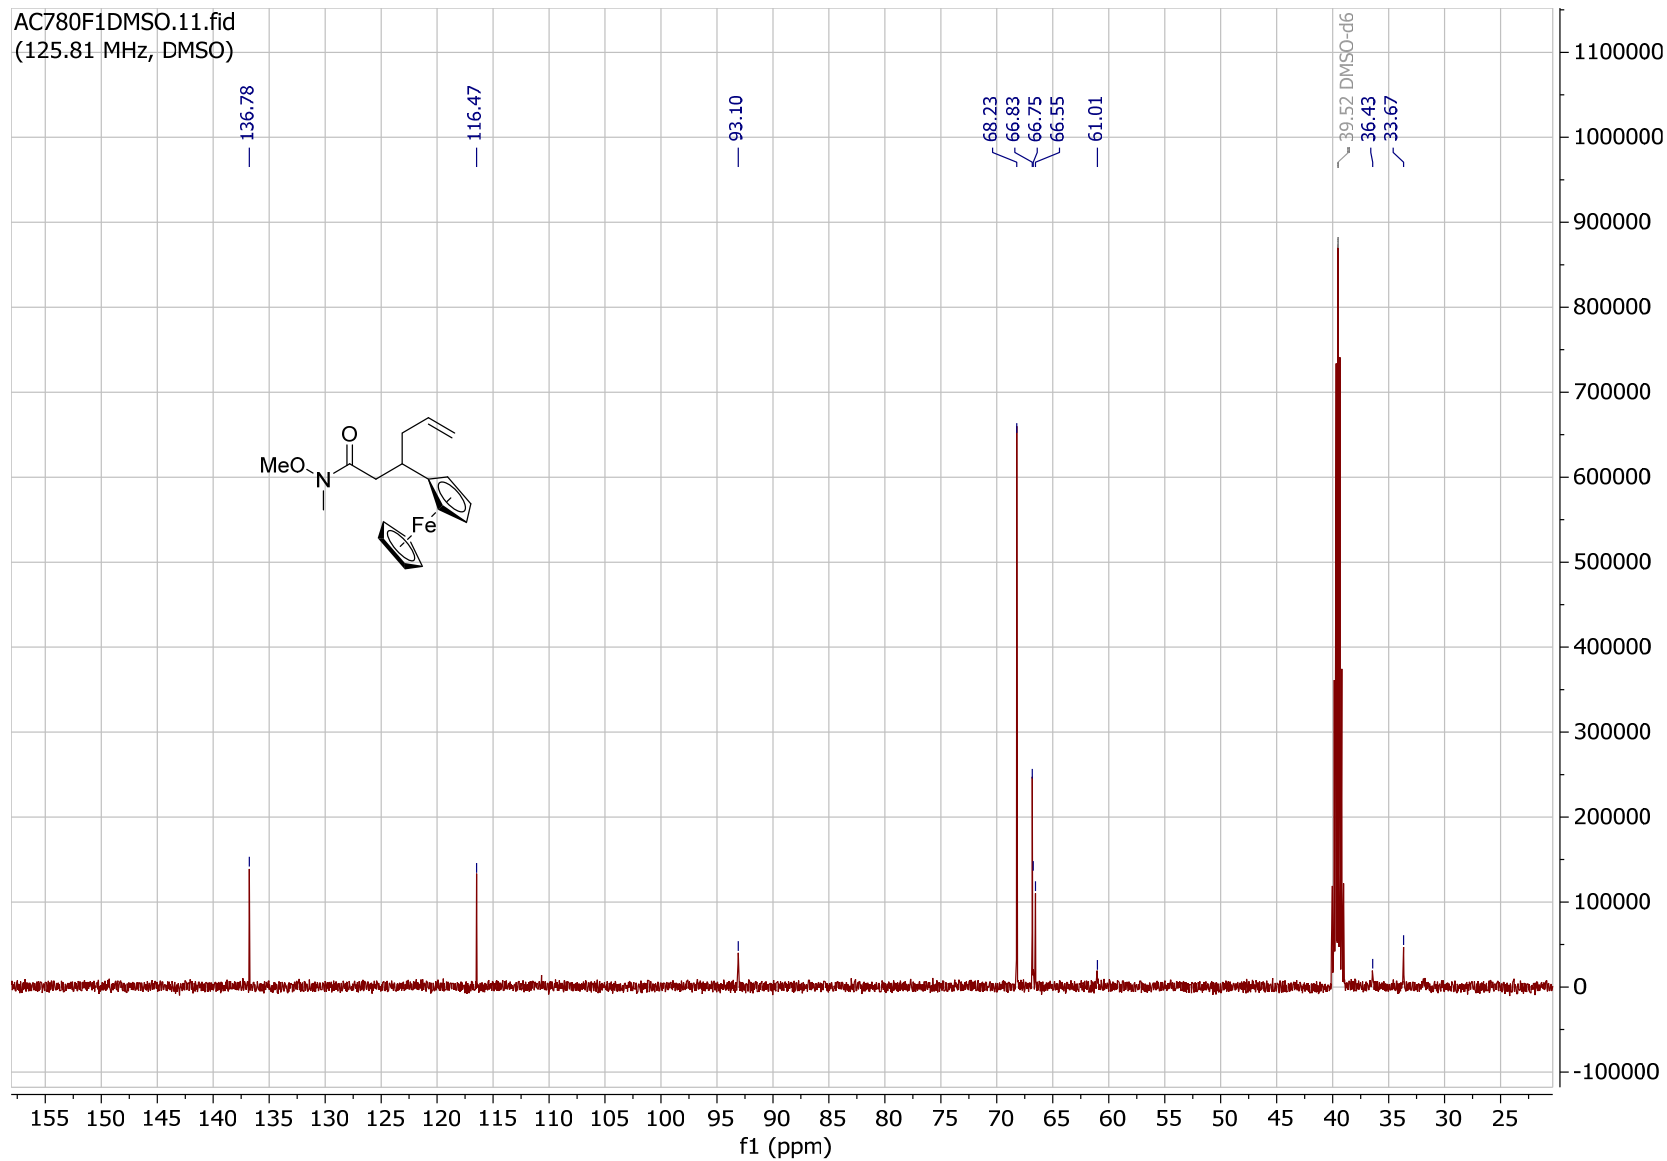

**(S)-N-Methoxy-N-methyl-3-(thiophen-2-yl)hex-5-enamide 1ak**

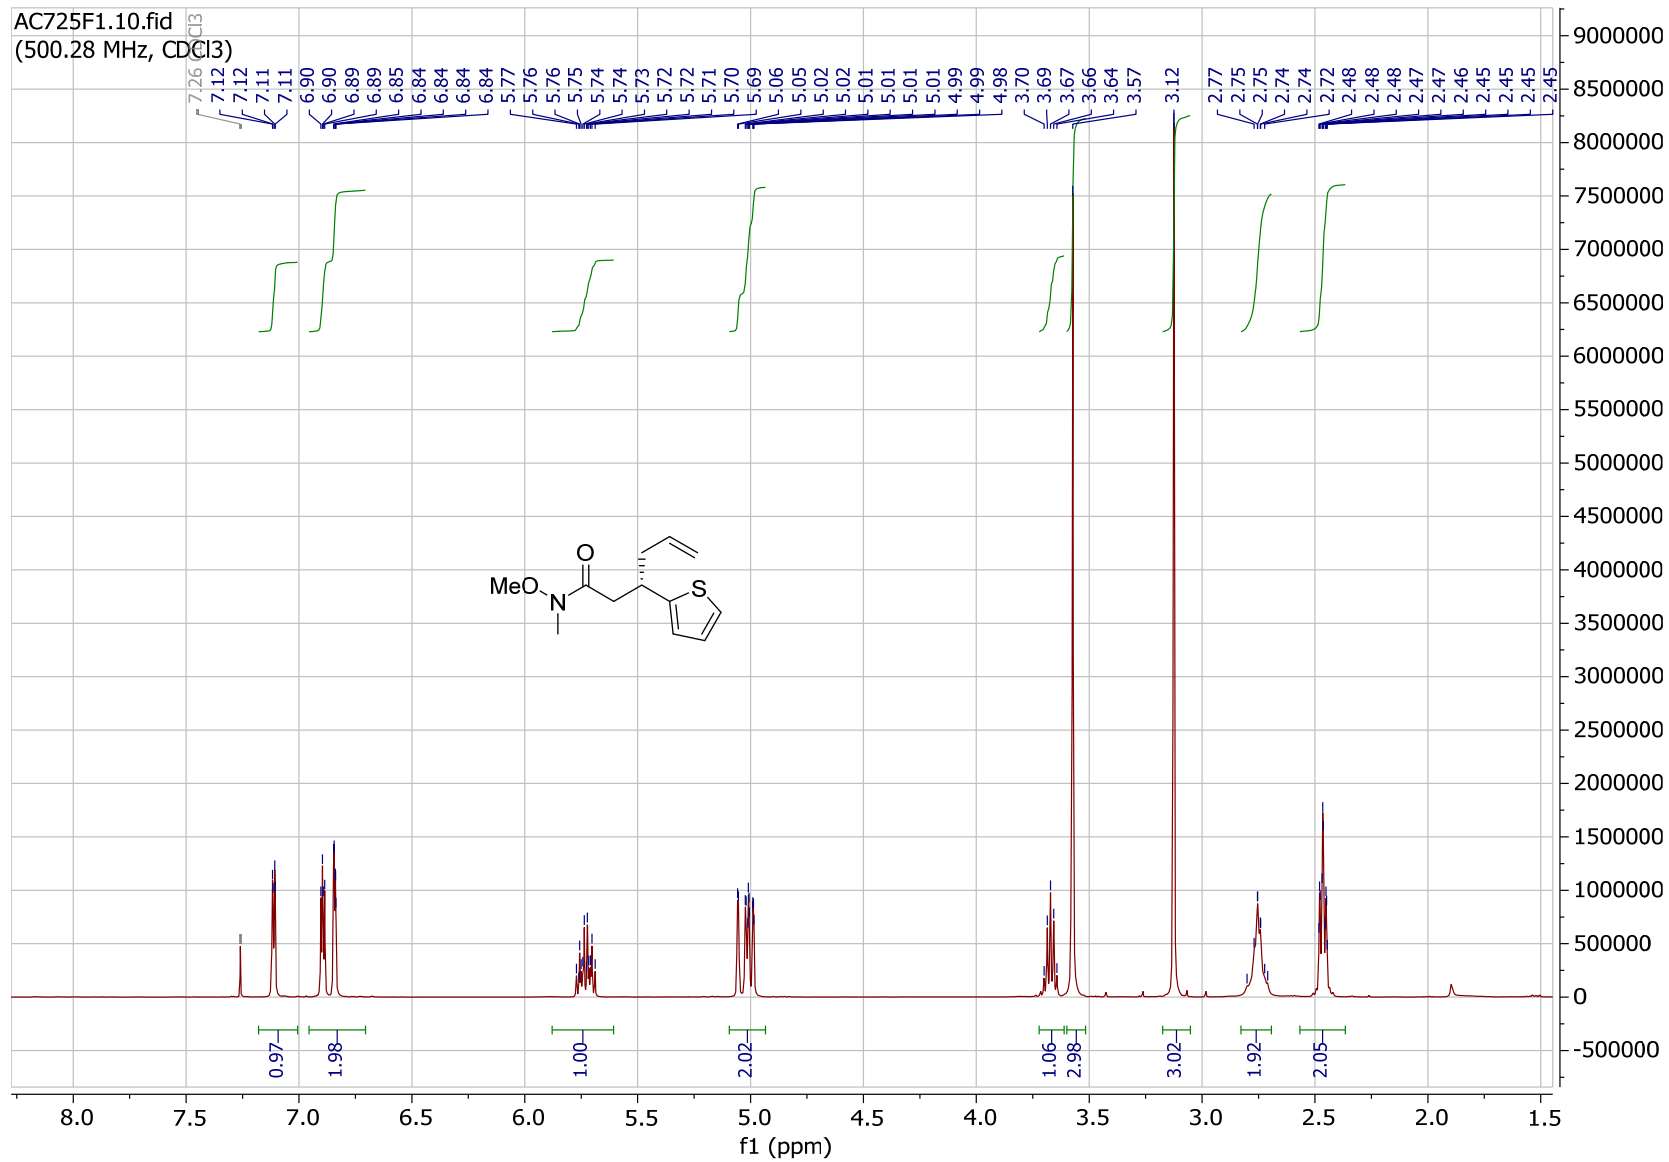



AC725F1.111.fid  
(125.81 MHz, CDCl<sub>3</sub>)

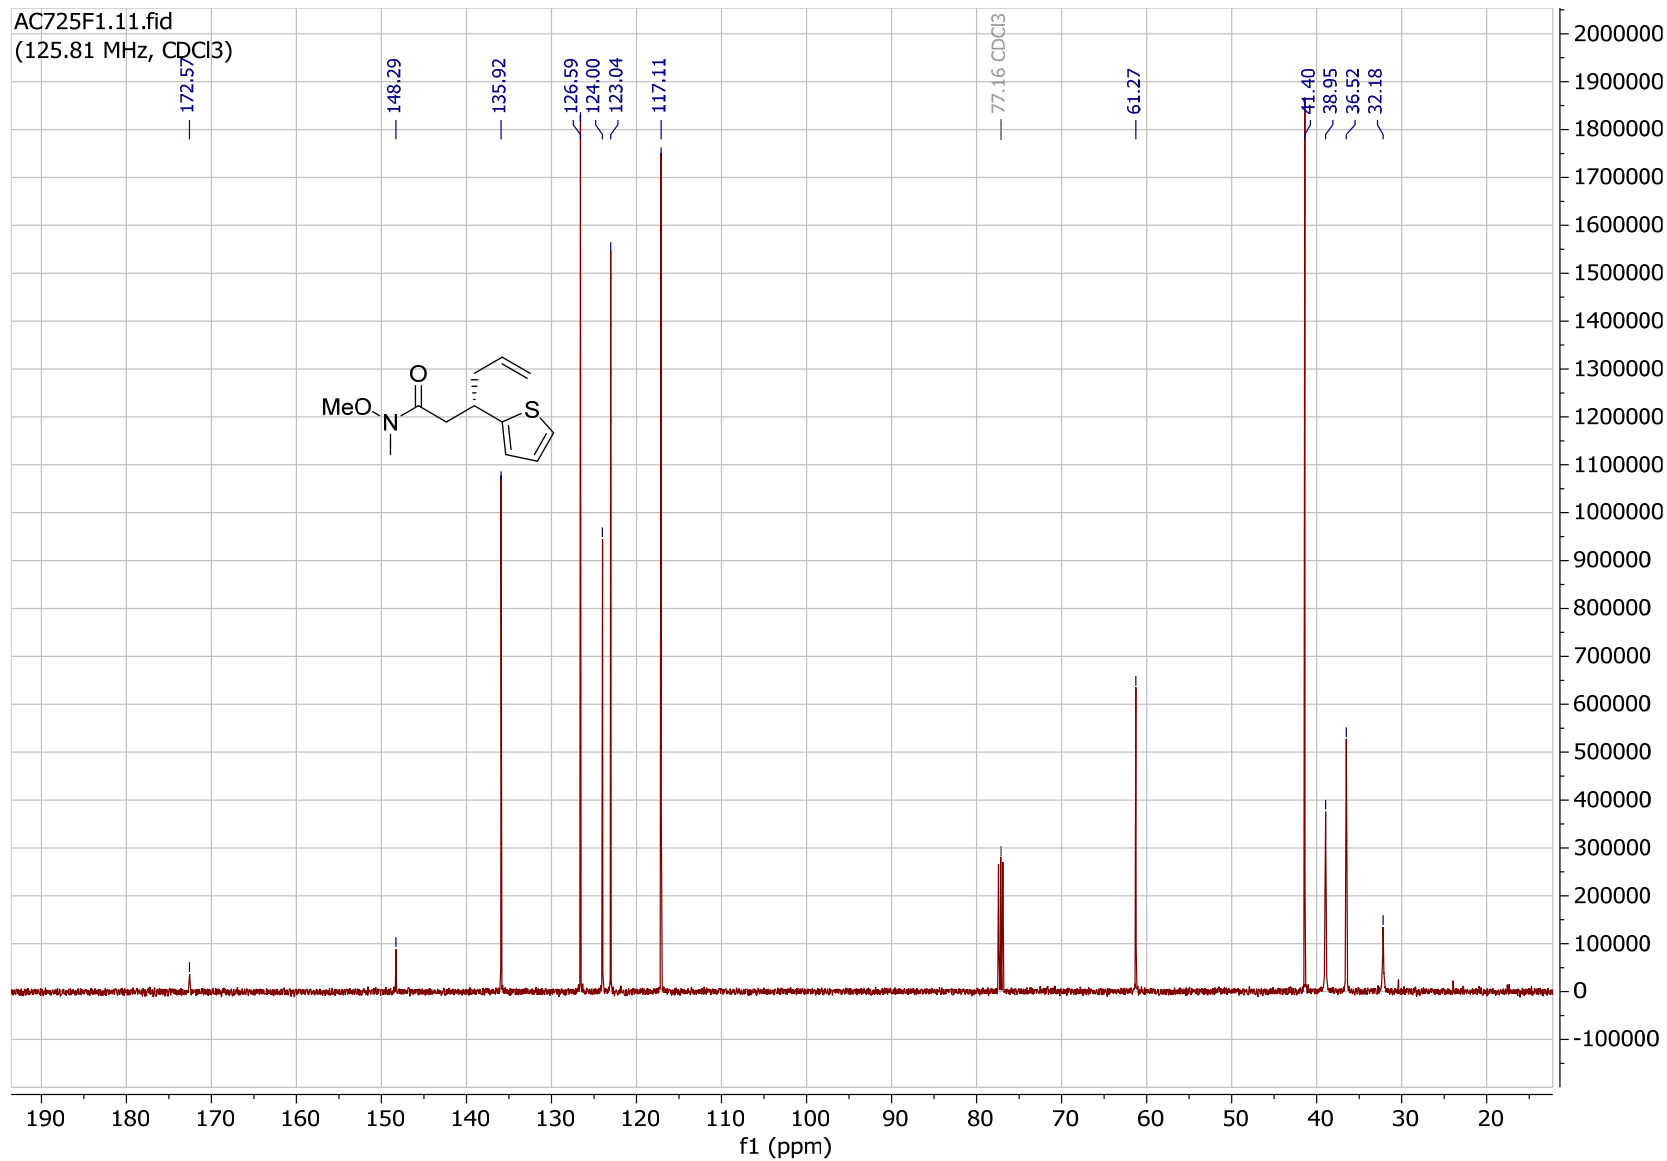

**(R)-3-[2-(Benzyloxy)ethyl]-N-methoxy-N-methylhex-5-enamide 1aI**

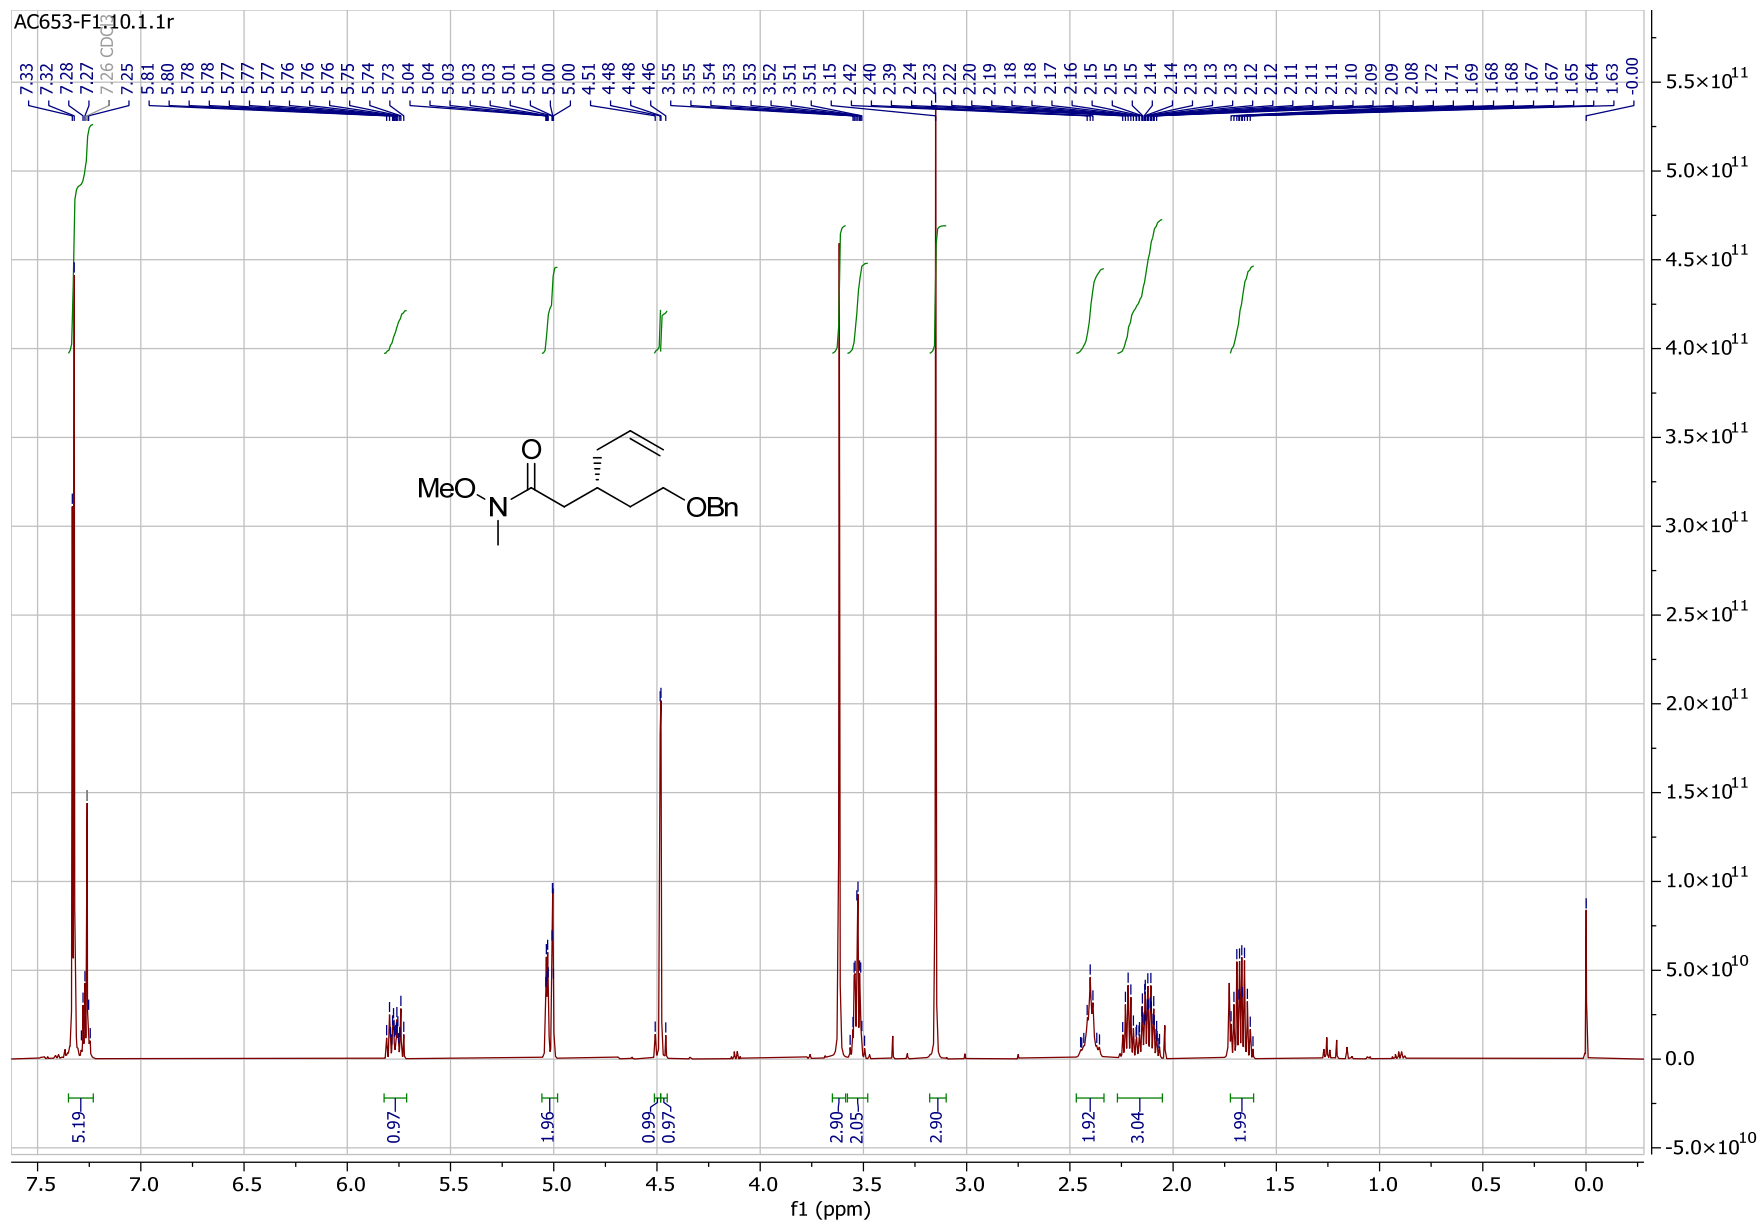

AC653-F1.11.1.1r

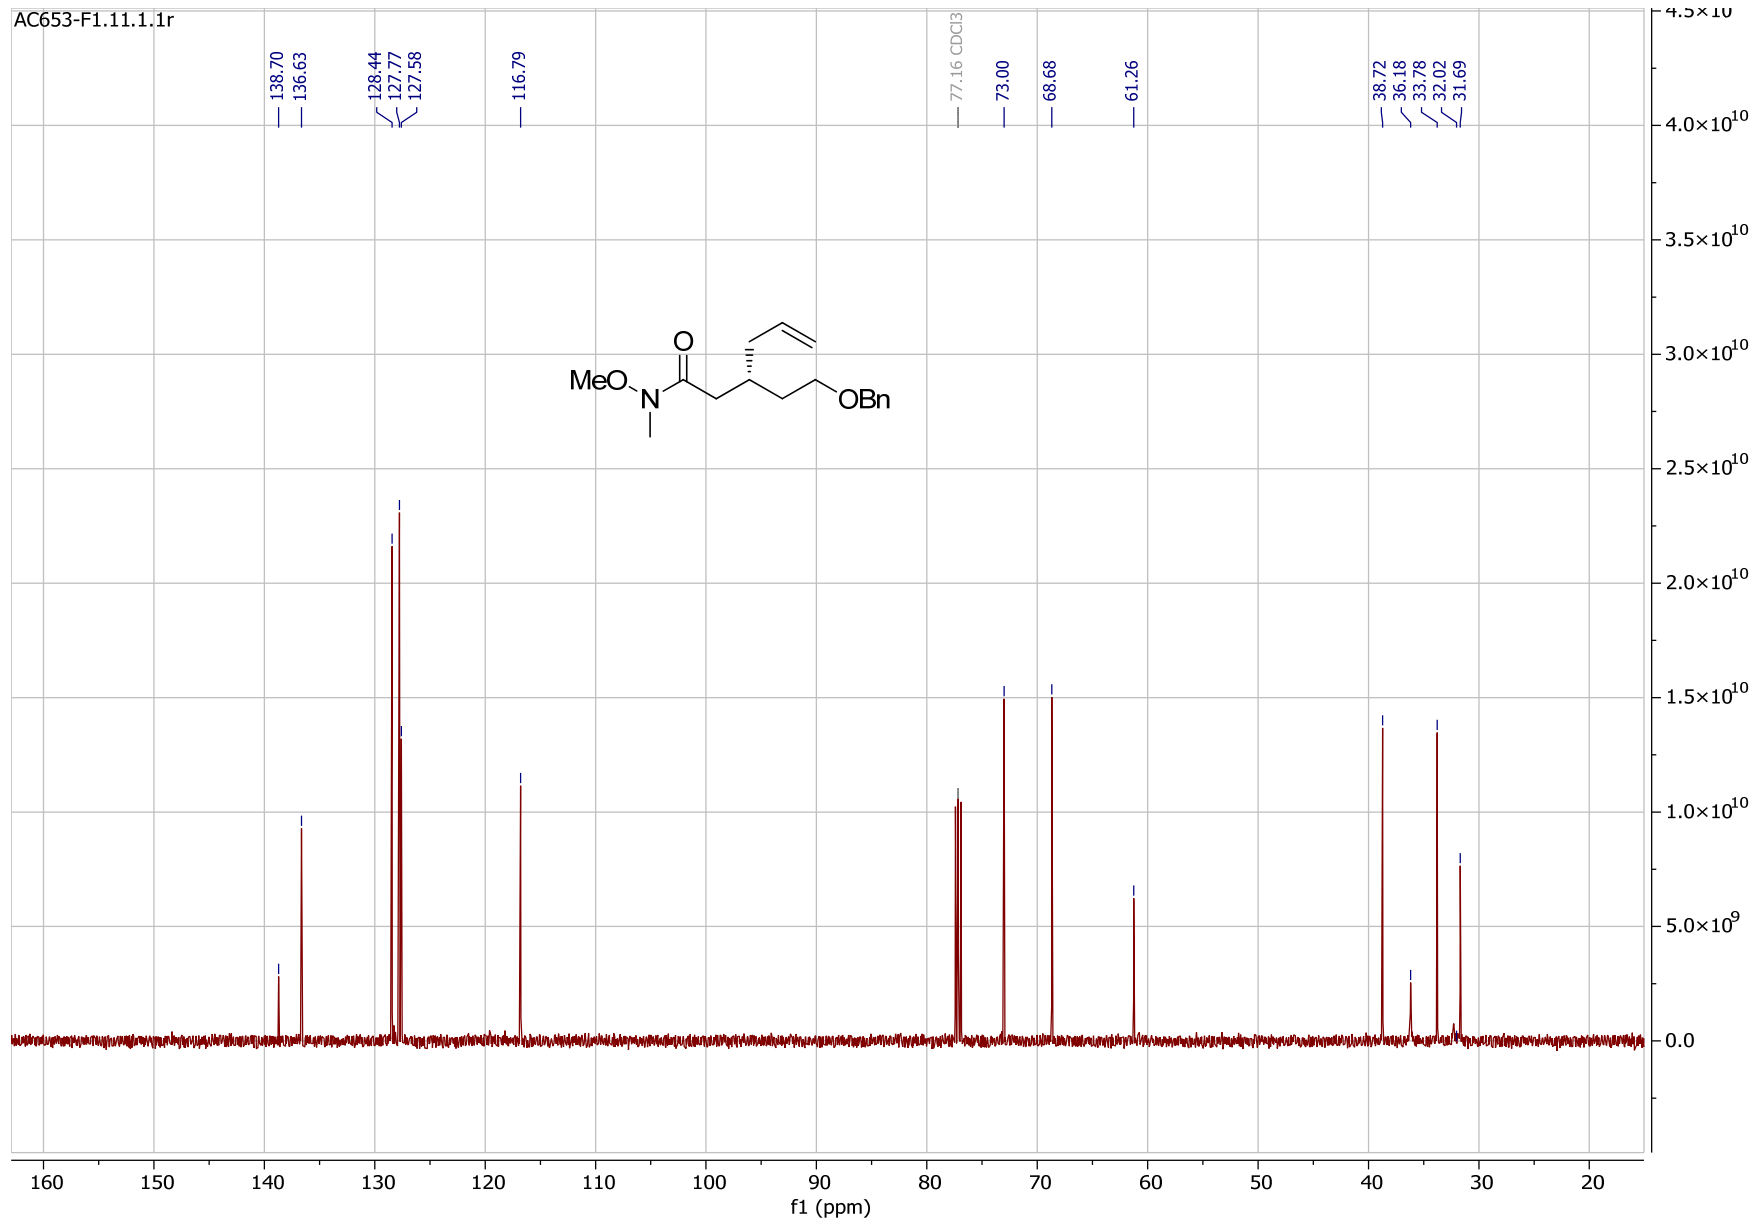

(S)-6-Bromo-3-phenylhexanal 2aa-Br

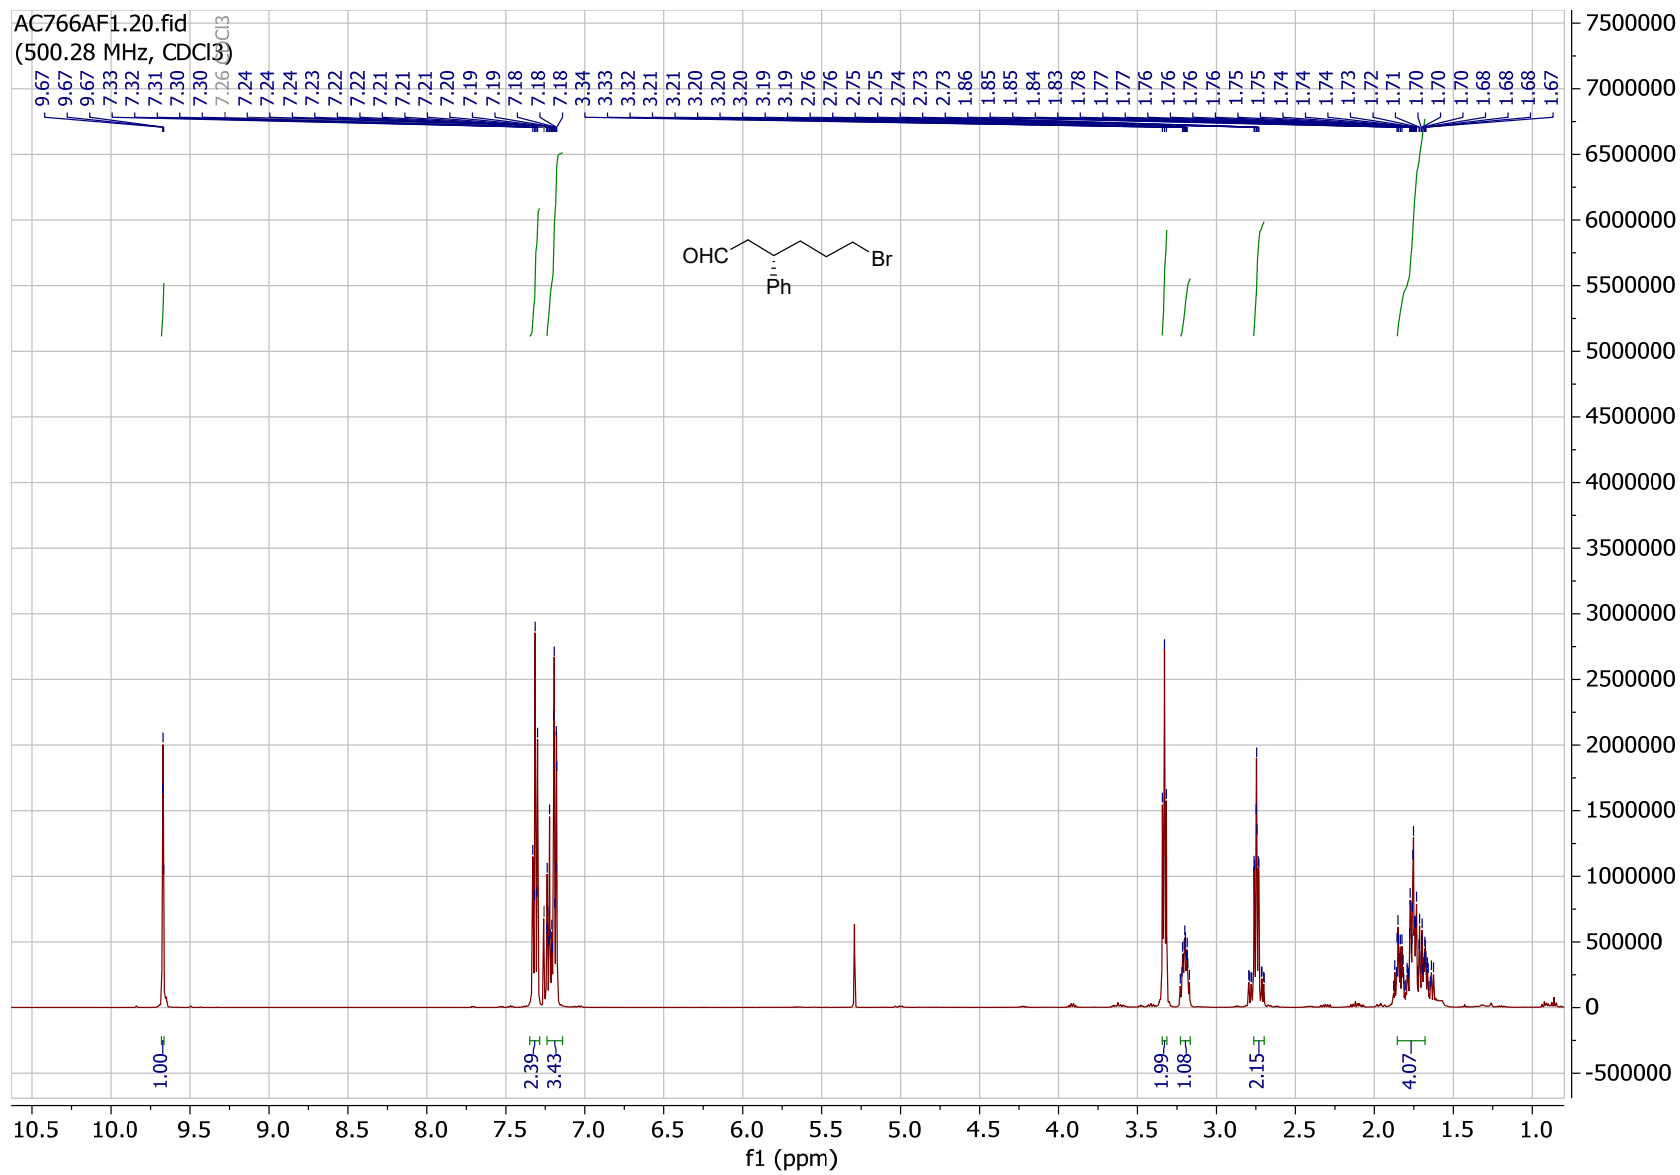

AC766AF1.21.fid  
(125.81 MHz, CDCl<sub>3</sub>)

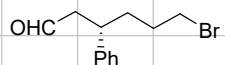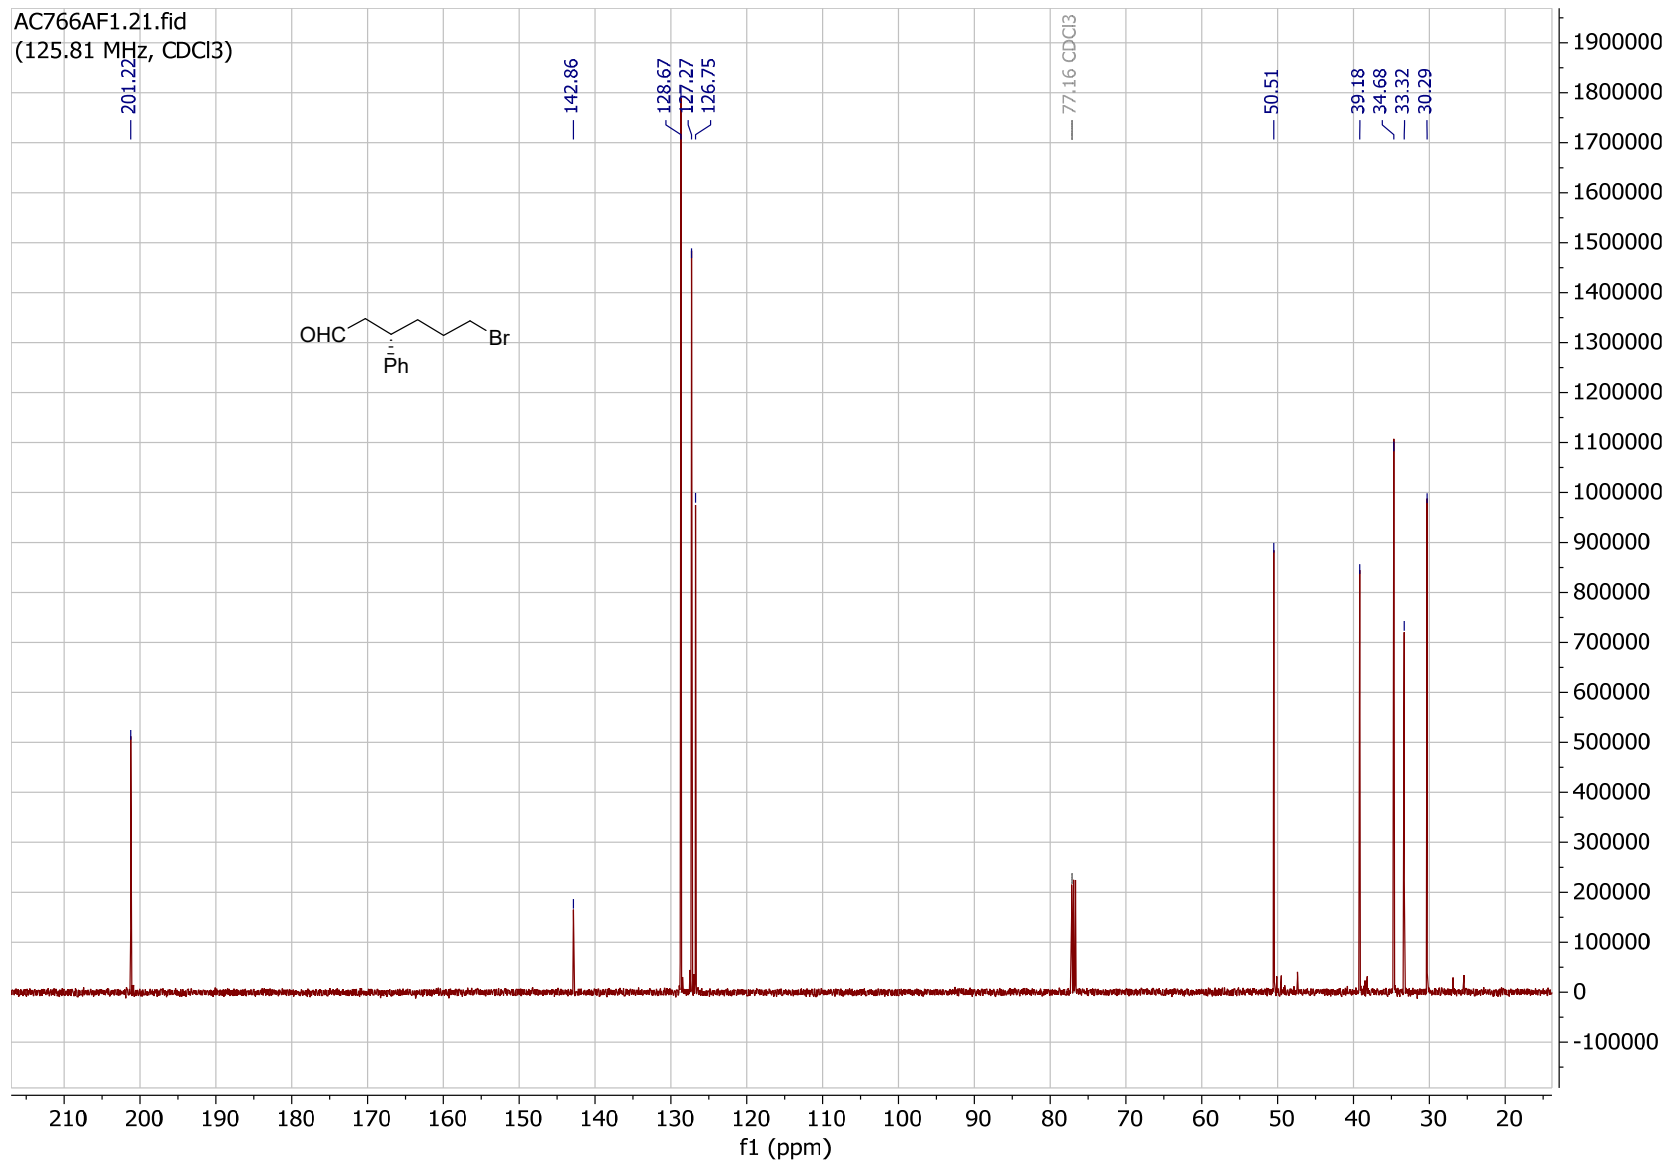

# 6-Iodo-3-phenylhexanal 2aa-I

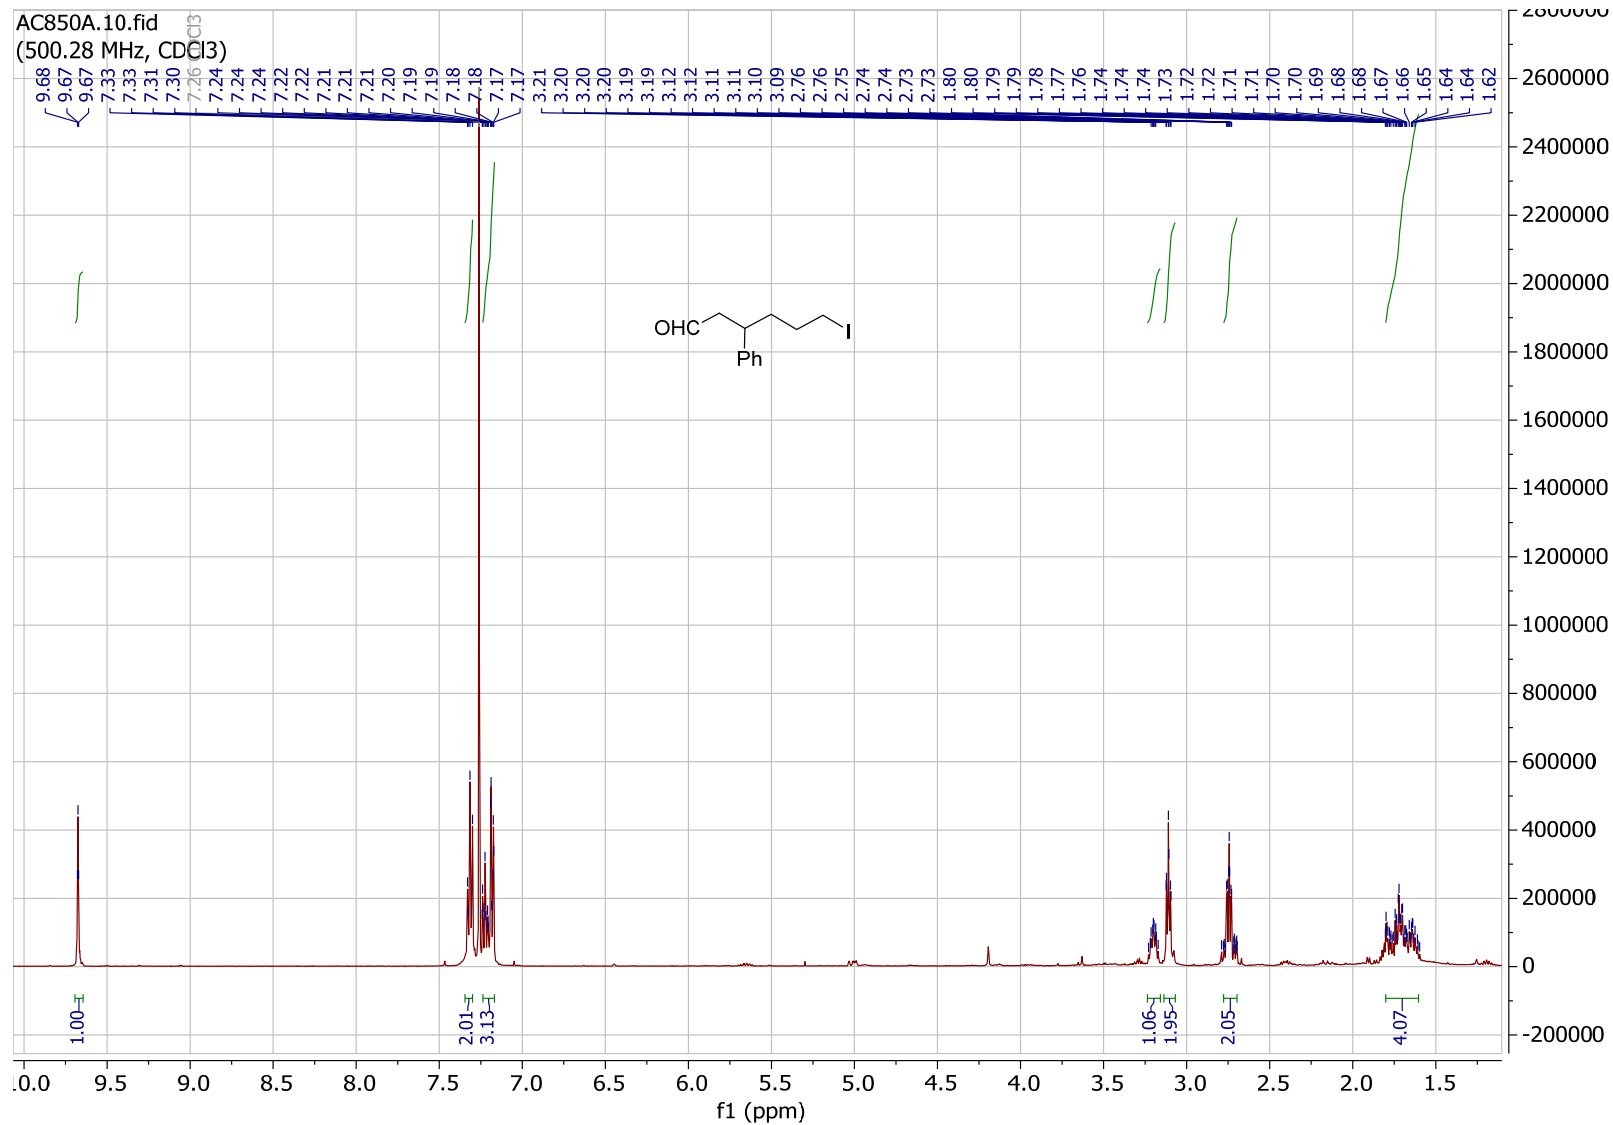

AC833AF1.11.fid  
(125.81 MHz, CDCl<sub>3</sub>)

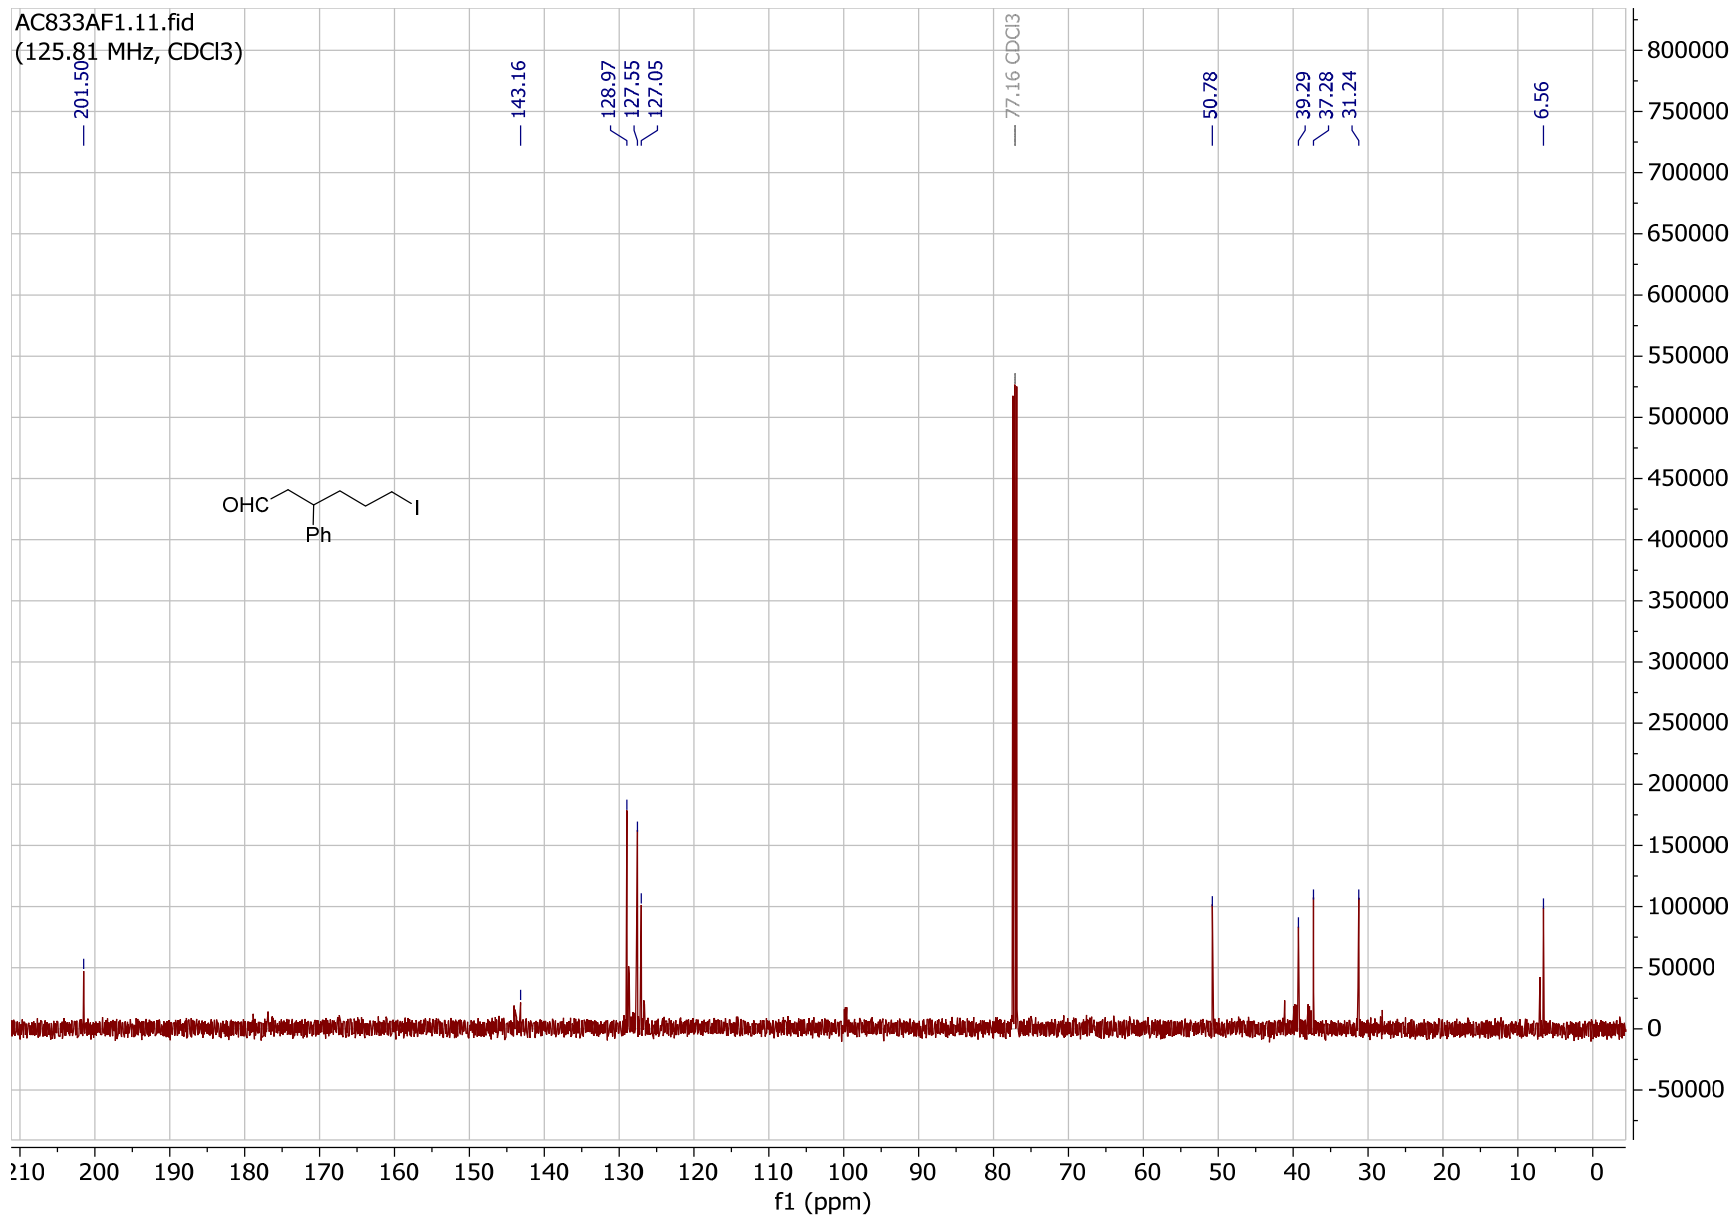

# 6-Bromo-3-(4-methoxyphenyl)hexanal 2ab

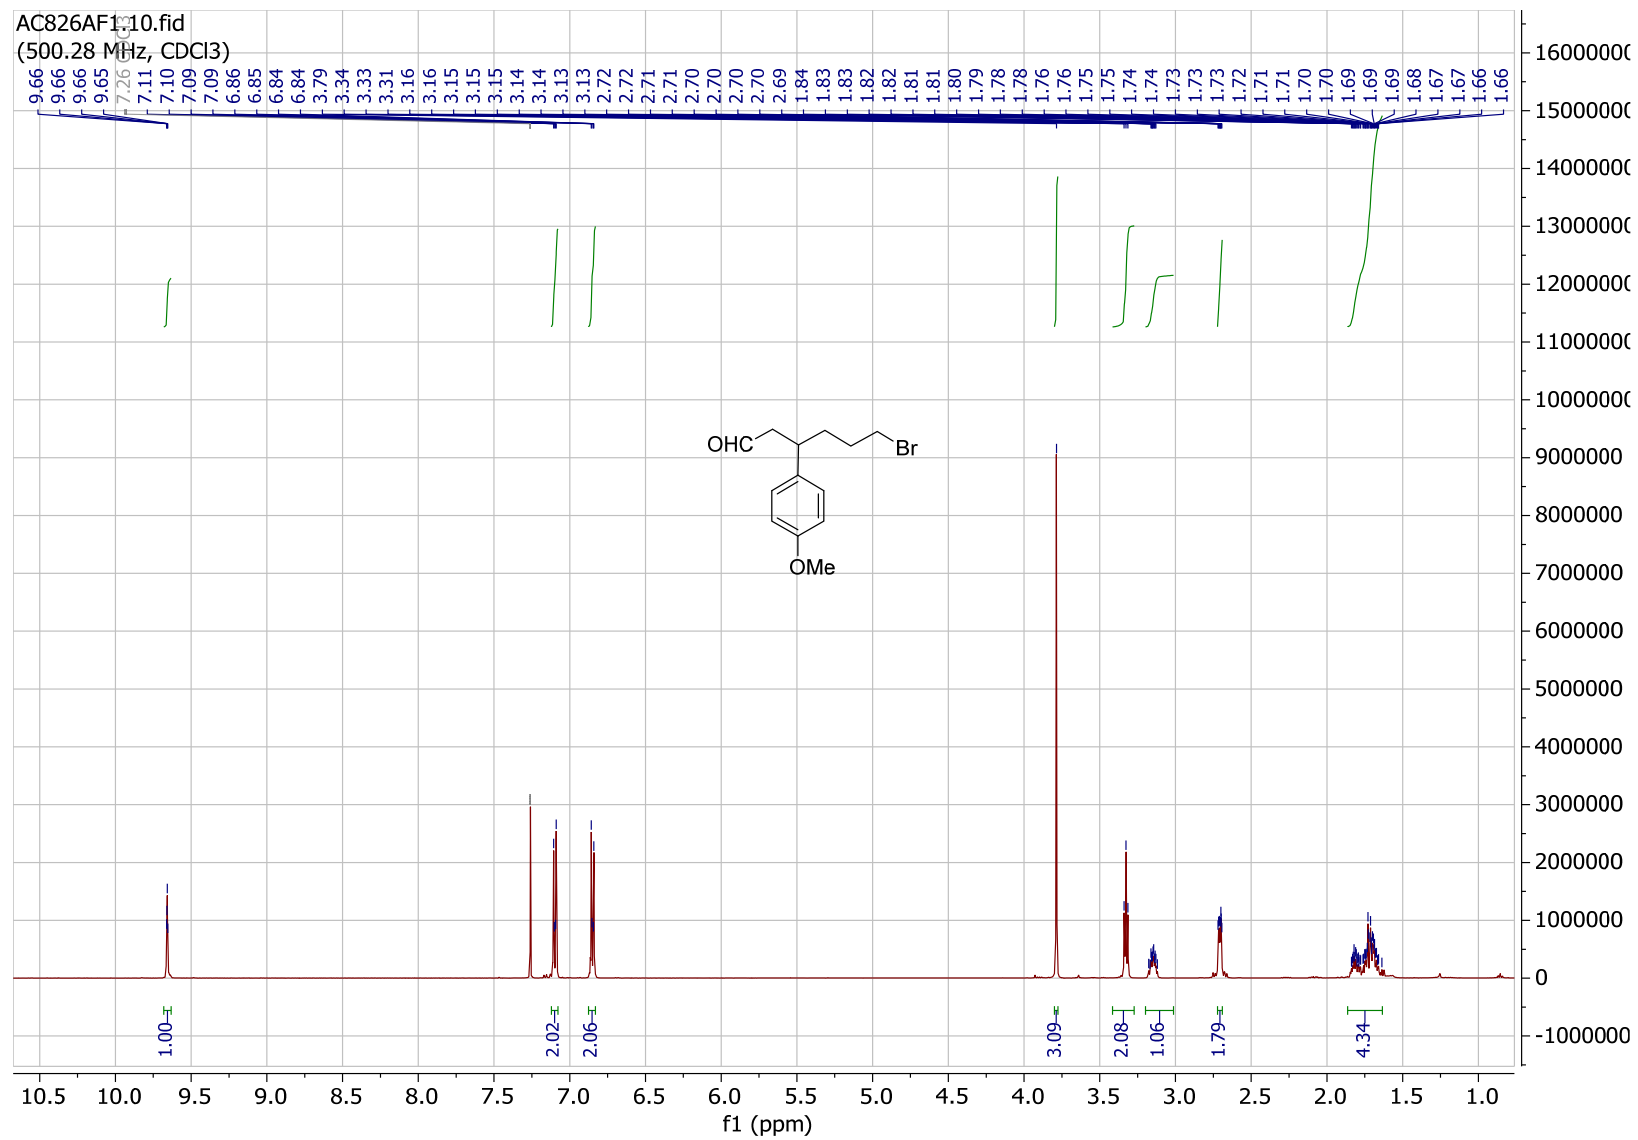



AC826AF1.11.fid  
(125.81 MHz, CDCl<sub>3</sub>)

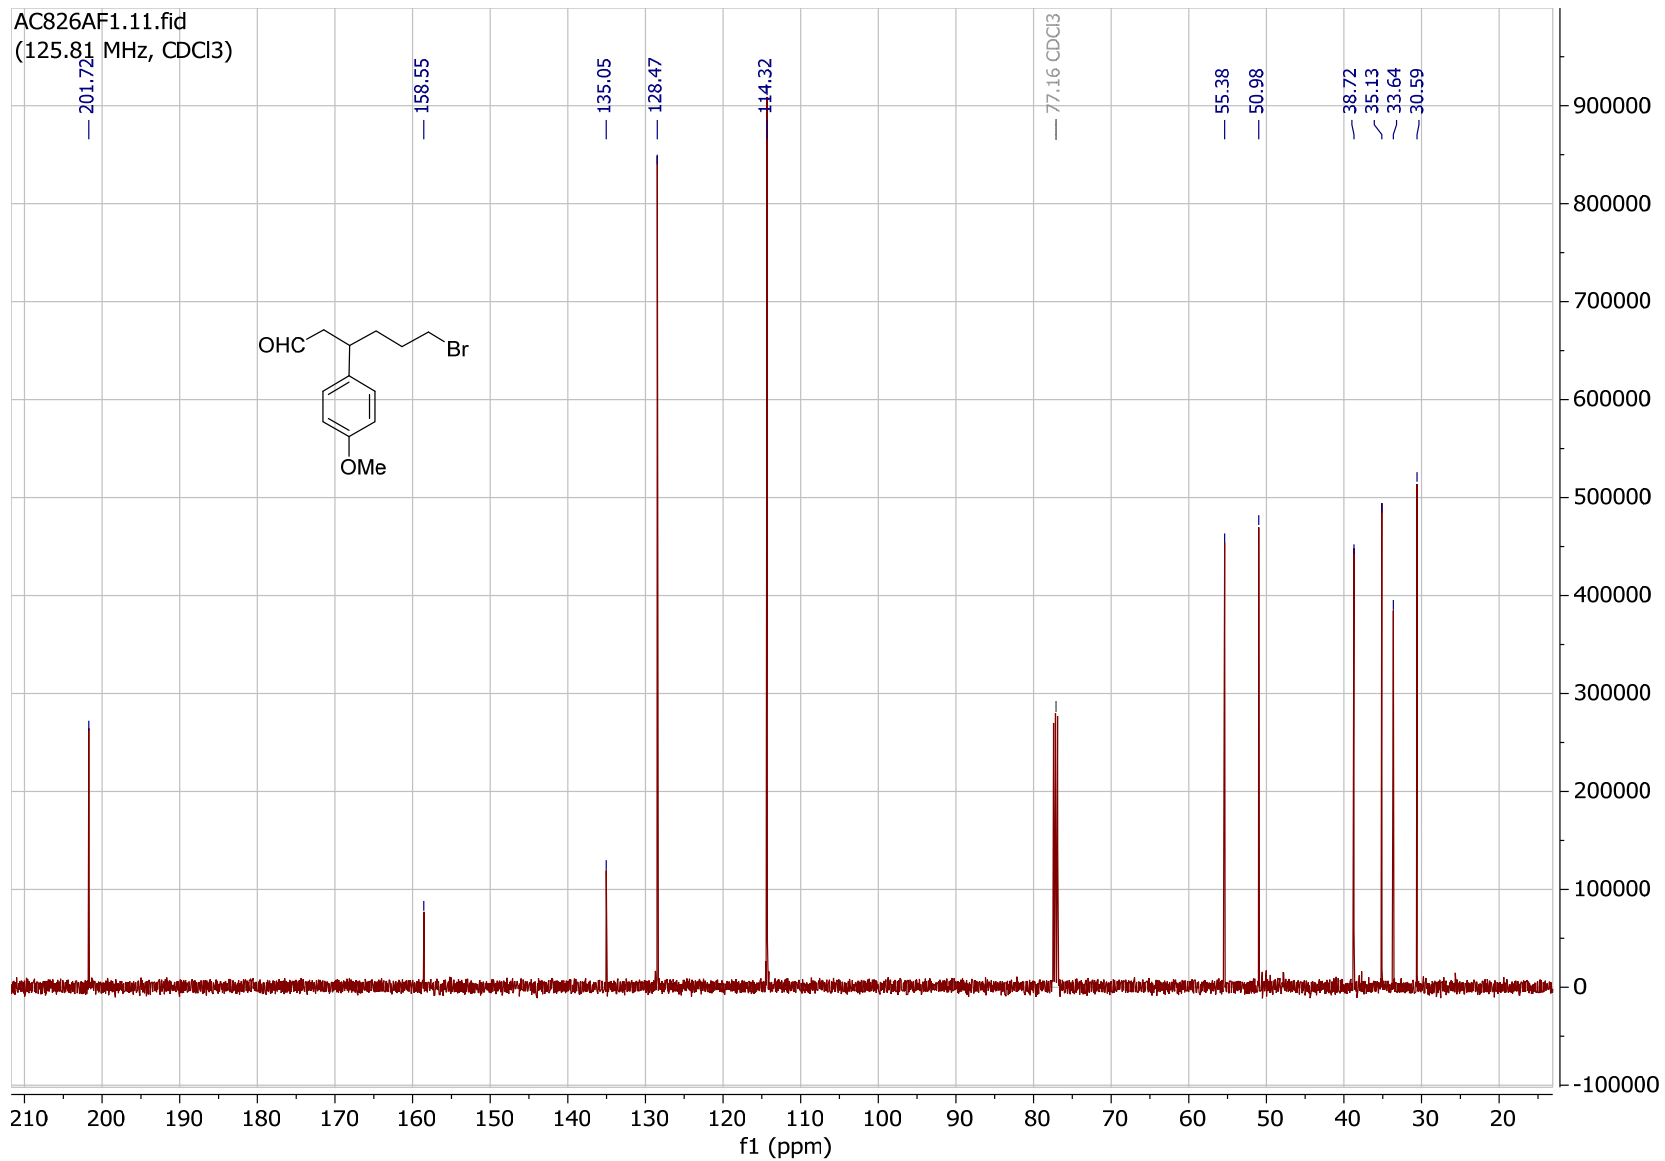

# 6-Bromo-3-(4-(trifluoromethyl)phenyl)hexanal 2ac

AC748AF1.10.fid  
(500.28 MHz, CDCl<sub>3</sub>)

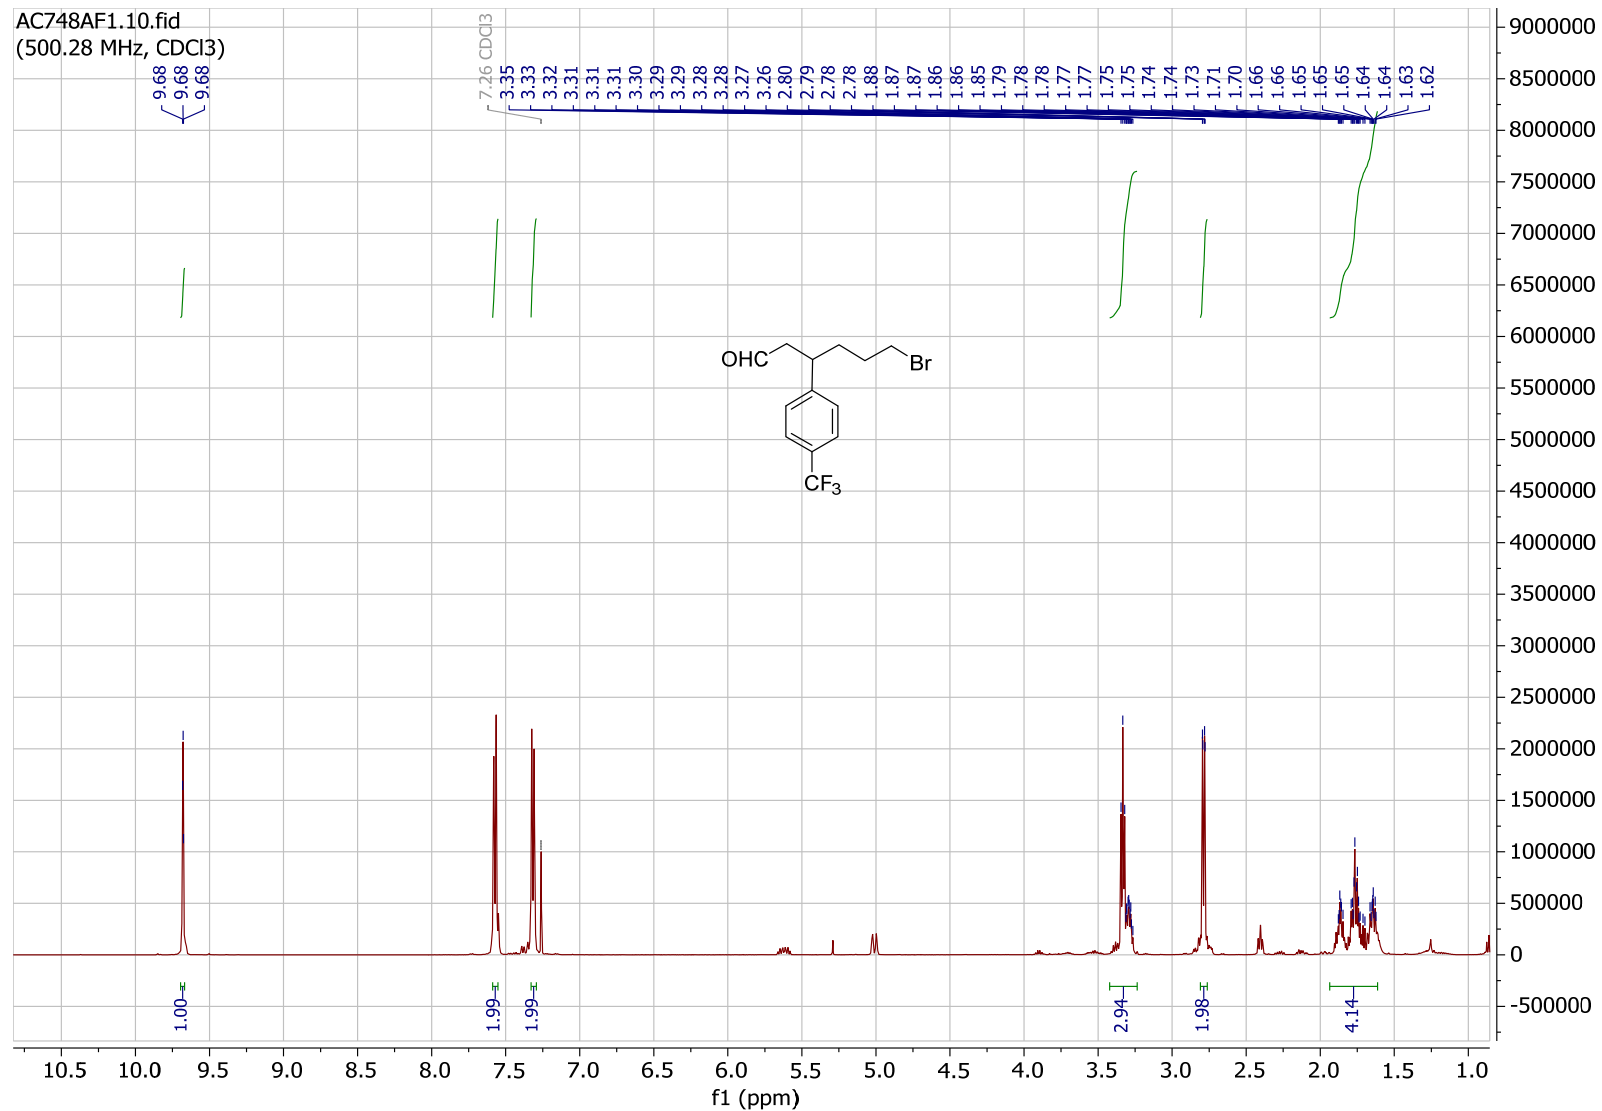

AC748AF1.11.fid  
(125.81 MHz, CDCl<sub>3</sub>)

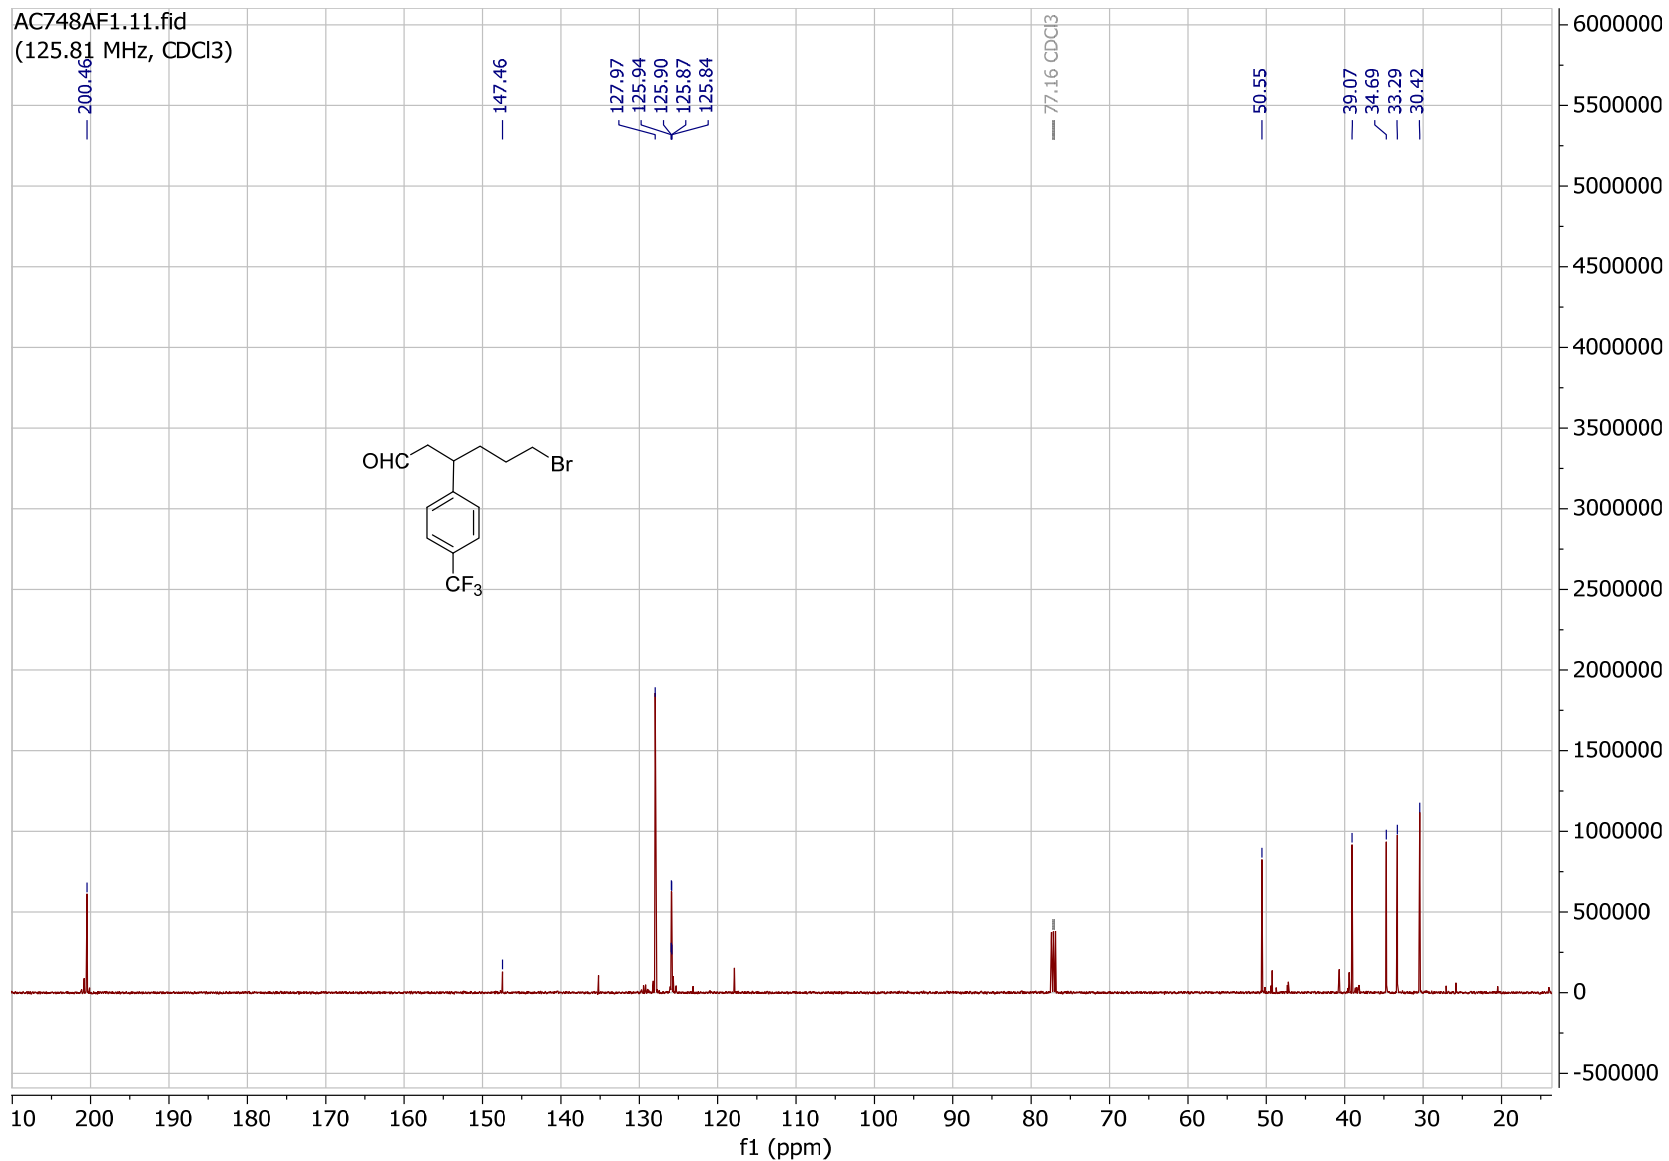

AC748AF1.12.fid  
(470.70 MHz, CDCl<sub>3</sub>)

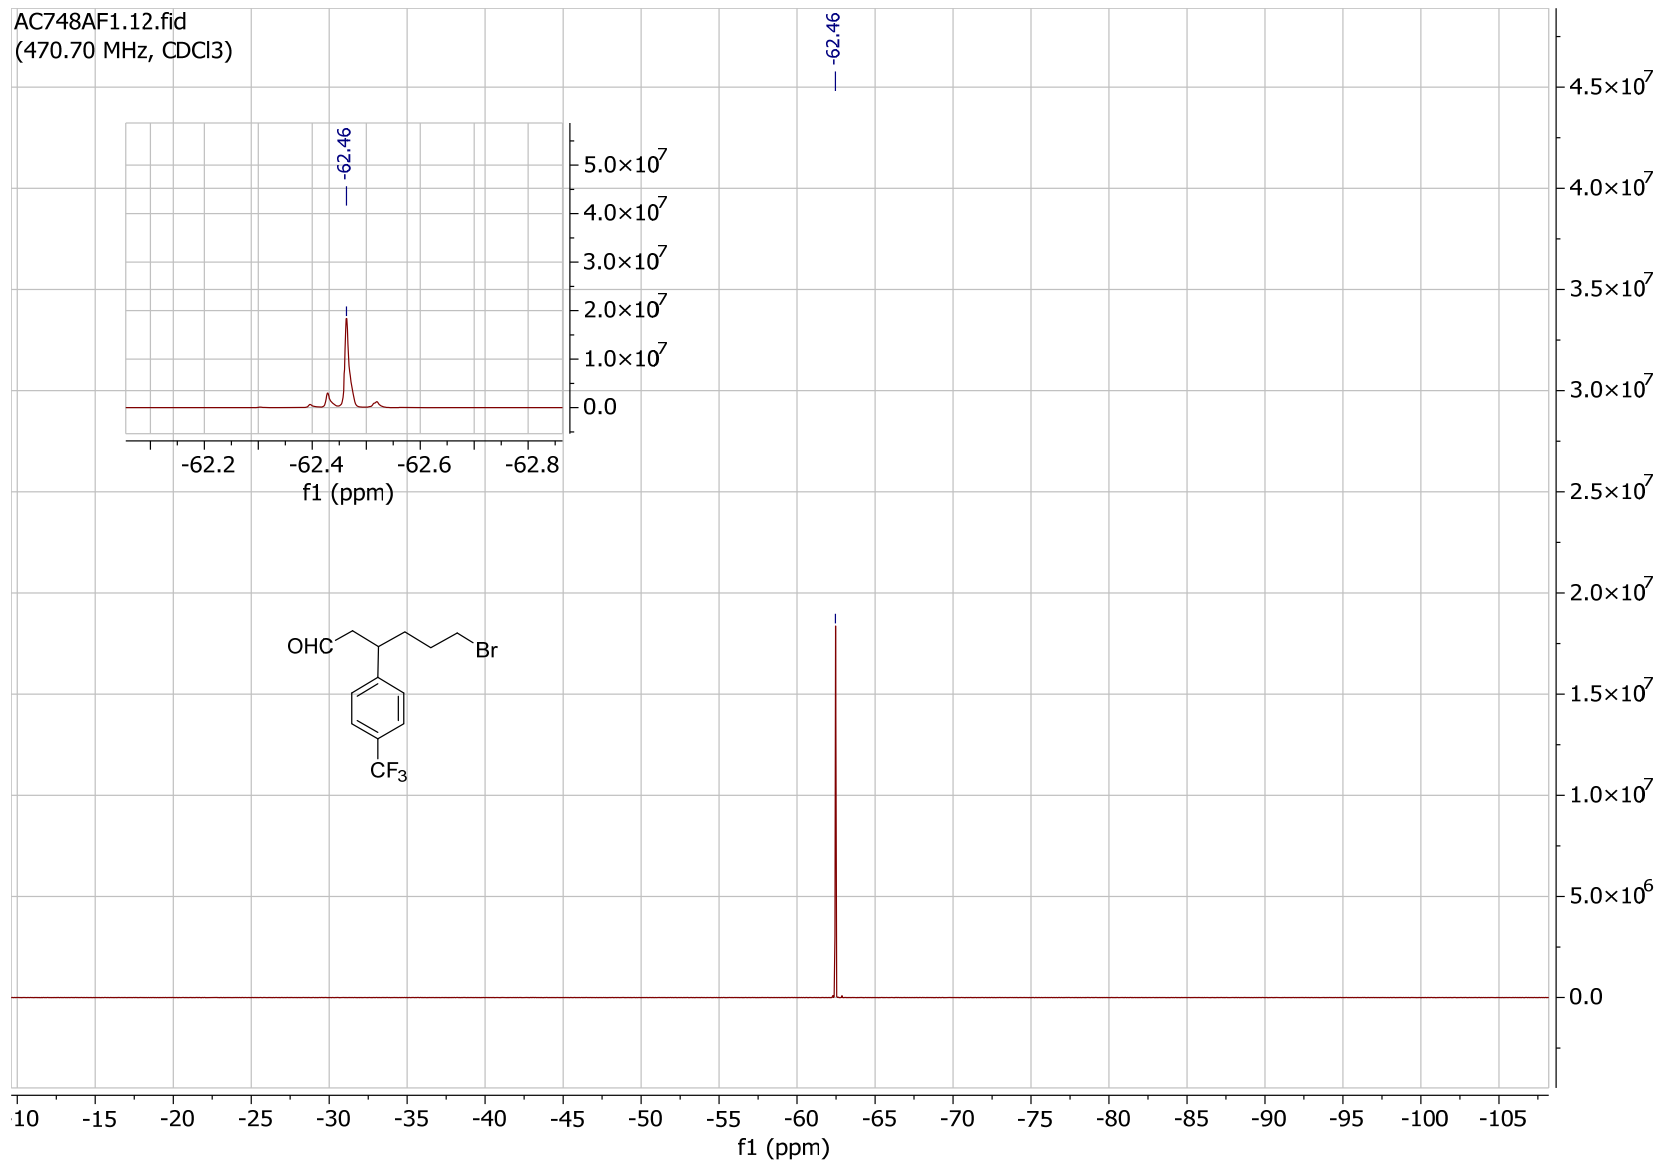

# 6-Bromo-3-(furan-2-yl)hexanal 2ad

AC774AF1.10.fid  
(500.28 MHz, CDCl<sub>3</sub>)

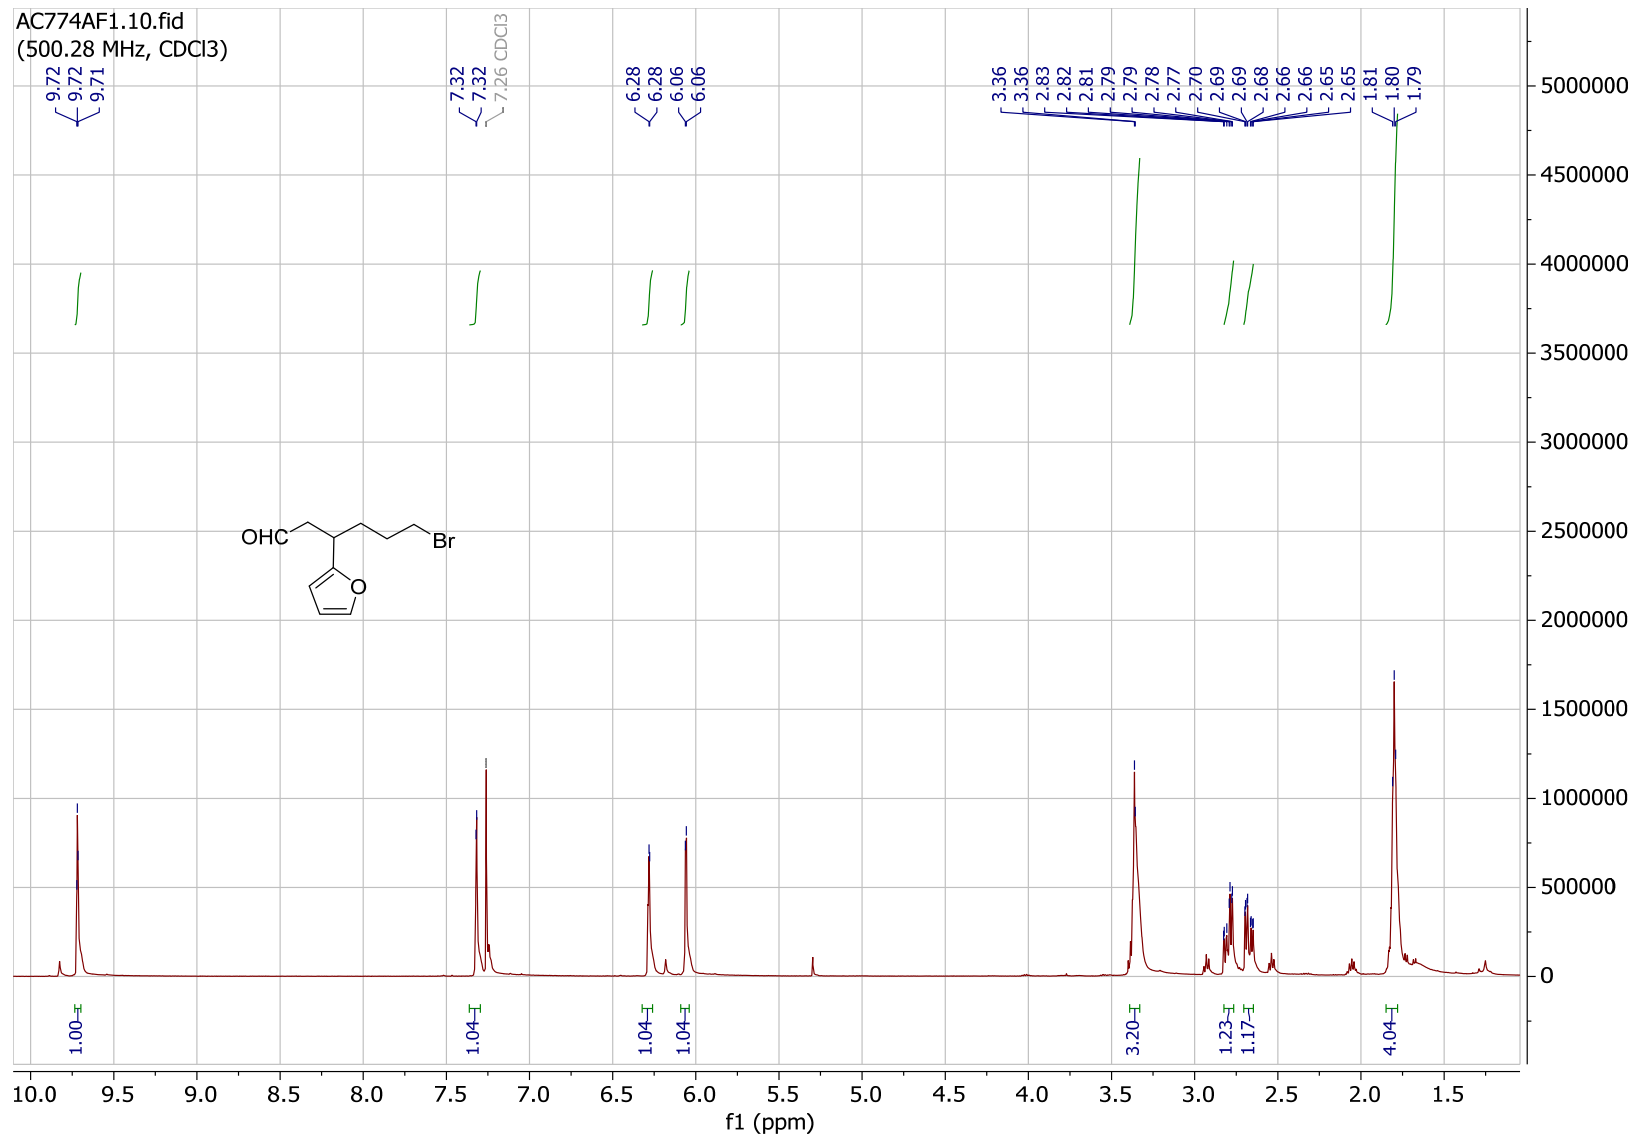

AC774AF1.11.fid  
(125.81 MHz, CDCl<sub>3</sub>)

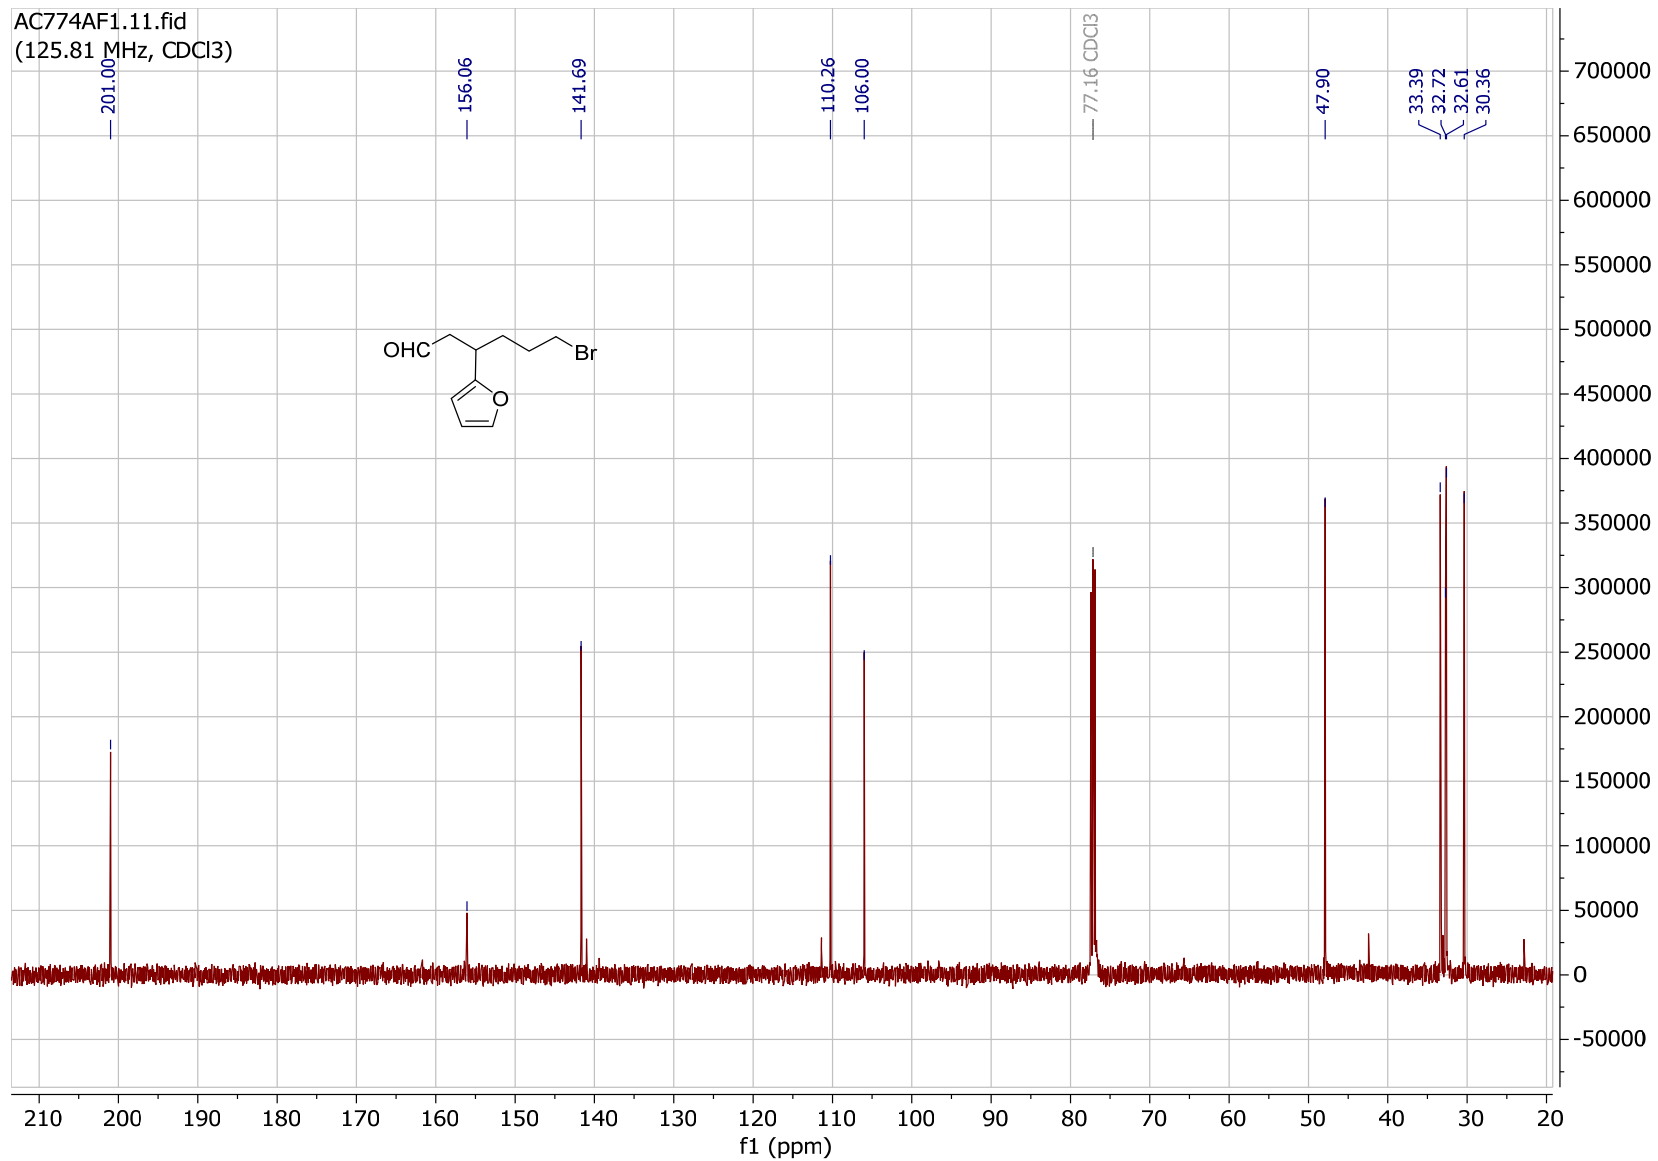

# 6-Bromo-3-isopropylhexanal 2ae

AC801AF1.10.fid  
(500.28 MHz, CDCl<sub>3</sub>)

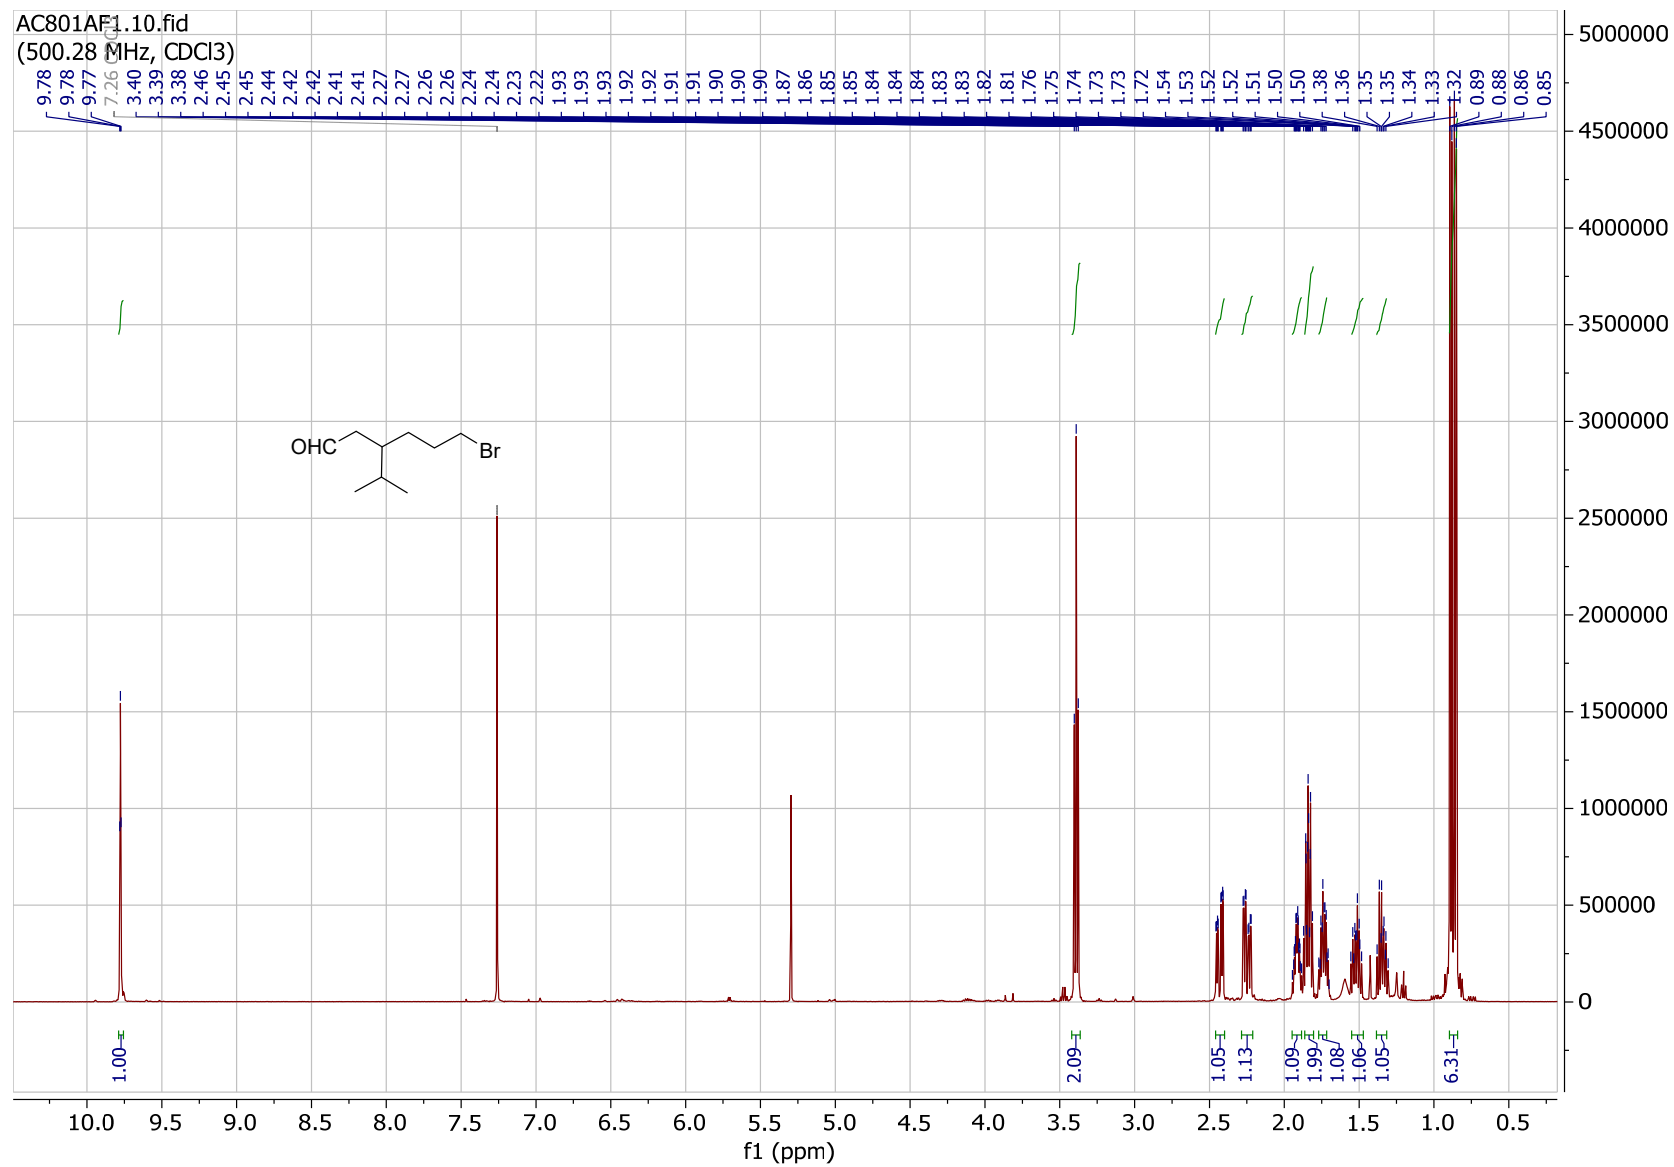

AC801AF1.11.fid  
(125.81 MHz, CDCl<sub>3</sub>)

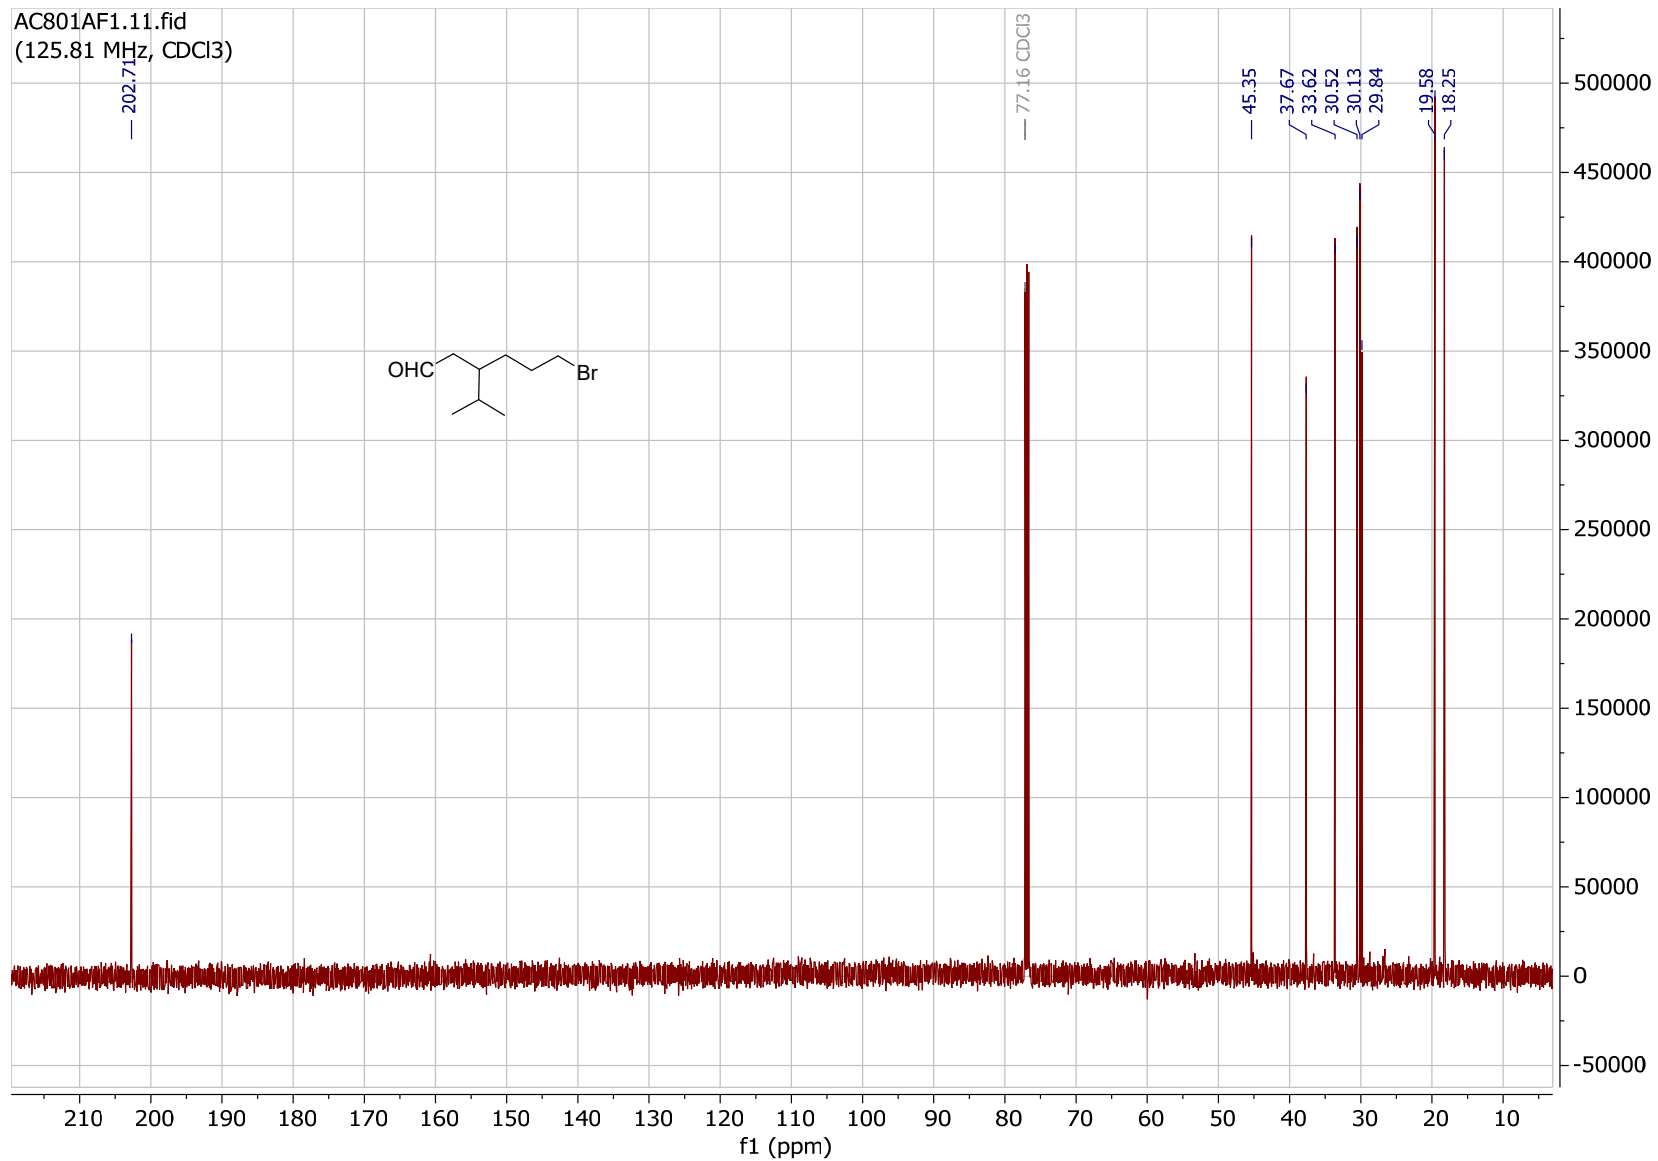



# 6-Bromo-3-phenethylhexanal 2af

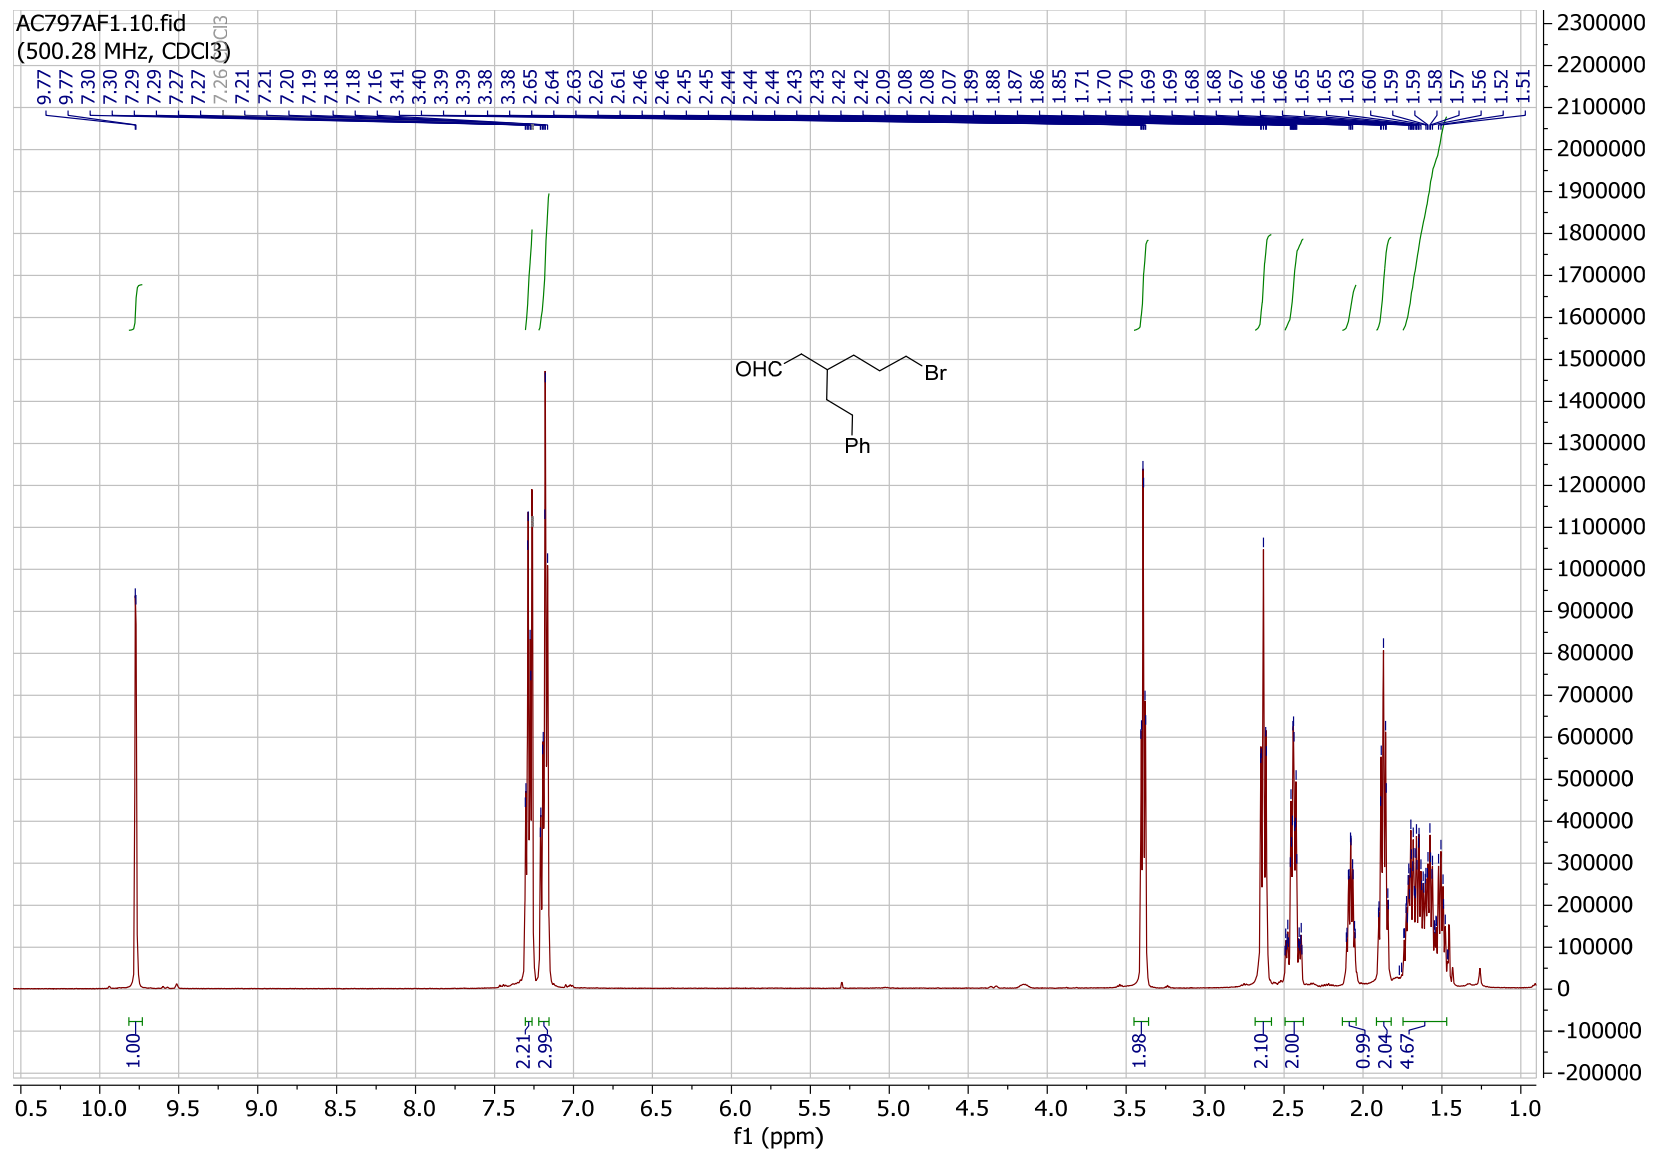

AC797AF1.11.fid  
(125.81 MHz, CDCl<sub>3</sub>)

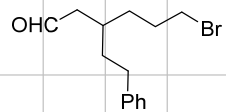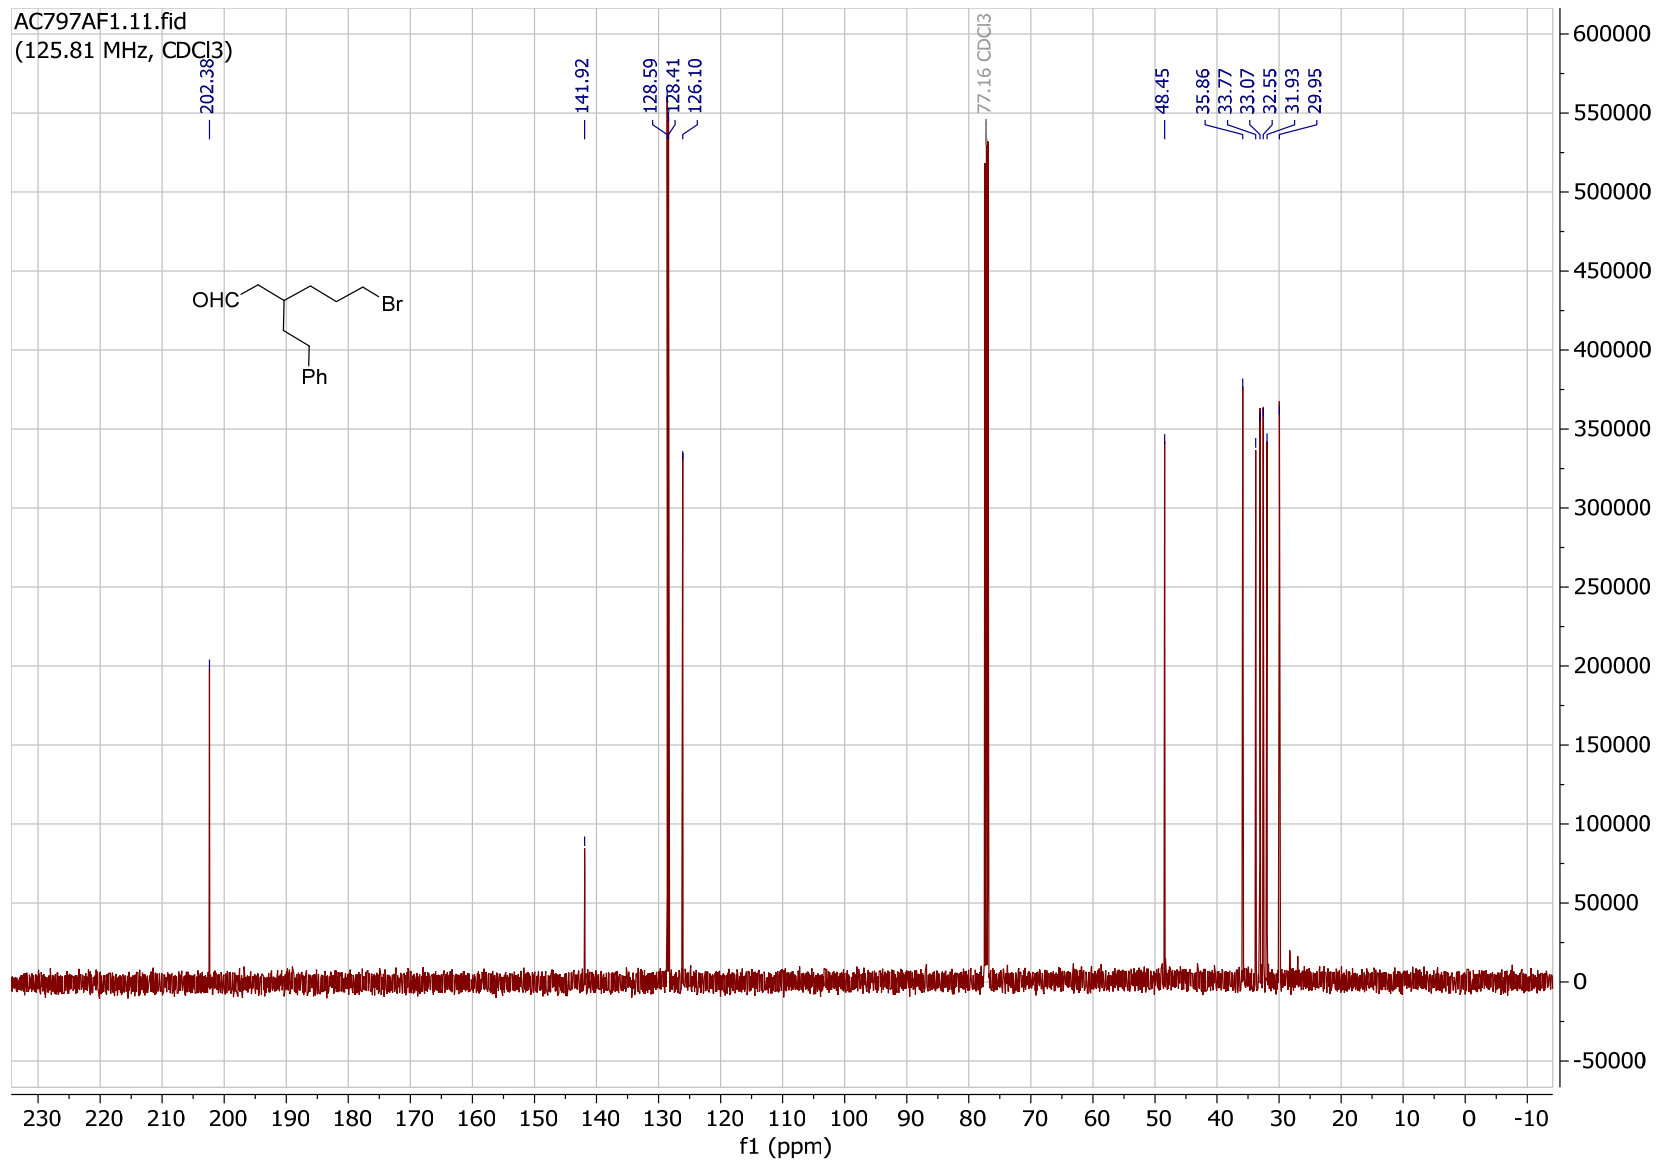

**(E)-3-(3-Bromopropyl)-4,4-dimethyl-7-phenylhept-6-enal 2ag**

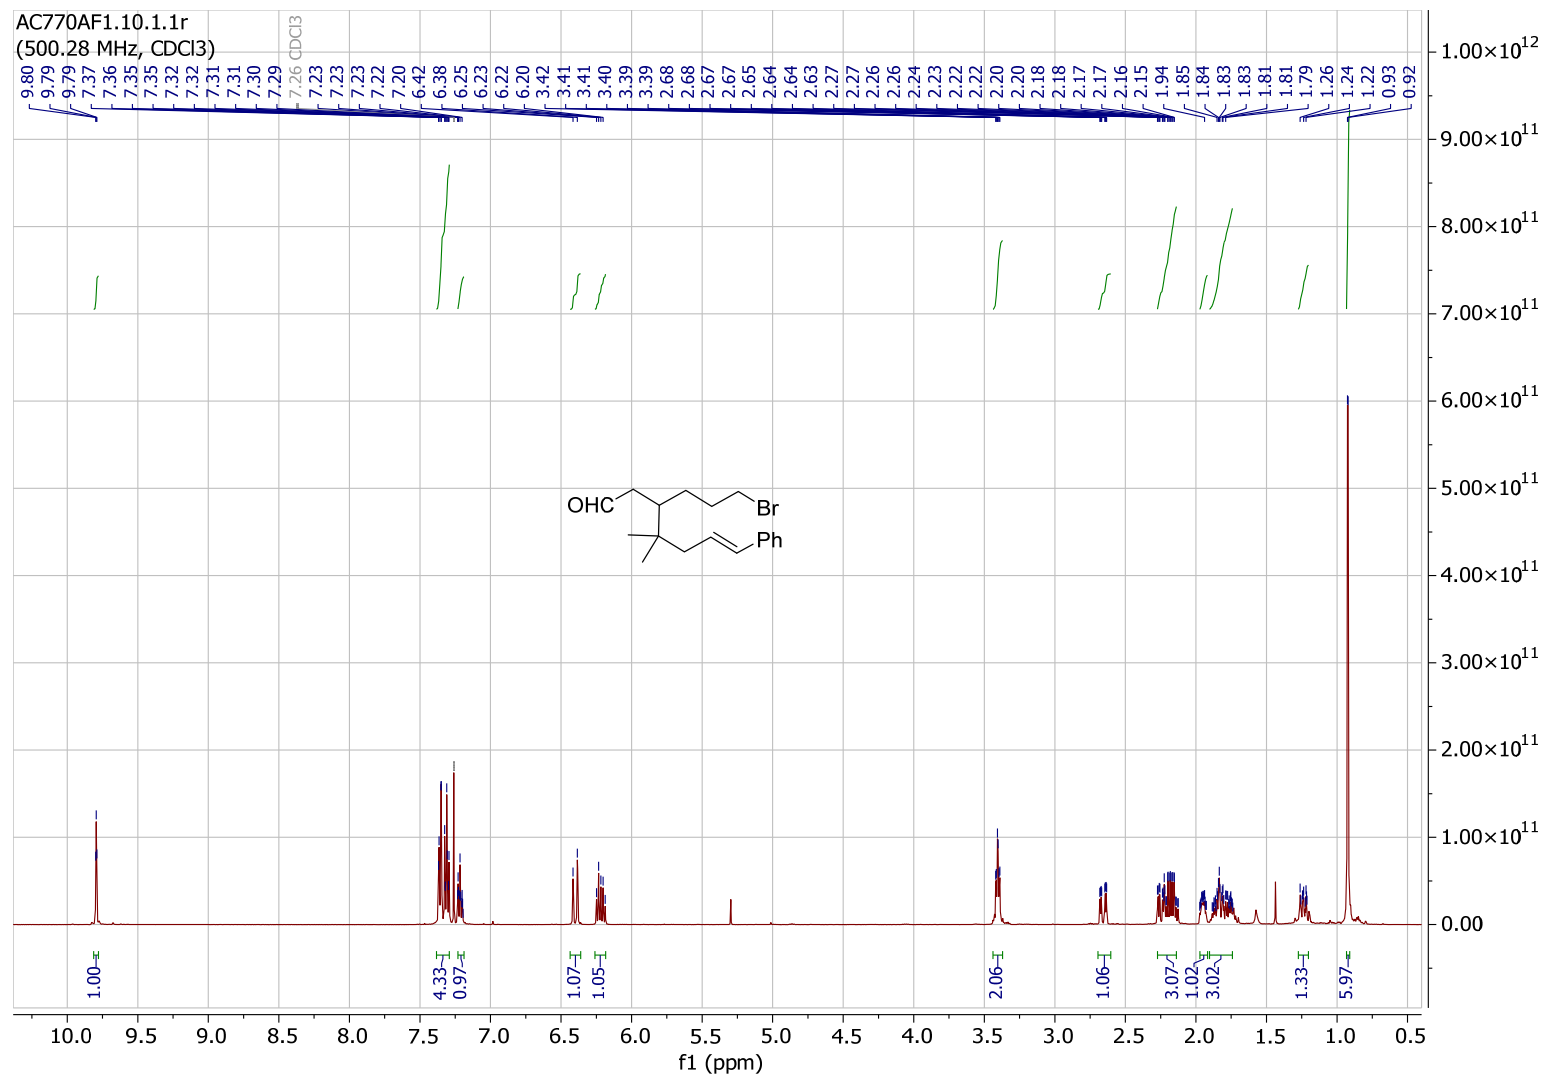

AC770AF1.11.fid  
(125.81 MHz, CDCl<sub>3</sub>)

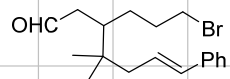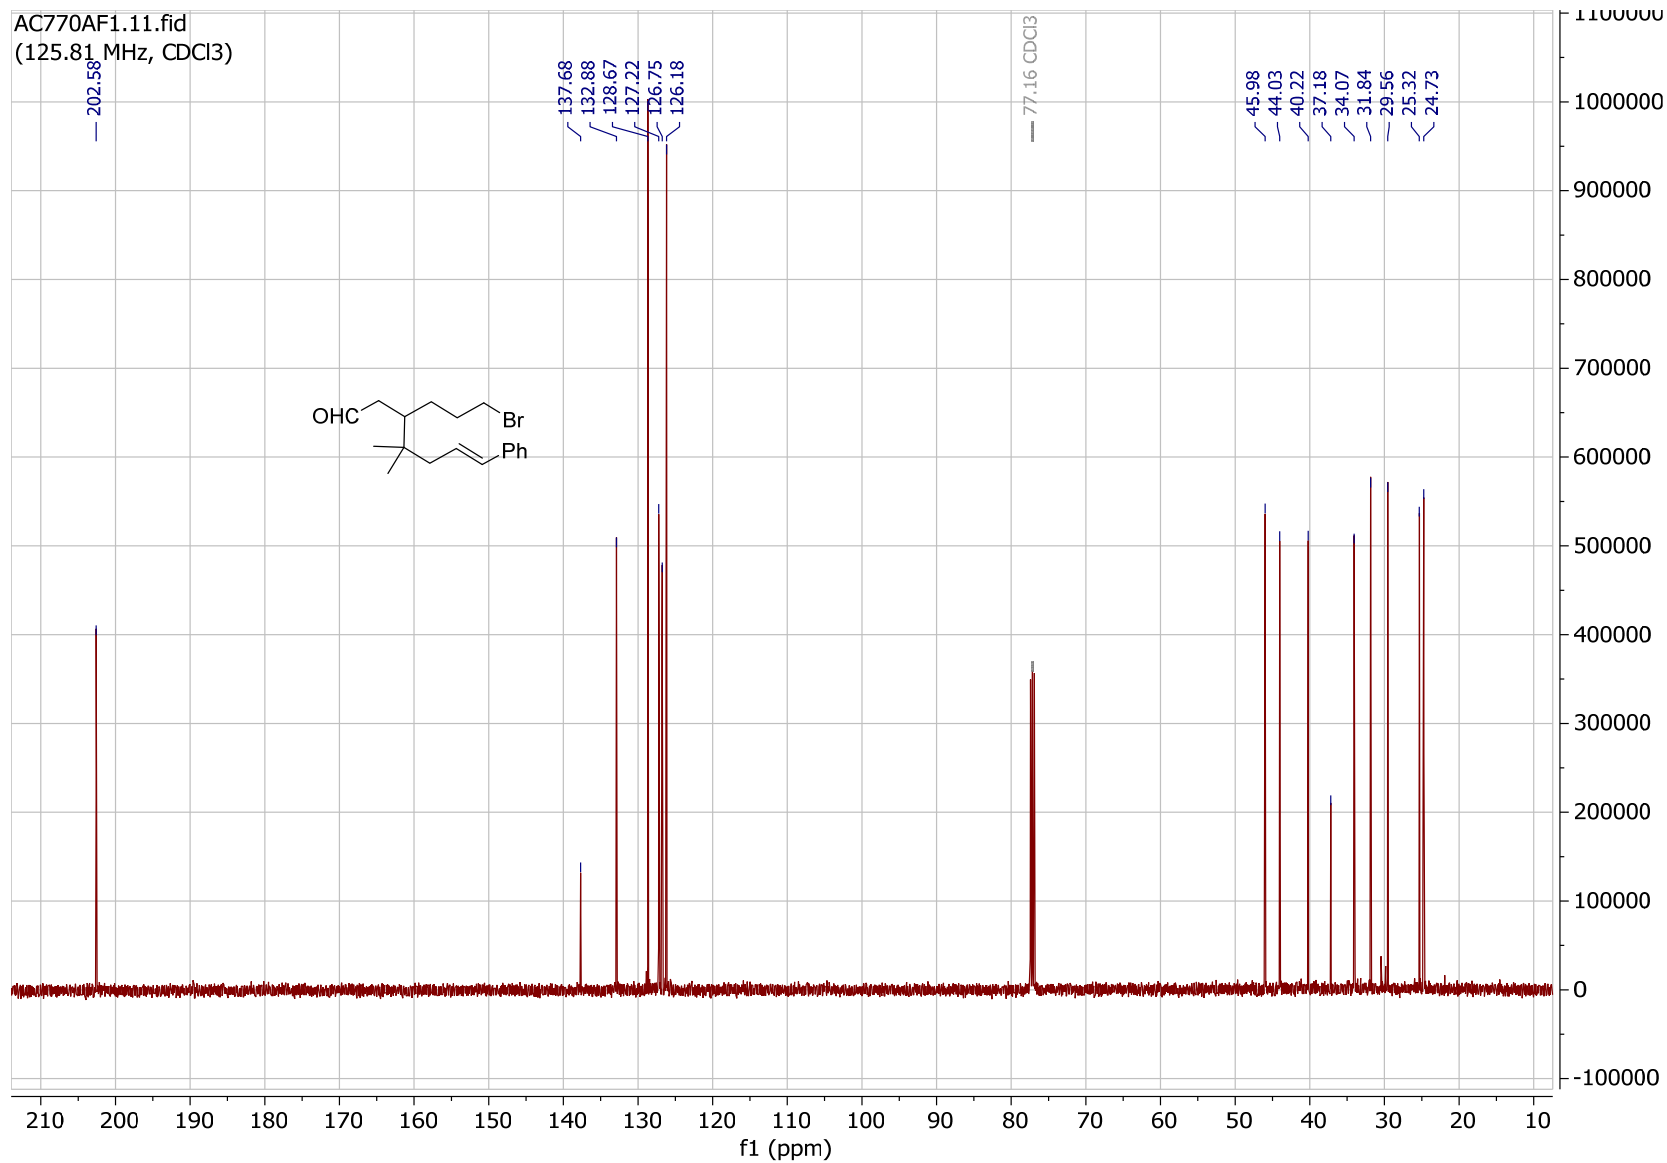

(S)-2-Benzyl-5-bromopentanal 2ba-Br

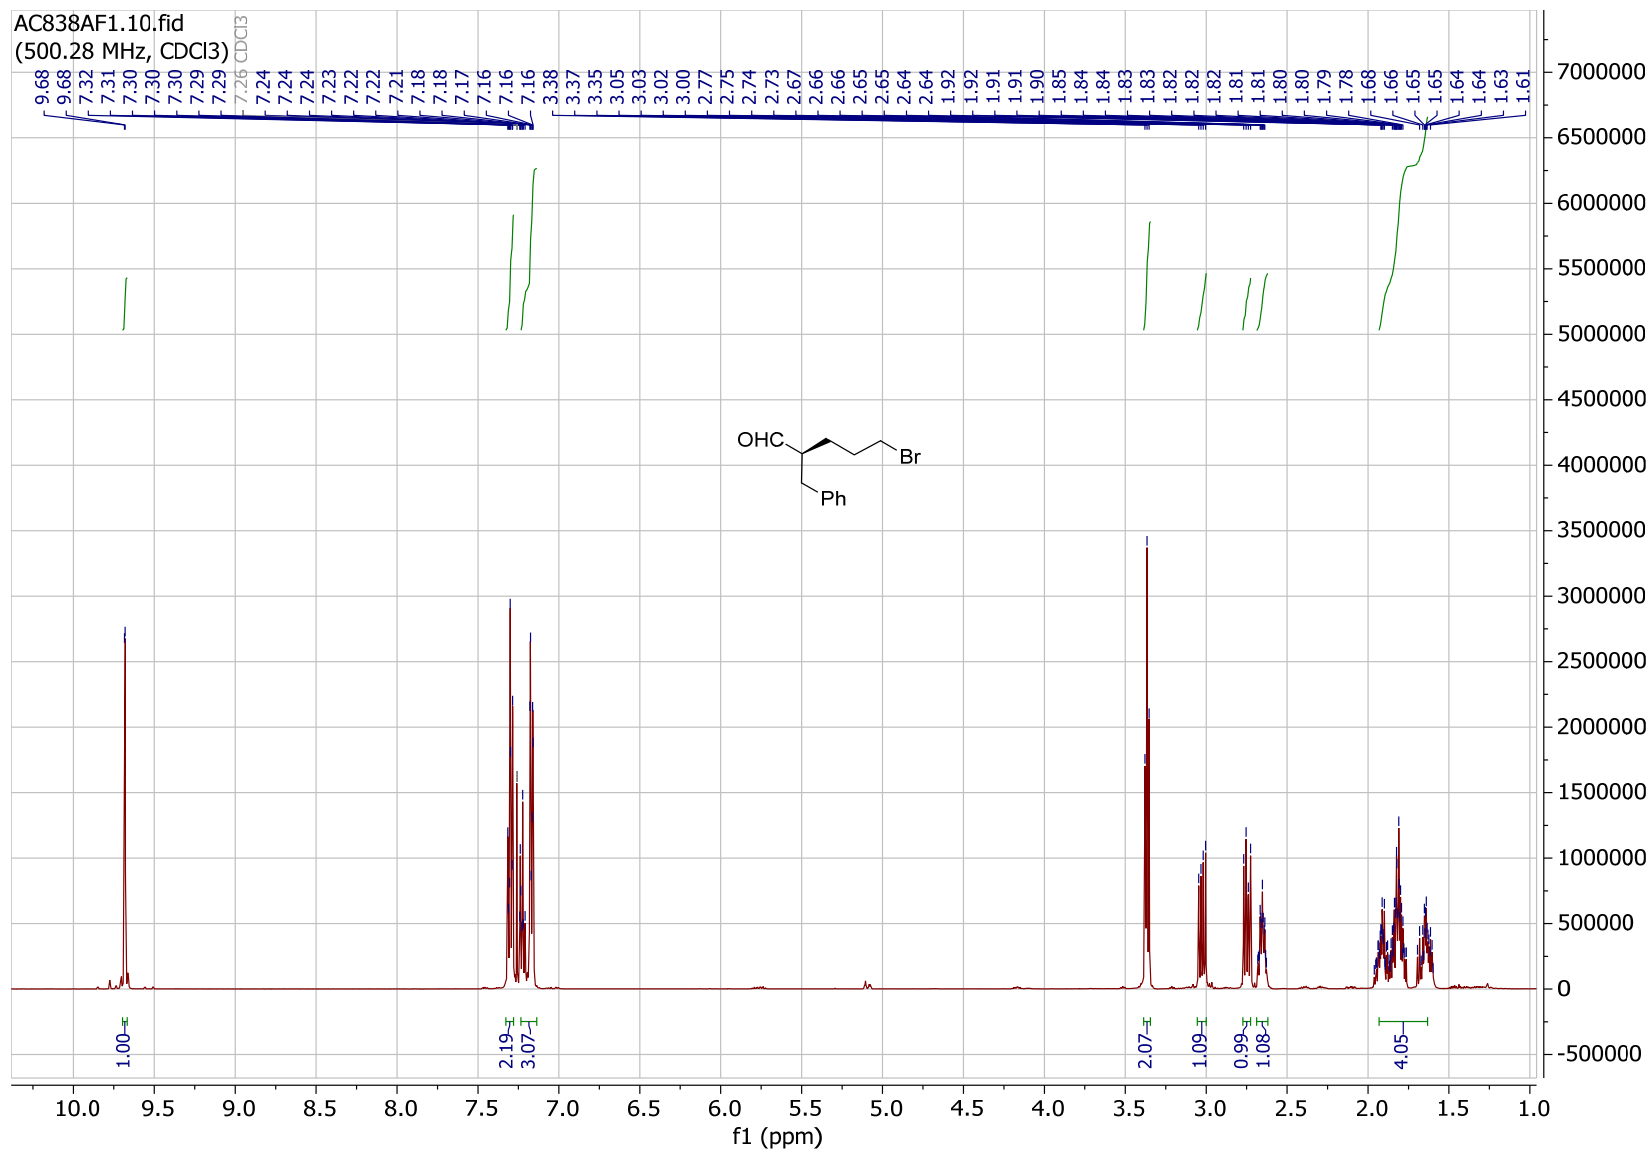

AC838AF1.11.fid  
(125.81 MHz, CDCl<sub>3</sub>)

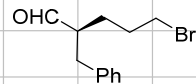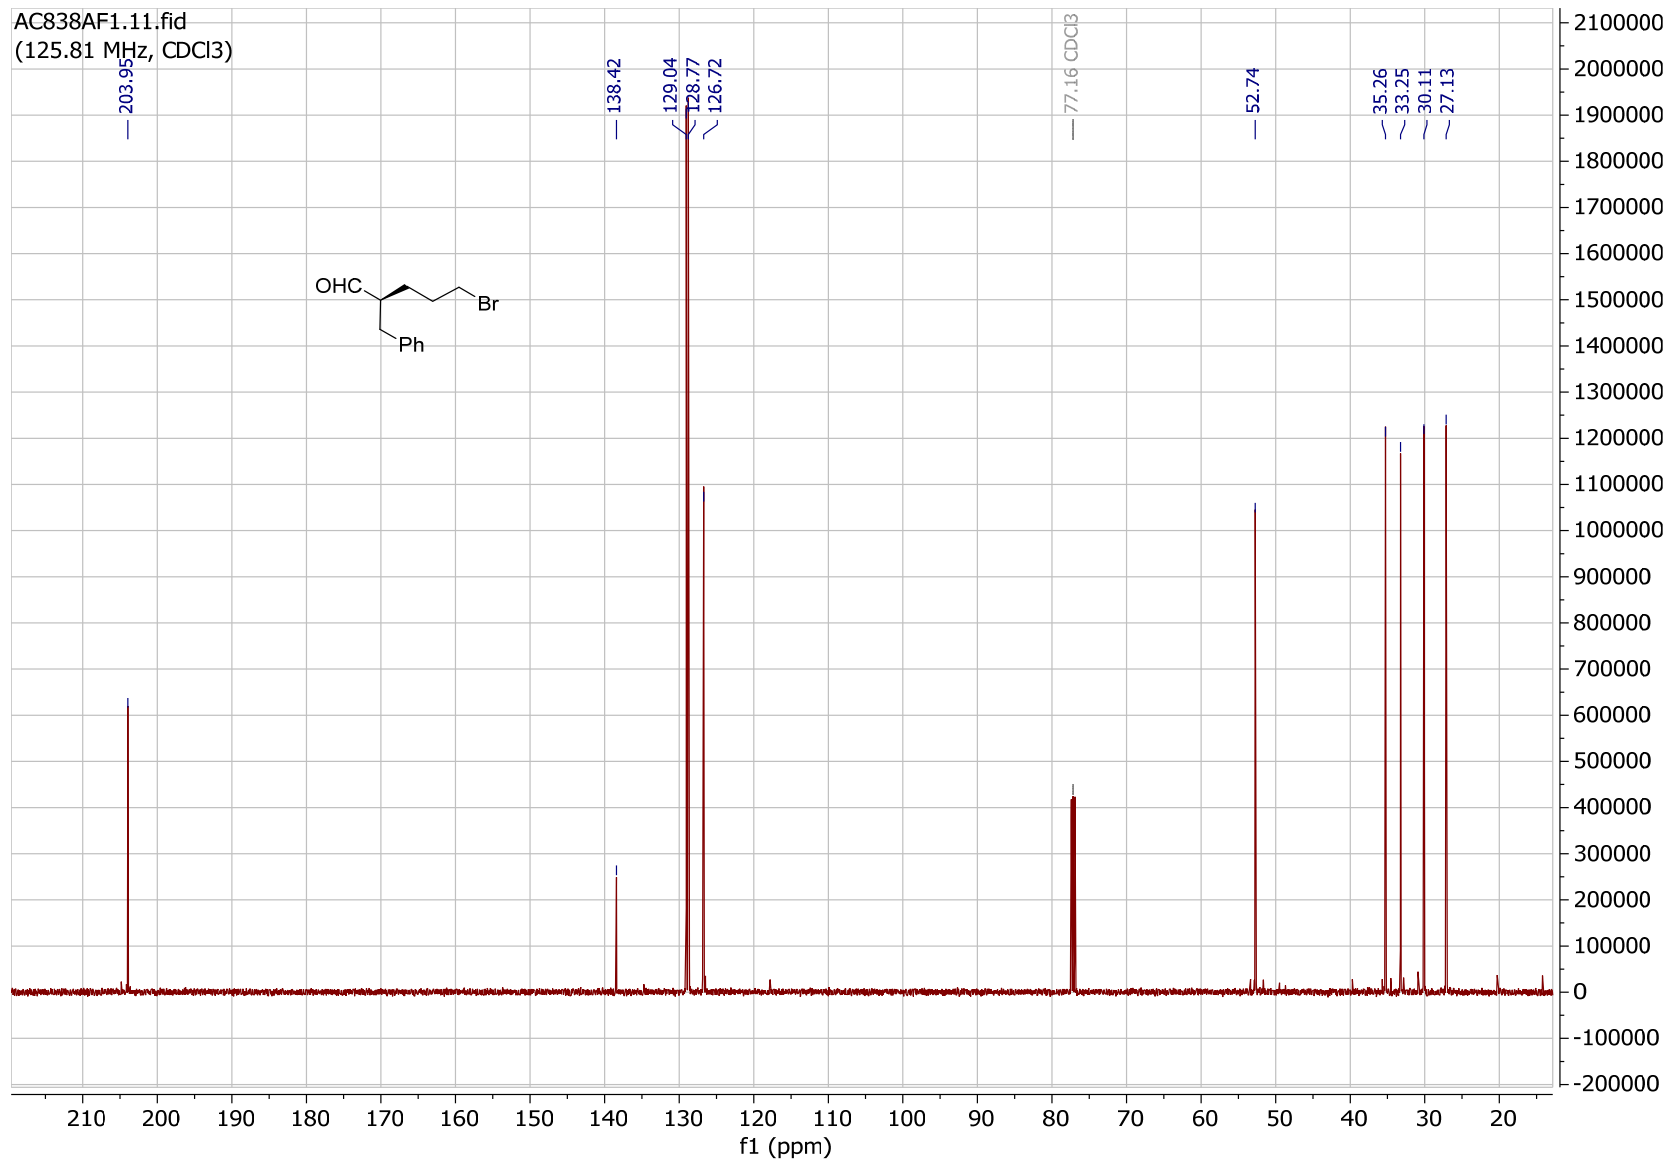

# 2-Benzyl-5-iodopentanal 2ba-I

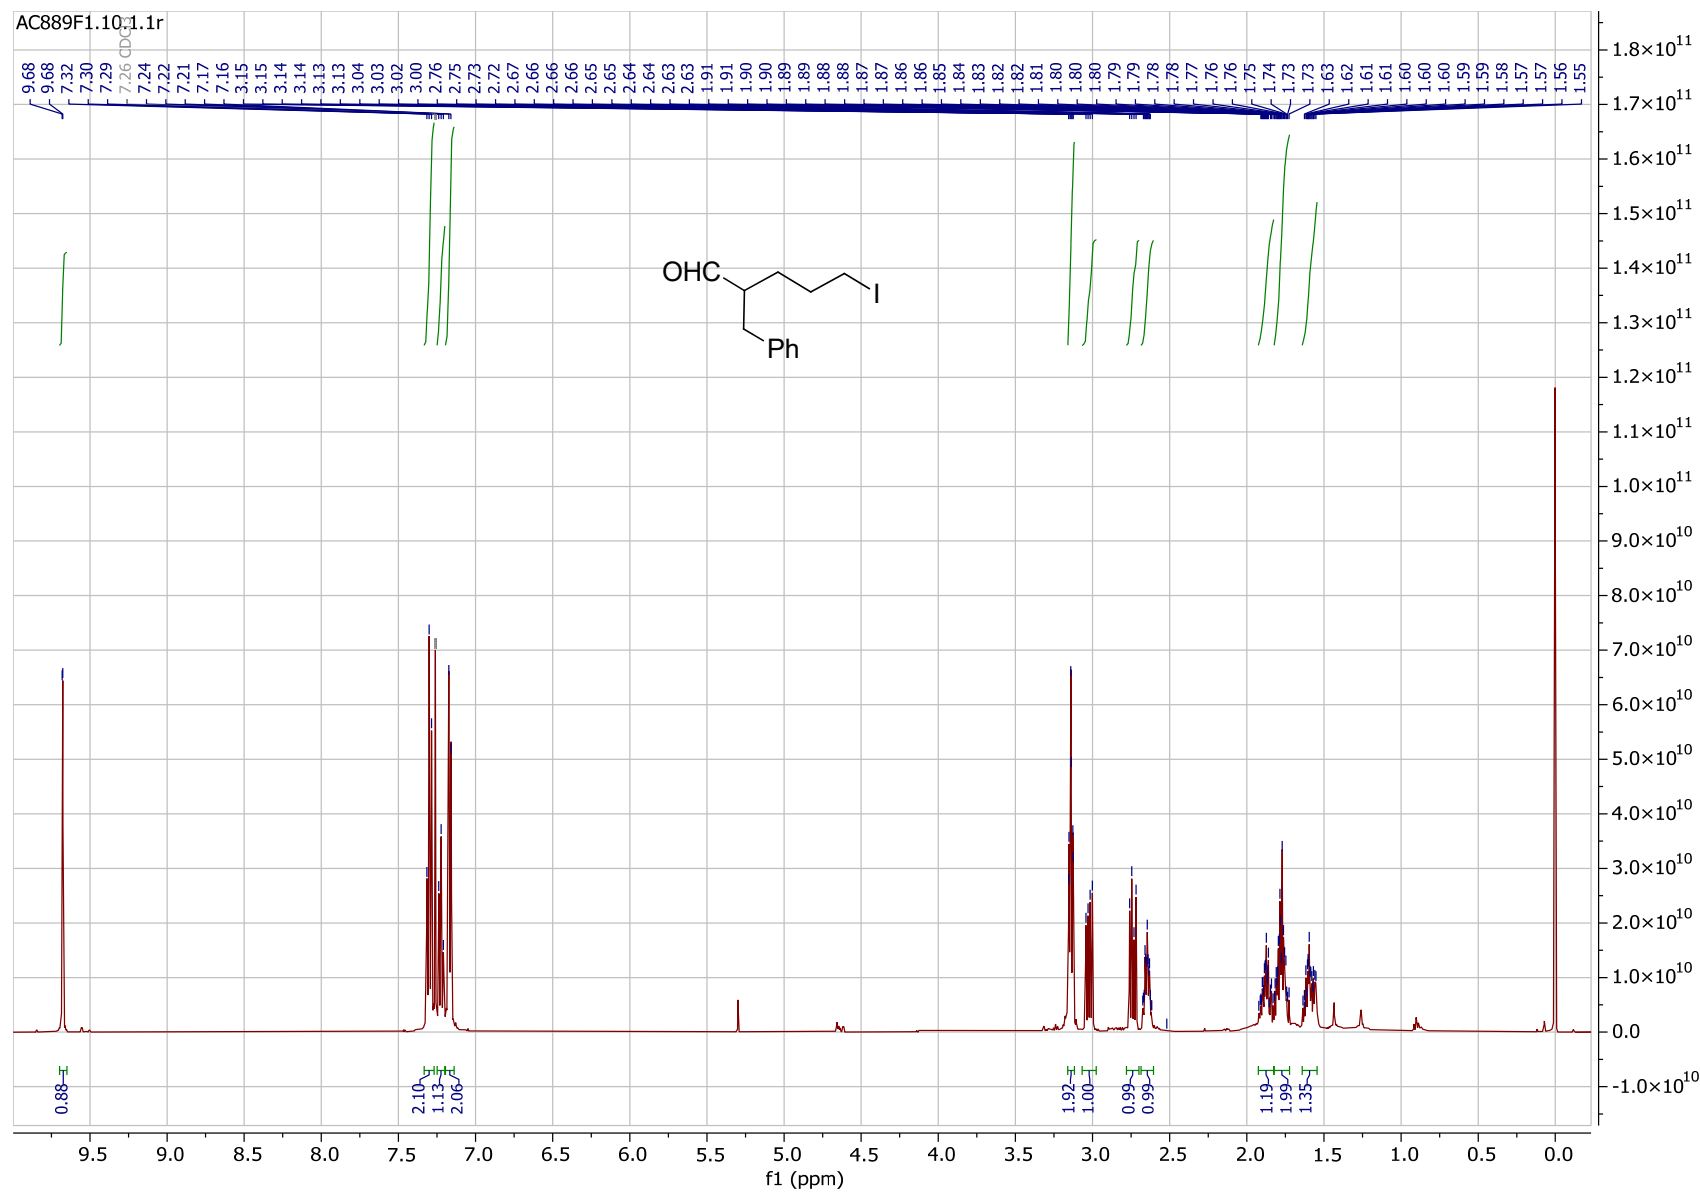

AC889F1.11.1.1r

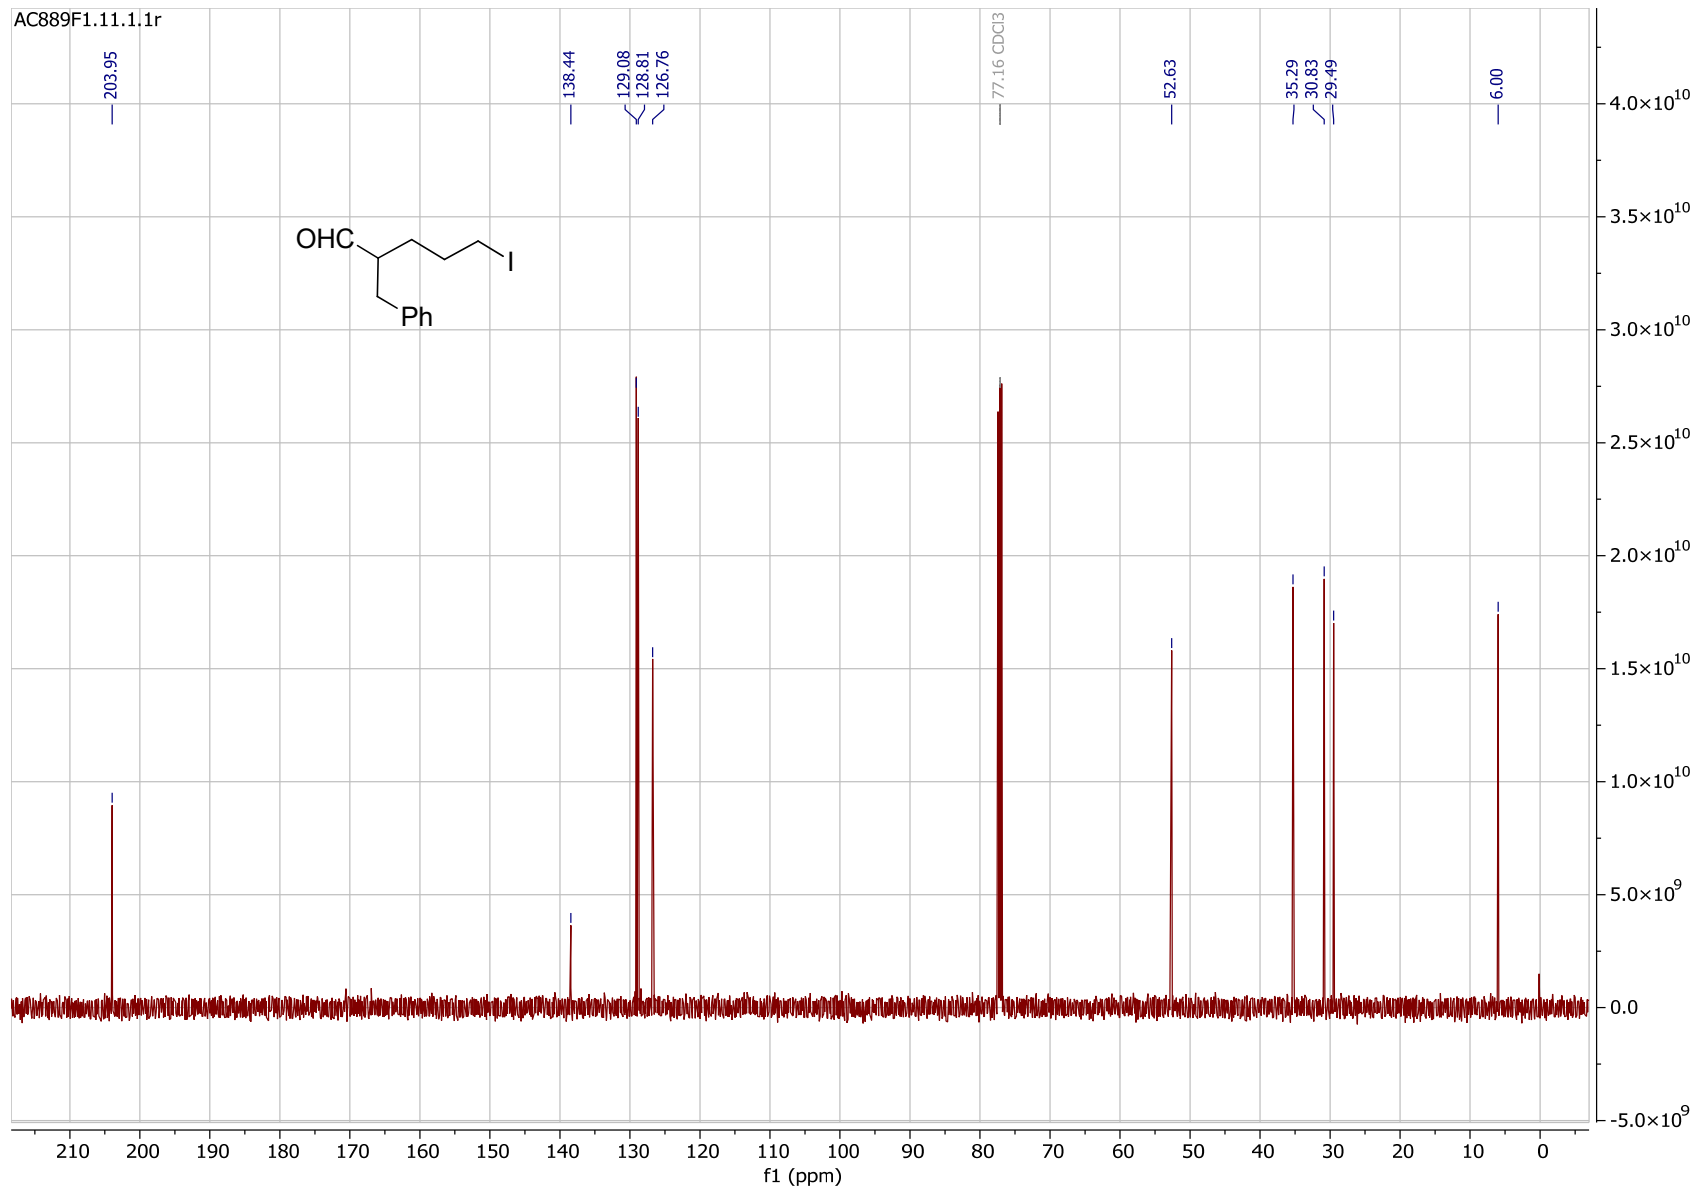



# 5-(Benzyloxy)-2-(3-bromopropyl)pentanal 2bb

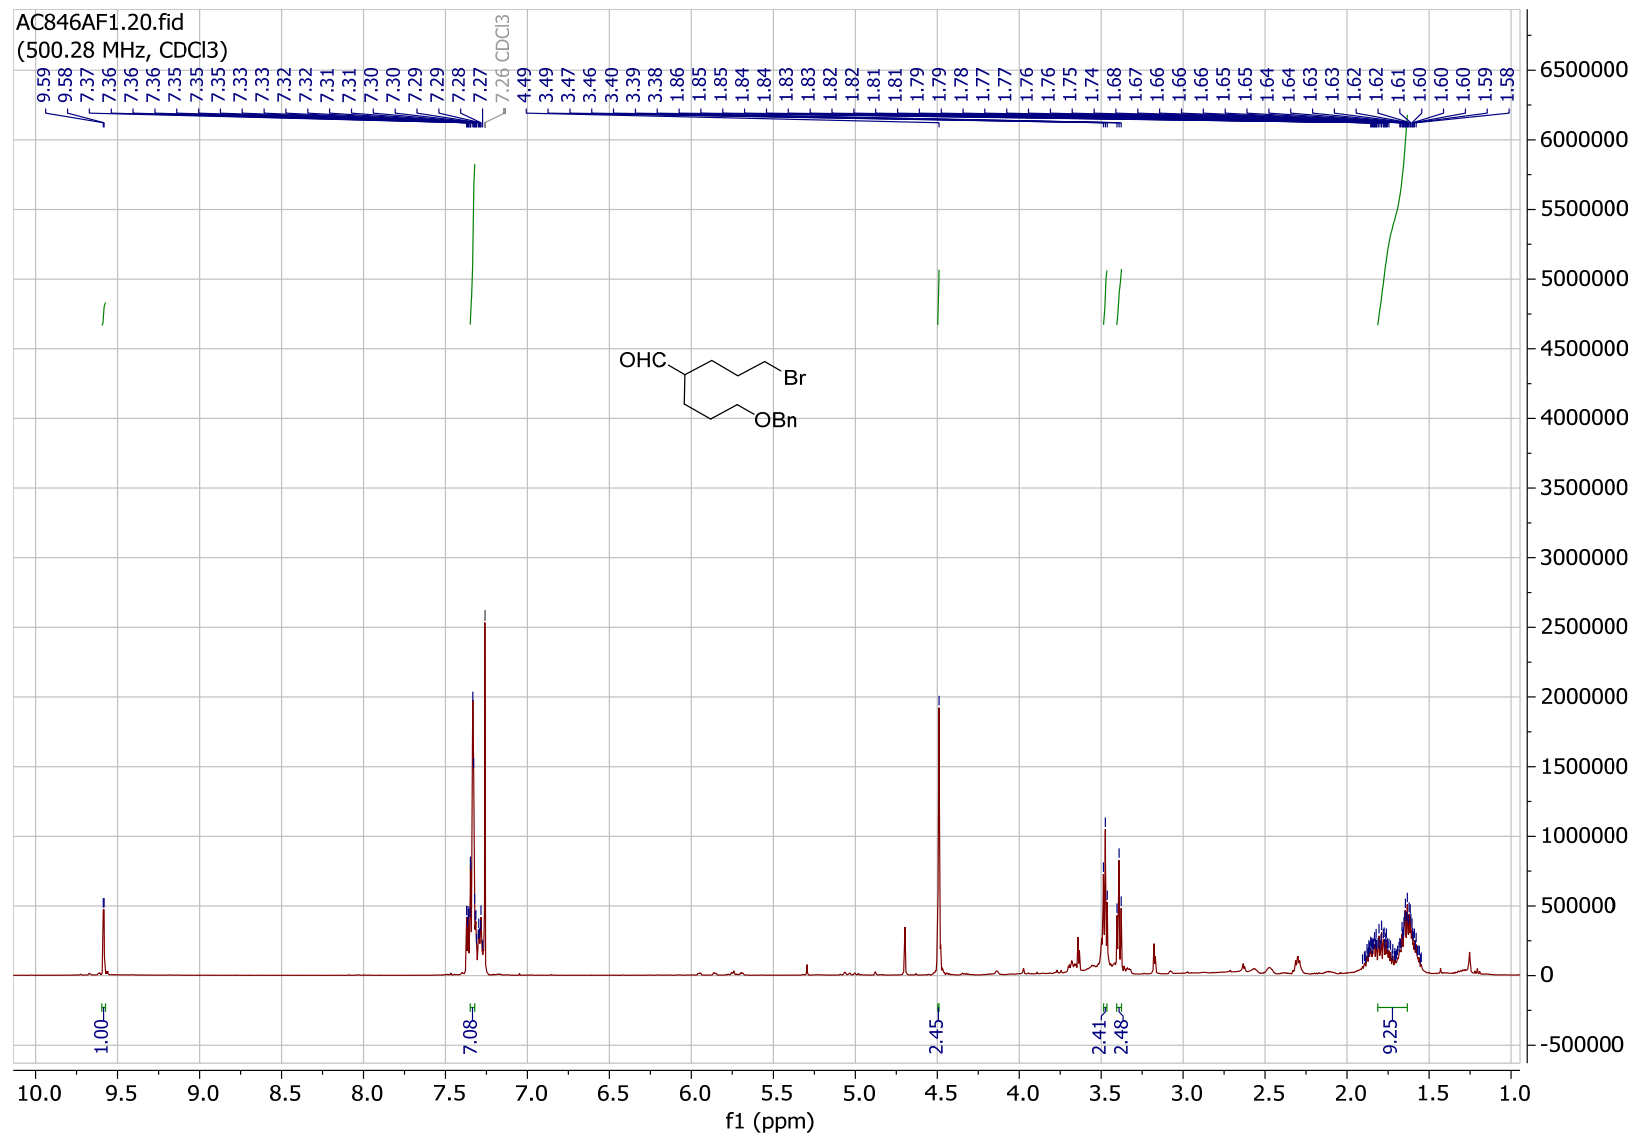

AC846AF1.21.fid  
(125.81 MHz, CDCl<sub>3</sub>)

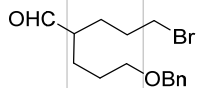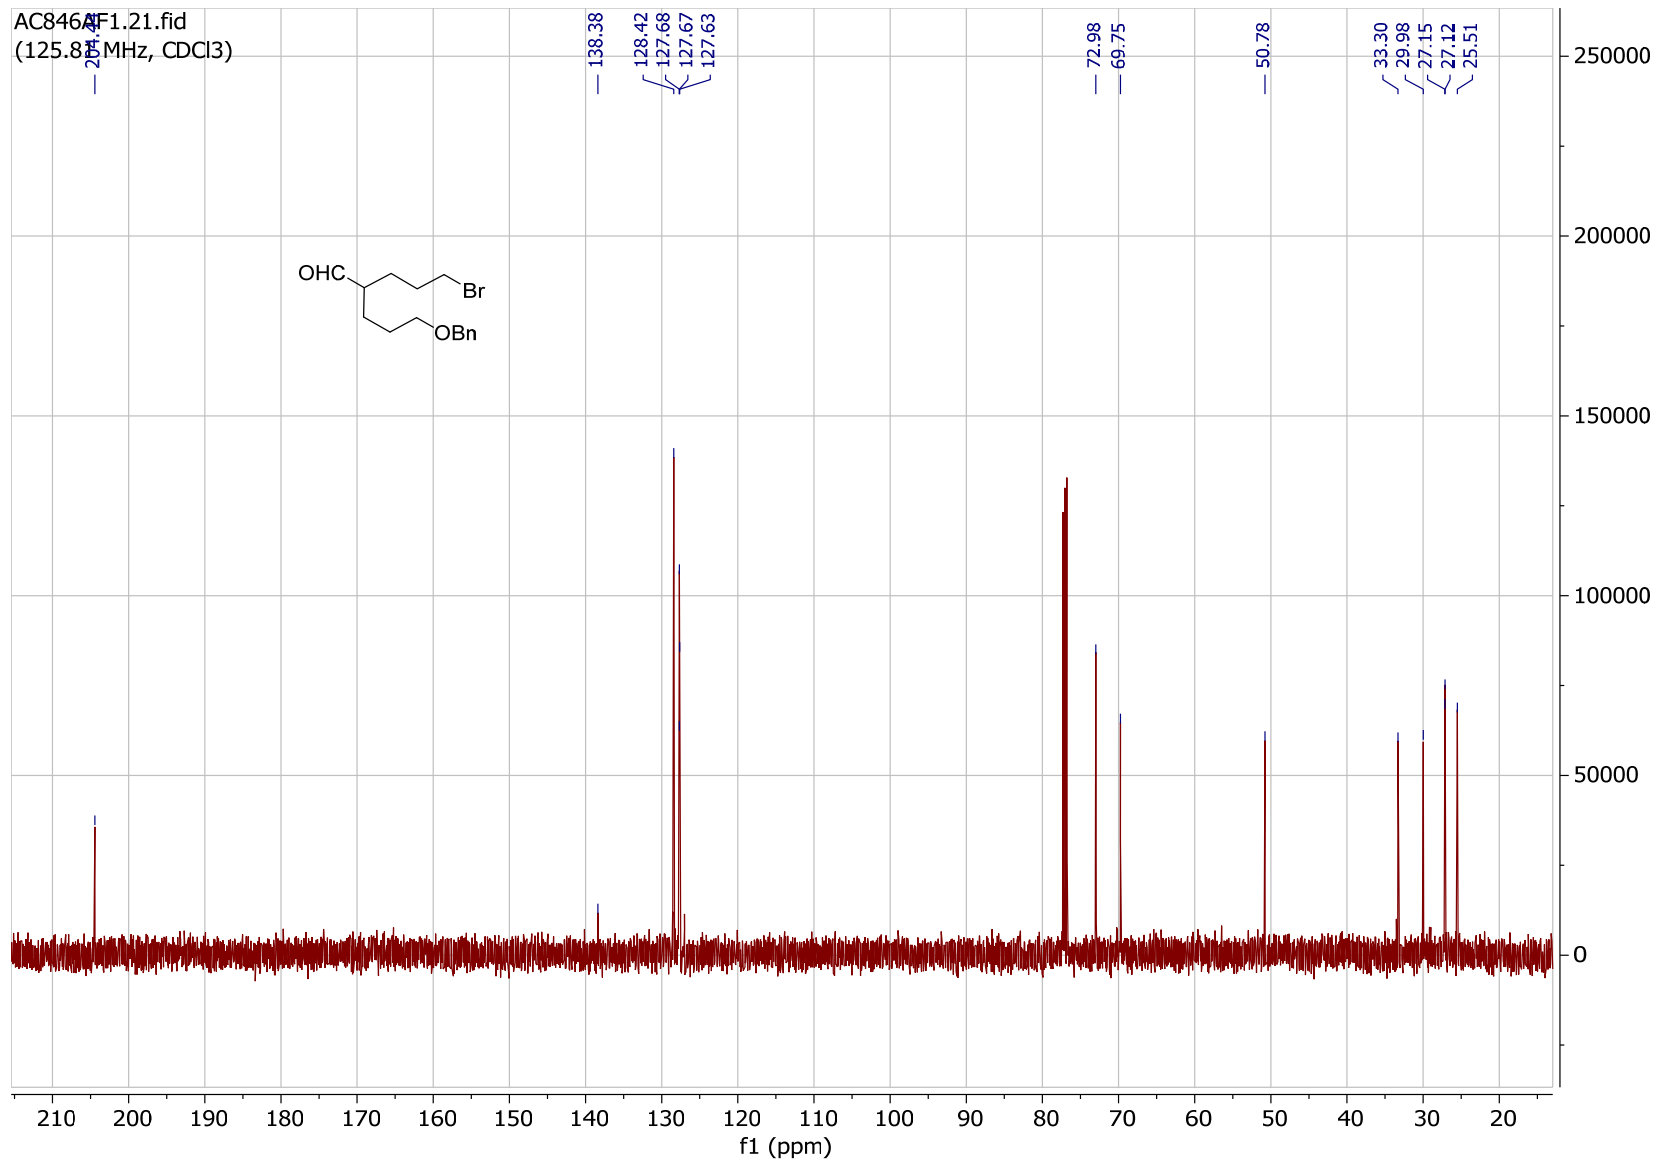

# 2-(3-Bromopropyl)-5-methylhexanal 2bc

AC881AF1.10.fid  
(500.28 MHz, CDCl<sub>3</sub>)

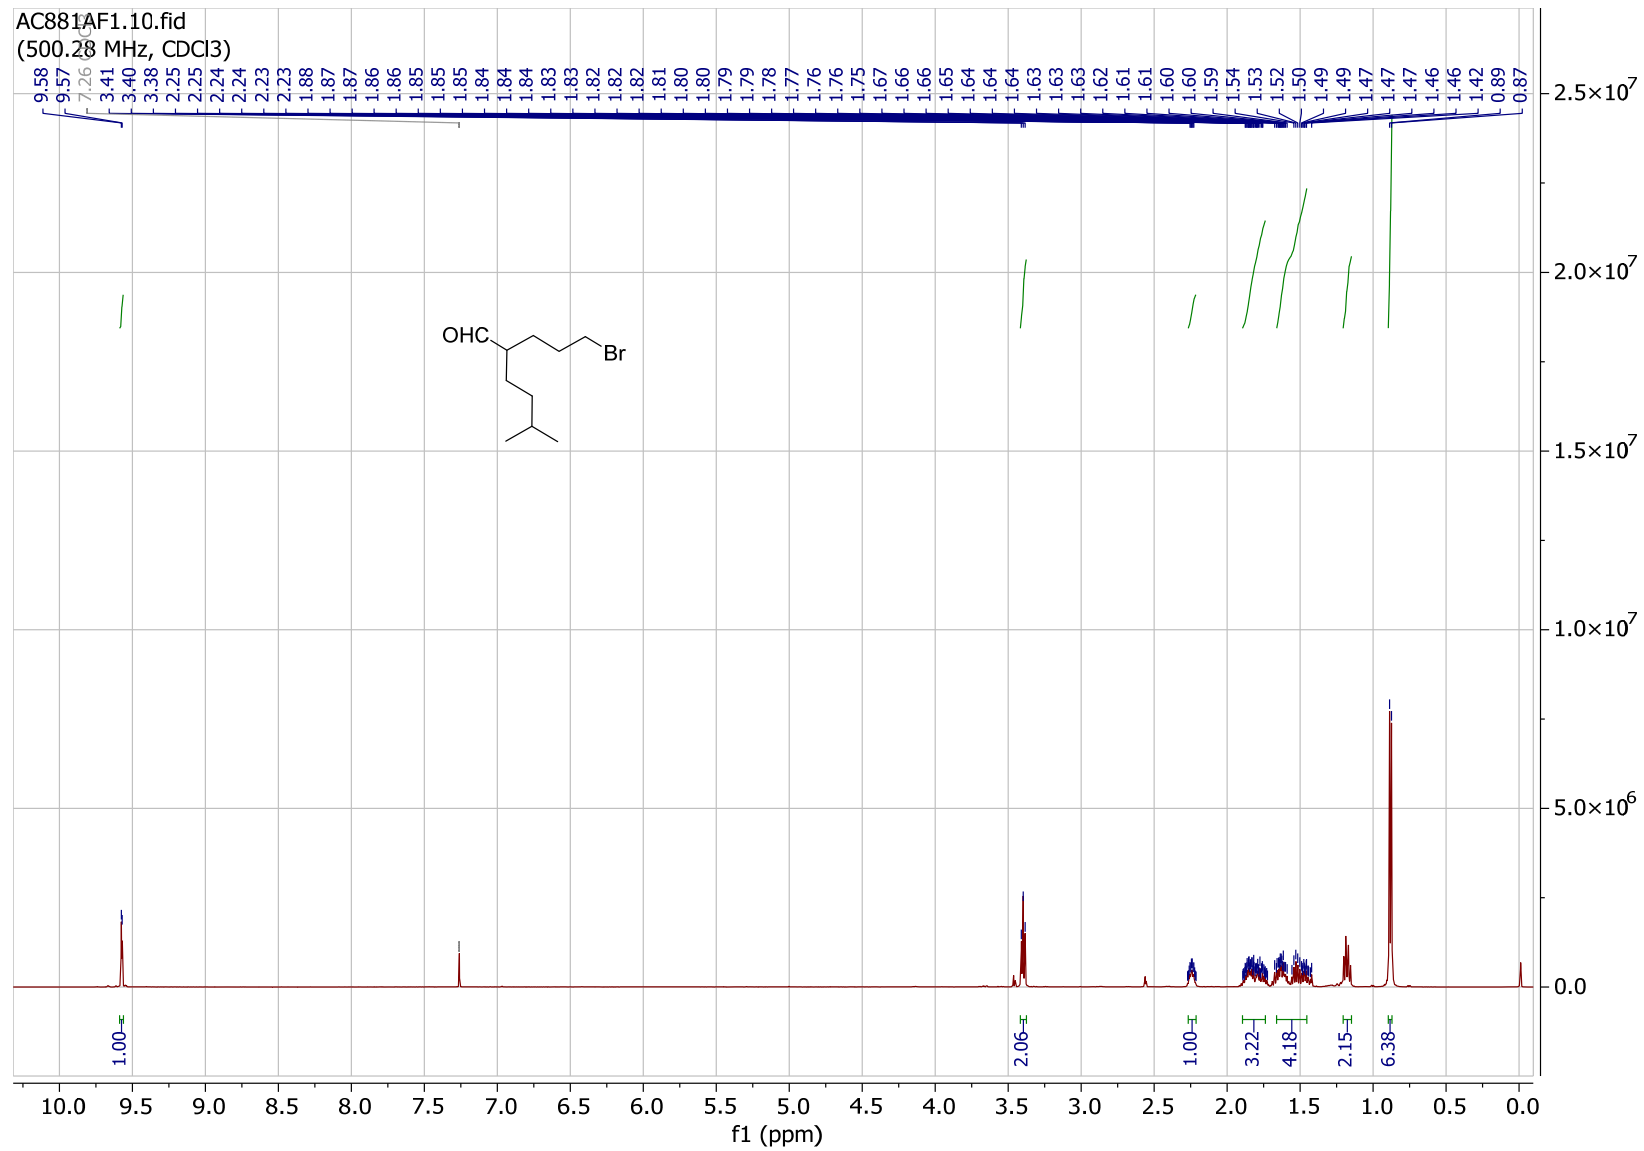

AC881AF1.11.fid  
(125.81 MHz, CDCl<sub>3</sub>)

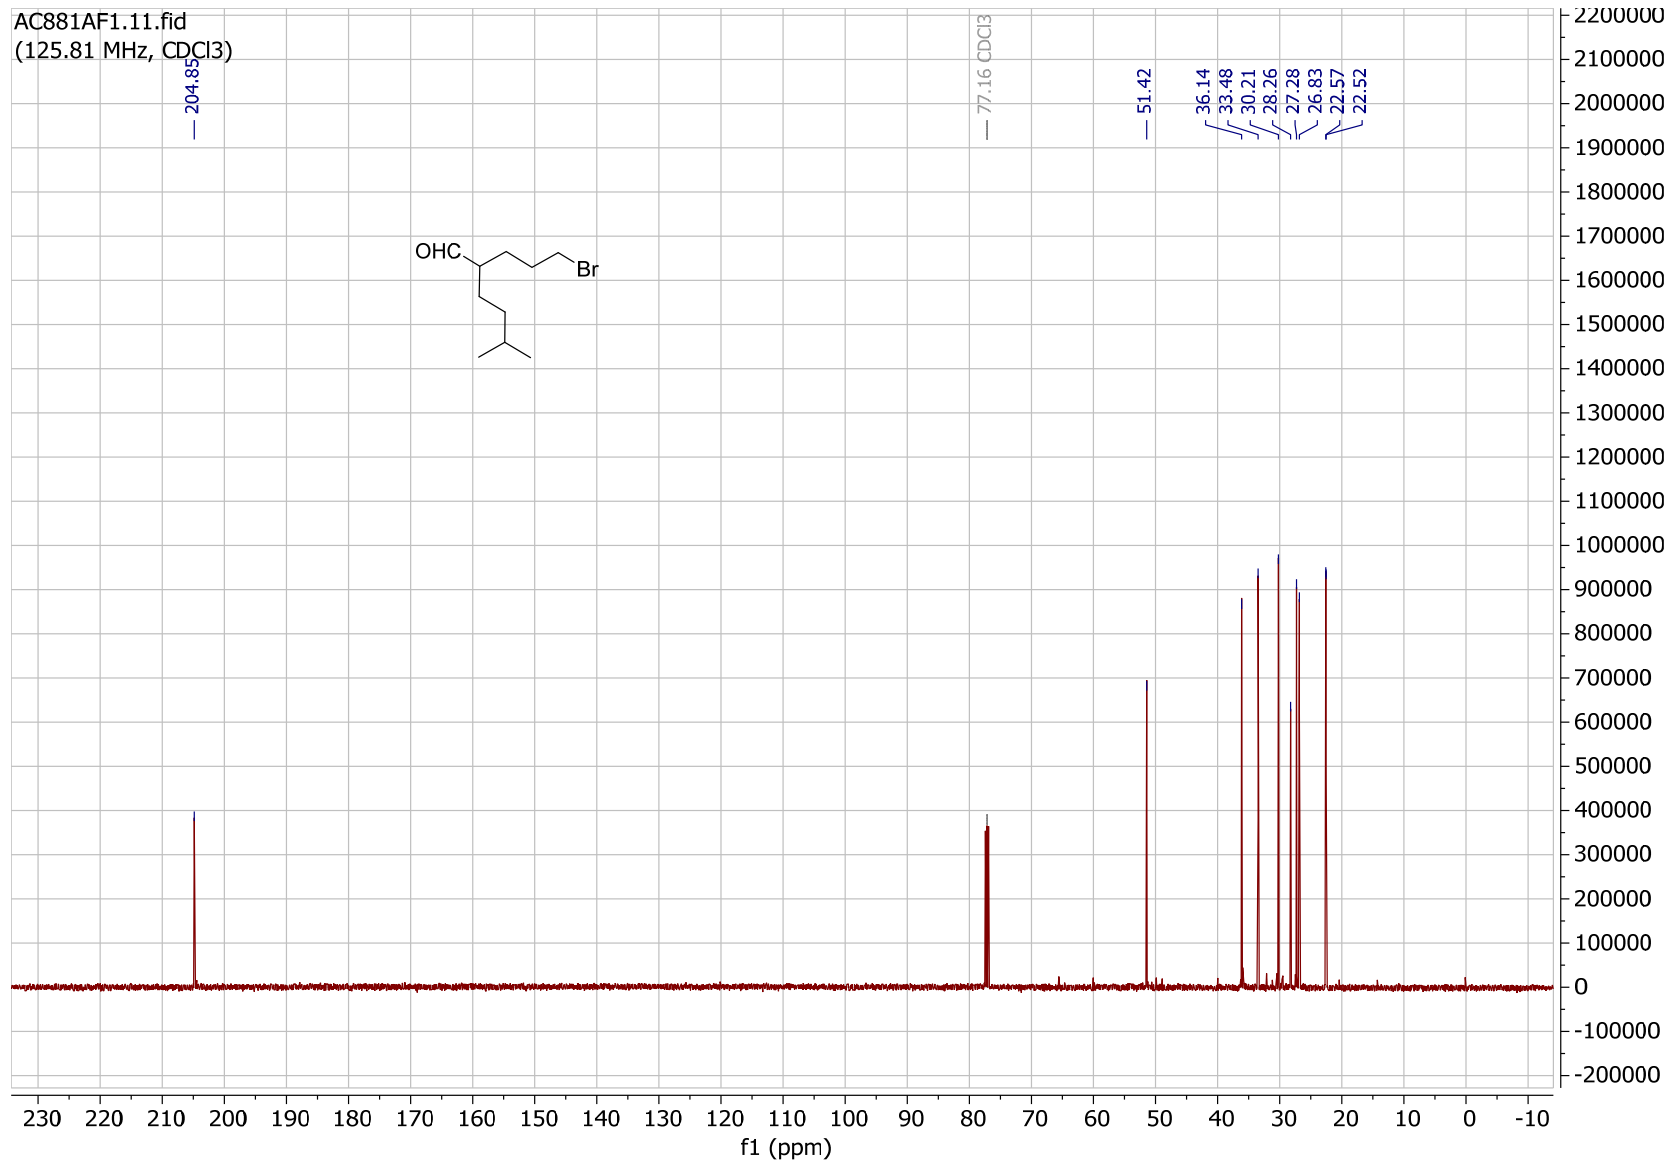

# 5-Bromo-2-phenylpentanal 2bd

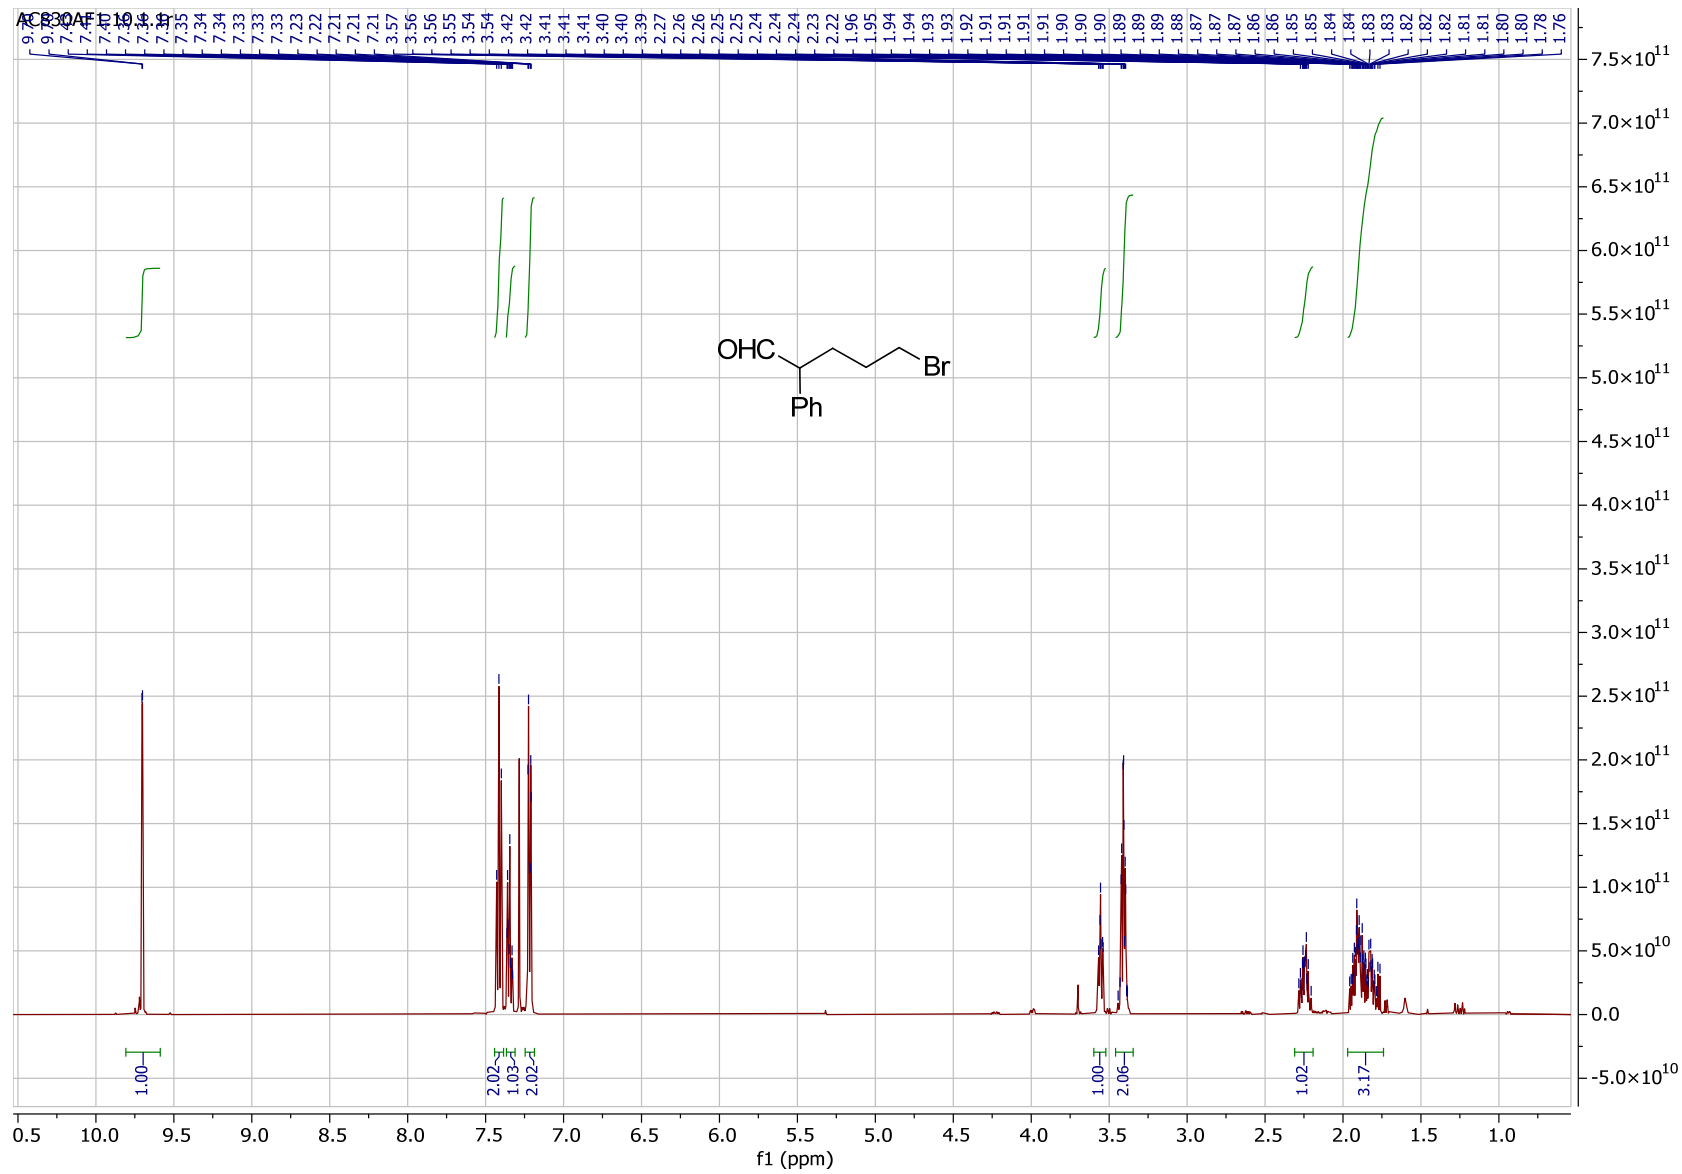

AC969P.11.1.1r

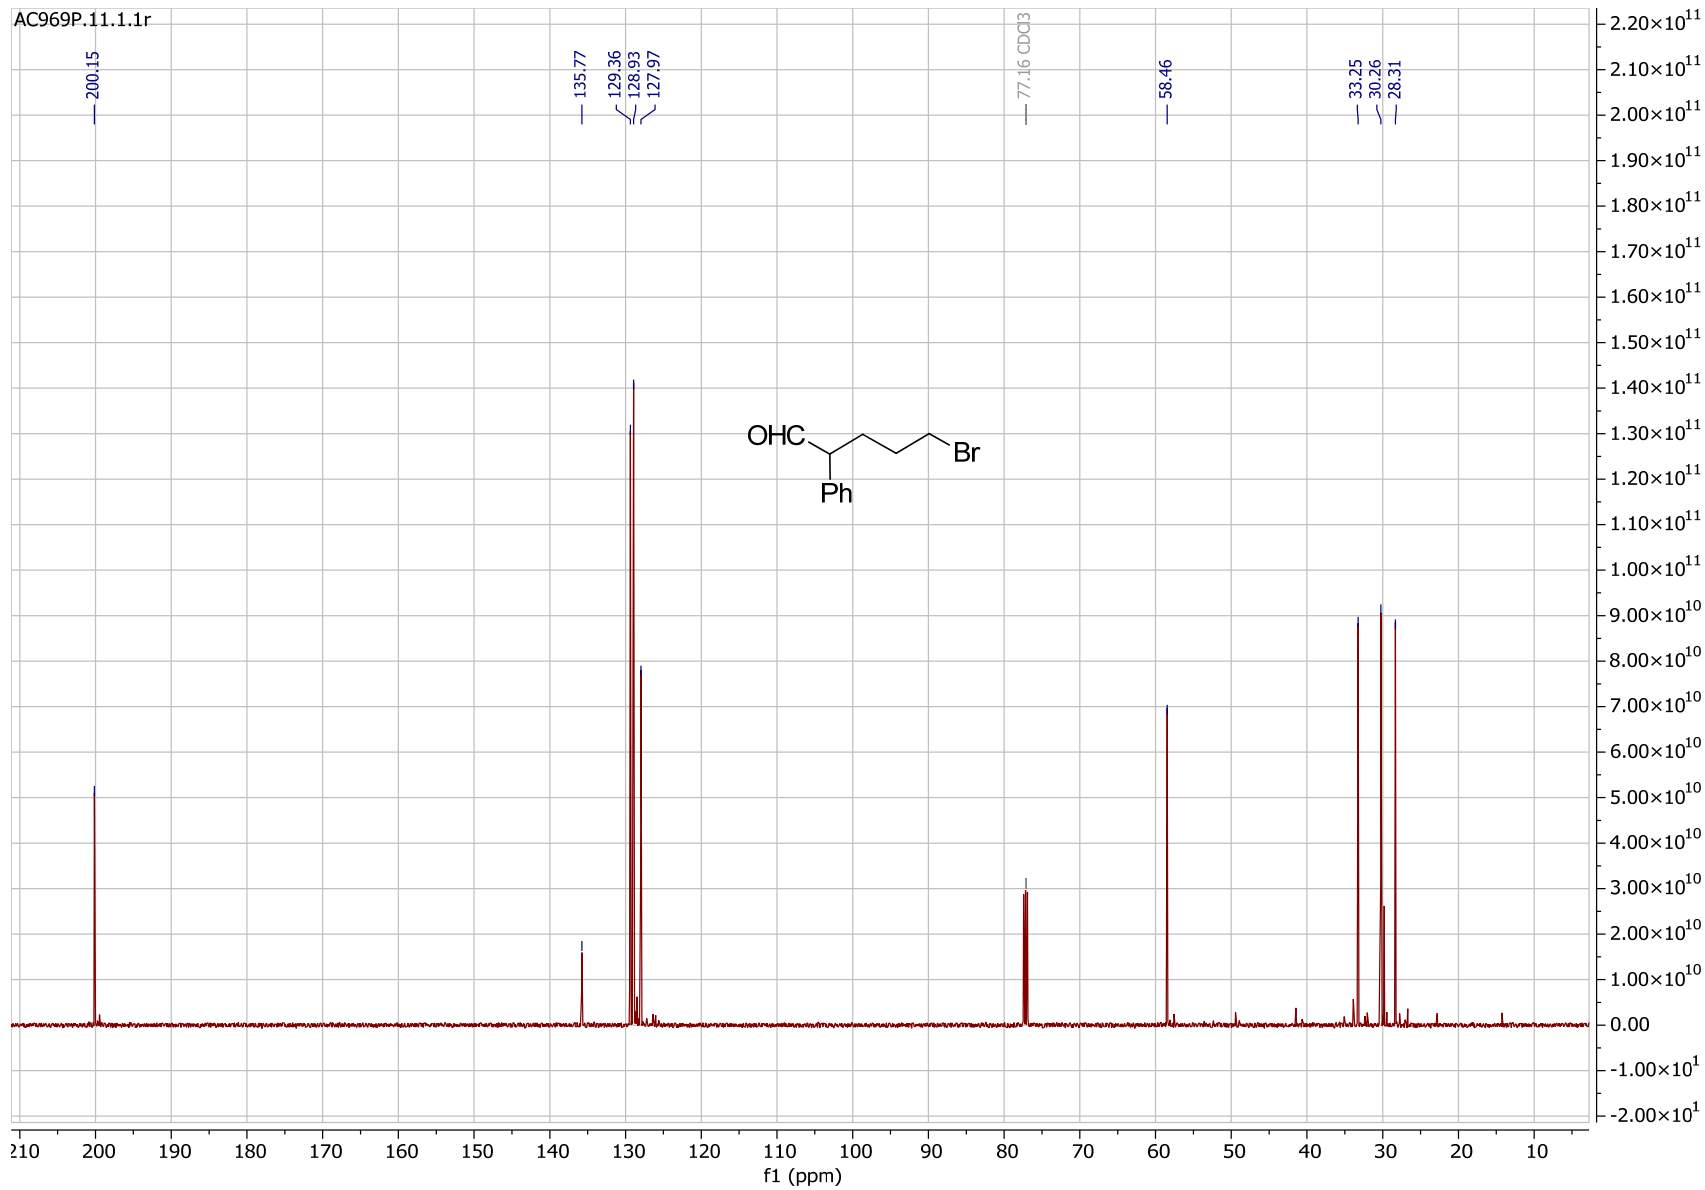

**(E)-2-(3-Bromopropyl)-5-phenylpent-4-enal 2bi**

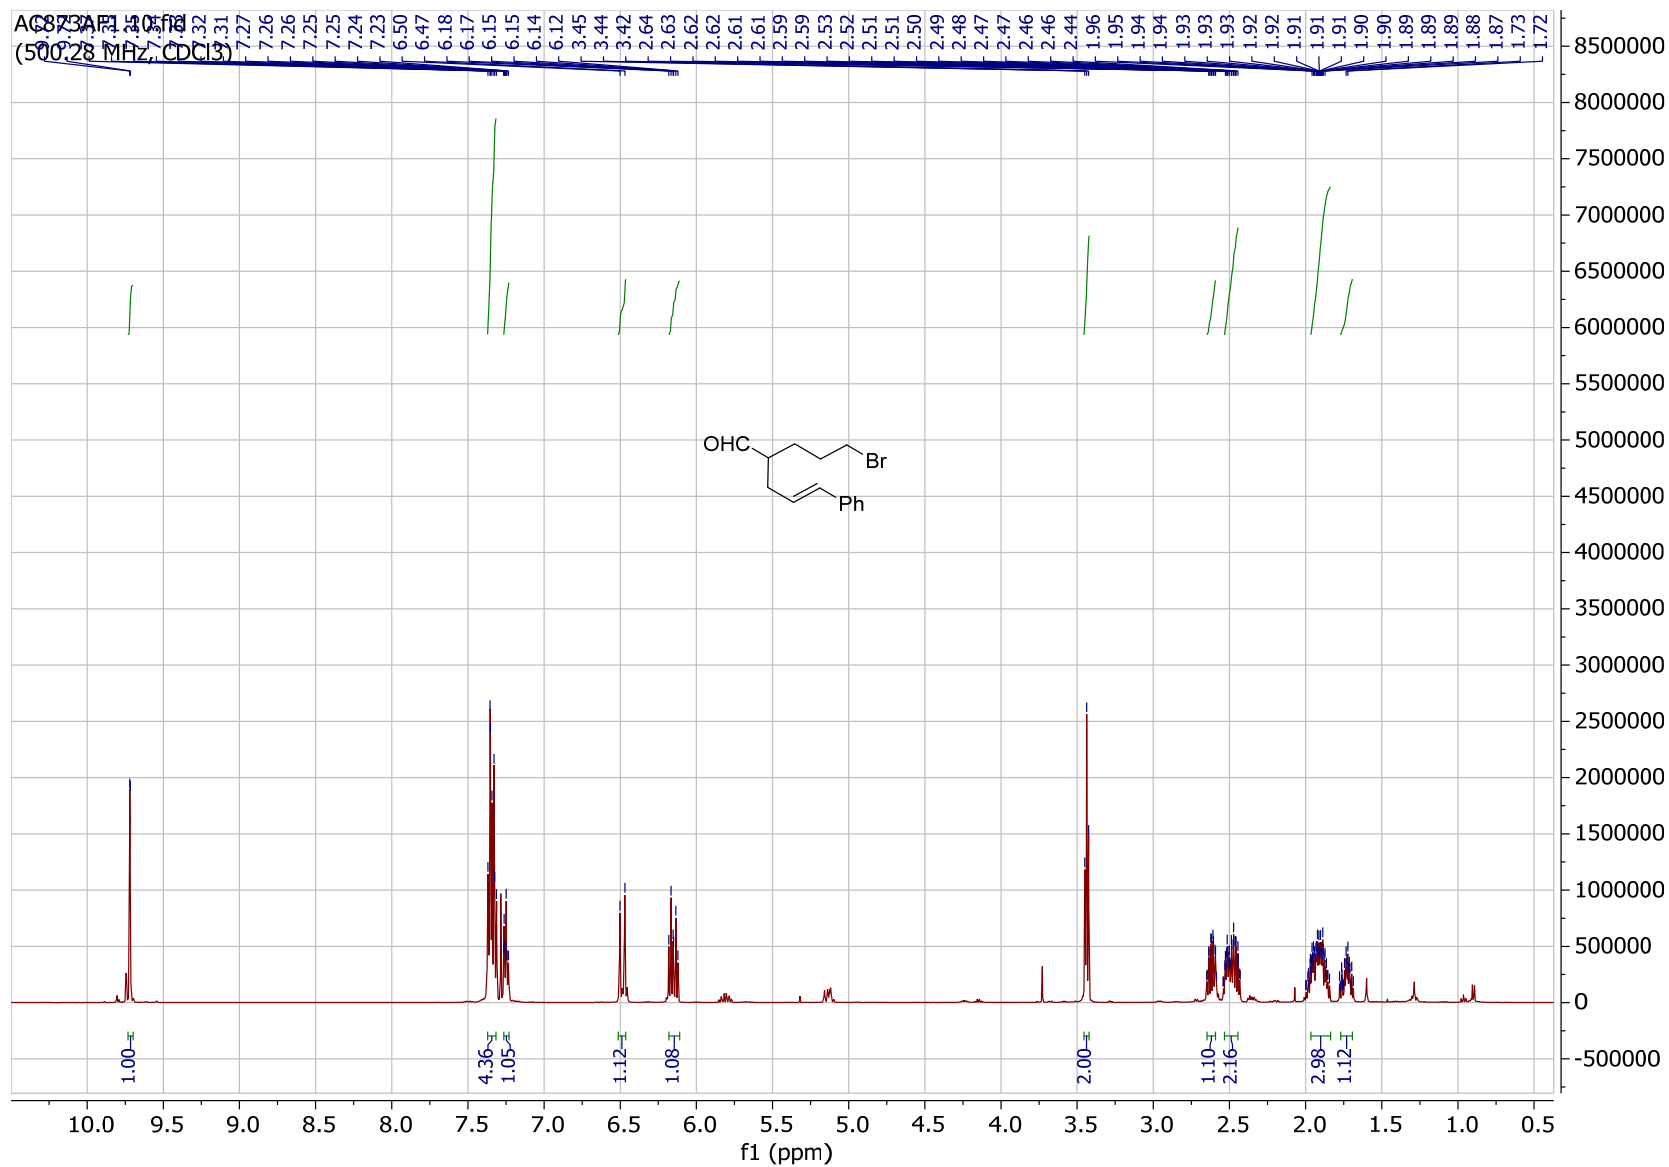

AC873AF1.11.fid  
(125.81 MHz, CDCl<sub>3</sub>)

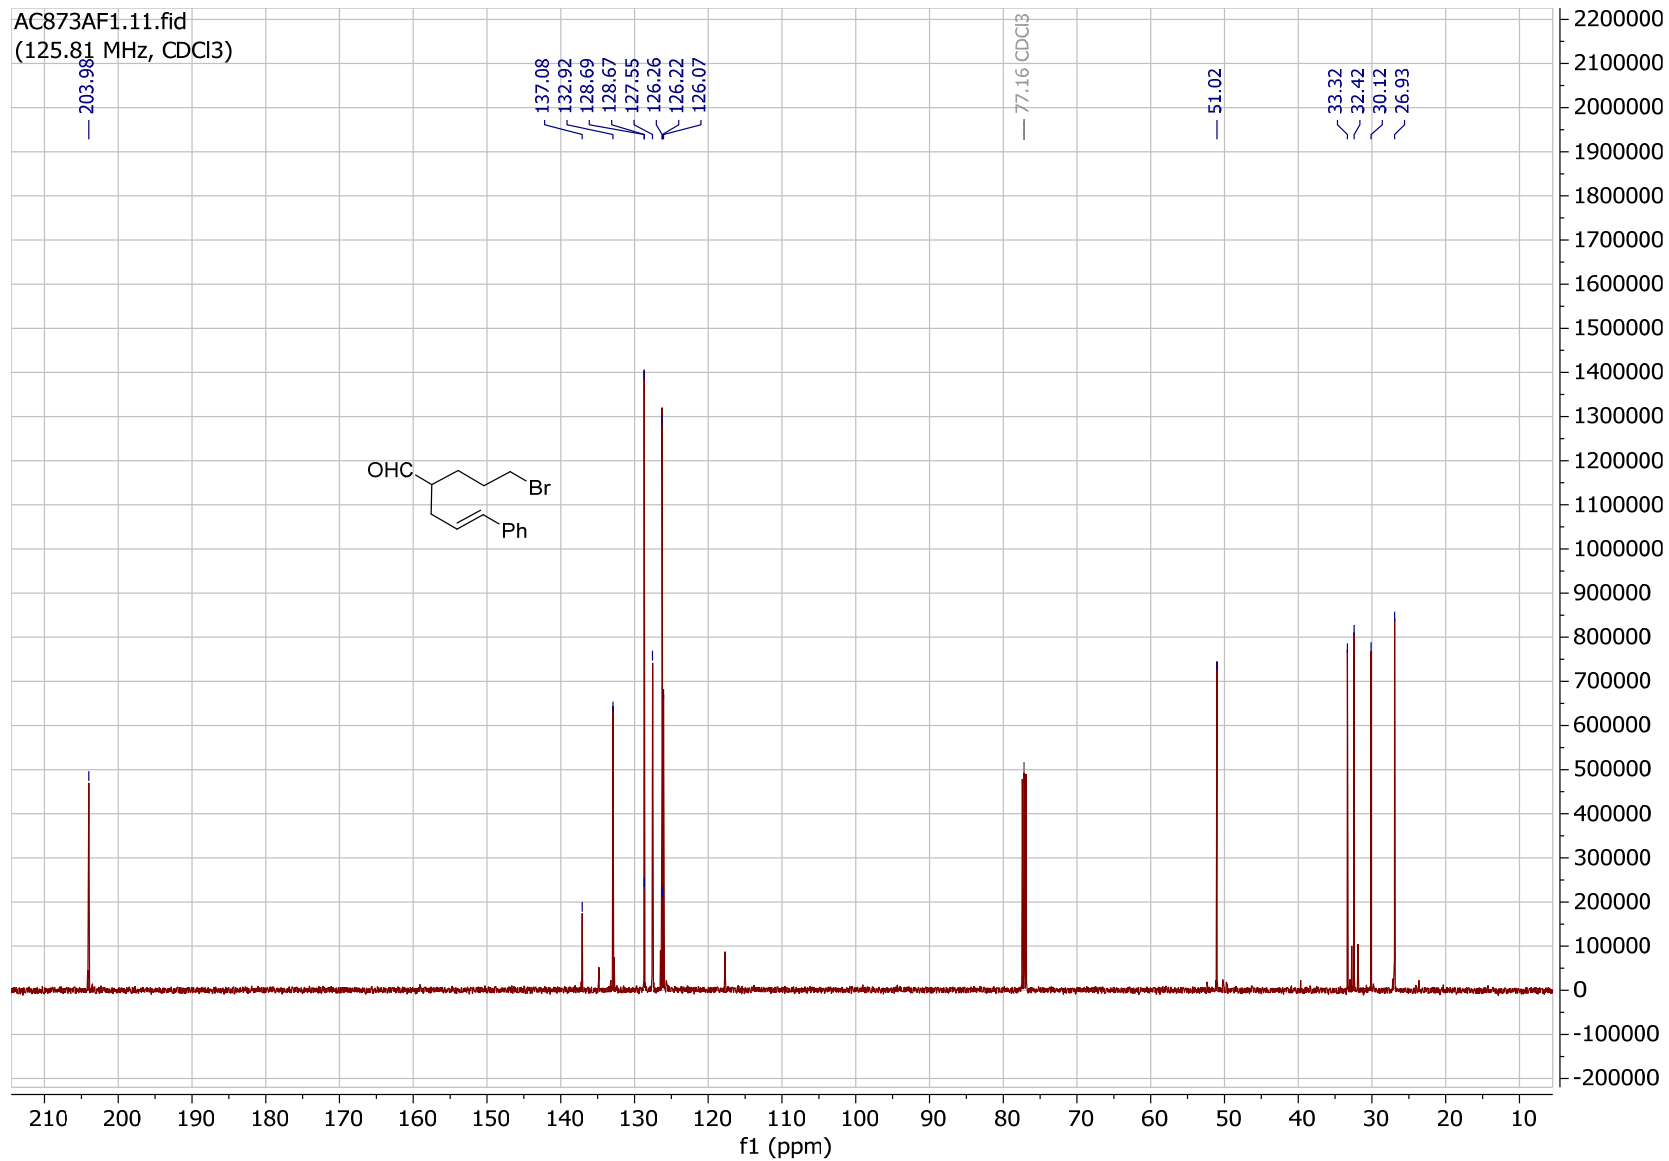



# Ethyl (E)-4-benzyl-7-bromohept-2-enoate 3ba

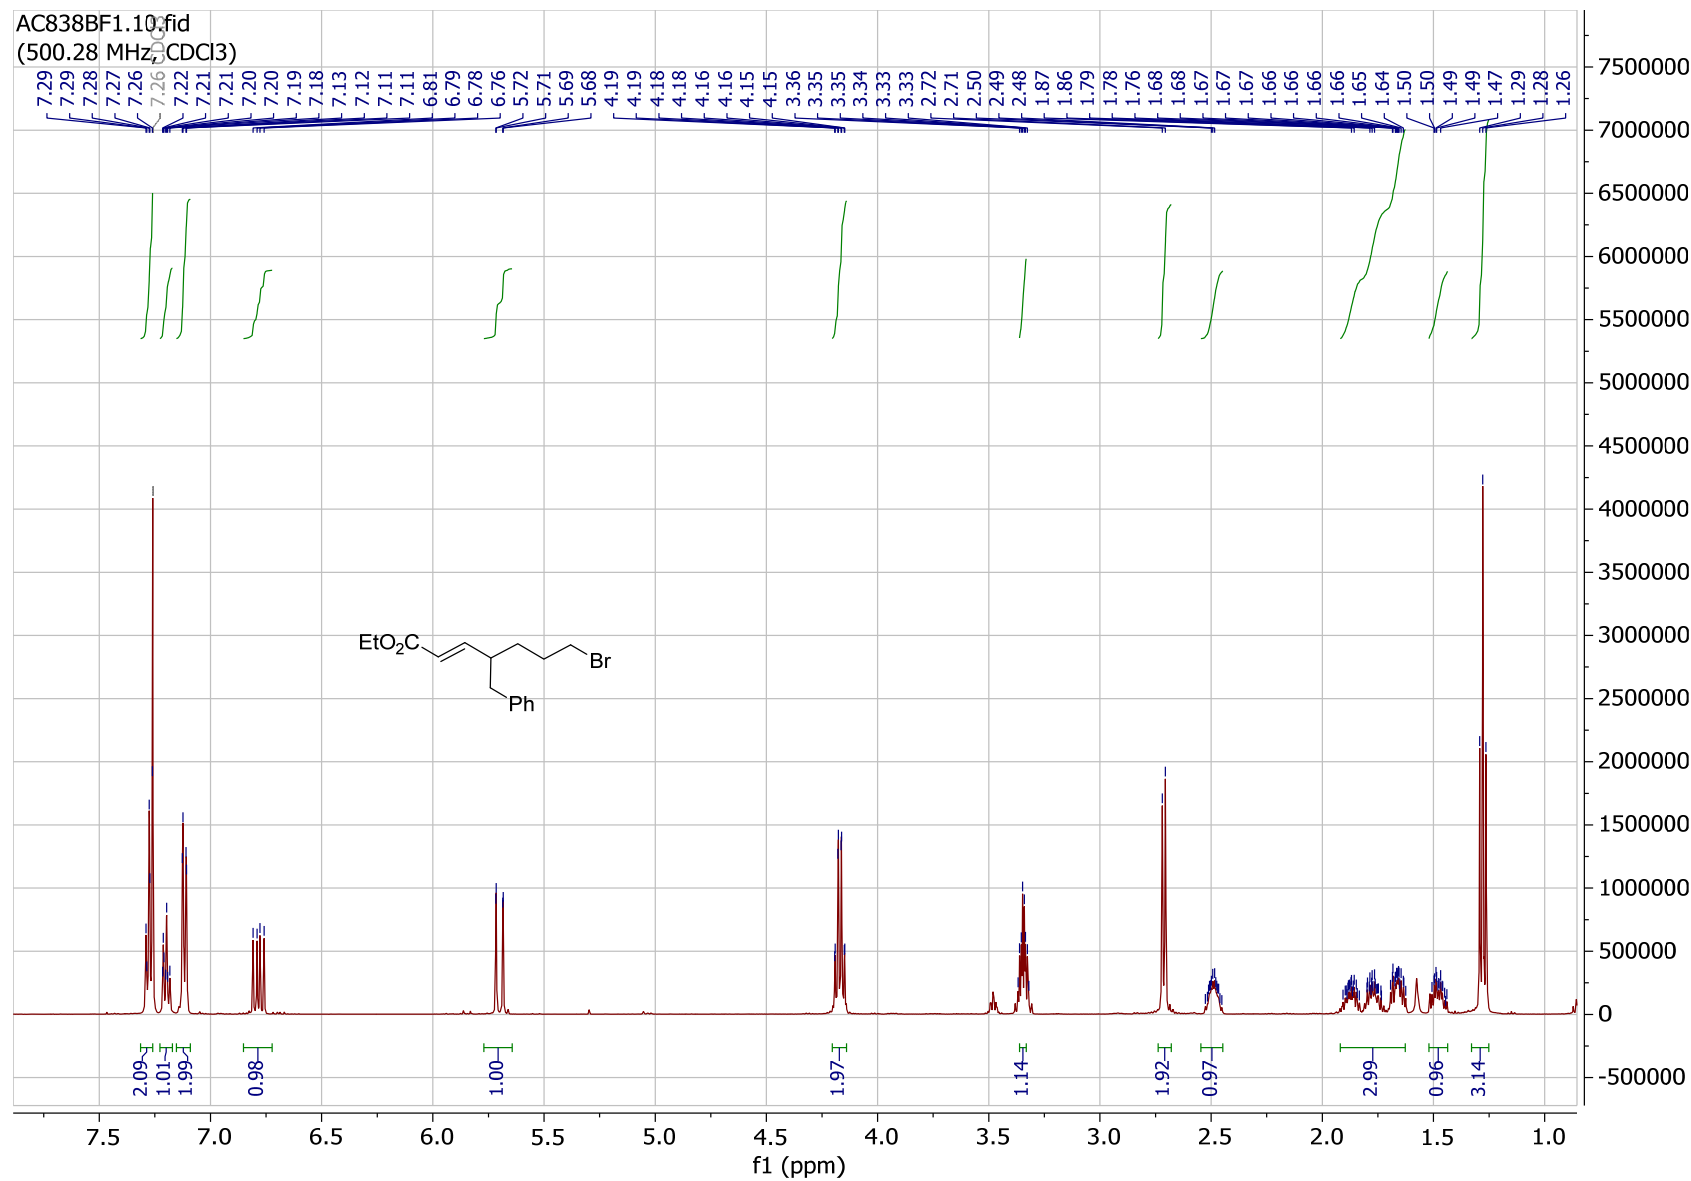

AC838BF1.11.fid  
(125.81 MHz, CDCl<sub>3</sub>)

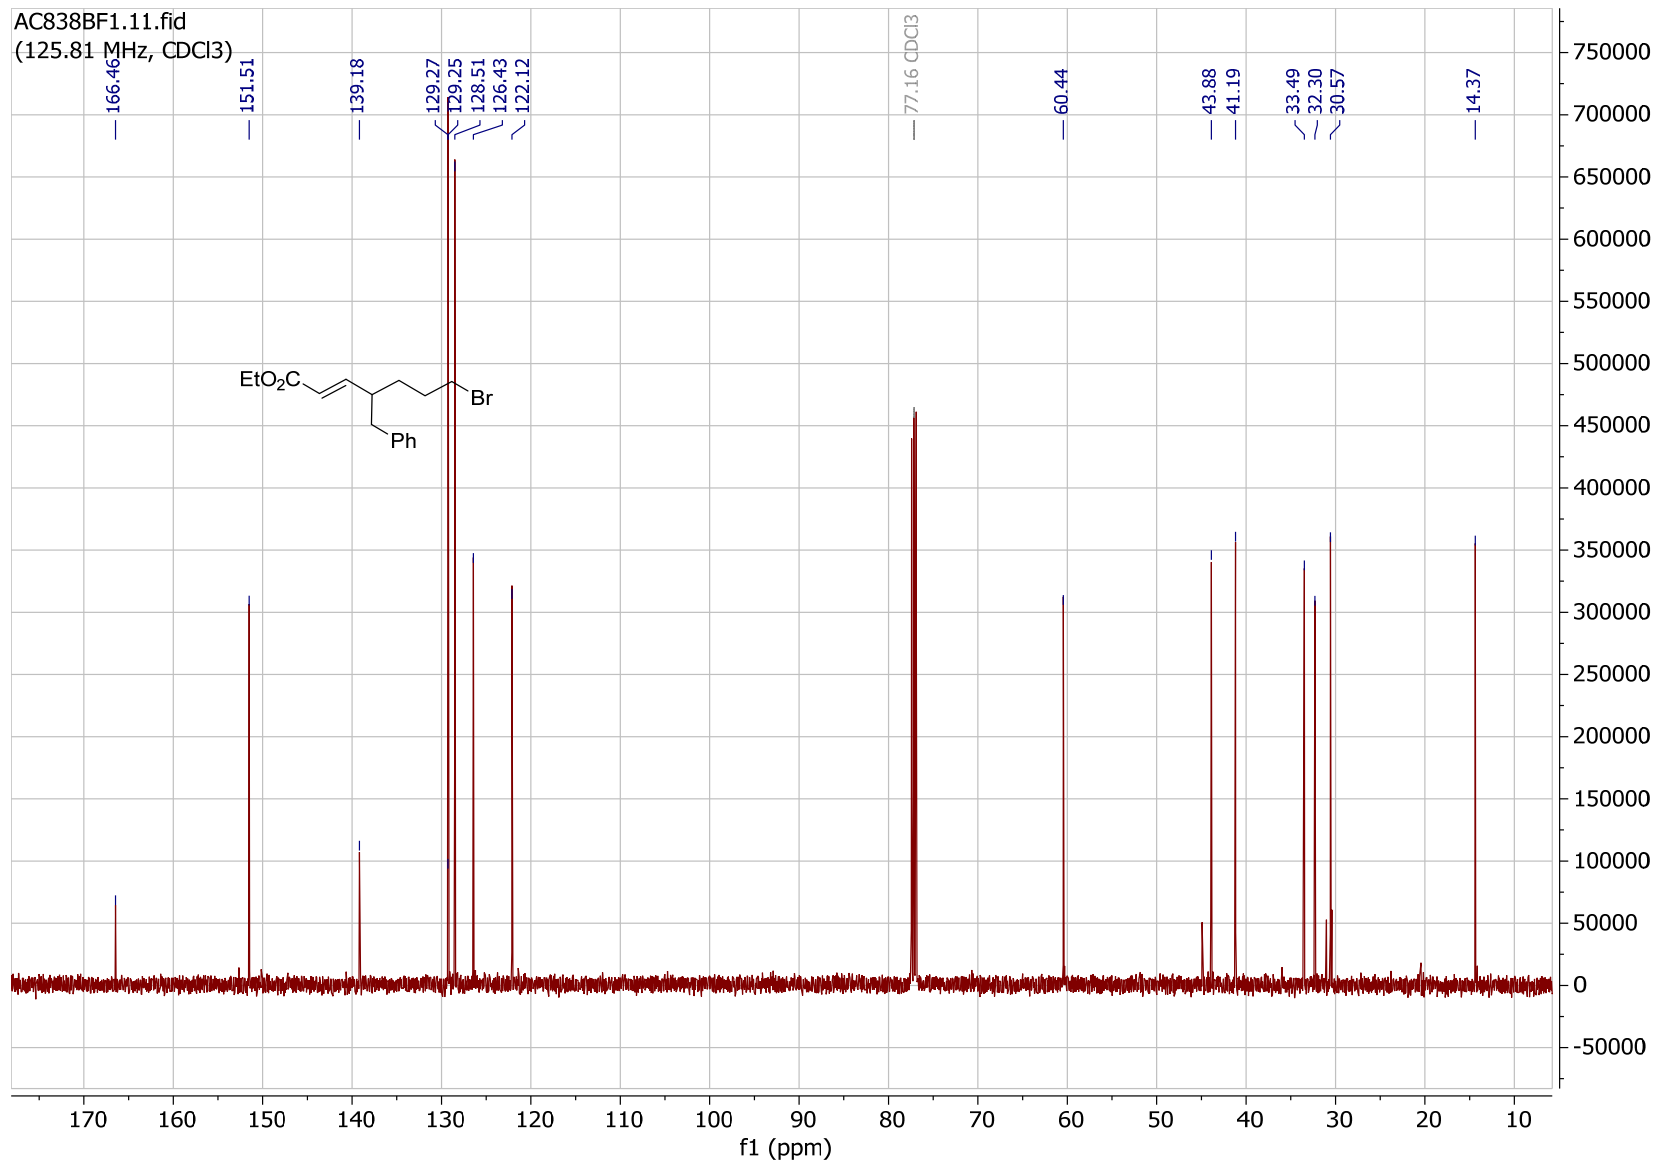

# Ethyl (E)-7-(benzyloxy)-4-(3-bromopropyl)hept-2-enoate 3bb

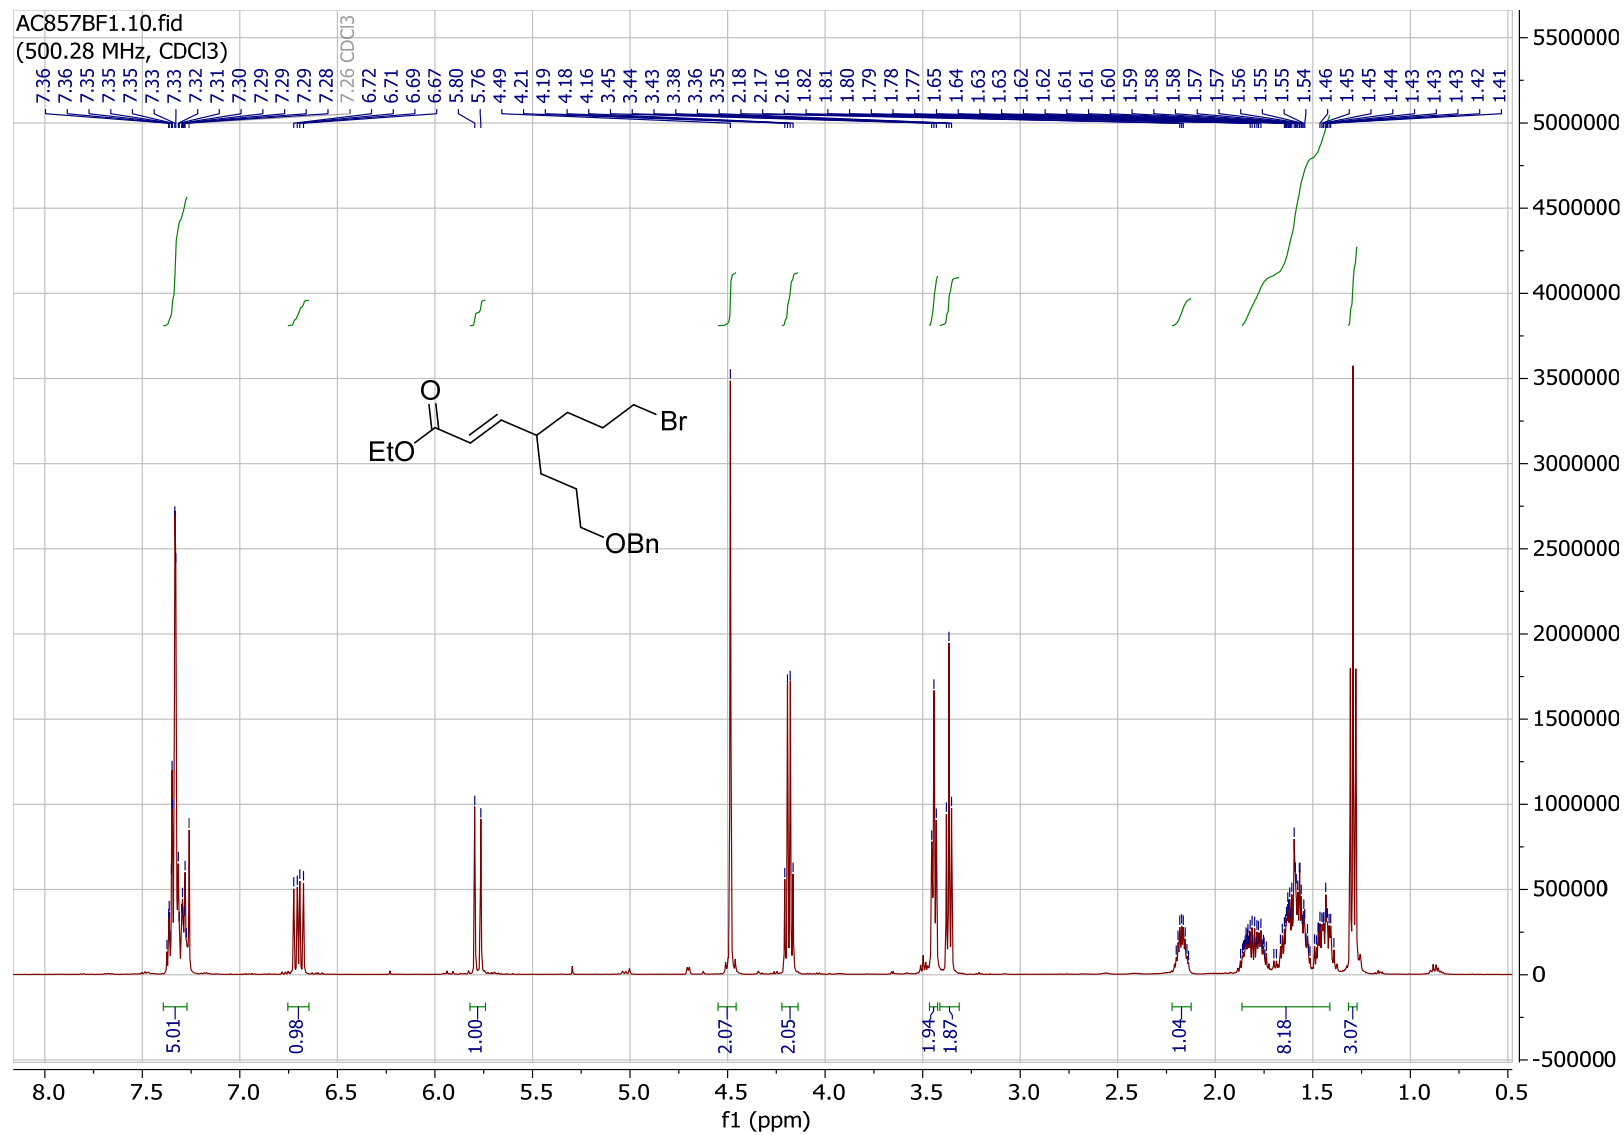

AC857BF1.11.fid  
(125.81 MHz, CDCl3)

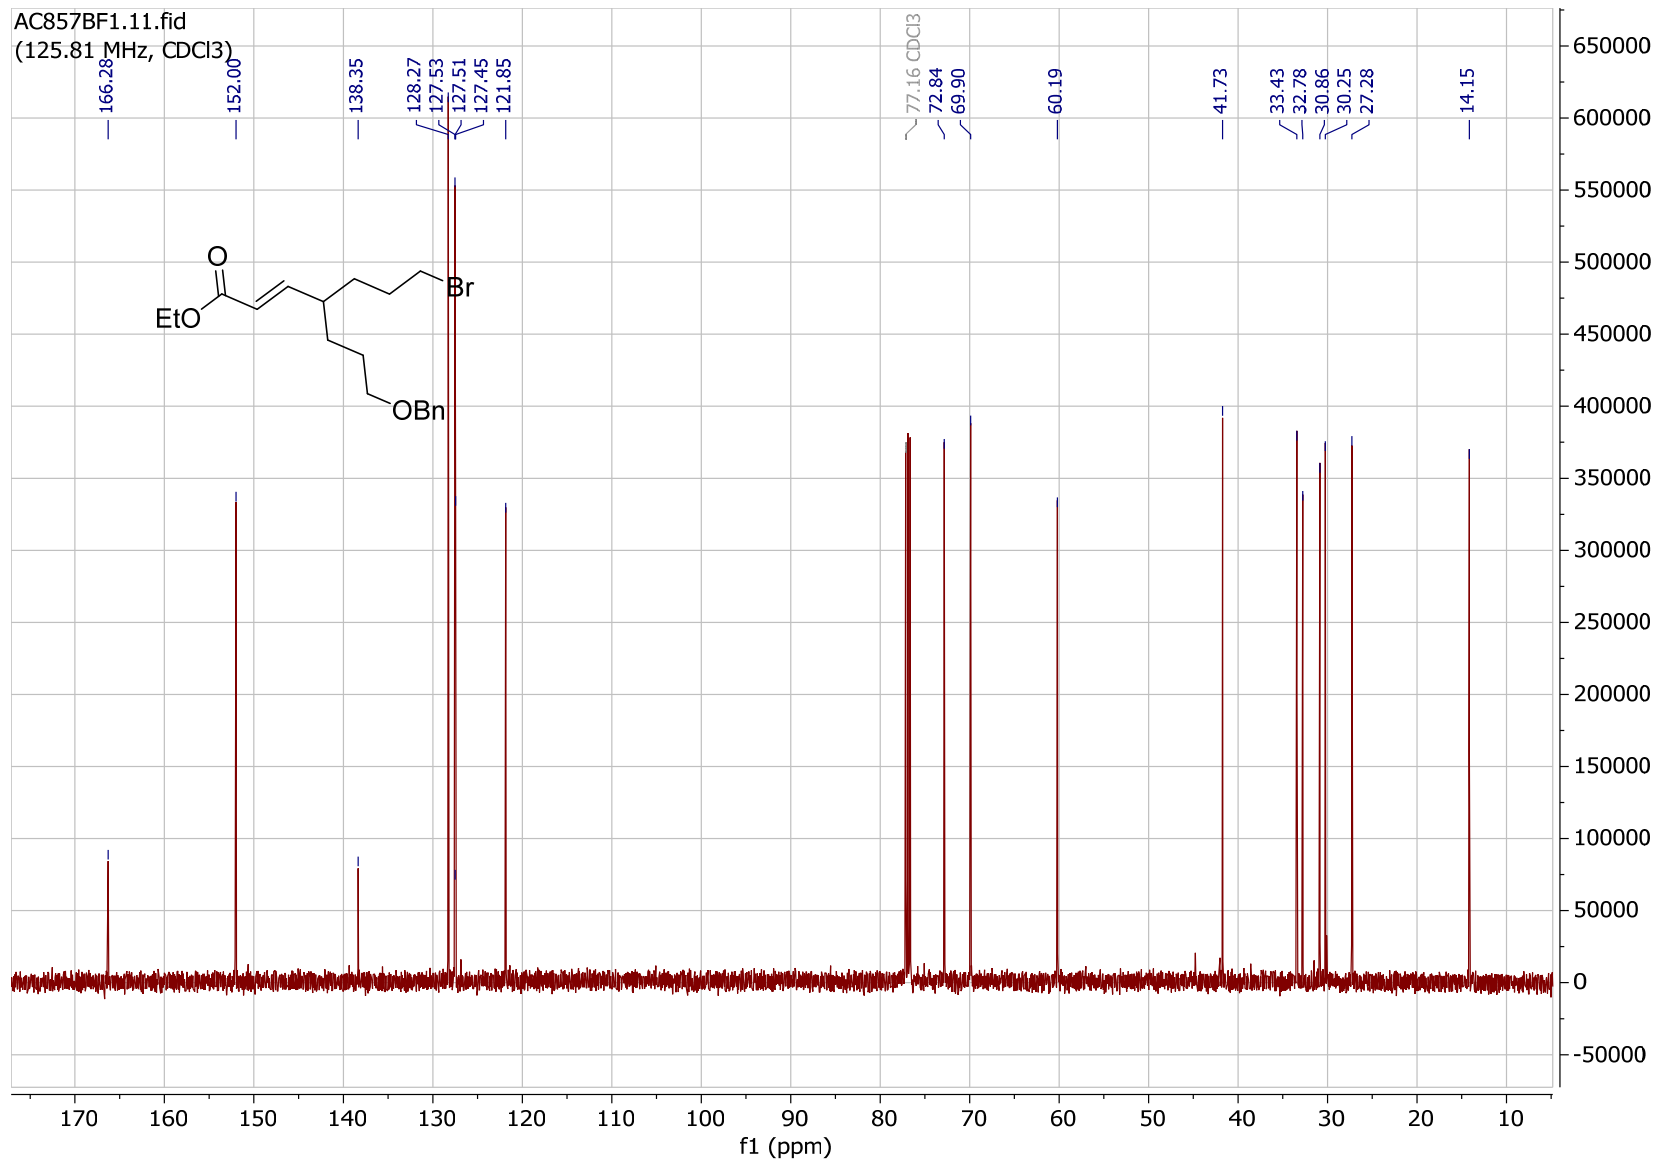

# Ethyl (E)-4-(3-bromopropyl)-7-methyloct-2-enoate 3bc

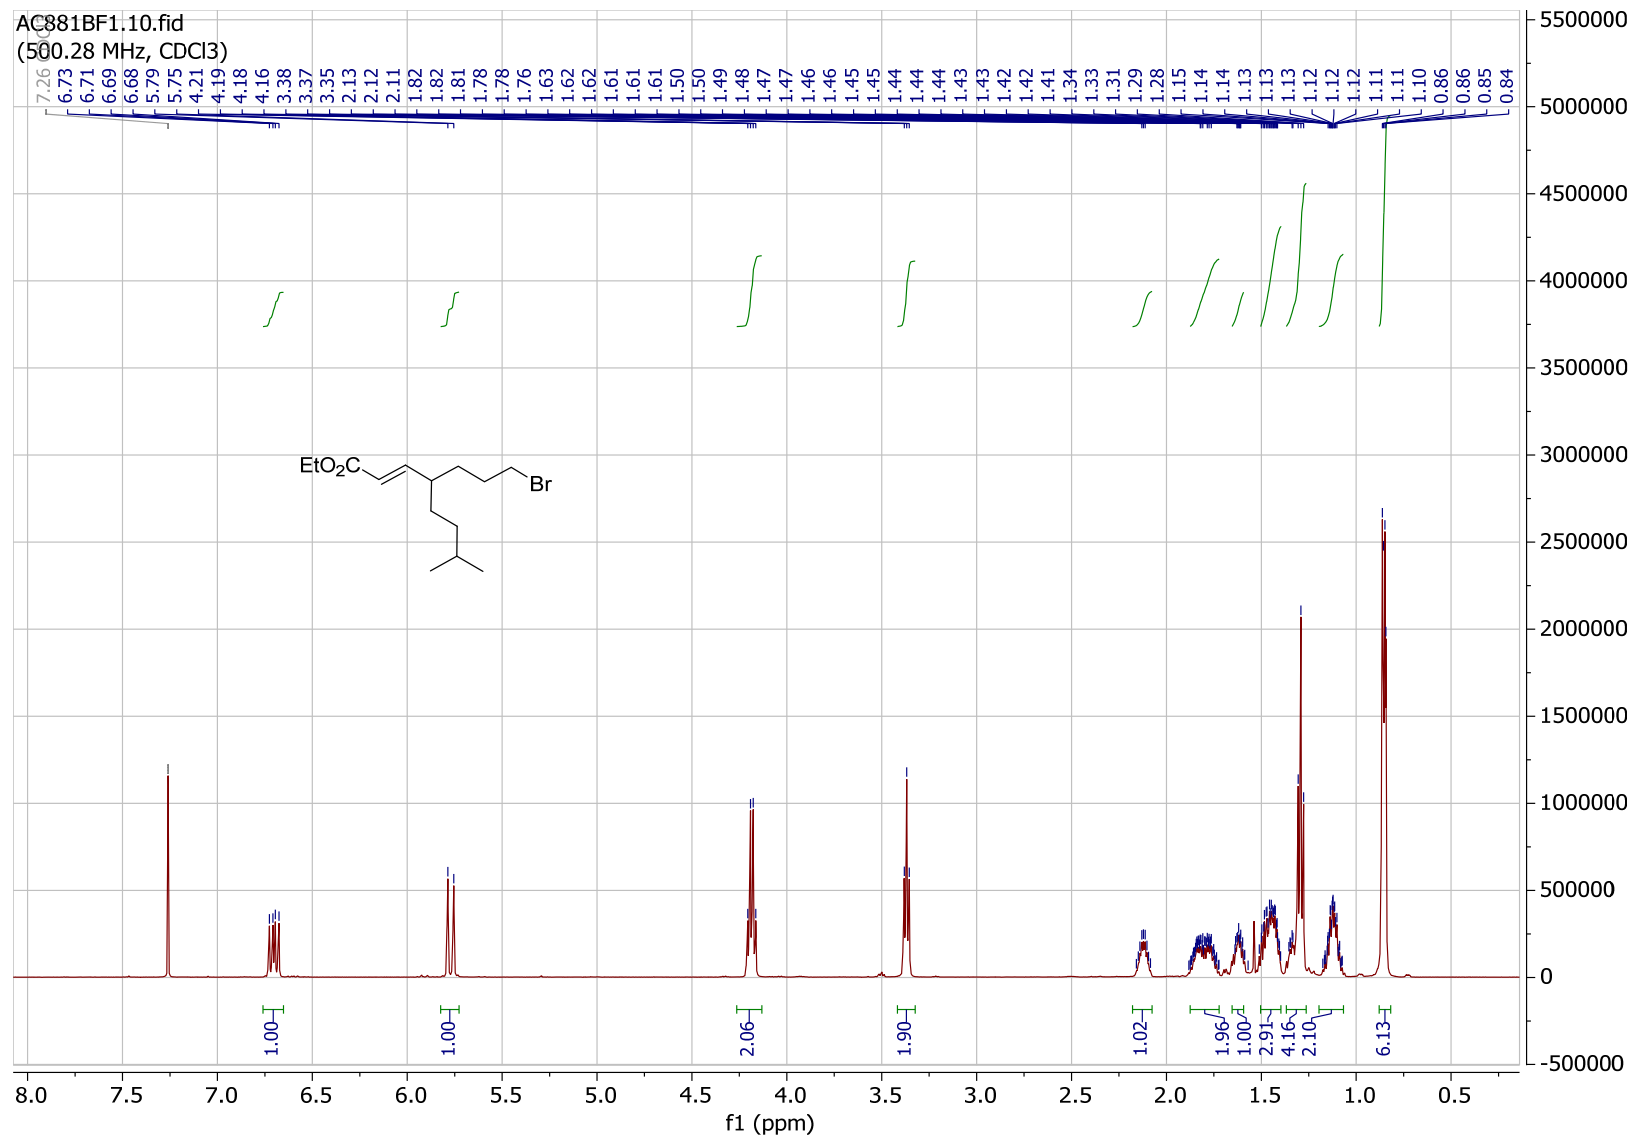

AC881BF1.12.fid  
(125.81 MHz, CDCl<sub>3</sub>)

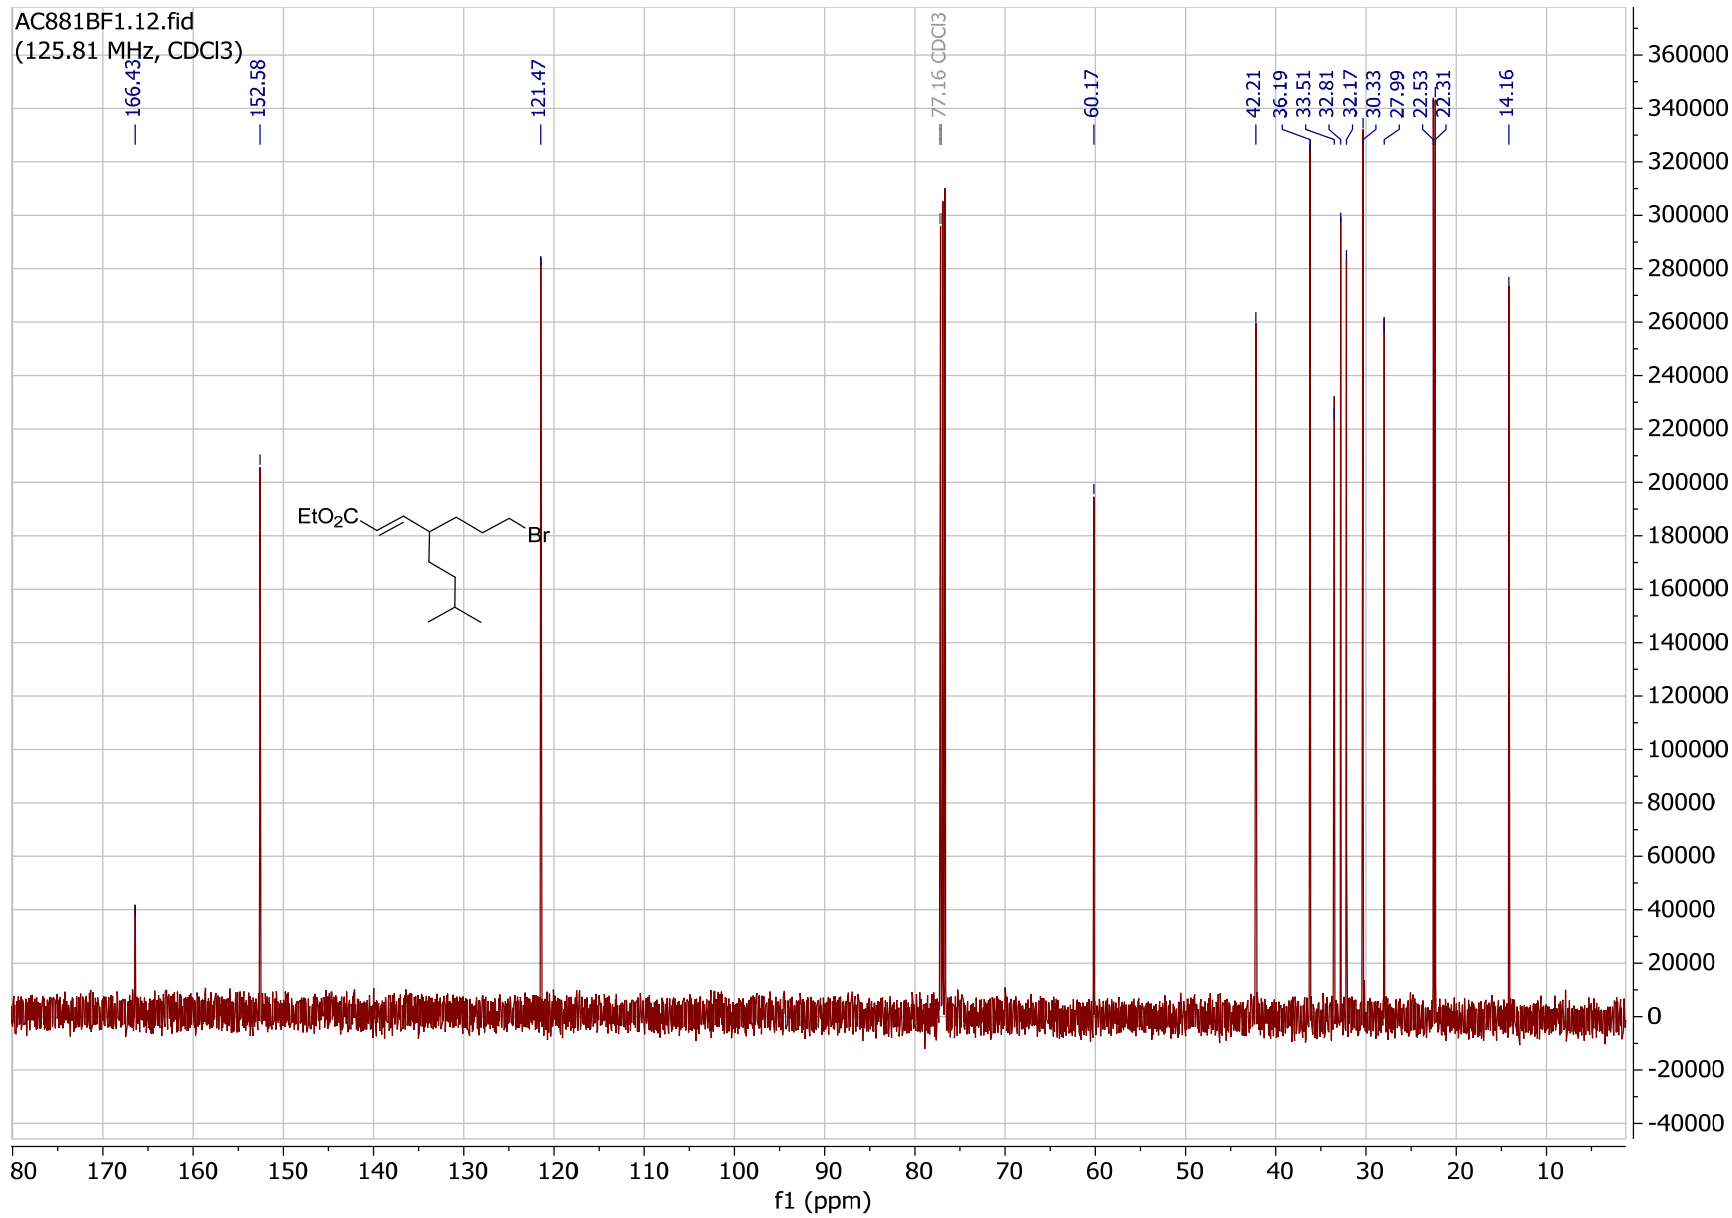

Ethyl (E)-7-bromo-4-phenylhept-2-enoate 3bd

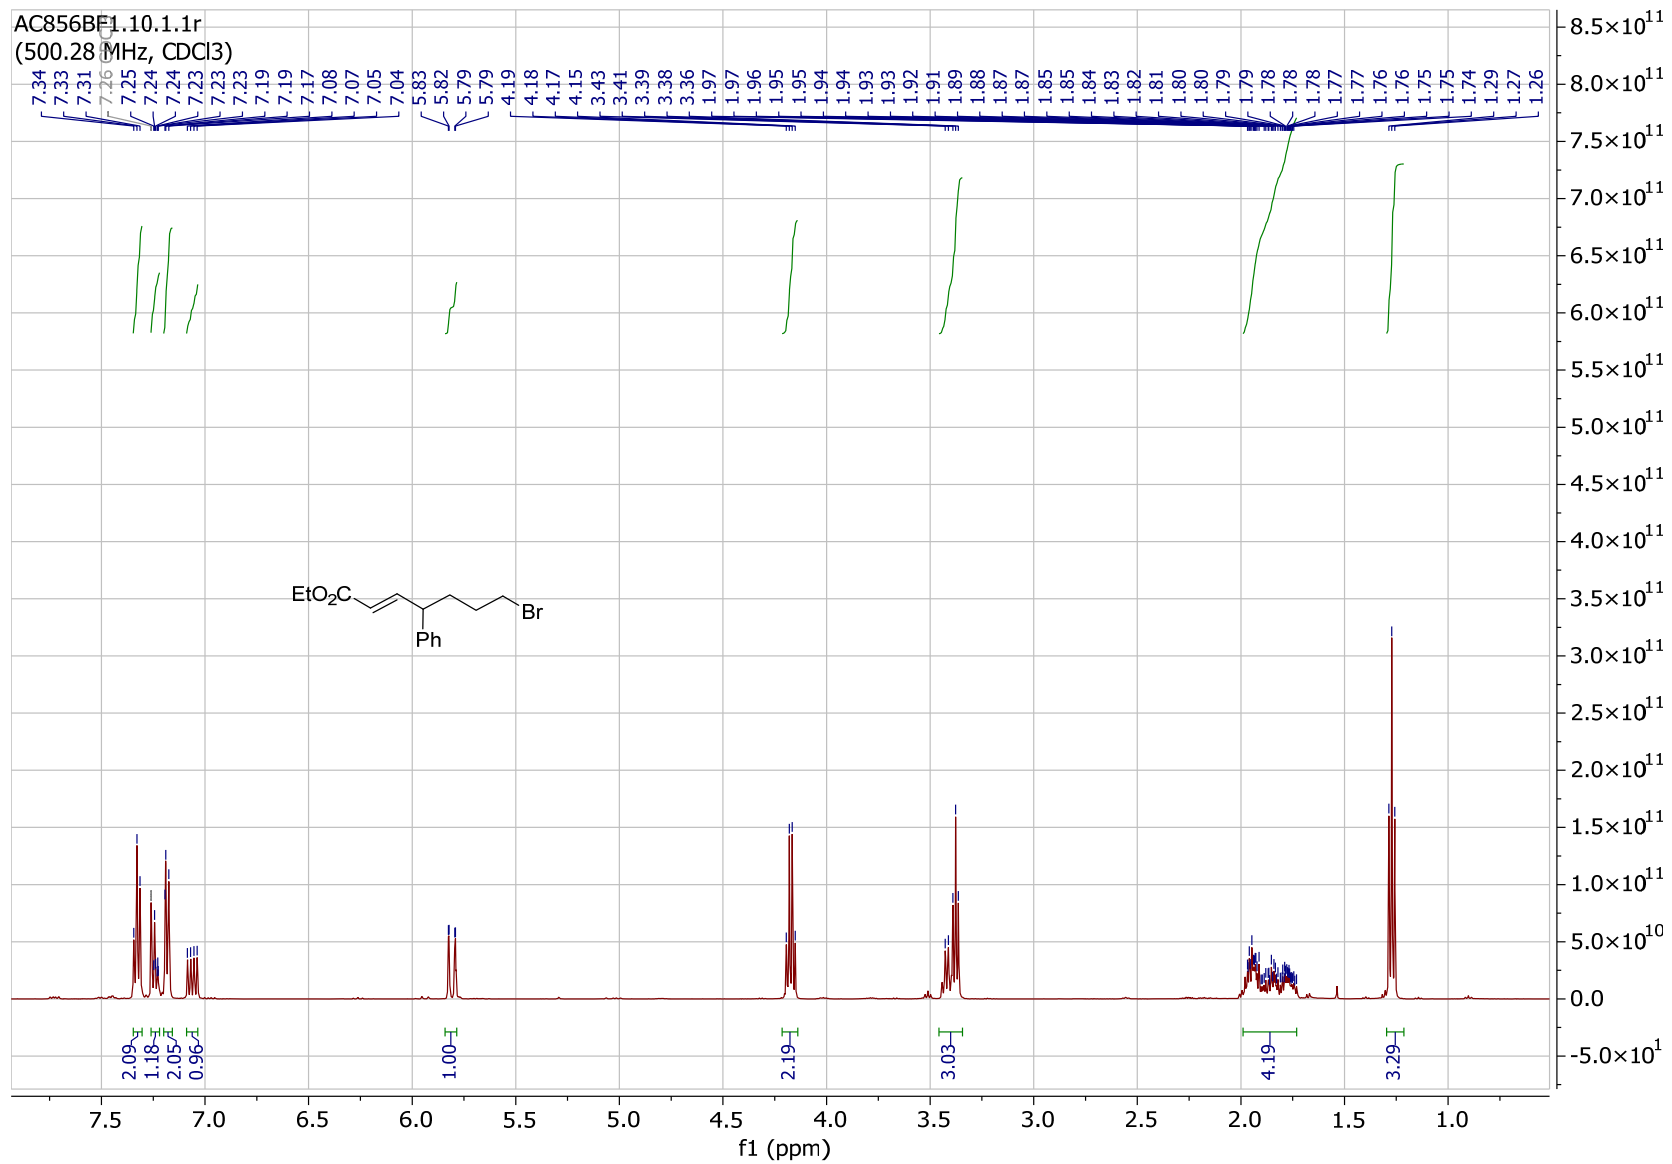

AC856BF1.11.fid  
(125.81 MHz, CDCl<sub>3</sub>)

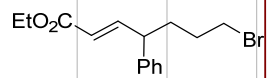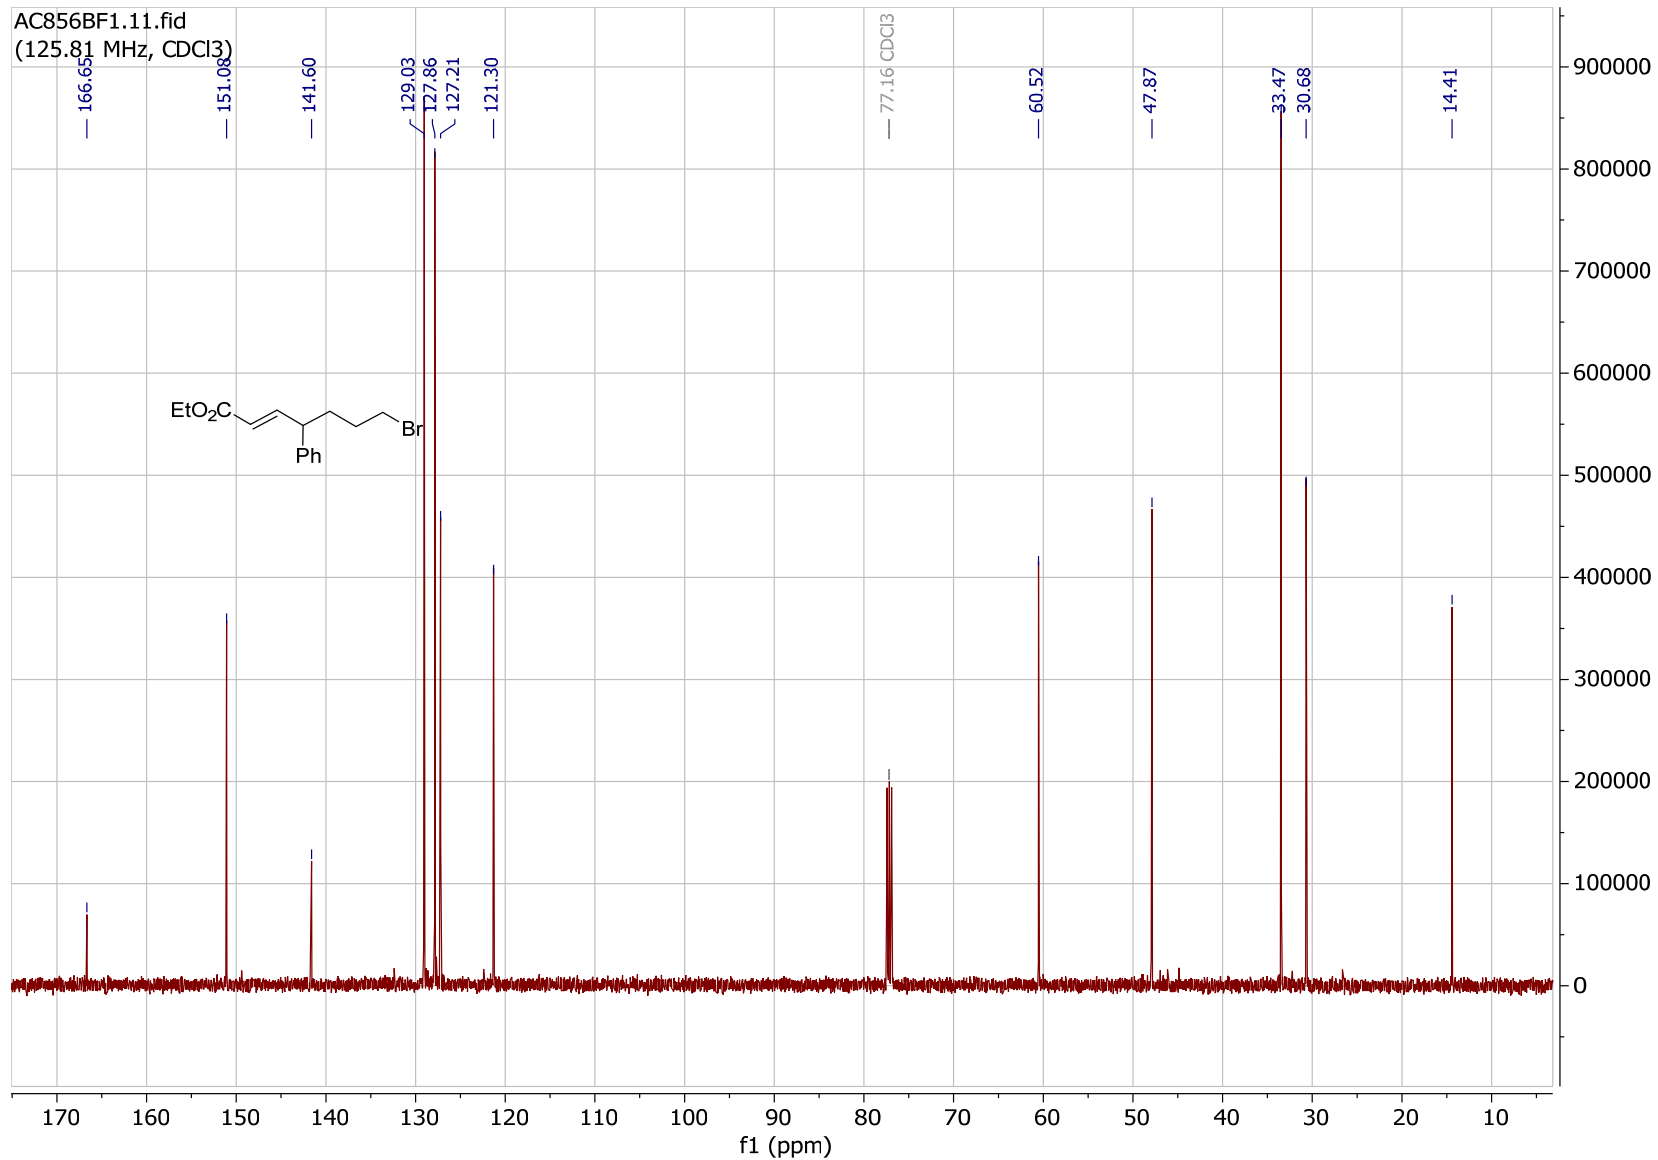



Ethyl (E)-7-bromo-4-(4-methoxyphenyl)hept-2-enoate 3be

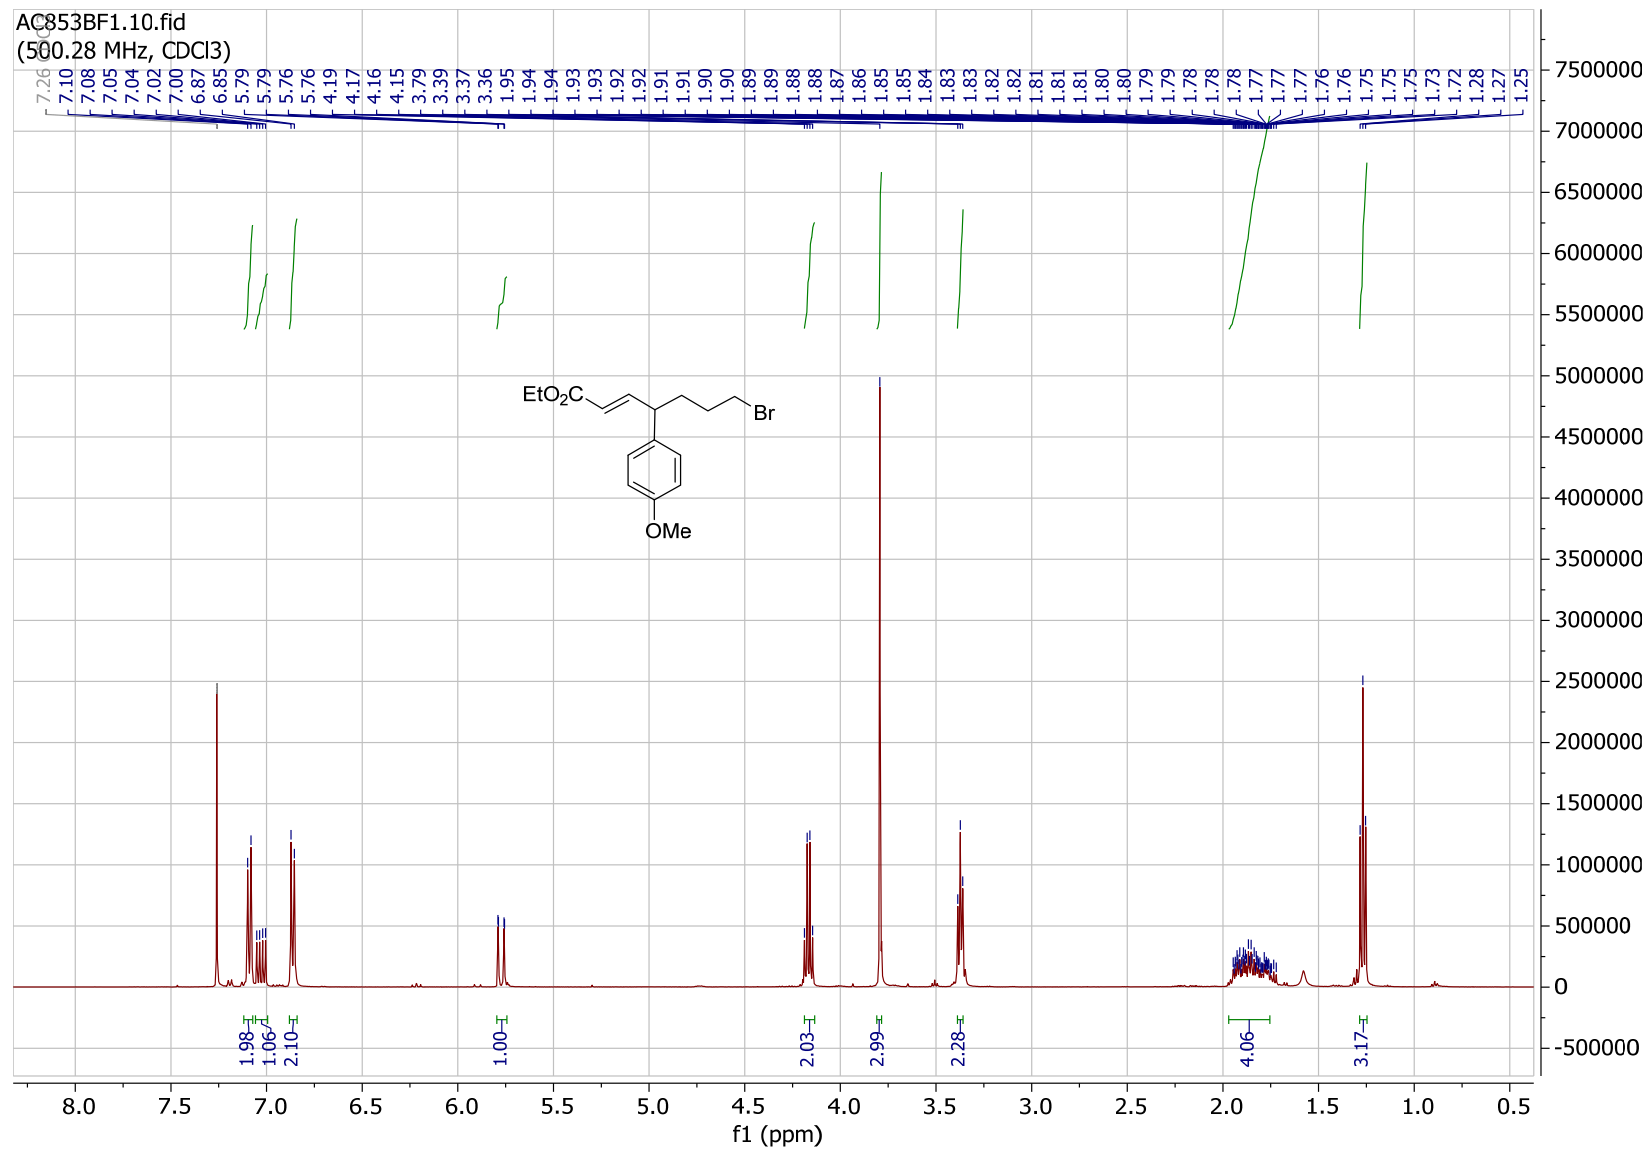

AC853BF1.11.fid  
(125.81 MHz, CDCl<sub>3</sub>)

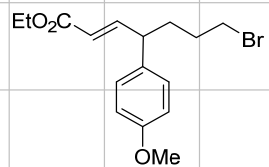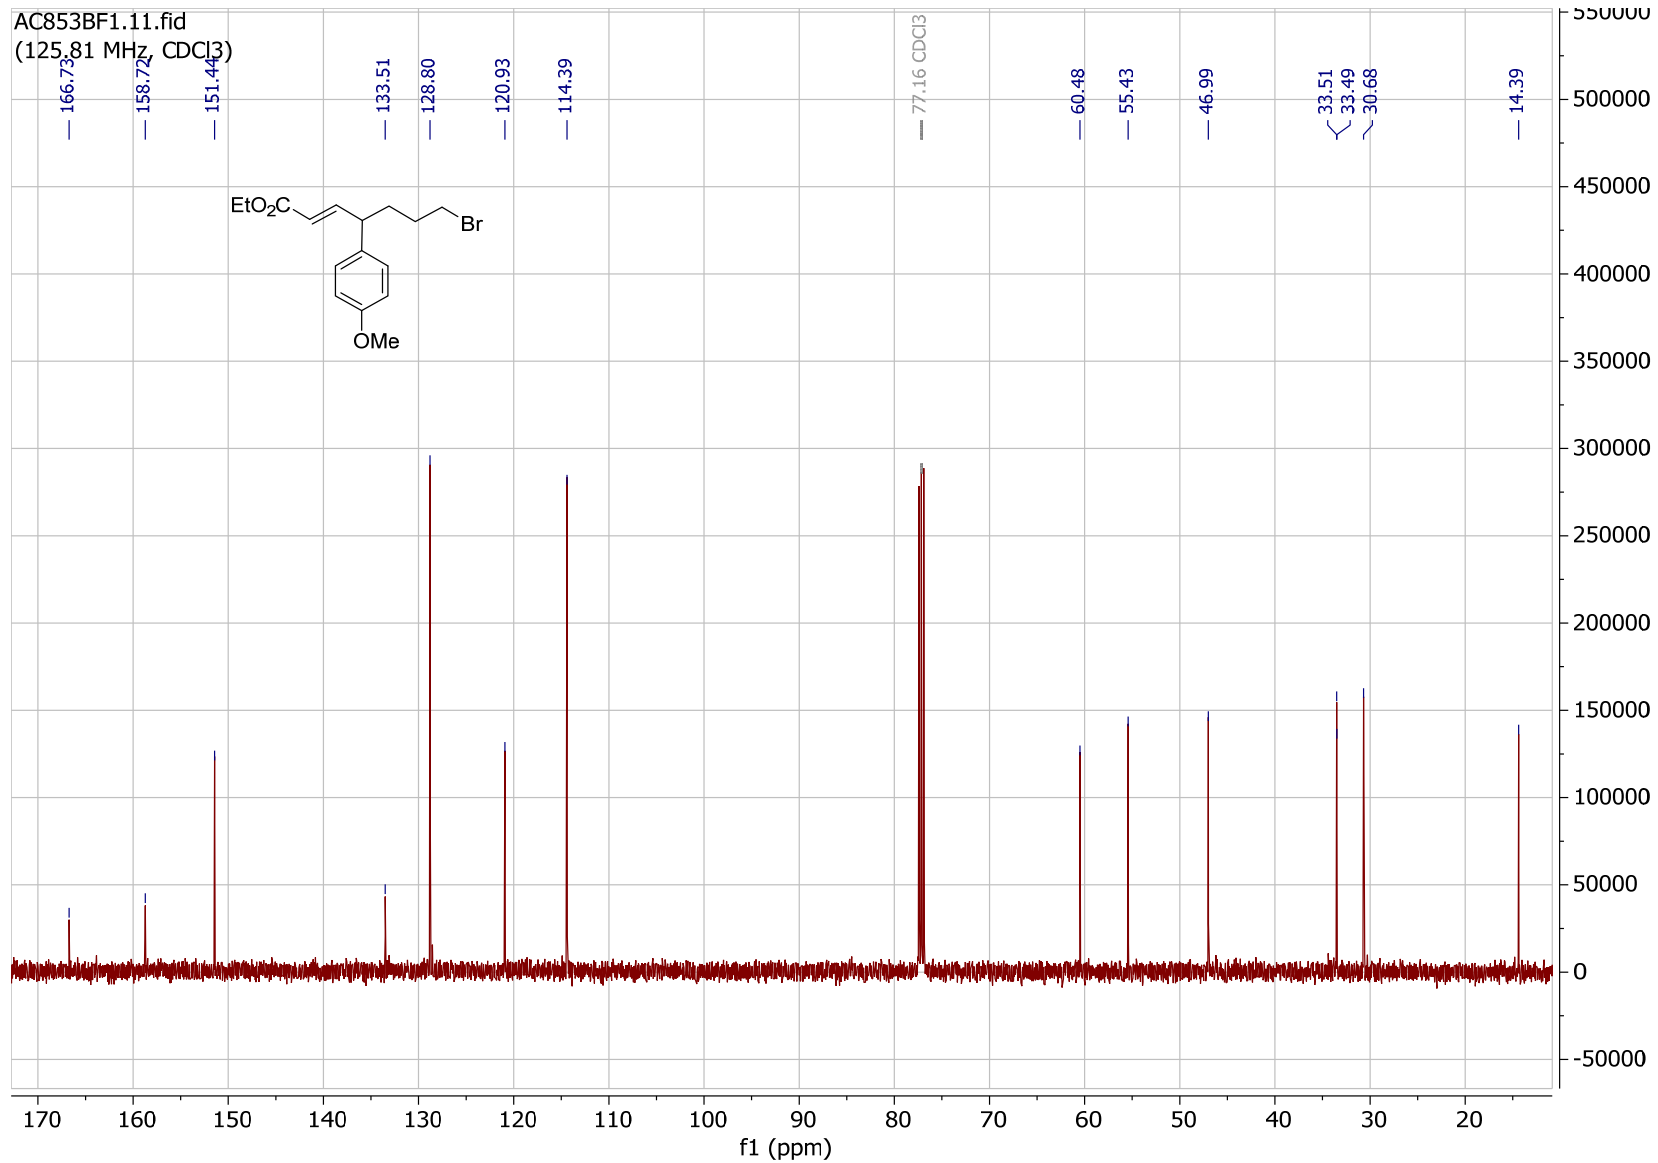

**Ethyl (E)-7-bromo-4-(4-fluorophenyl)hept-2-enoate 3bf**

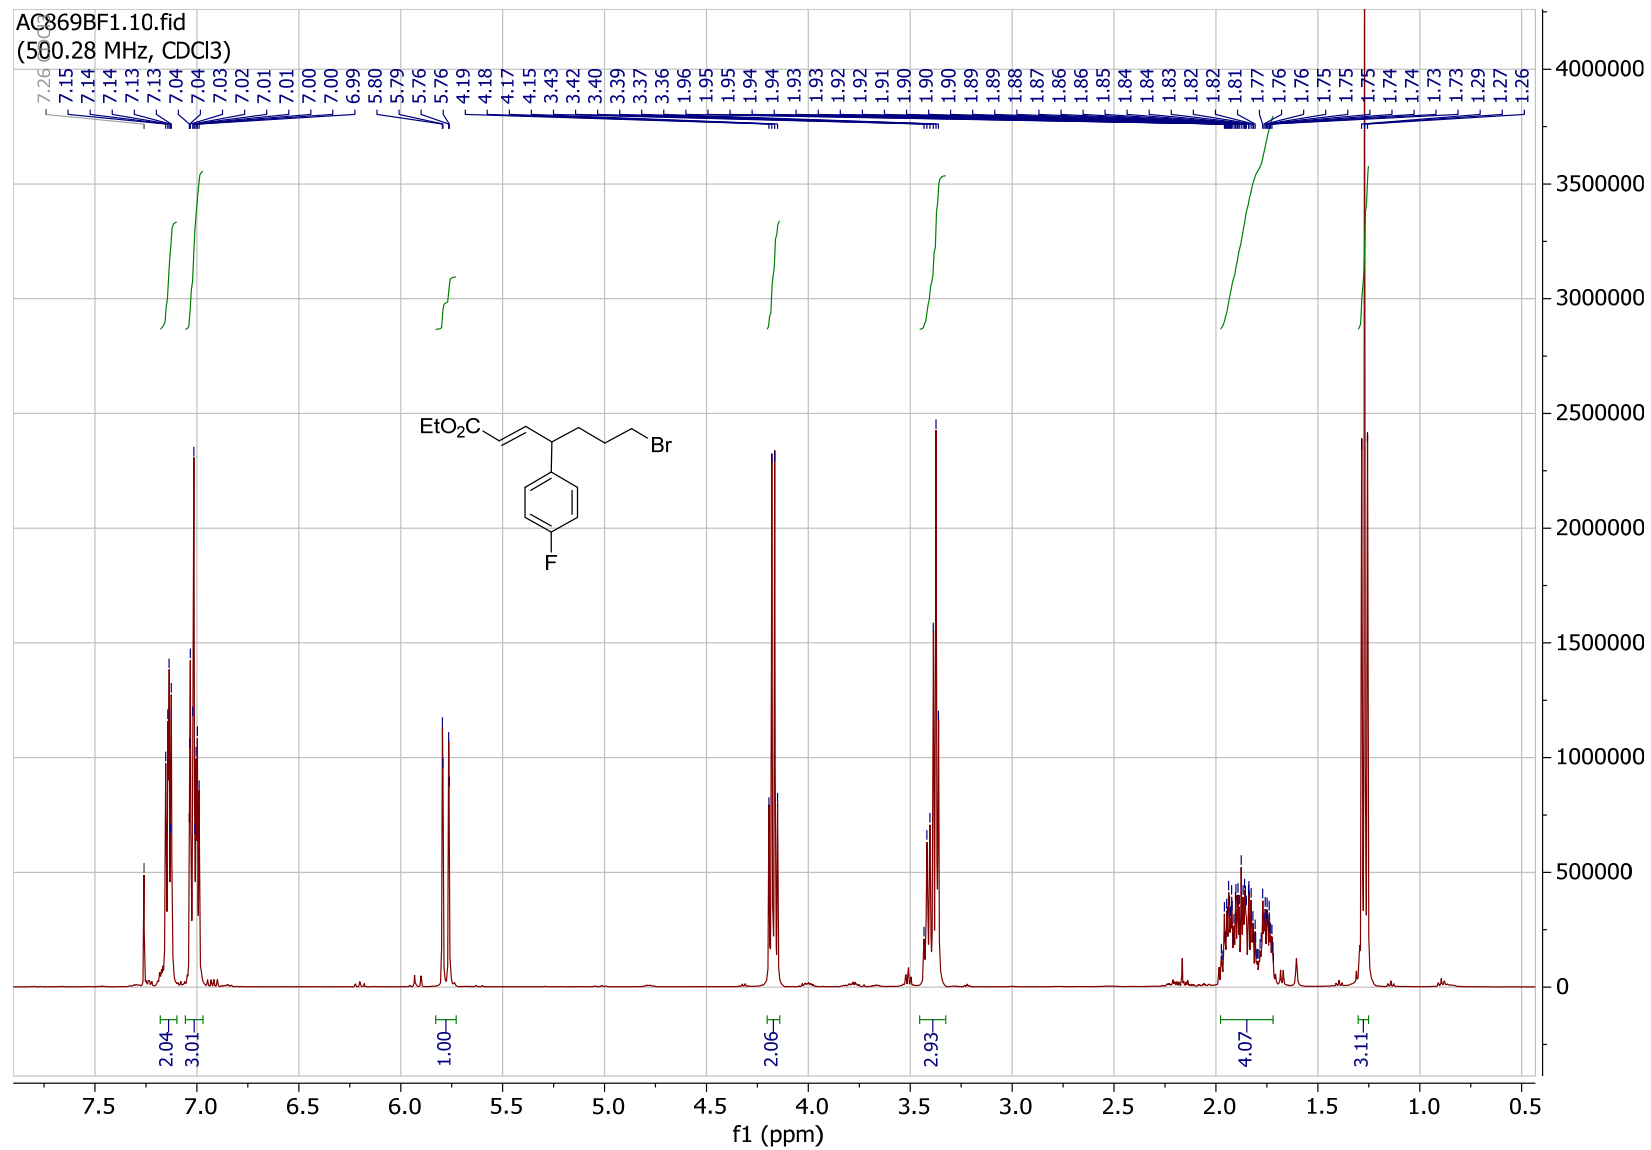

AC869BF1.11.fid  
(125.81 MHz, CDCl<sub>3</sub>)

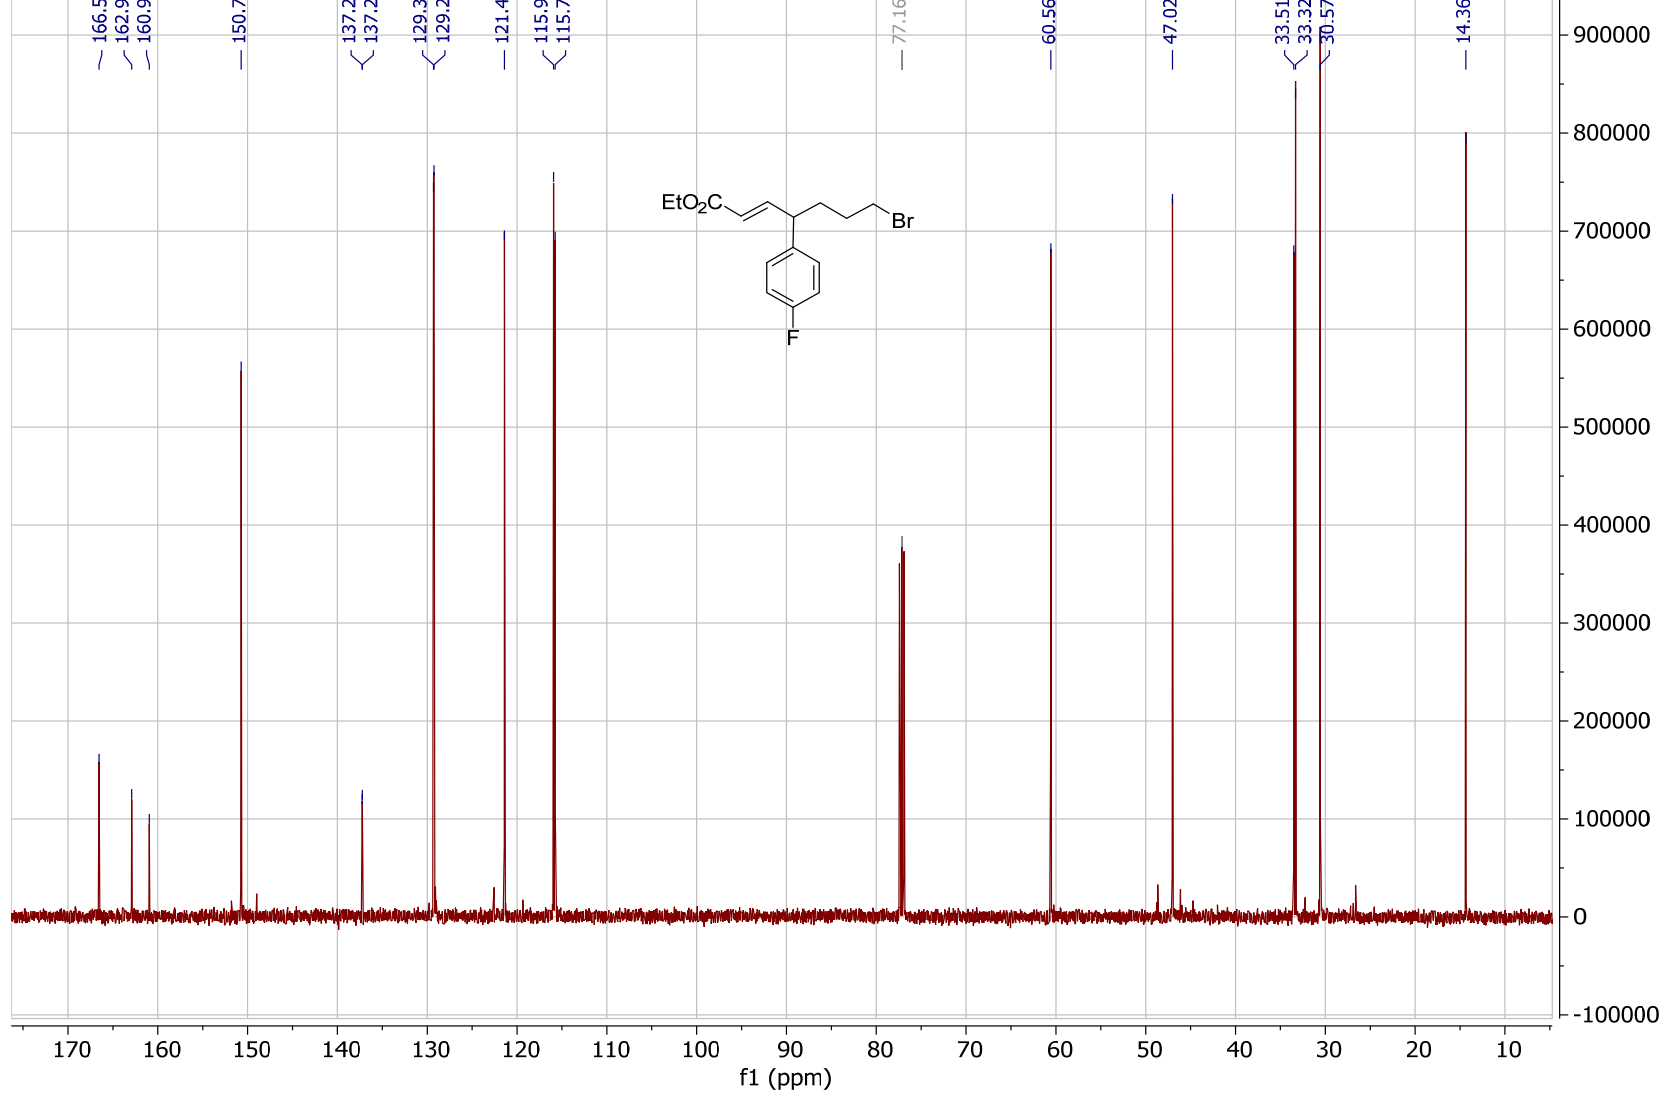

AC869BF1.12.fid  
(470.70 MHz, CDCl<sub>3</sub>)

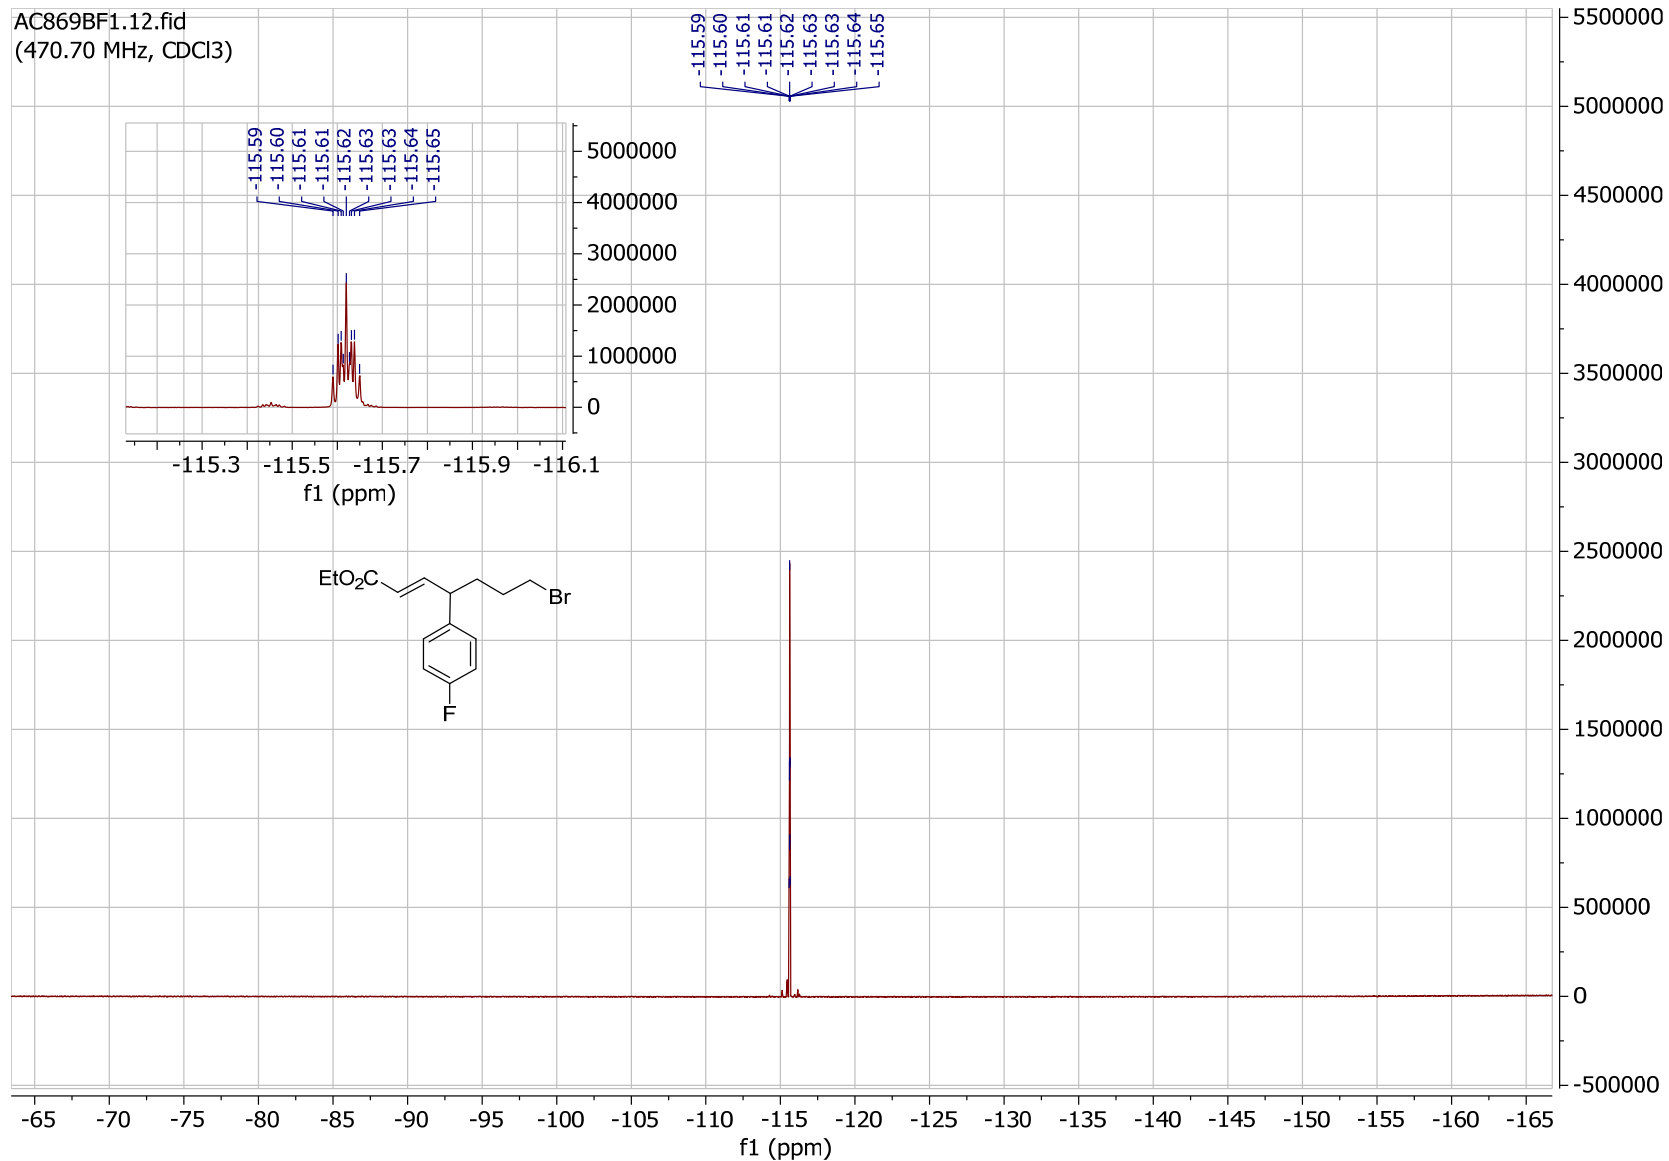

# Ethyl (E)-7-bromo-4-(2-bromophenyl)hept-2-enoate 3bg

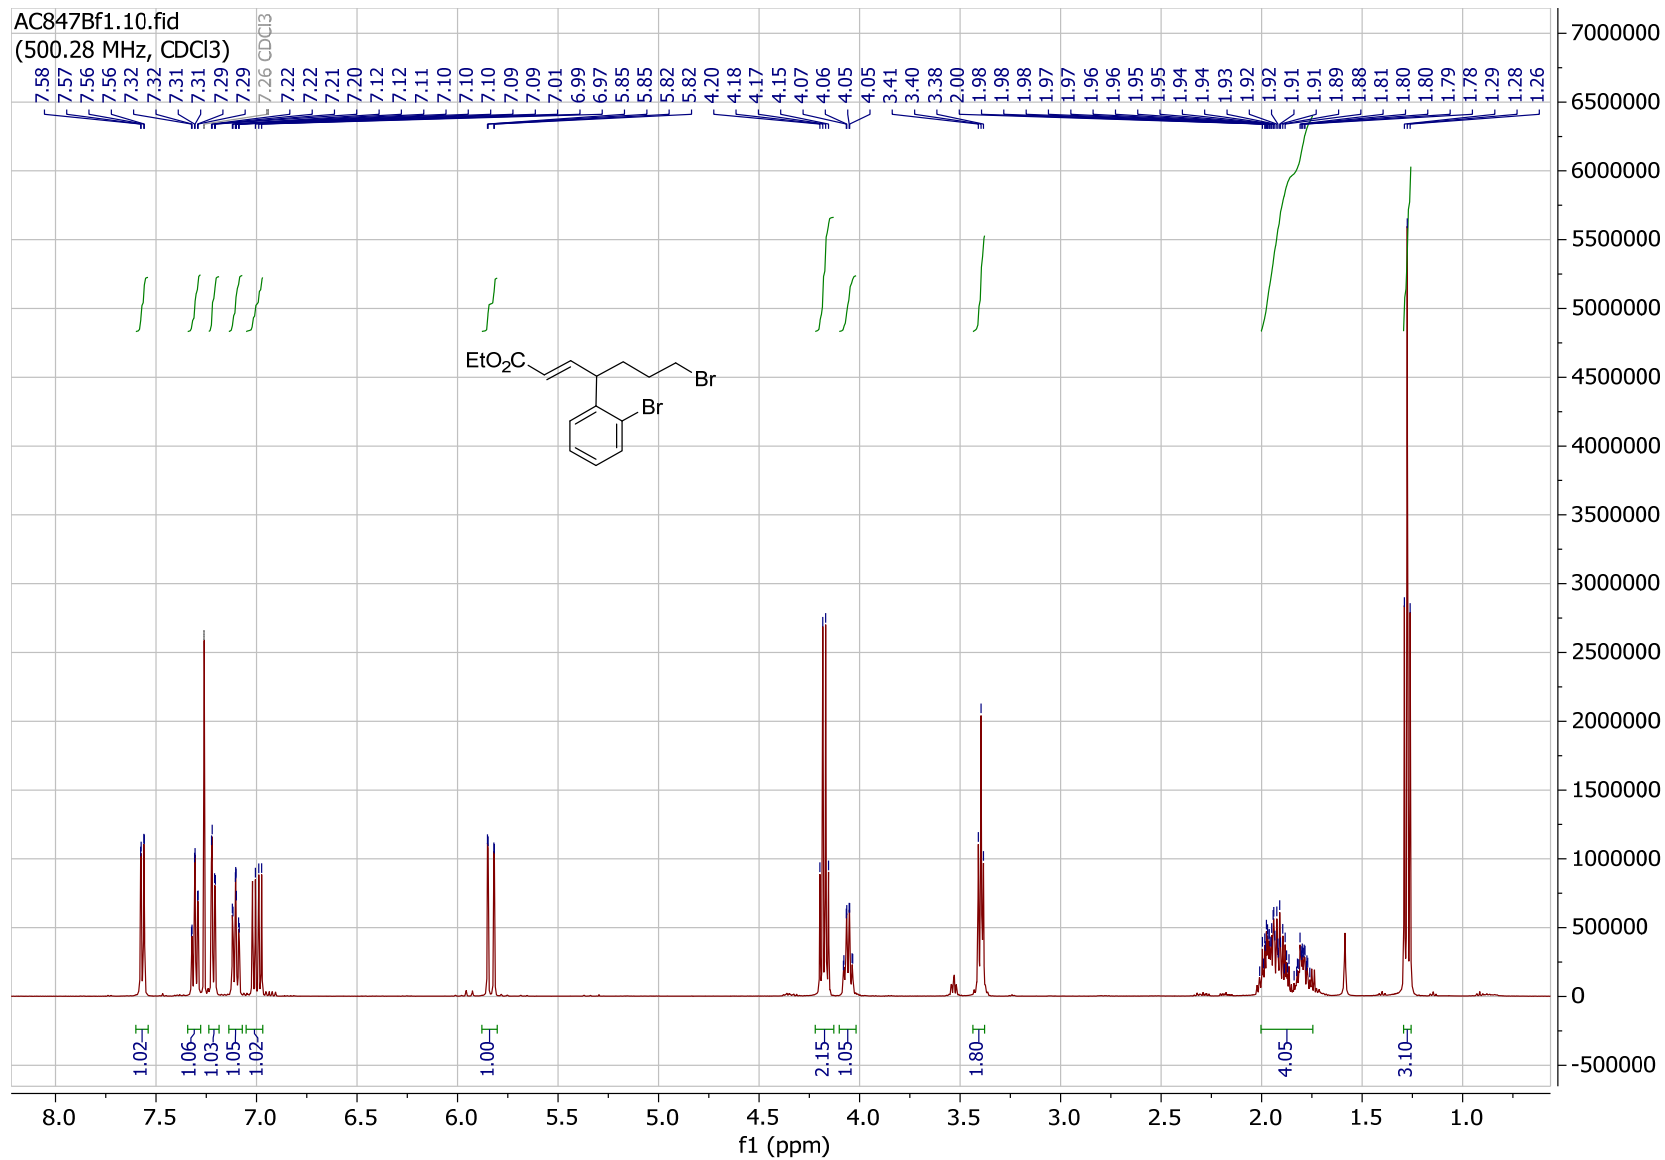

AC847Bf1.11.fid  
(125.81 MHz, CDCl<sub>3</sub>)

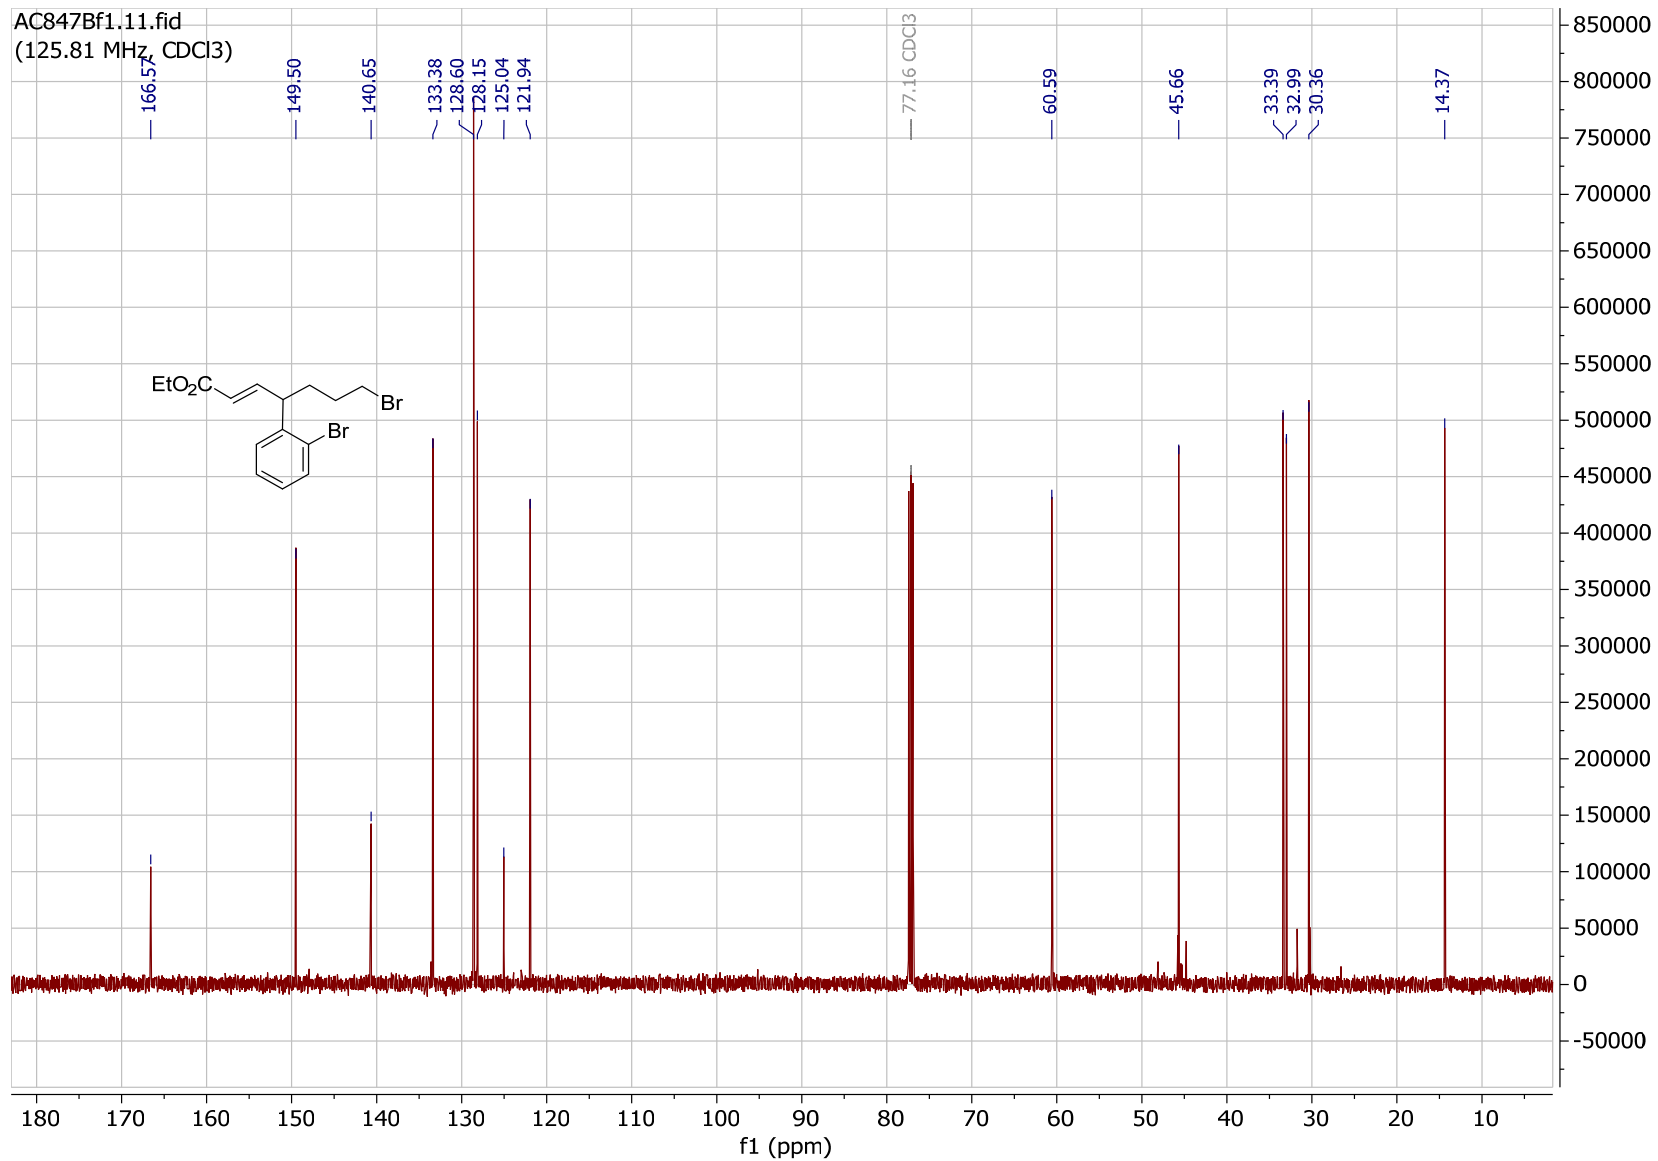

Ethyl (E)-7-bromo-4-(thiophen-2-yl)hept-2-enoate 3bh

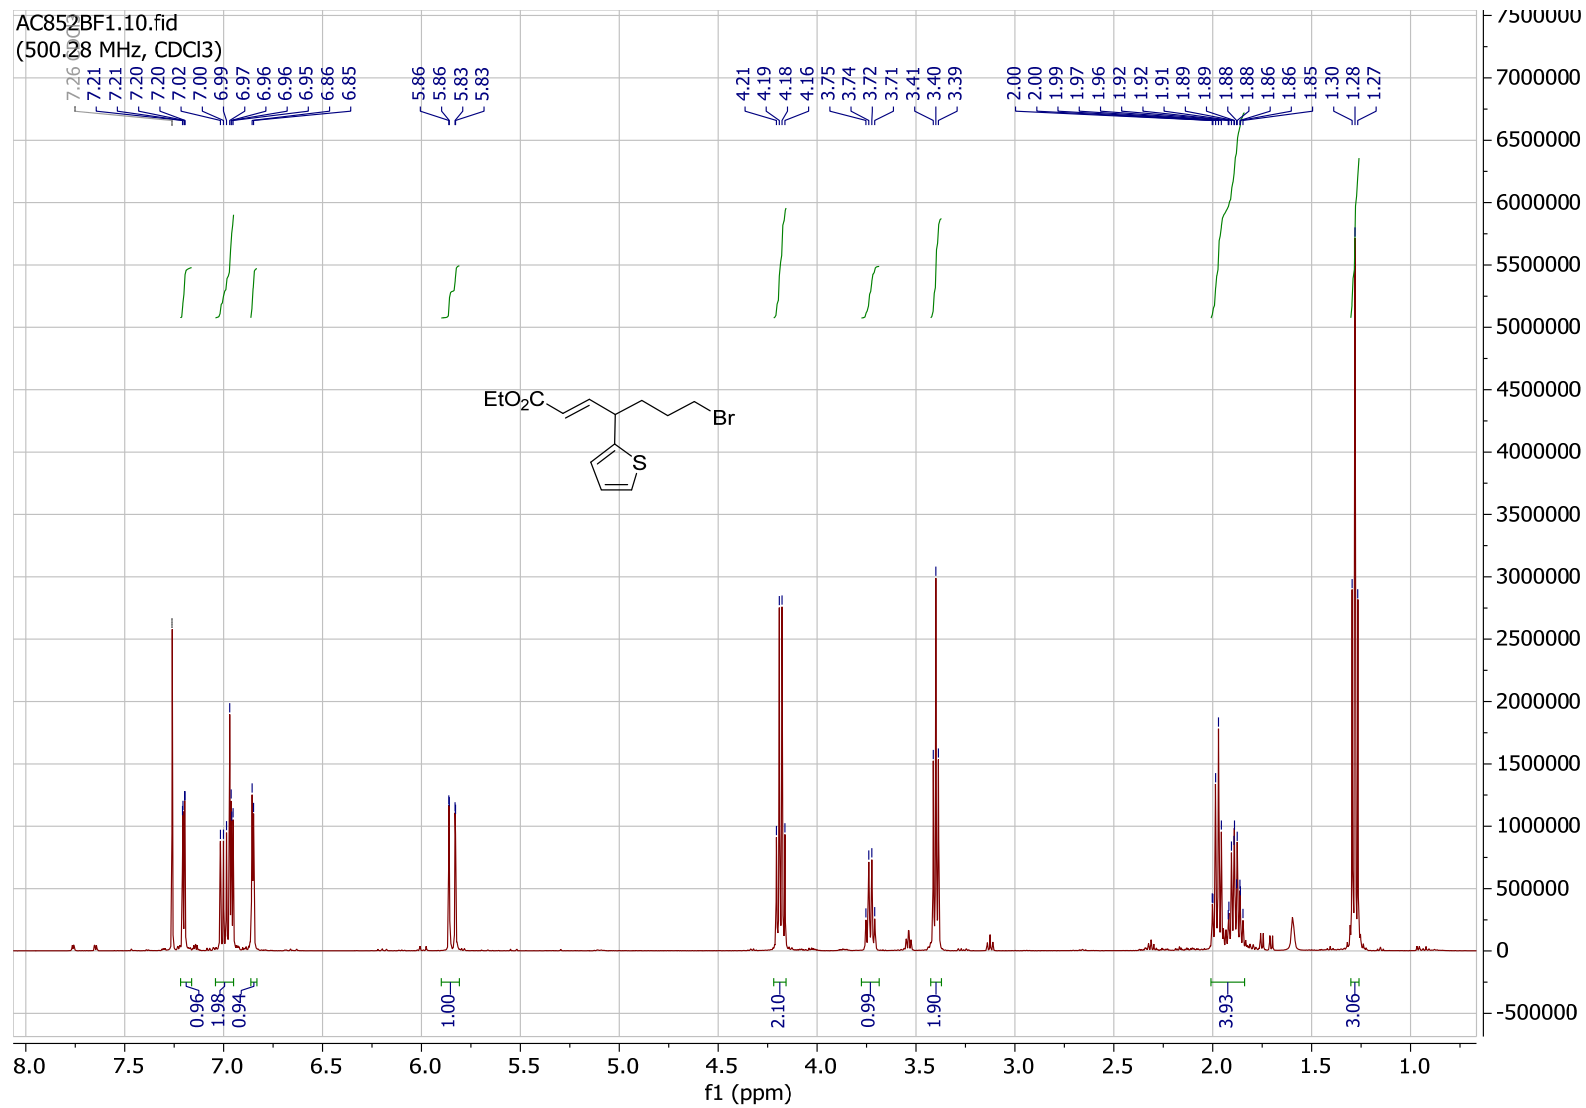



AC852BF1.11.fid  
(125.81 MHz, CDCl3)

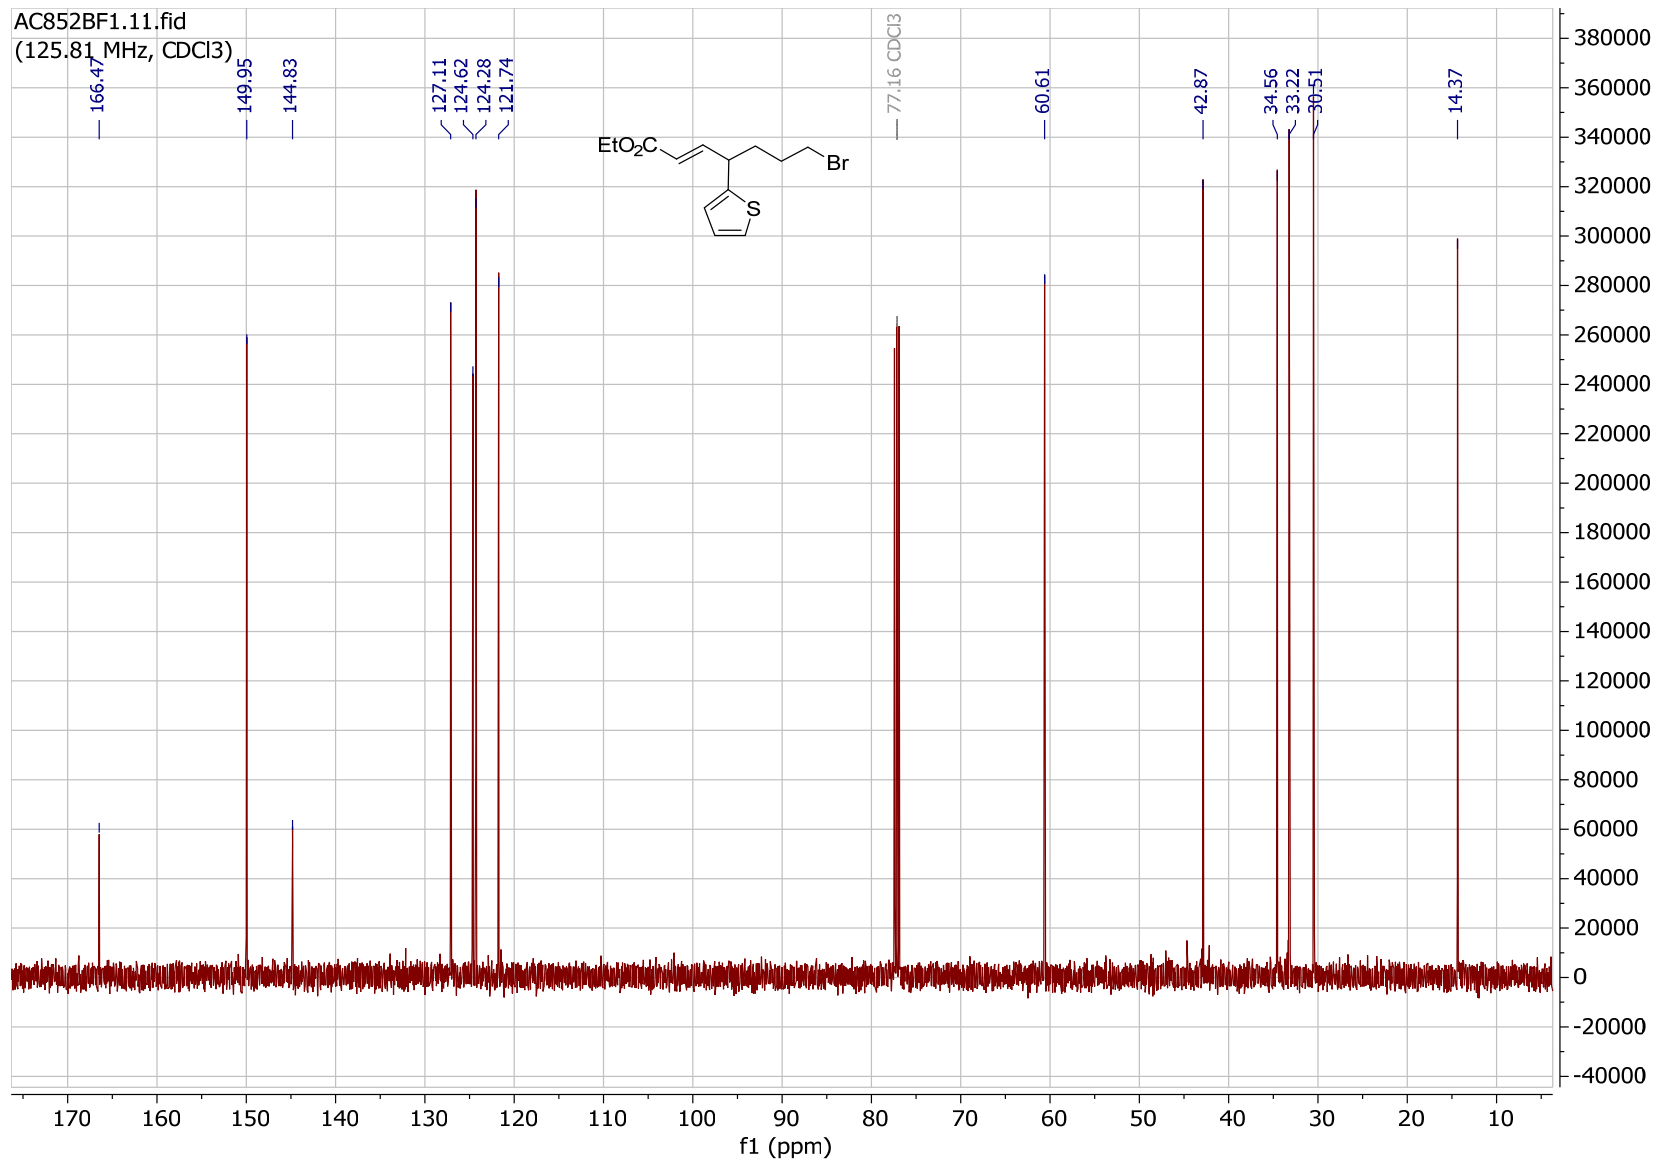

# Ethyl (2E,6E)-4-(3-bromopropyl)-7-phenylhepta-2,6-dienoate 3bi

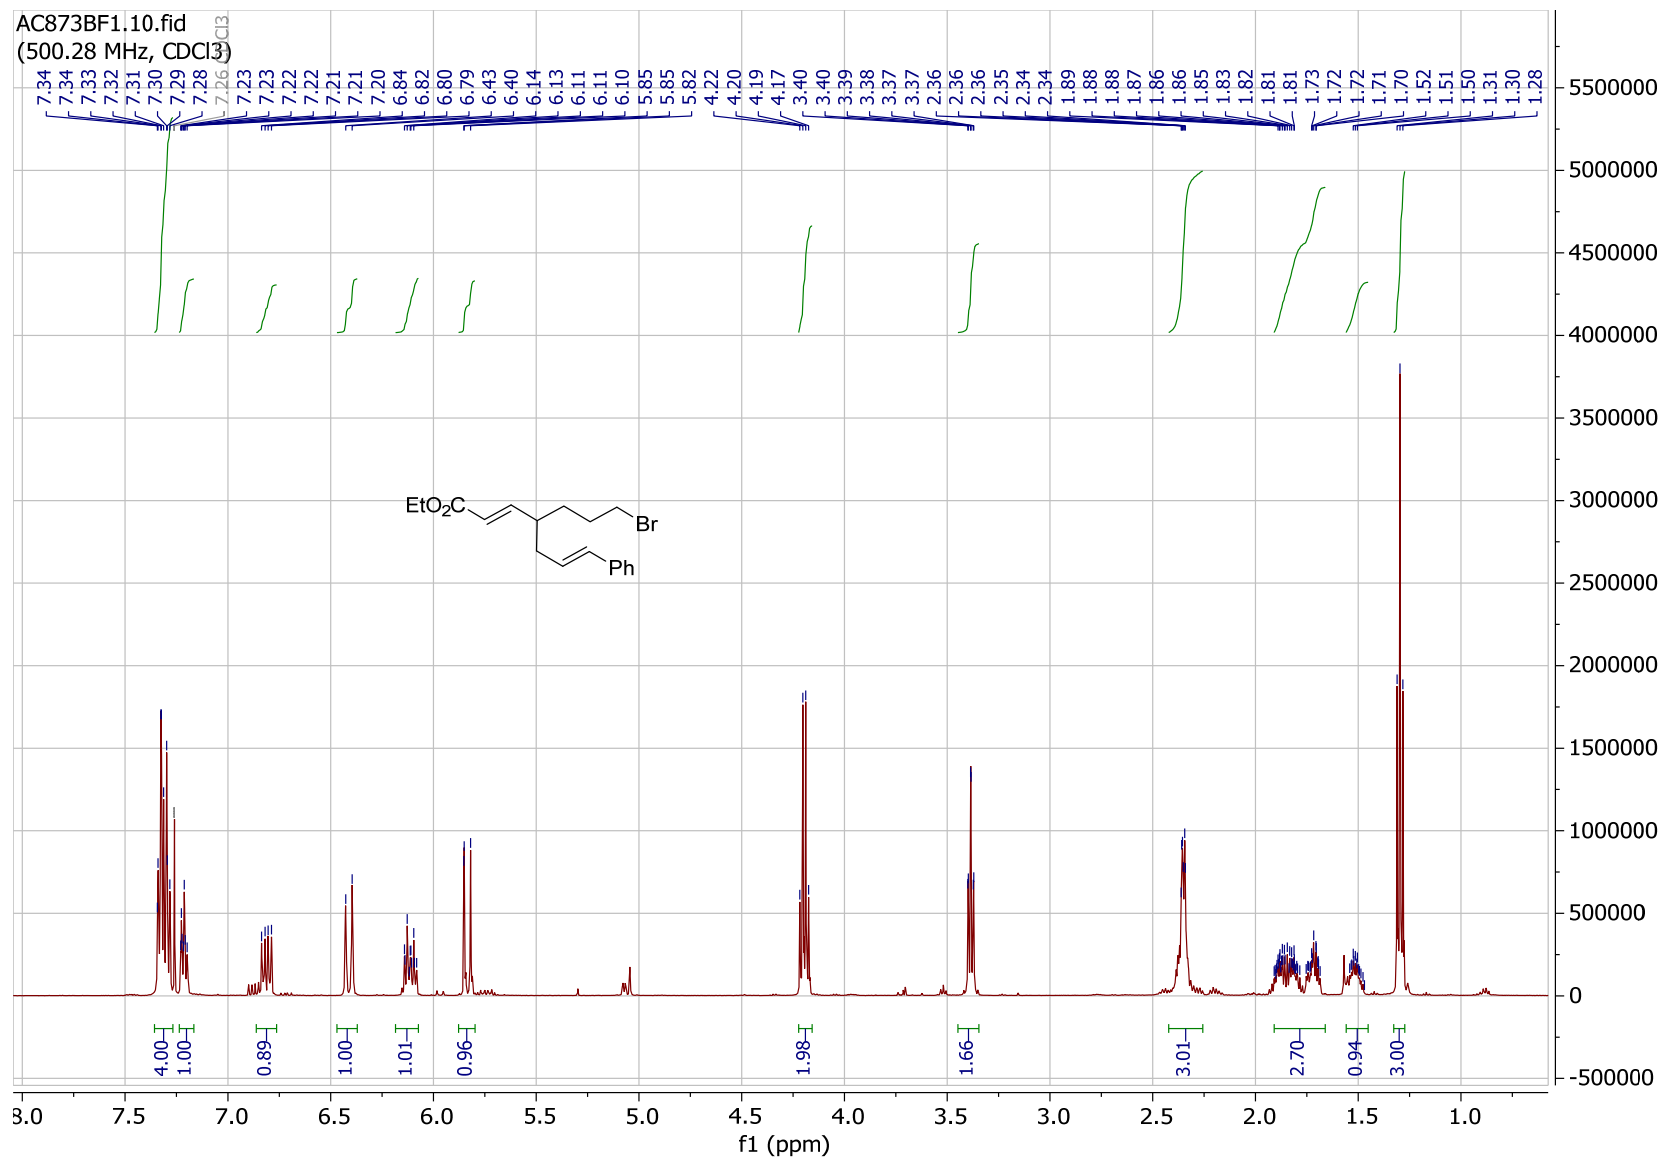

AC873BF1.11.fid  
(125.81 MHz, CDCl<sub>3</sub>)

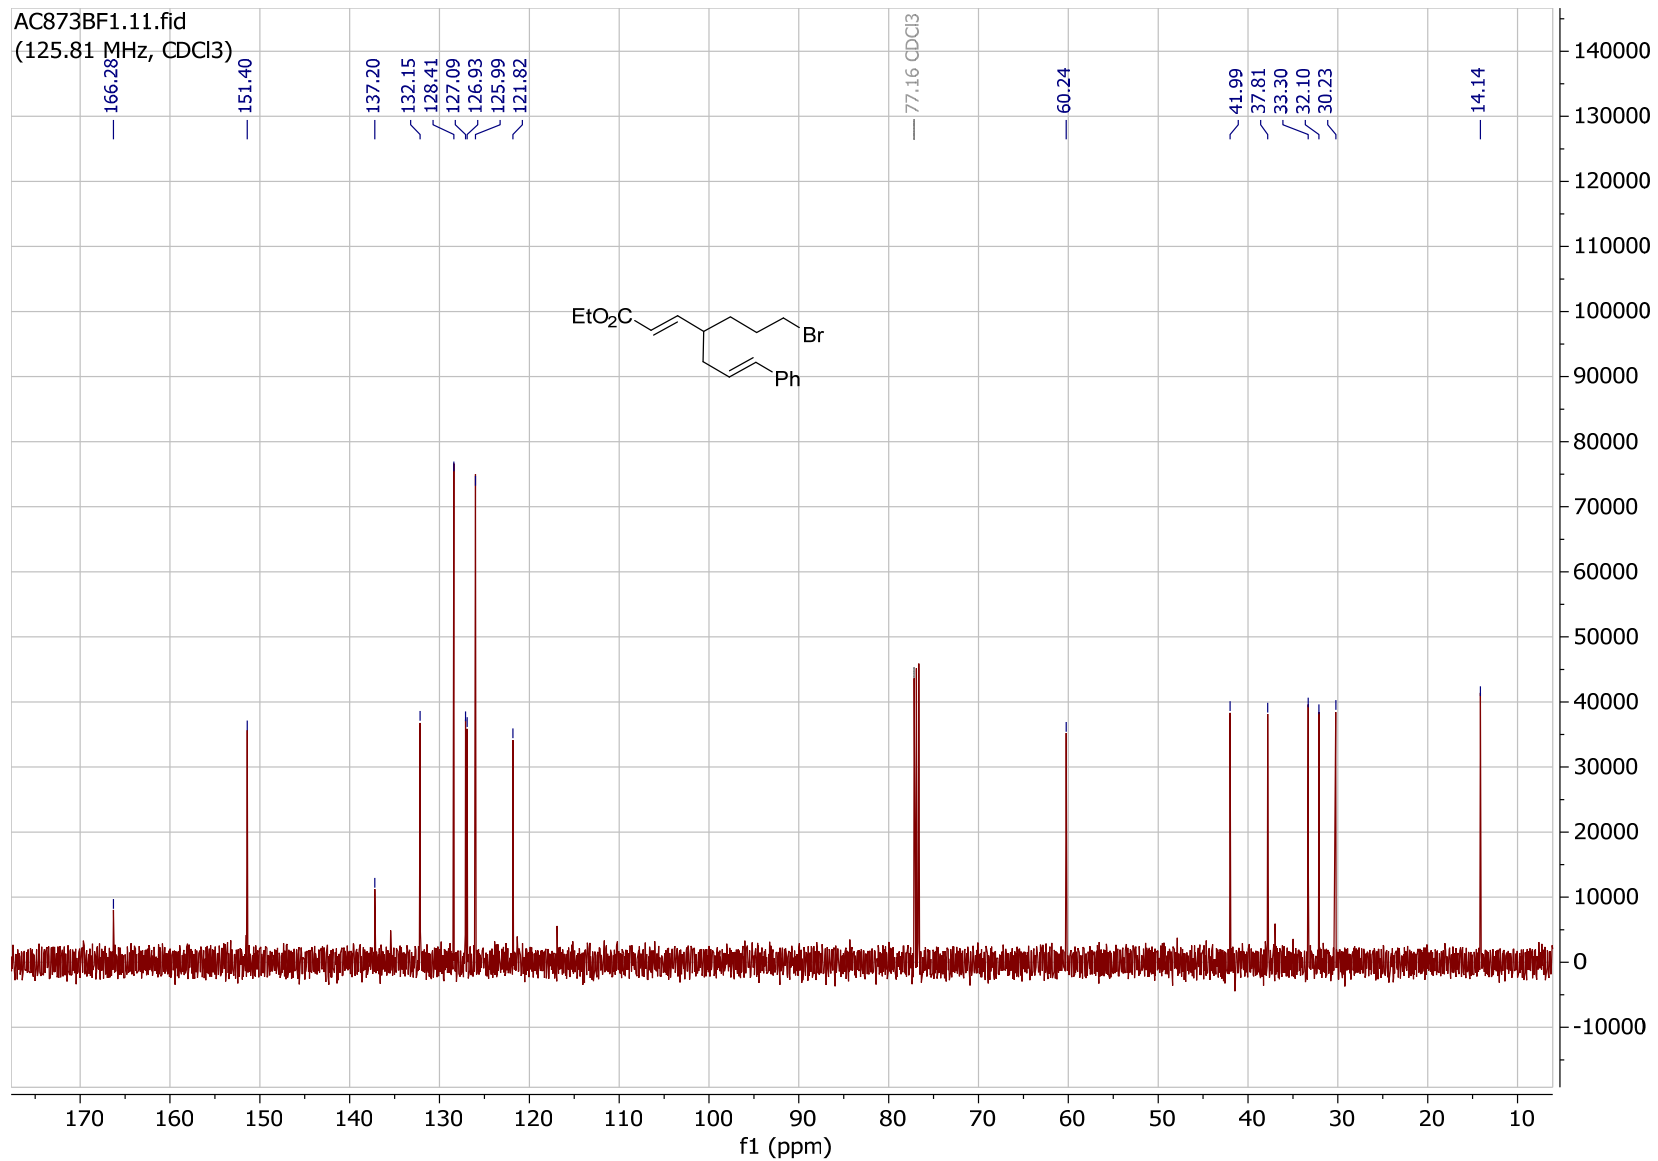



AC799.11.fid  
(125.81 MHz, CDCl<sub>3</sub>)

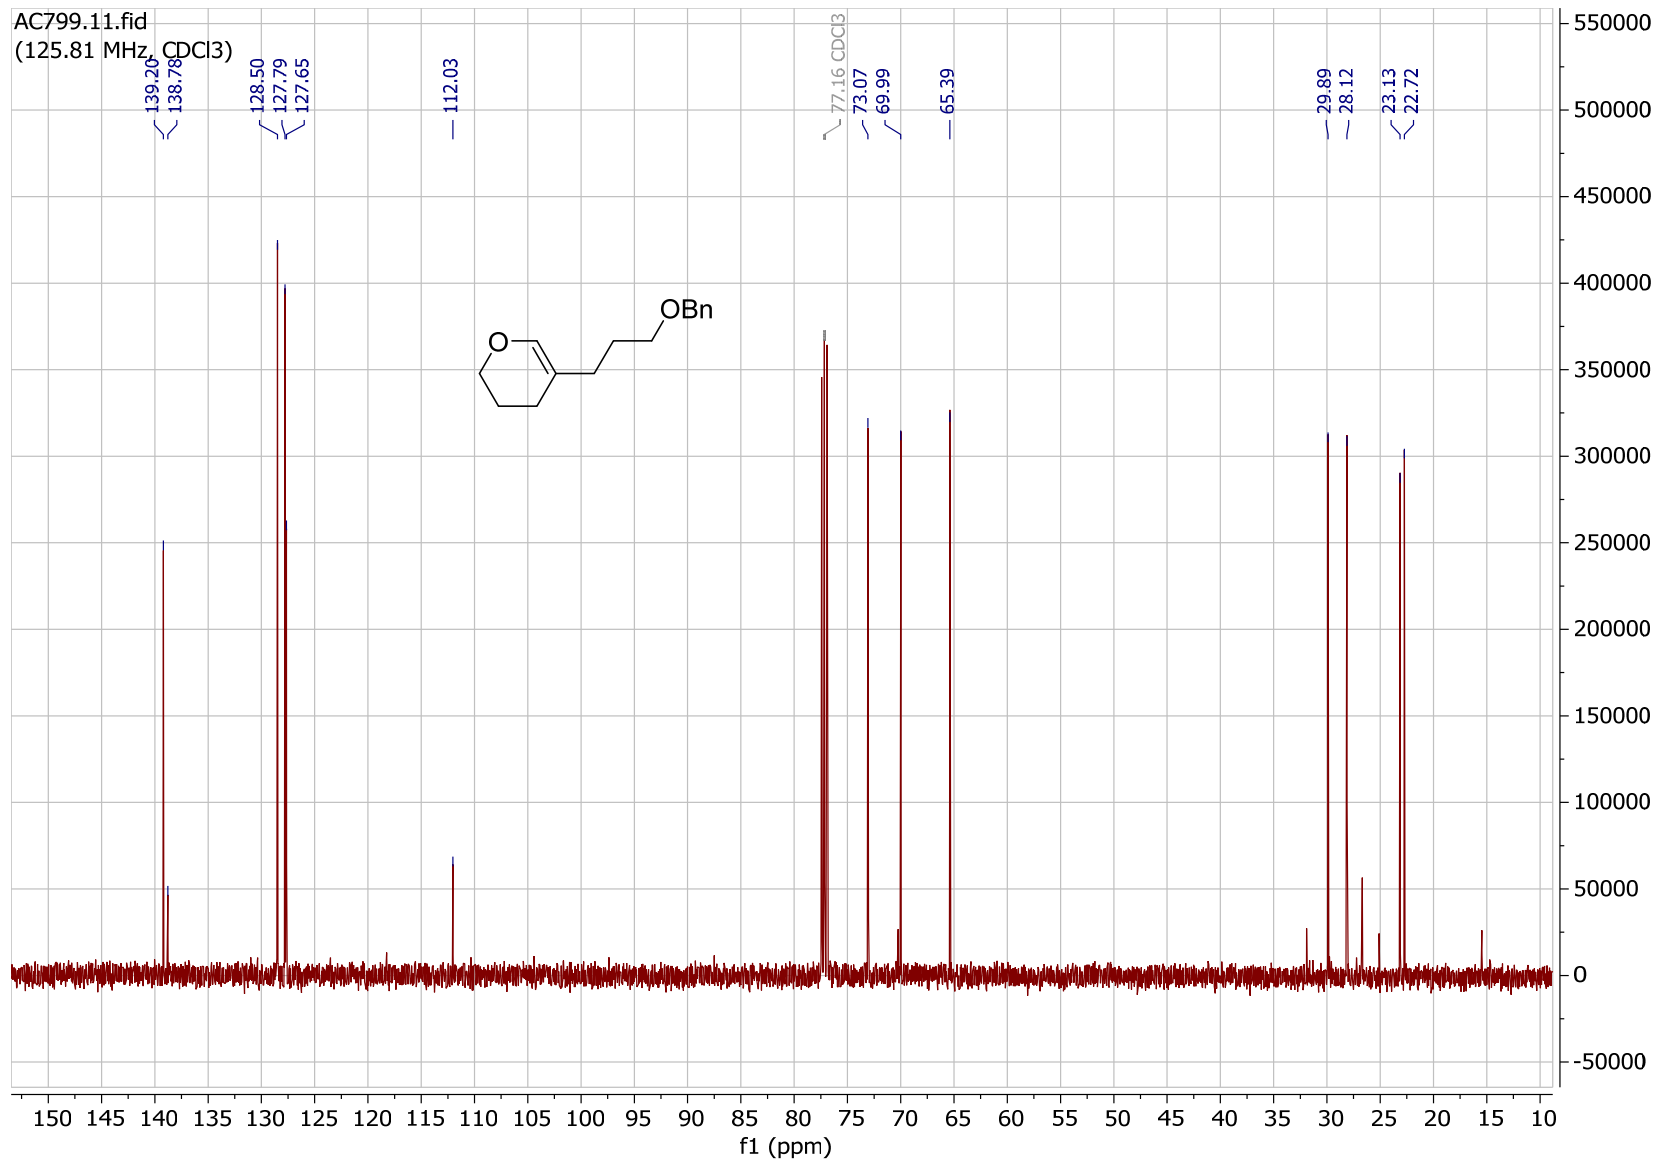

# 5-phenyl-3,4-dihydro-2H-pyran 4d

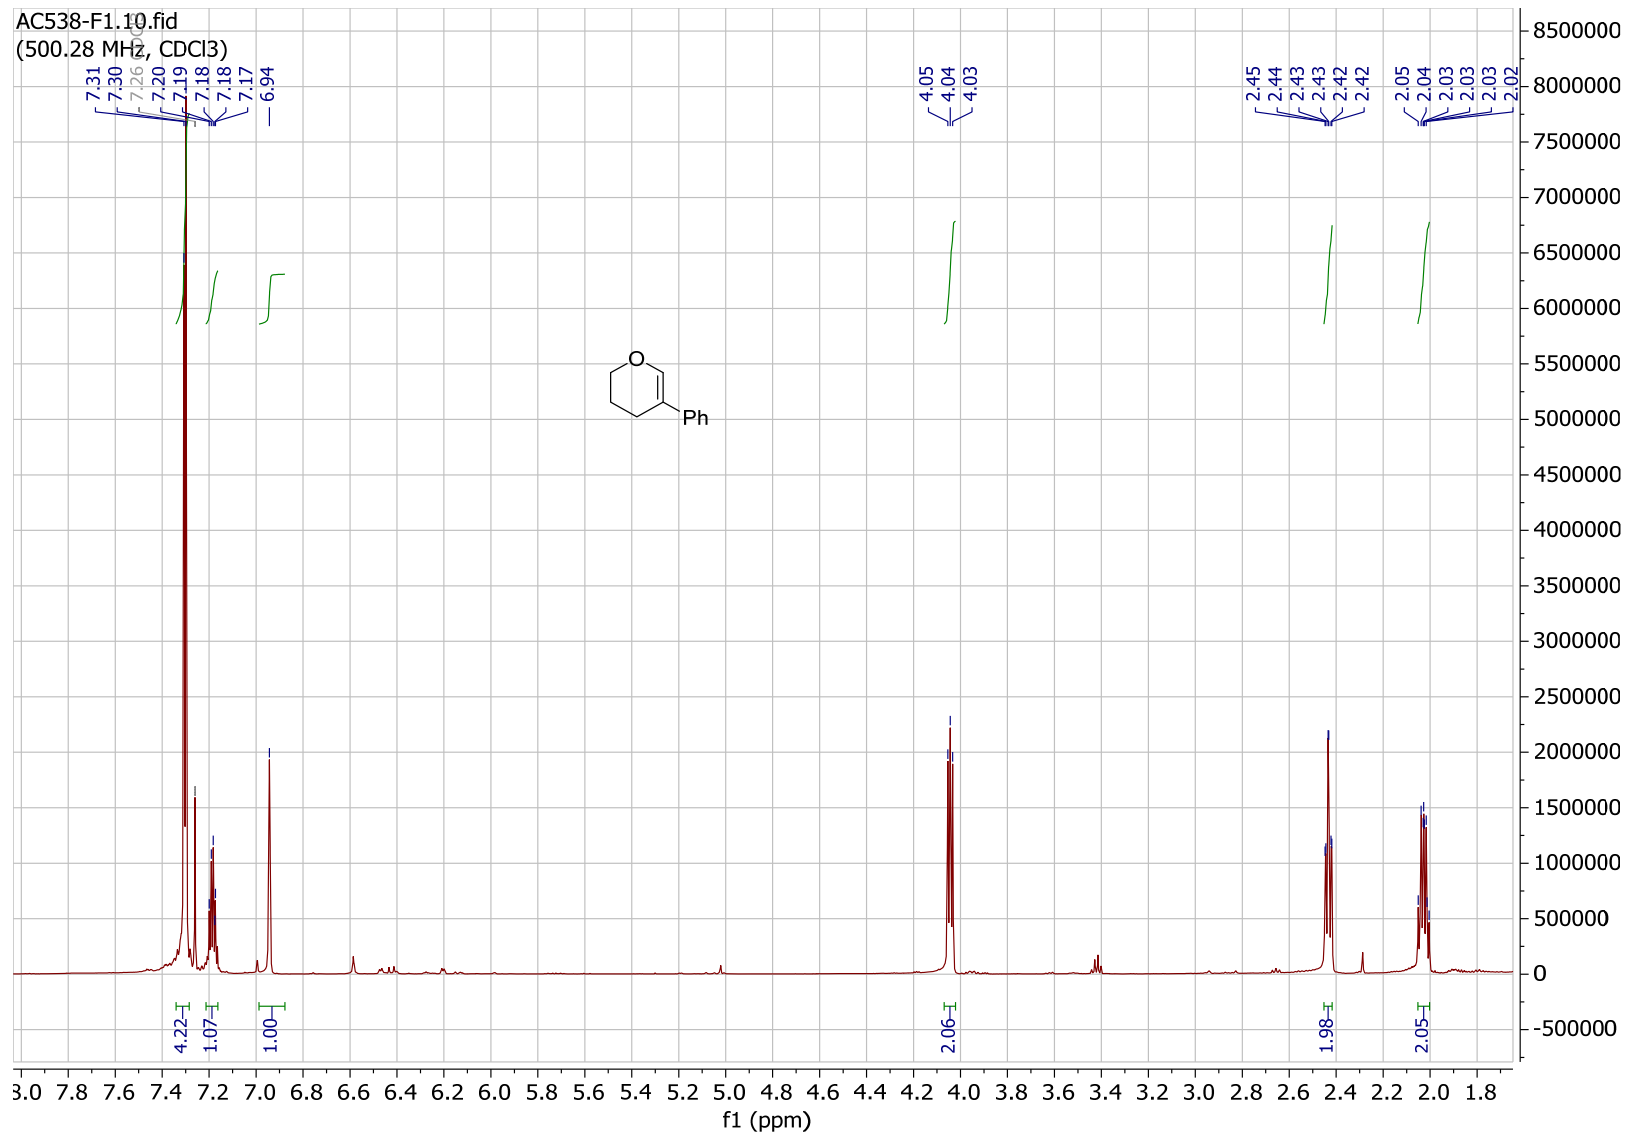

AC538-F1.12.fid  
(125.81 MHz, CDCl<sub>3</sub>)

142.26

139.76

128.54

125.94

124.20

113.07

77.16 CDCl<sub>3</sub>

65.70

22.59

22.46

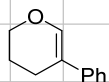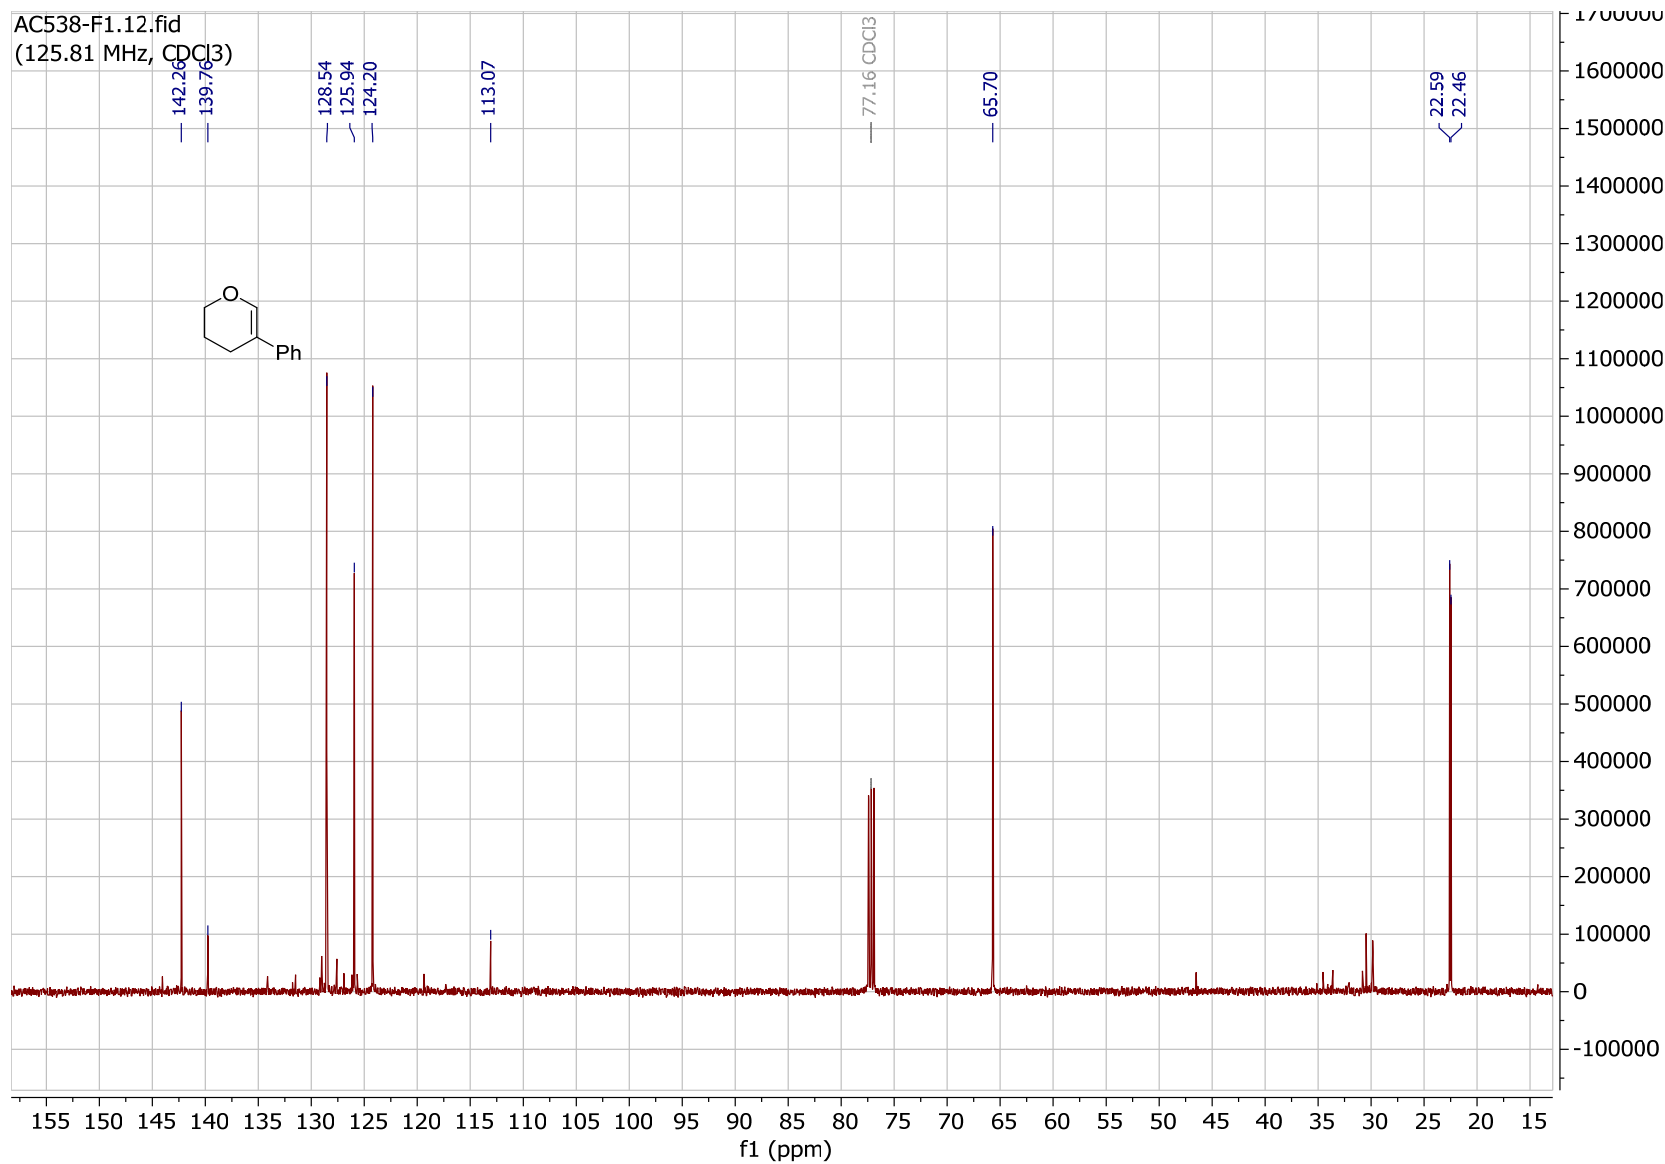

(1S,2S)-2-Phenylcyclopentane-1-carbaldehyde 5a

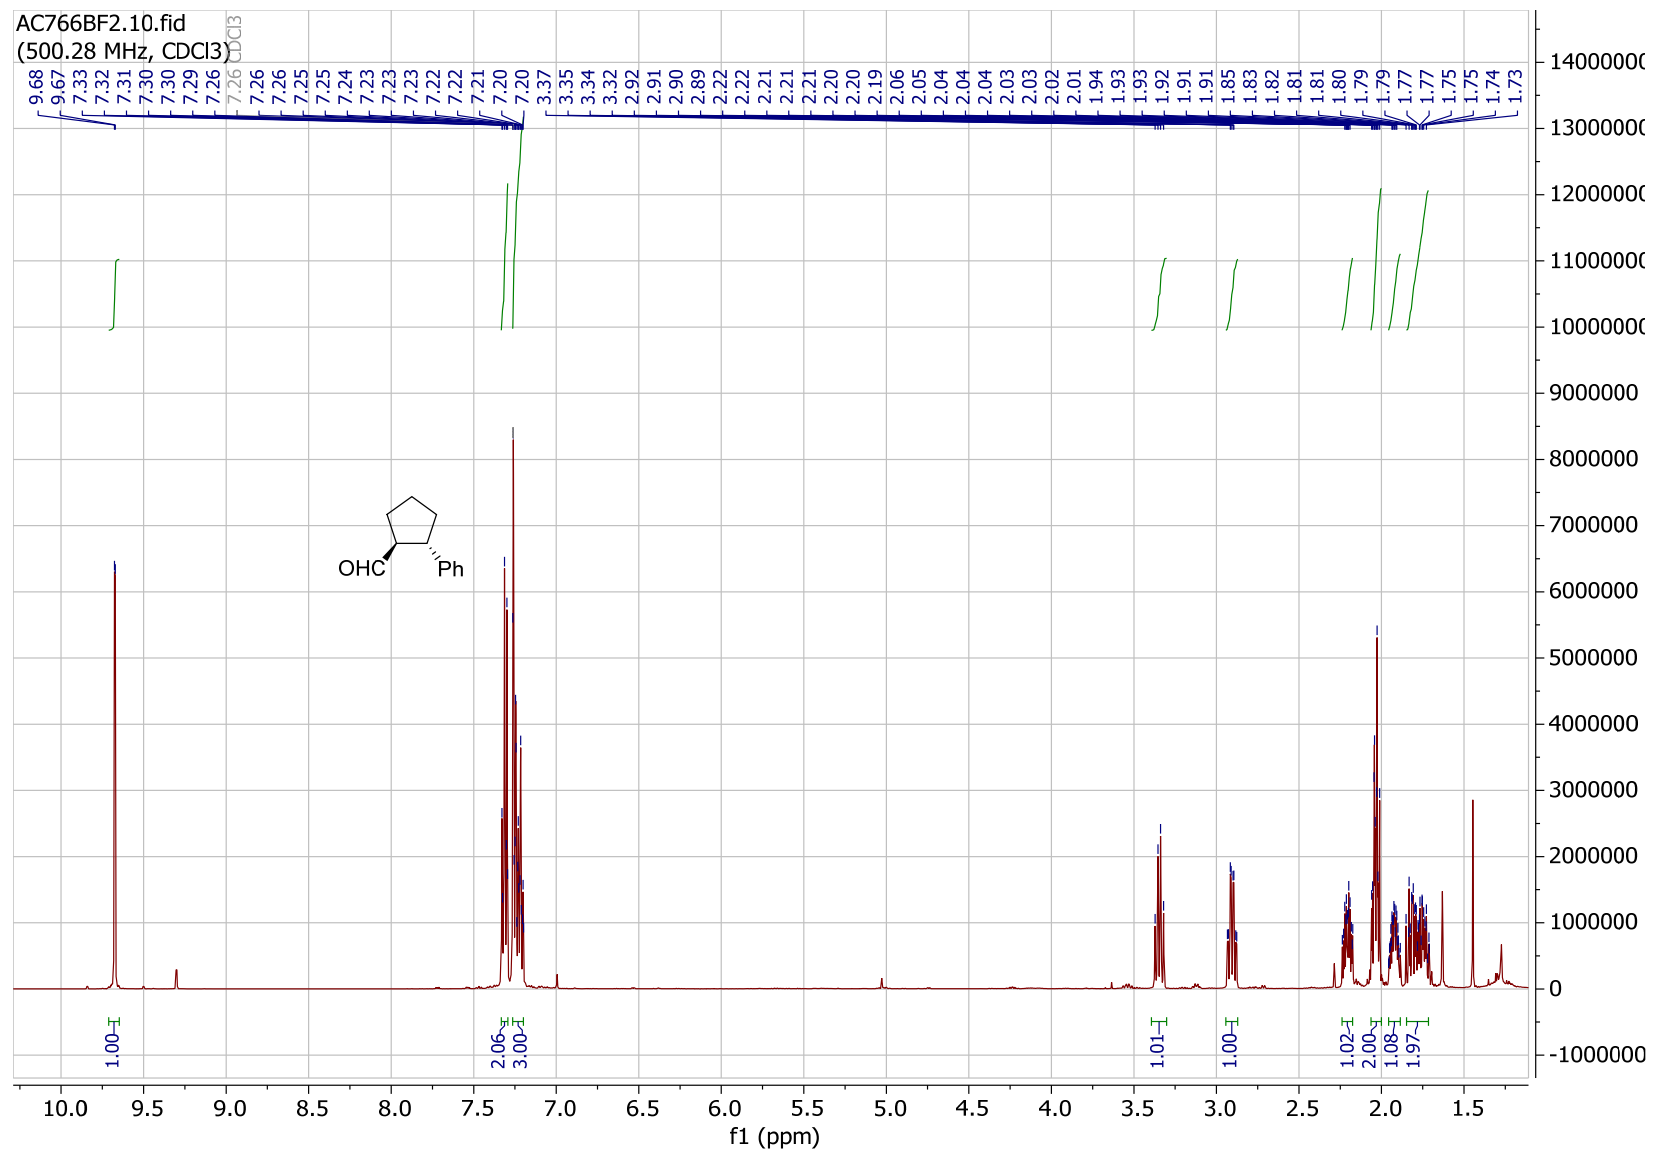



AC766BF2.12.fid  
(125.81 MHz, CDCl<sub>3</sub>)

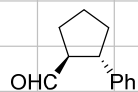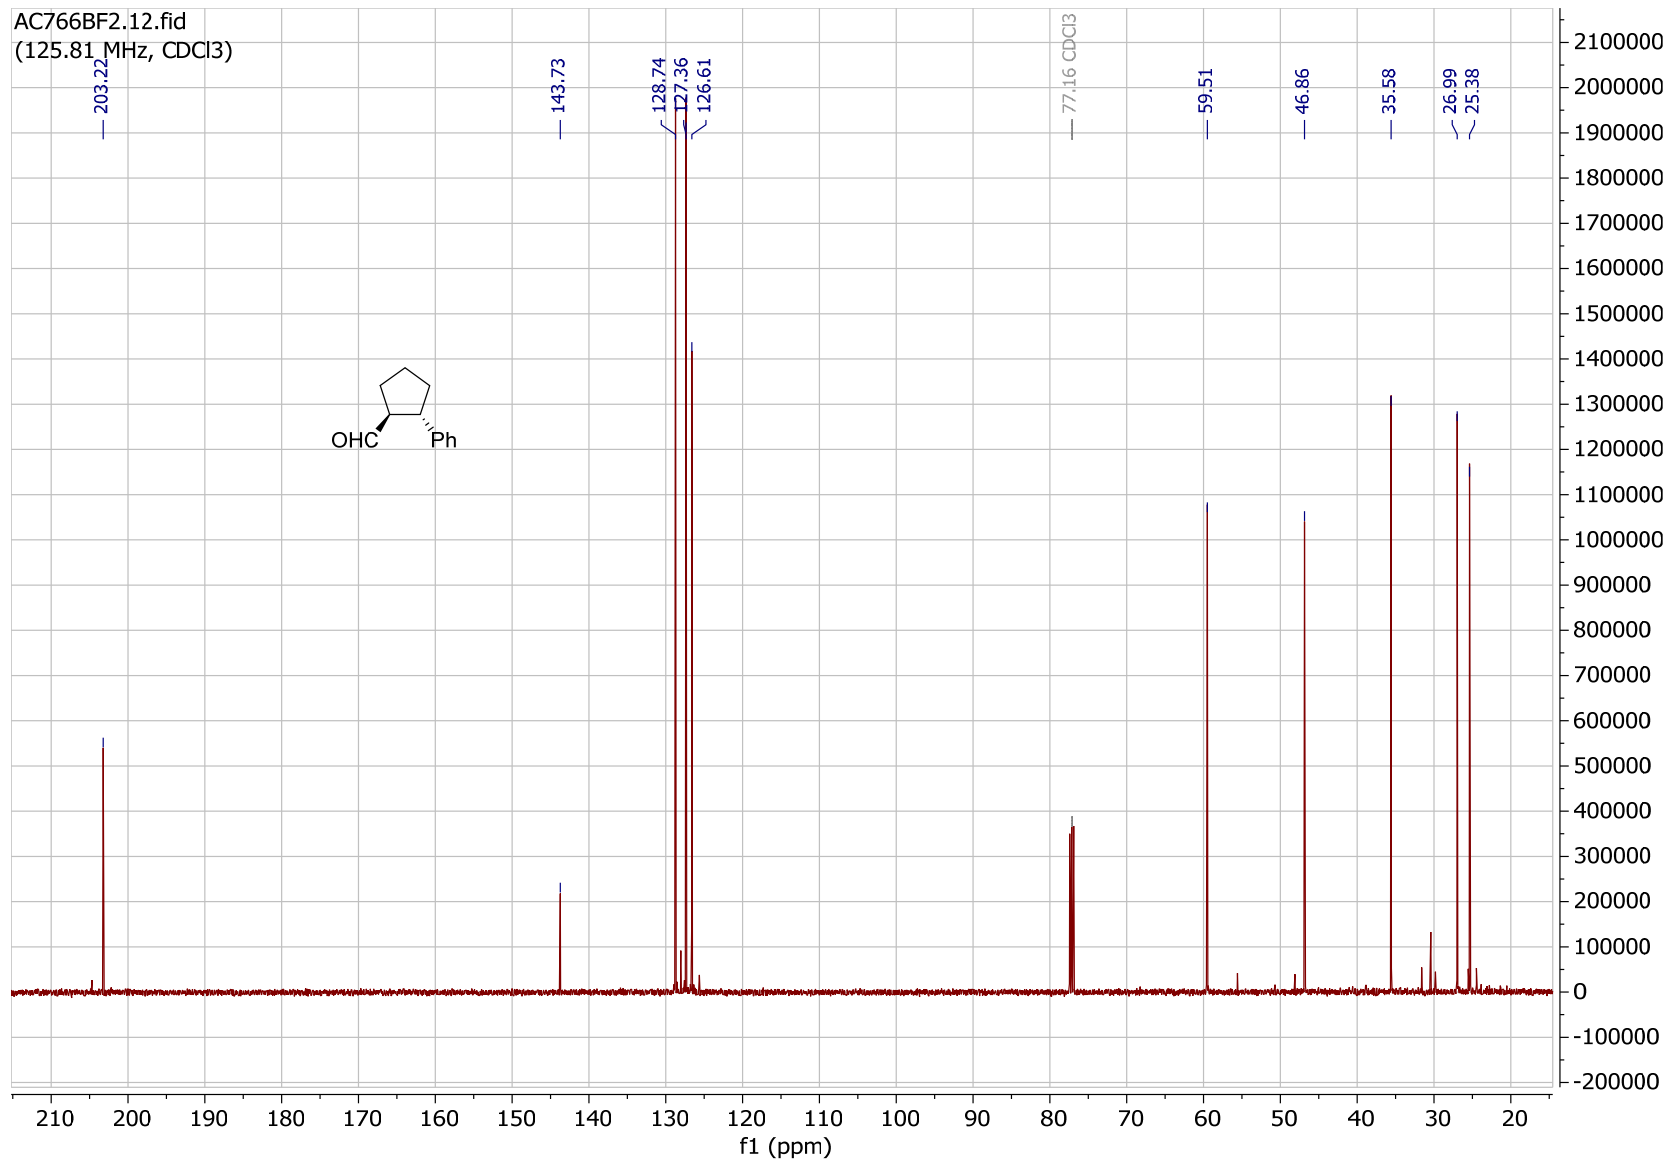

**(1*SR*,2*SR*)-2-(4-Methoxyphenyl)cyclopentane-1-carbaldehyde 5b**

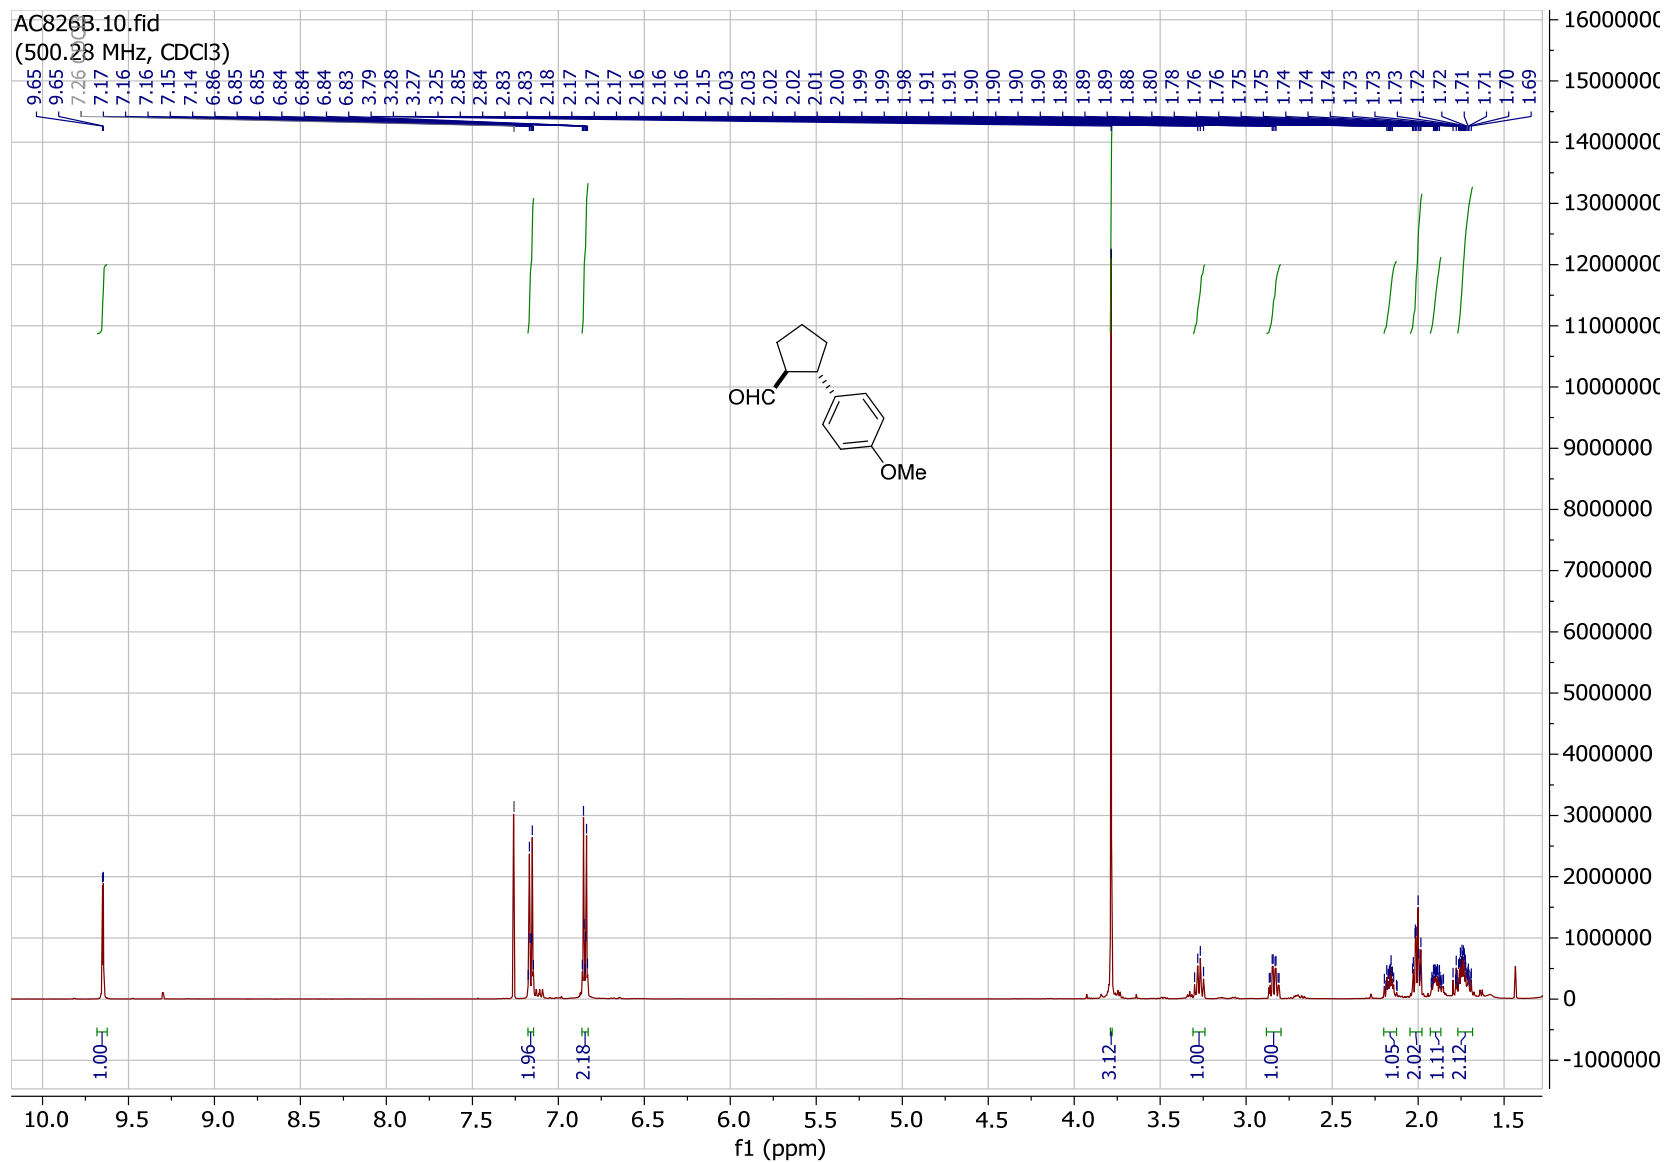

AC826B.12.fid  
(125.81 MHz, CDCl<sub>3</sub>)

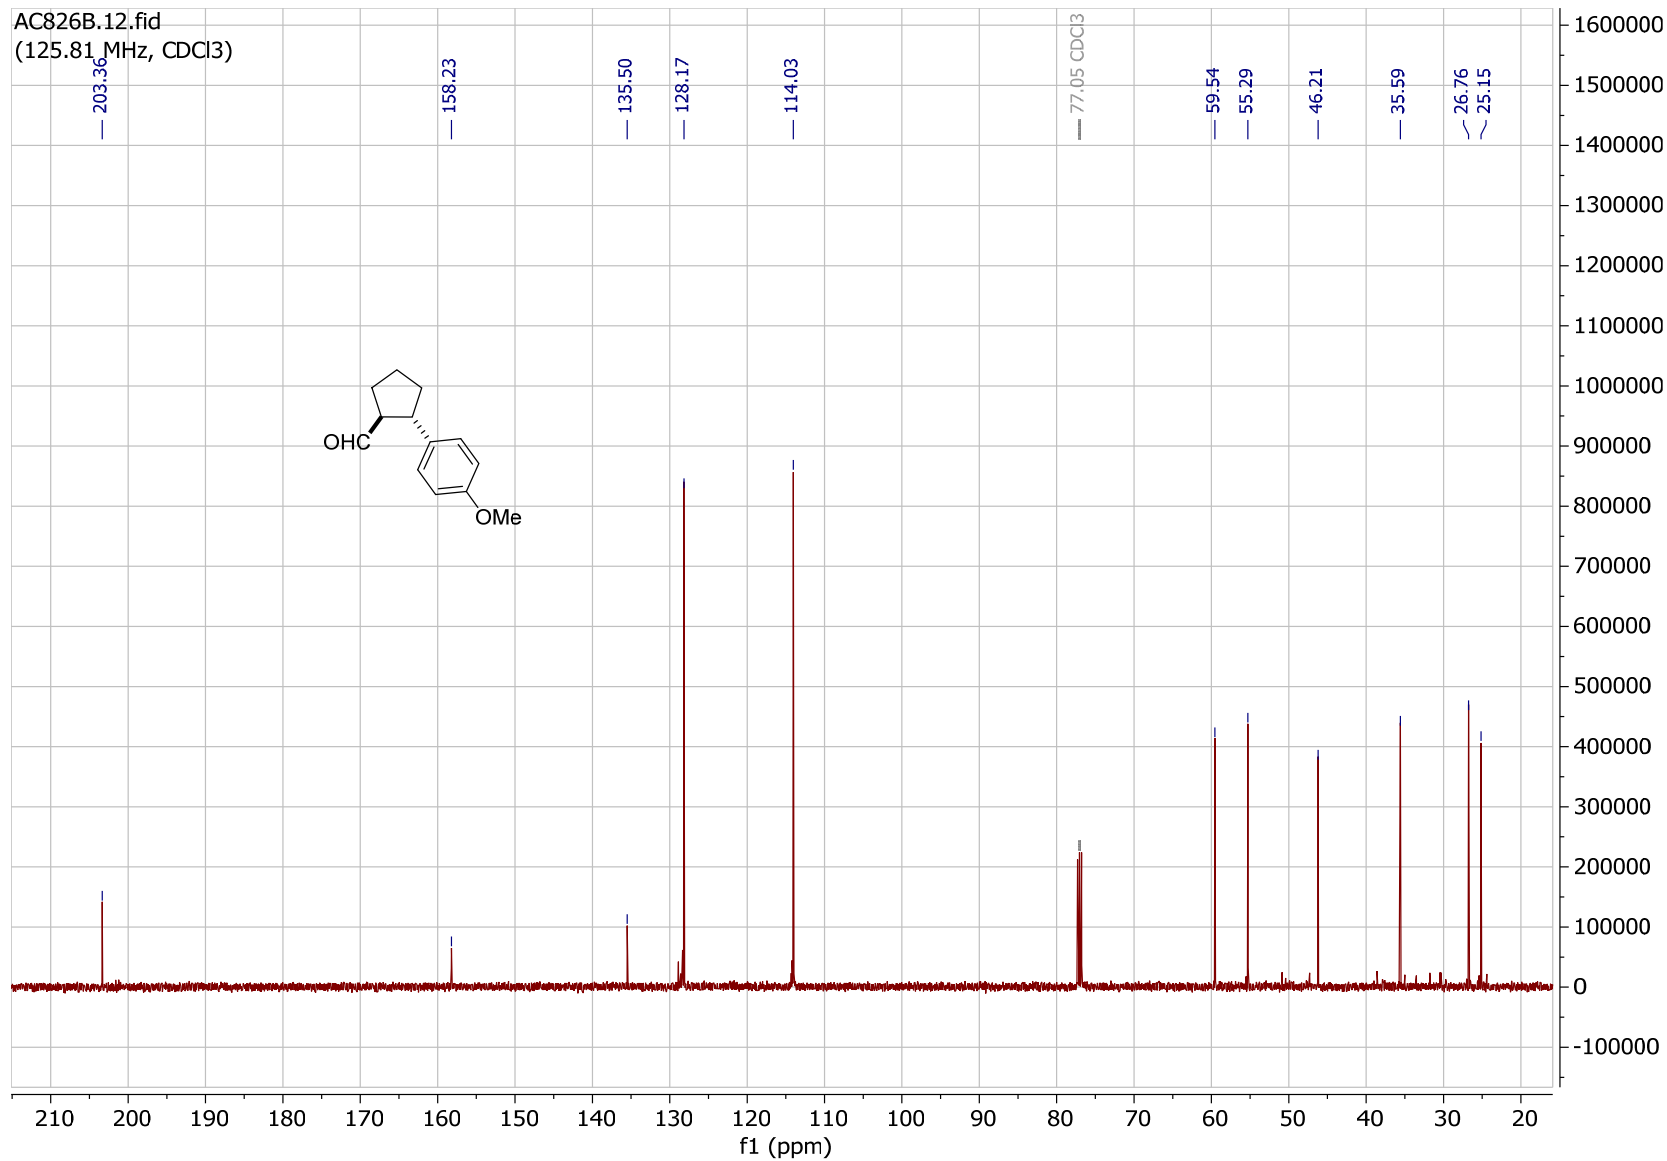

(1*S*,2*S*)-2-[4-(Trifluoromethyl)phenyl]cyclopentane-1-carbaldehyde 5c

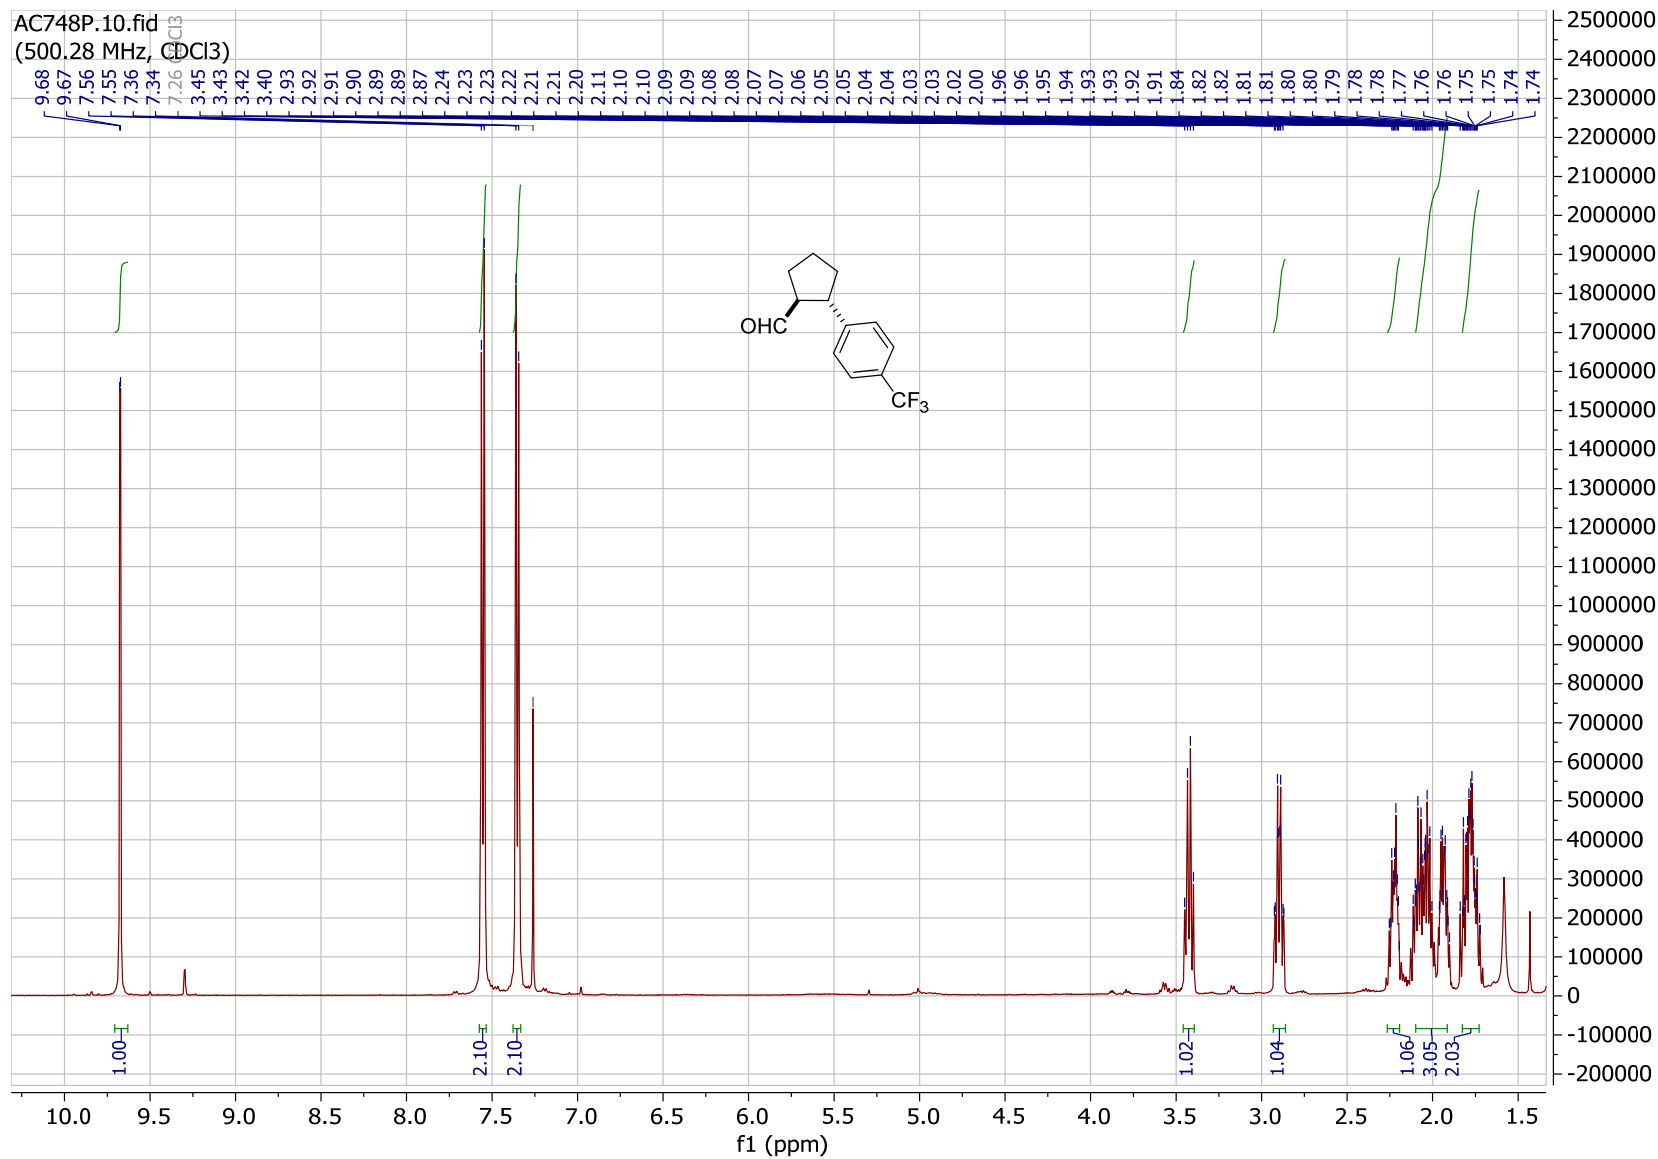

AC748P.12.fid  
(125.81 MHz, CDCl<sub>3</sub>)

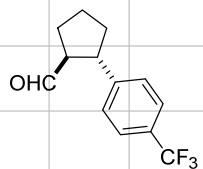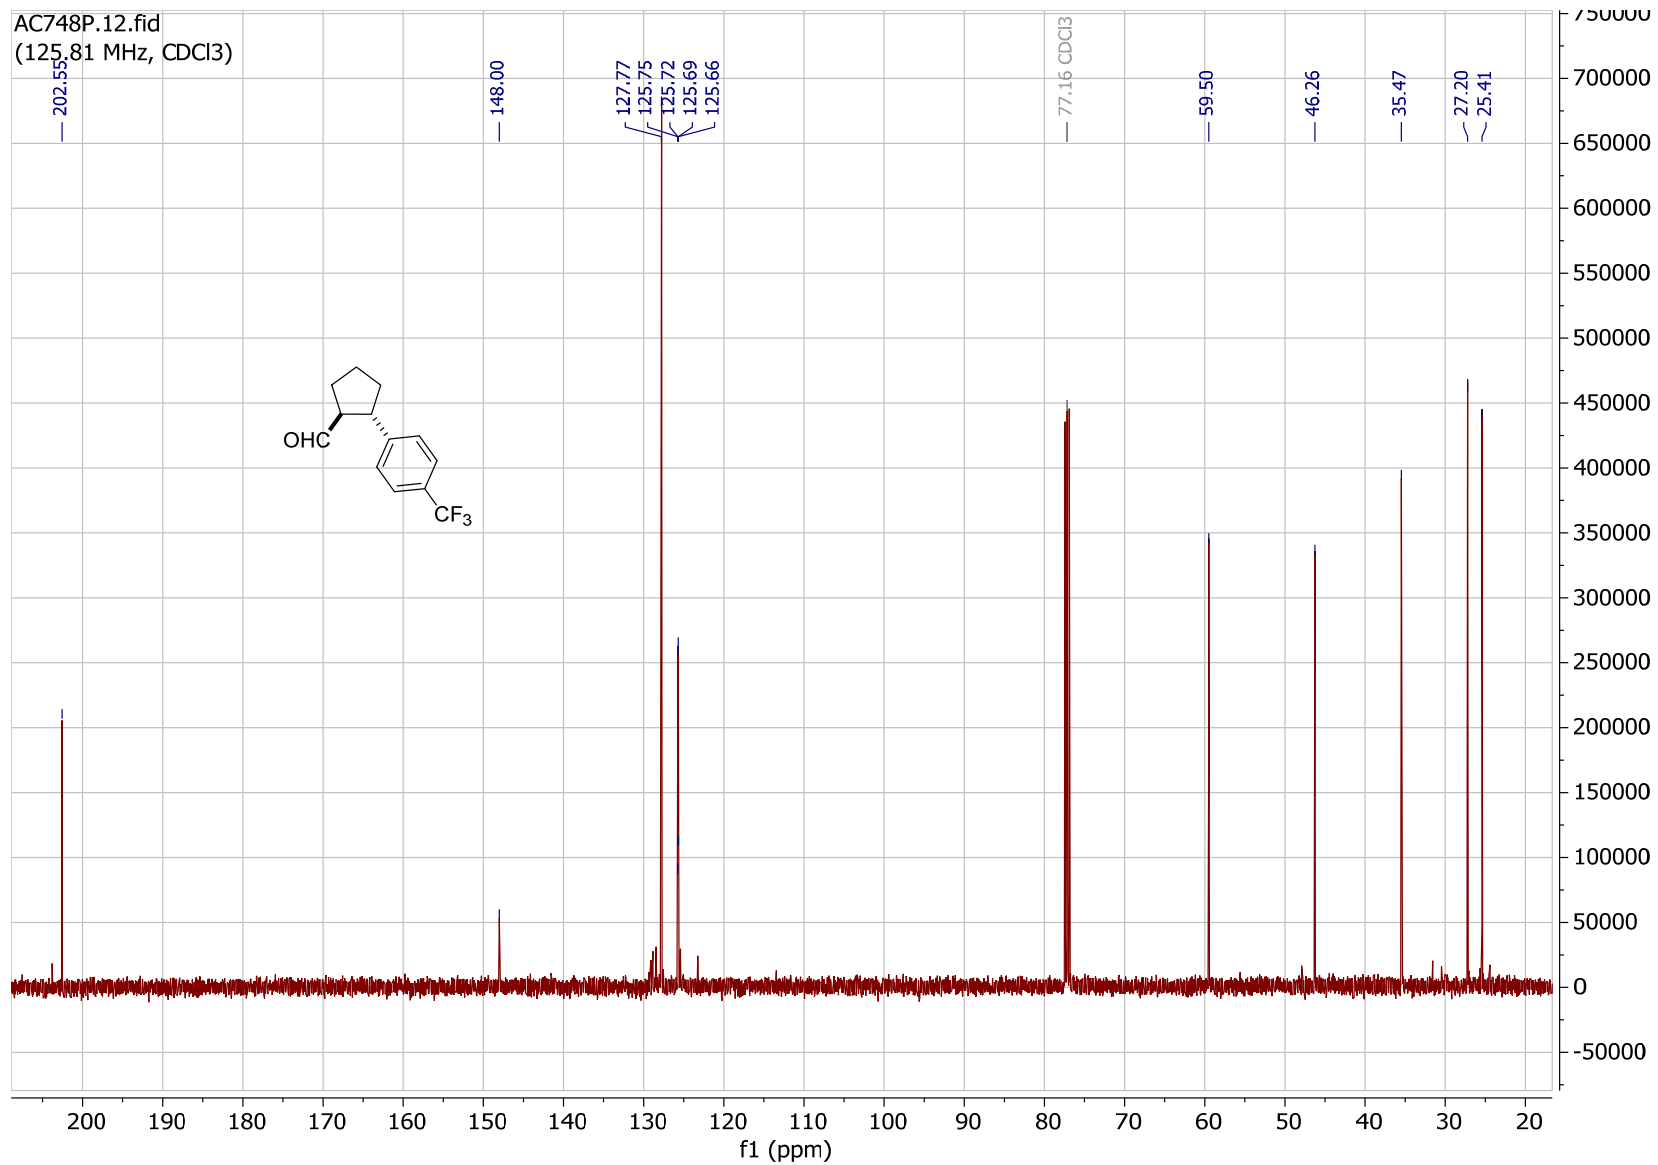

AC748P.13.fid  
(470.70 MHz, CDCl<sub>3</sub>)

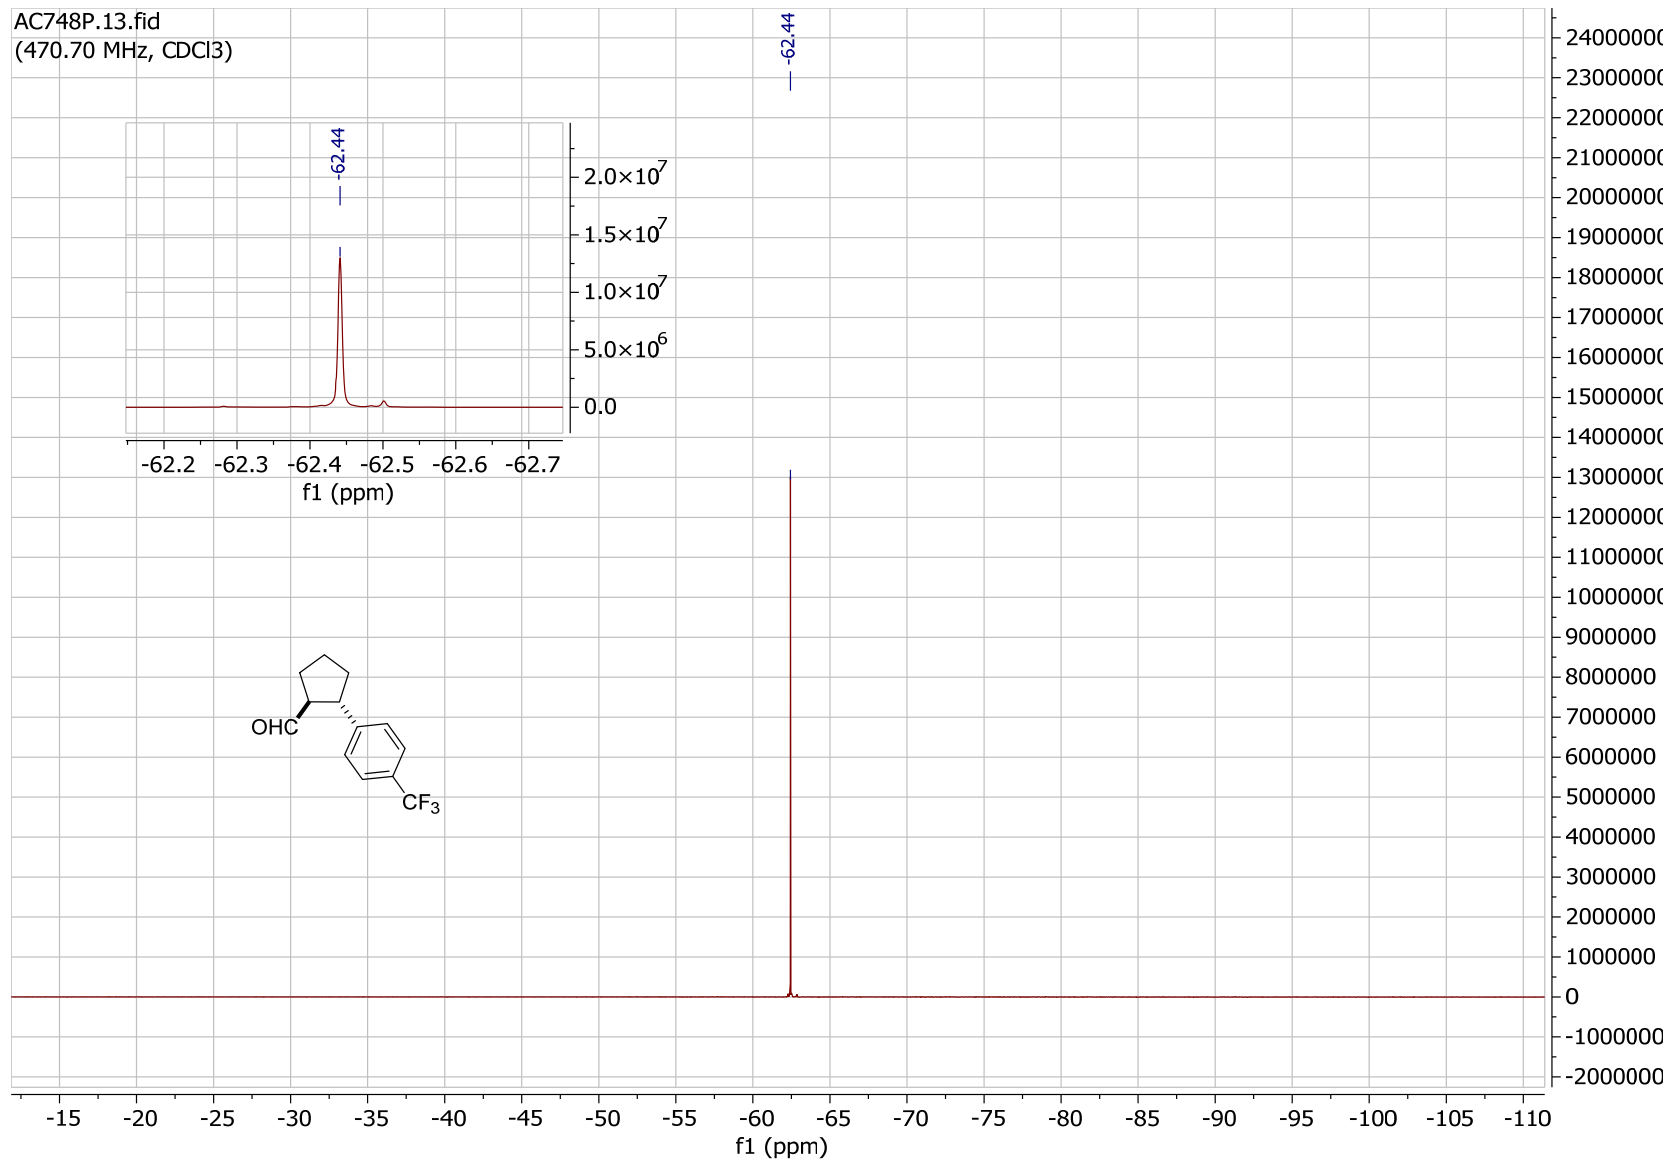

# 2-(Furan-2-yl)cyclopentane-1-carbaldehyde 5d

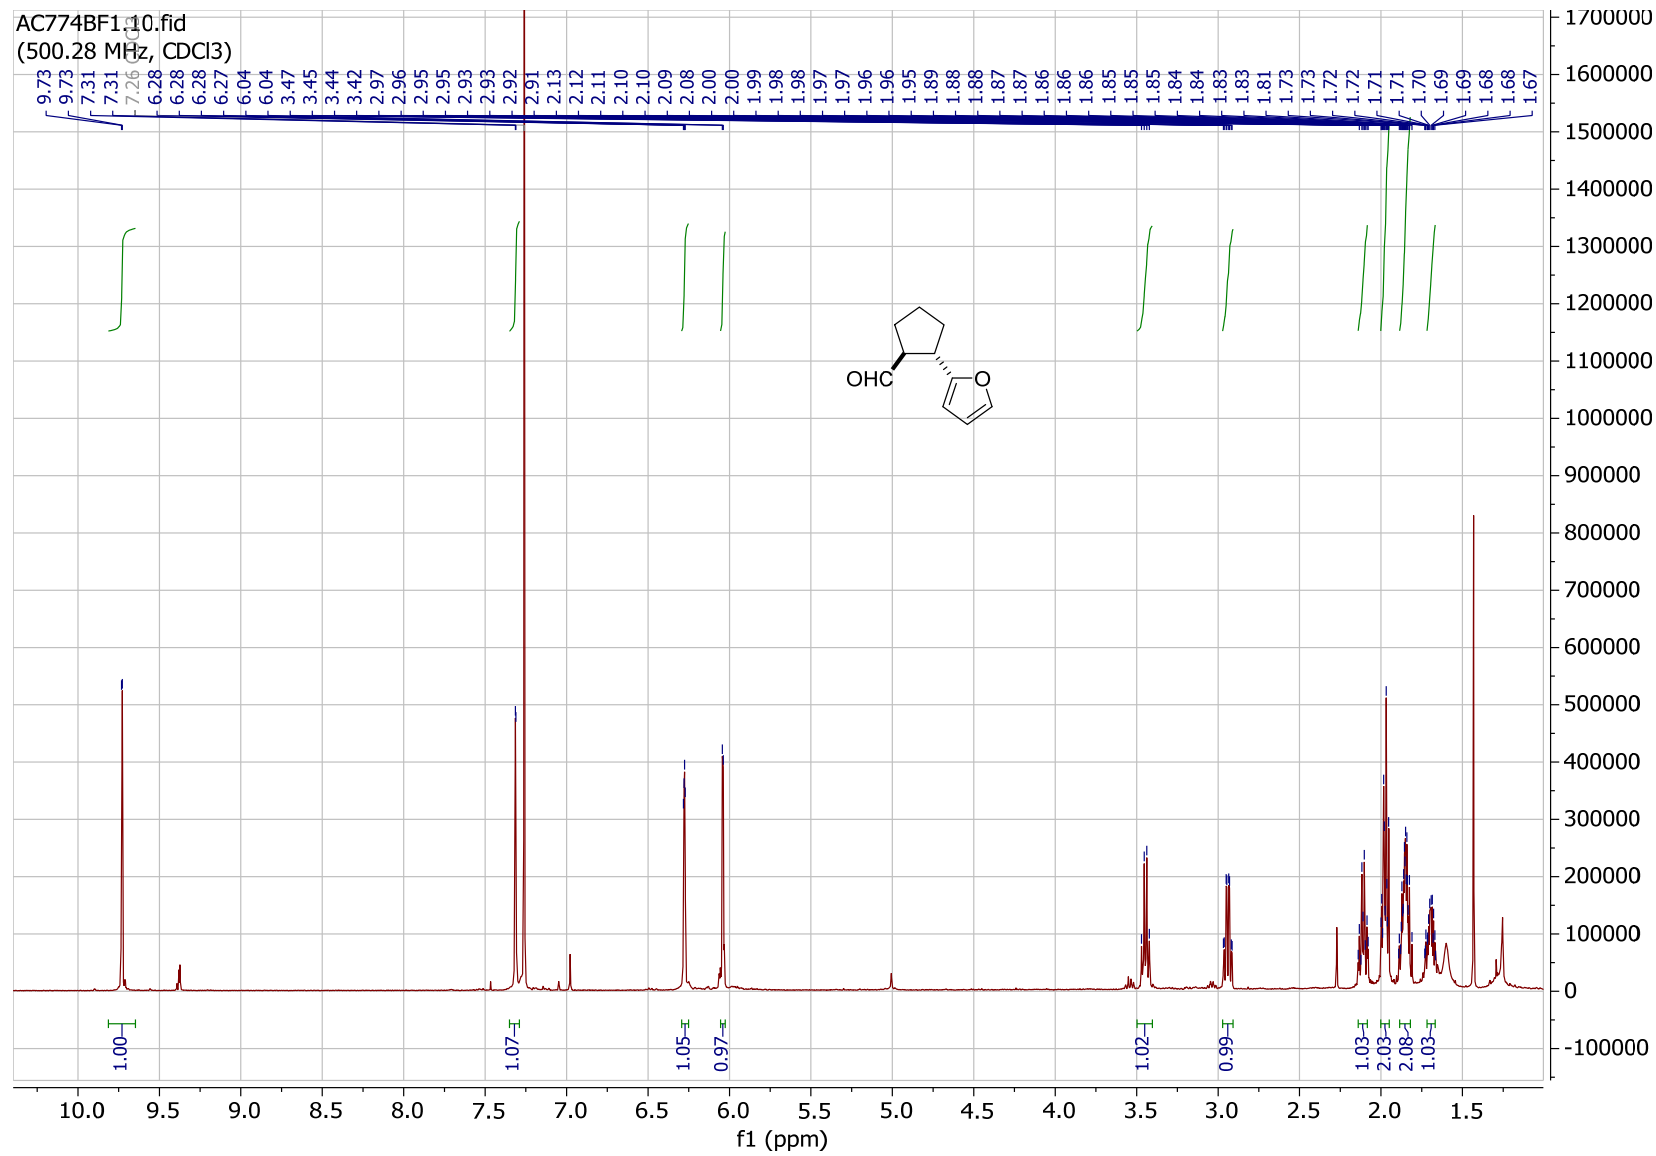

AC774BF1.12.fid  
(125.81 MHz, CDCl<sub>3</sub>)

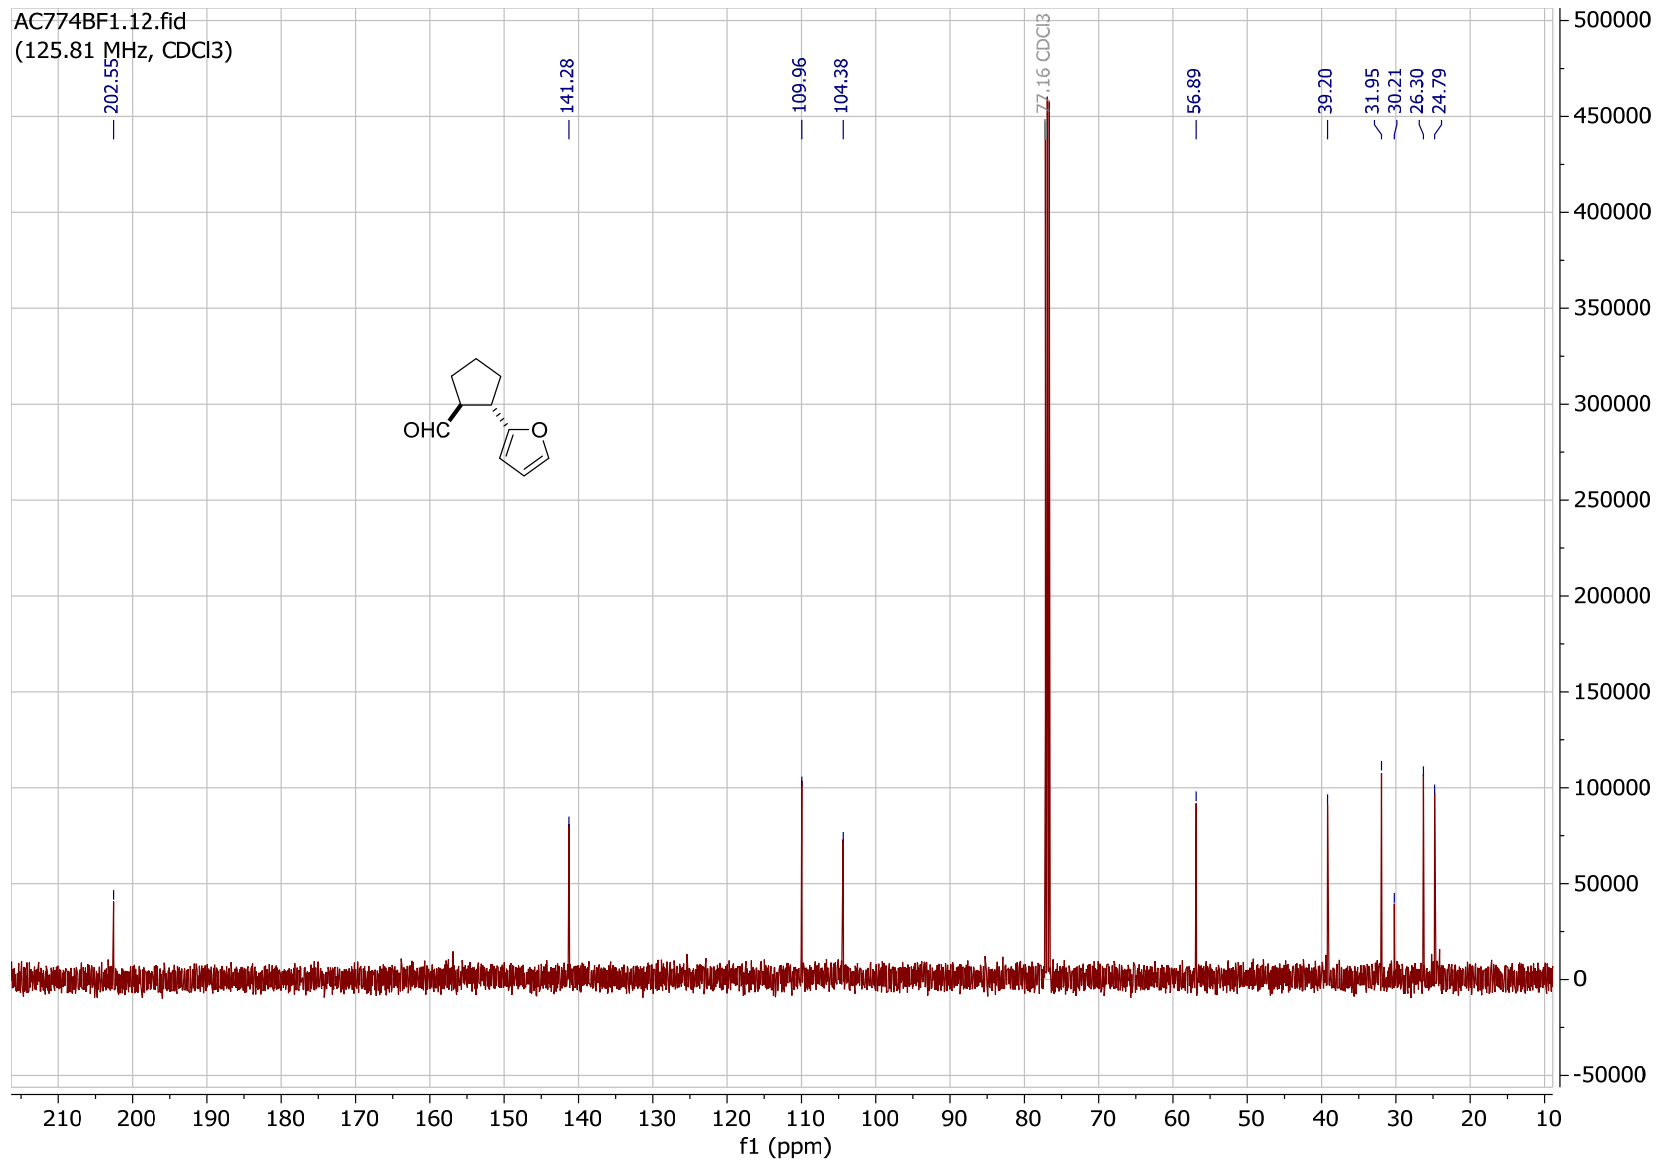



# 2-isopropylcyclopentane-1-carbaldehyde 5e

AC827BF1.10.fid  
(500.28 MHz, CDCl<sub>3</sub>)

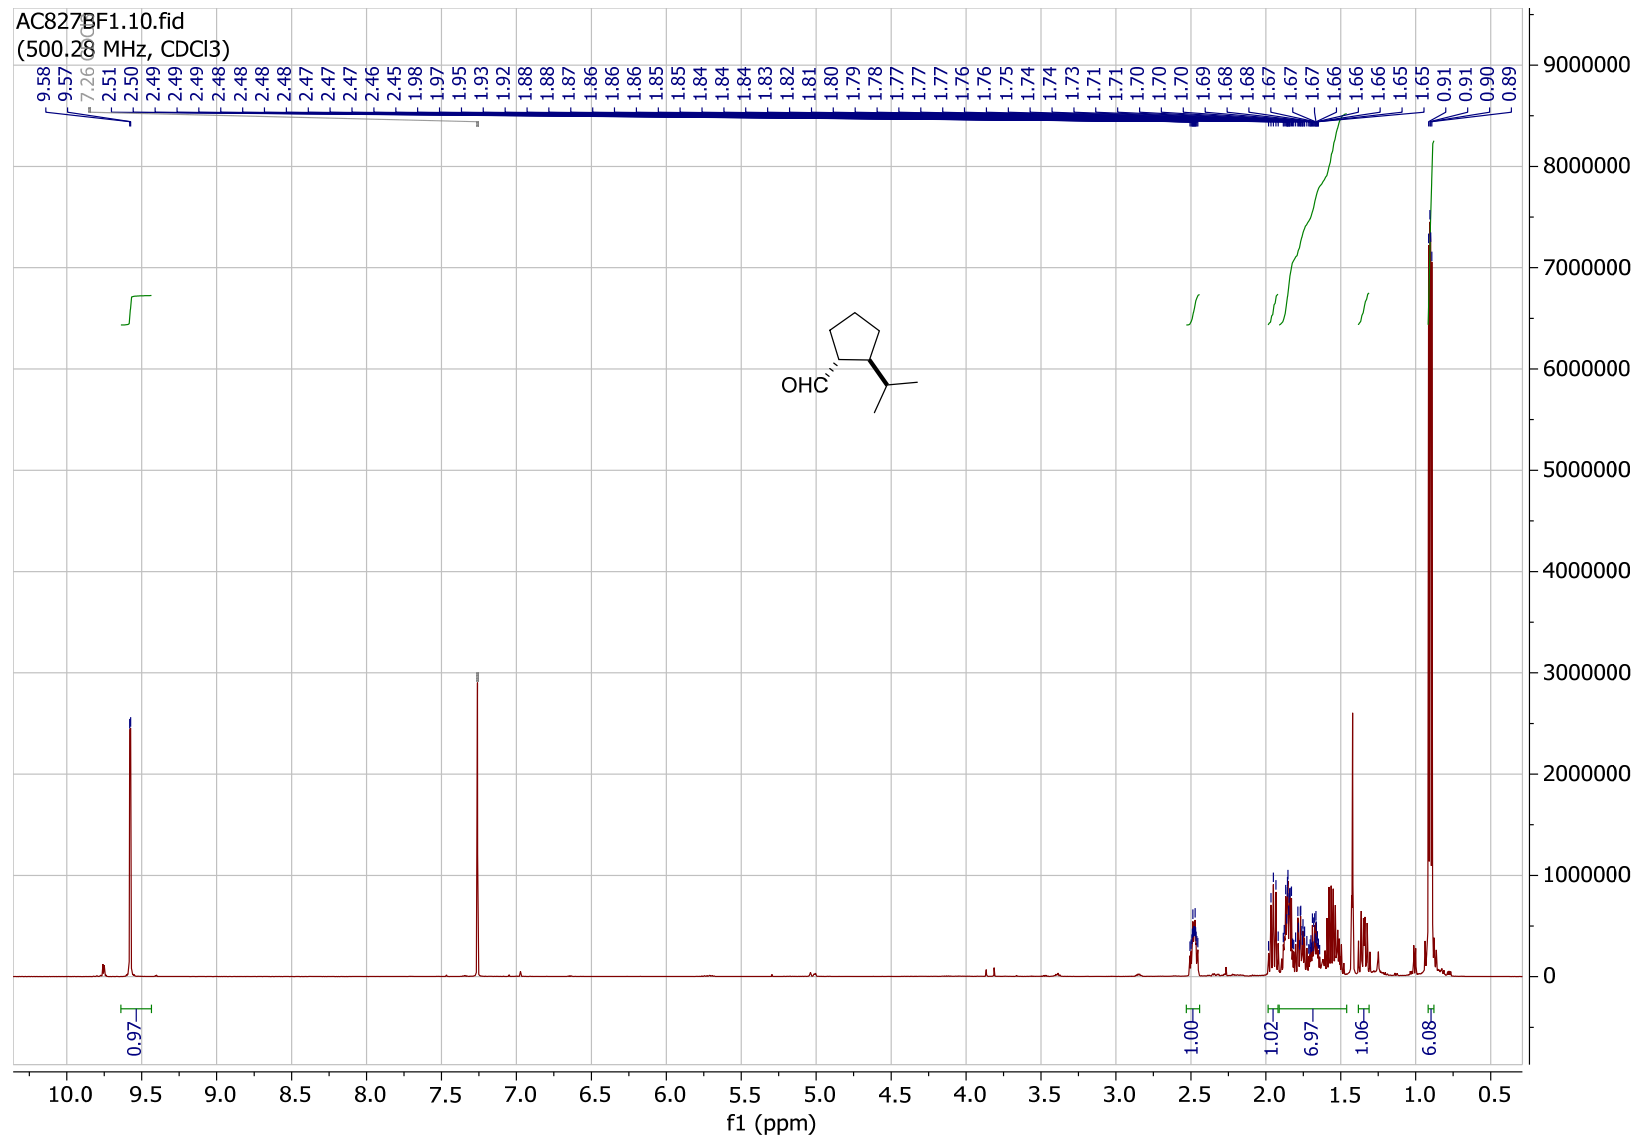

AC827BF1.11.fid  
(125.81 MHz, CDCl3)

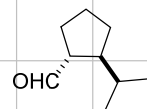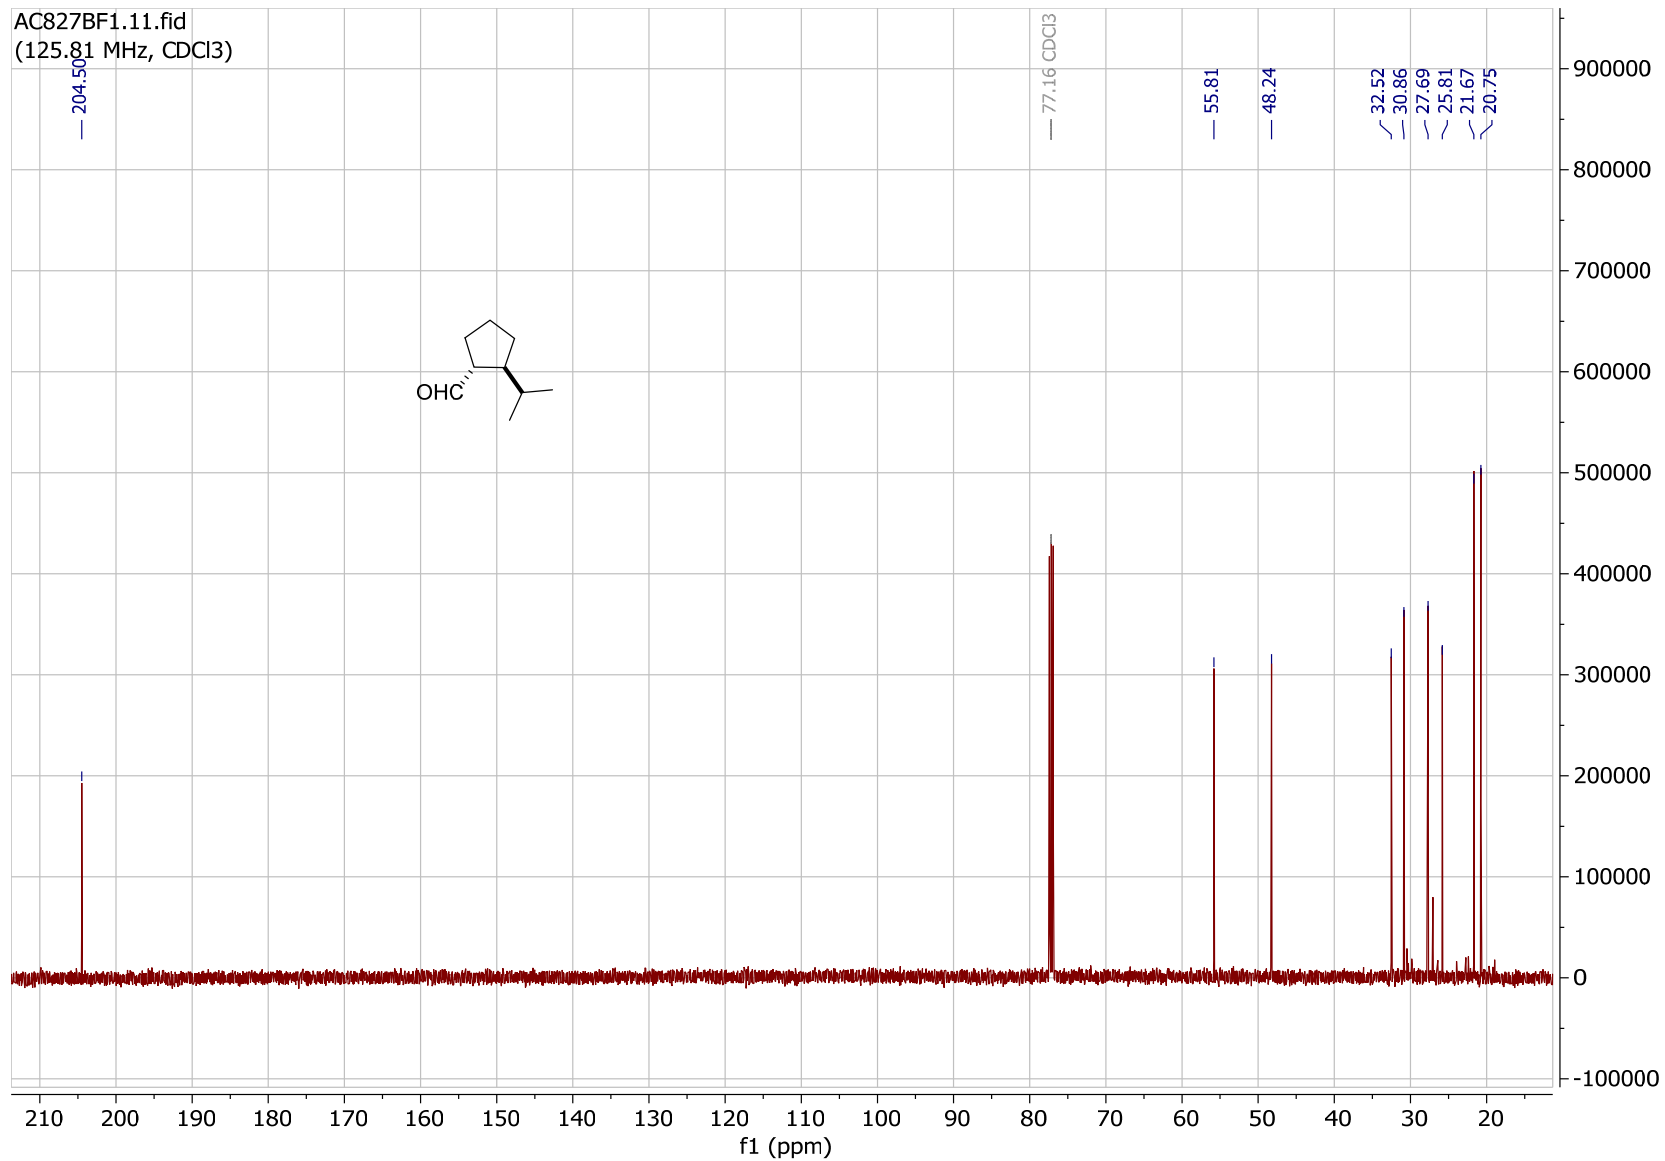

(1*SR*,2*RS*)-2-Phenethylcyclopentanecarbaldehyde 5f

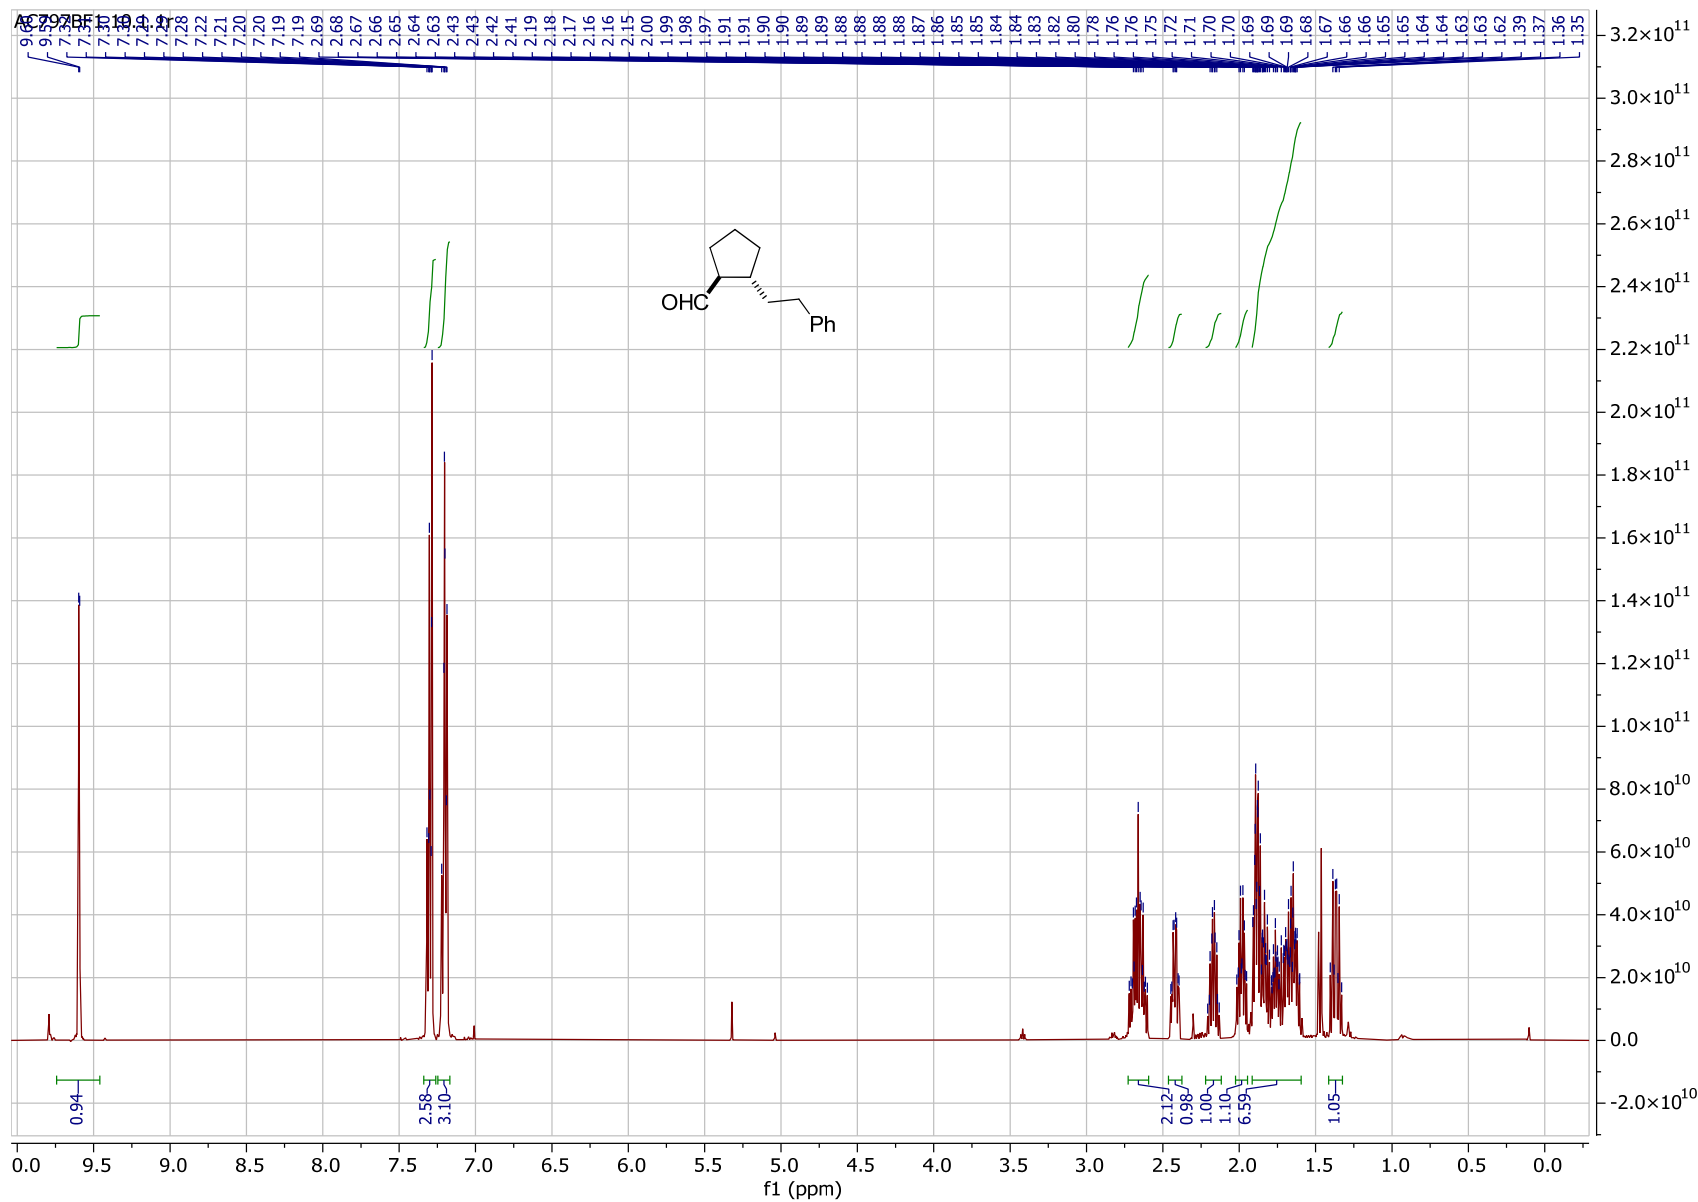

AC797BF1.12.1.1r

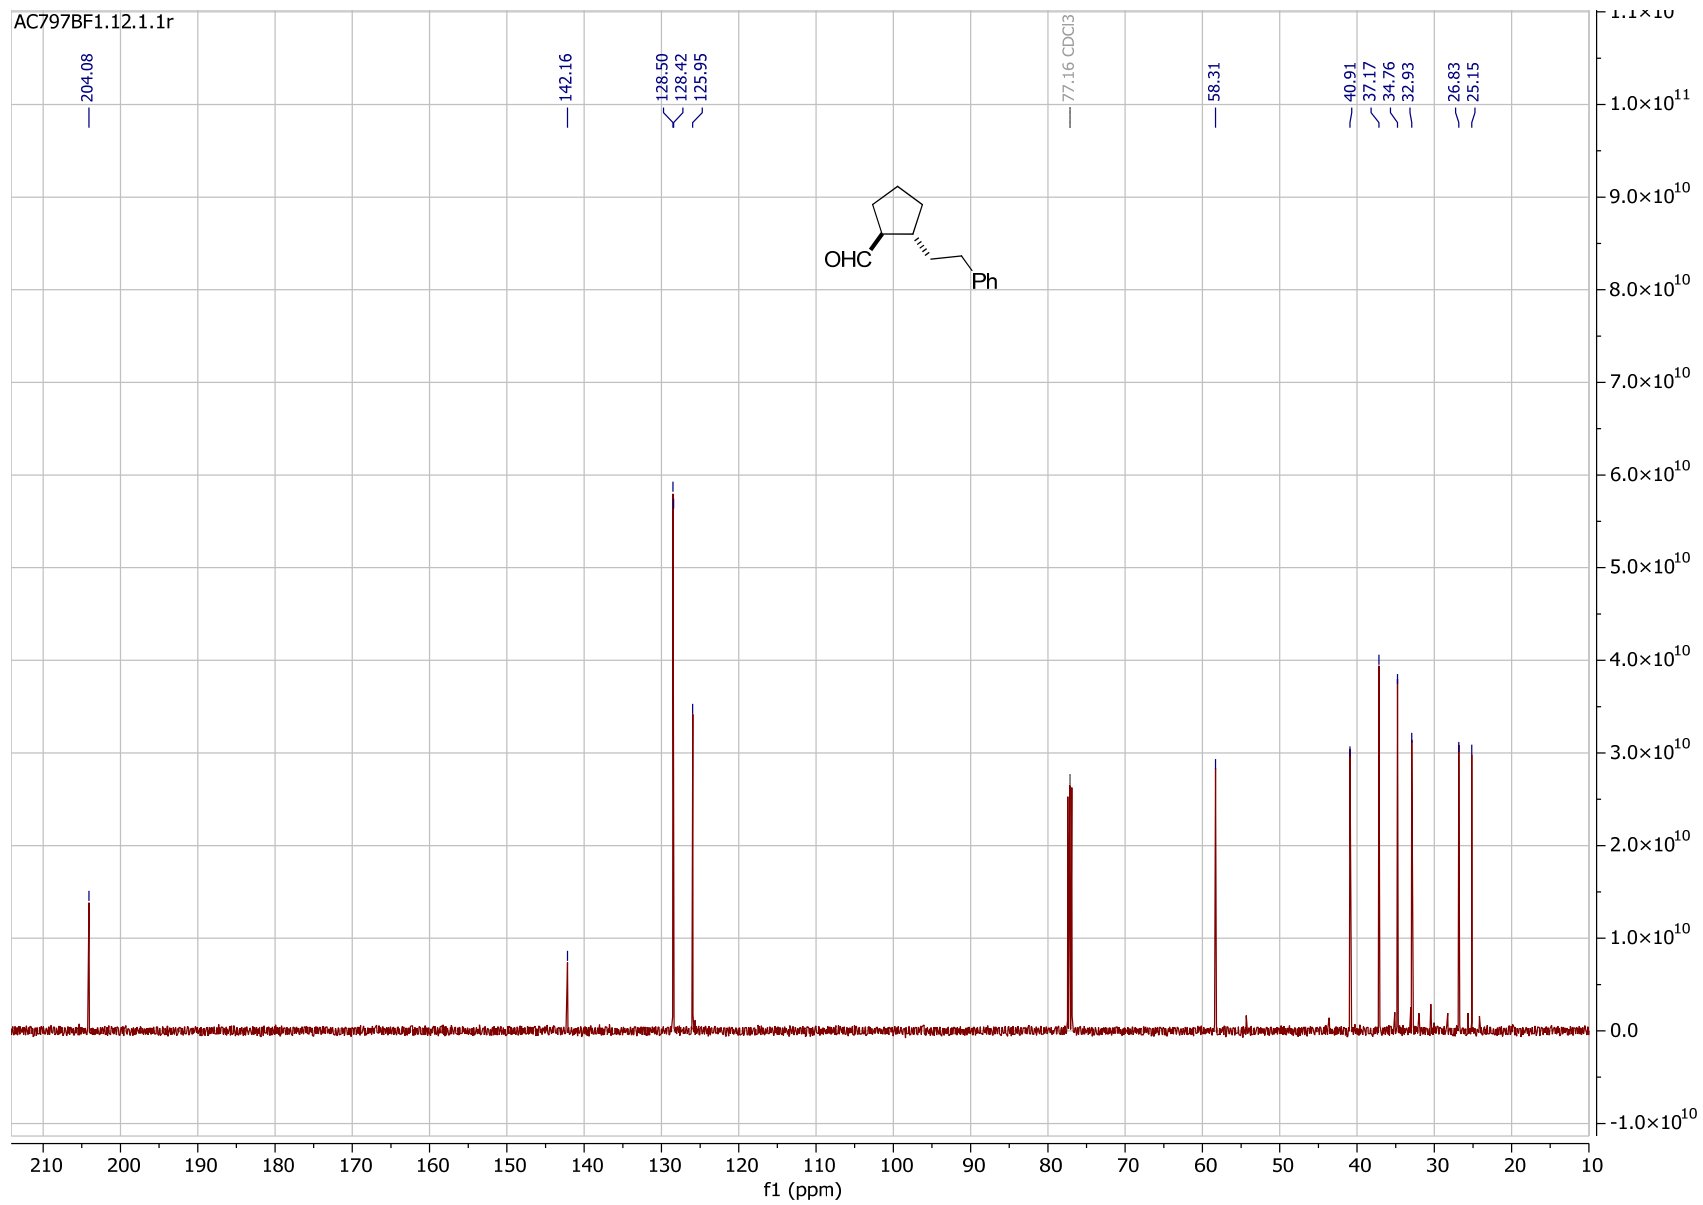

(1*SR*,2*SR*)-2-[(*E*)-2-Methyl-5-phenylpent-4-en-2-yl]cyclopentane-1-carbaldehyde 5g

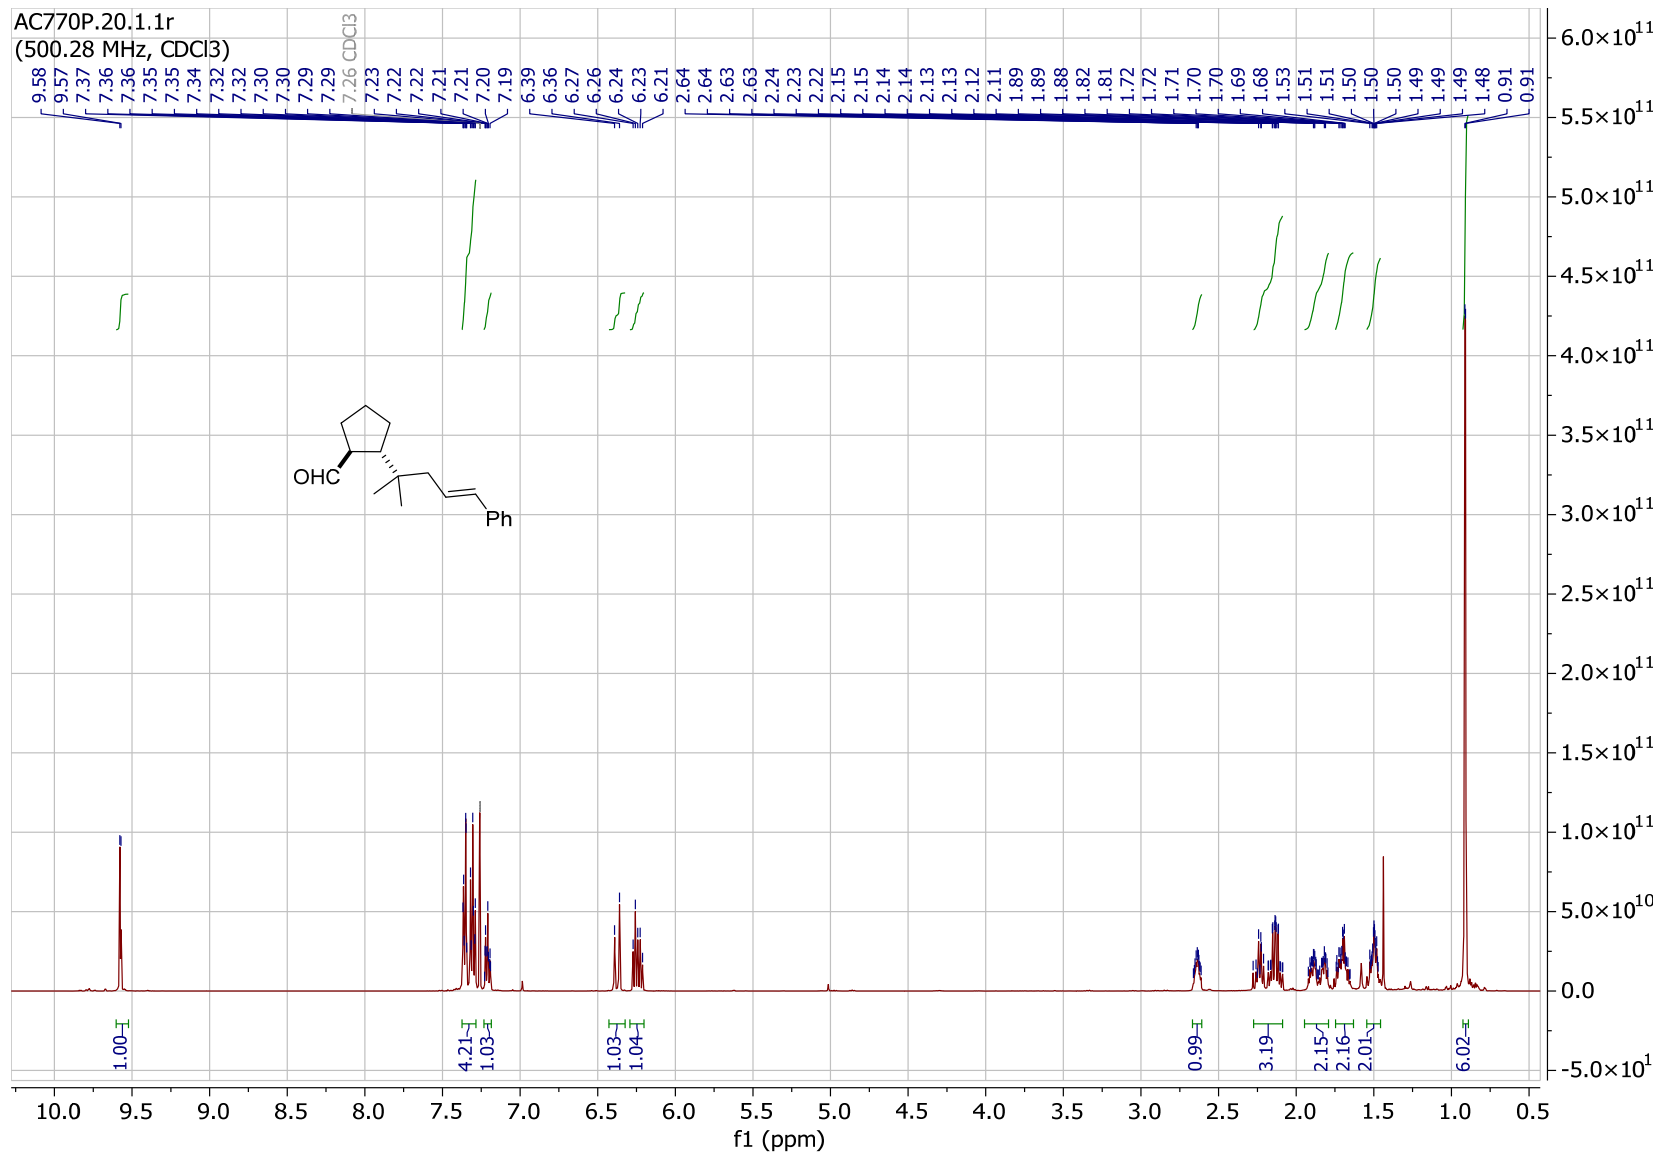

AC770P.21.1.1r  
(125.80 MHz, CDCl<sub>3</sub>)

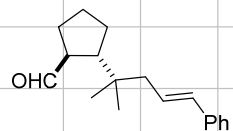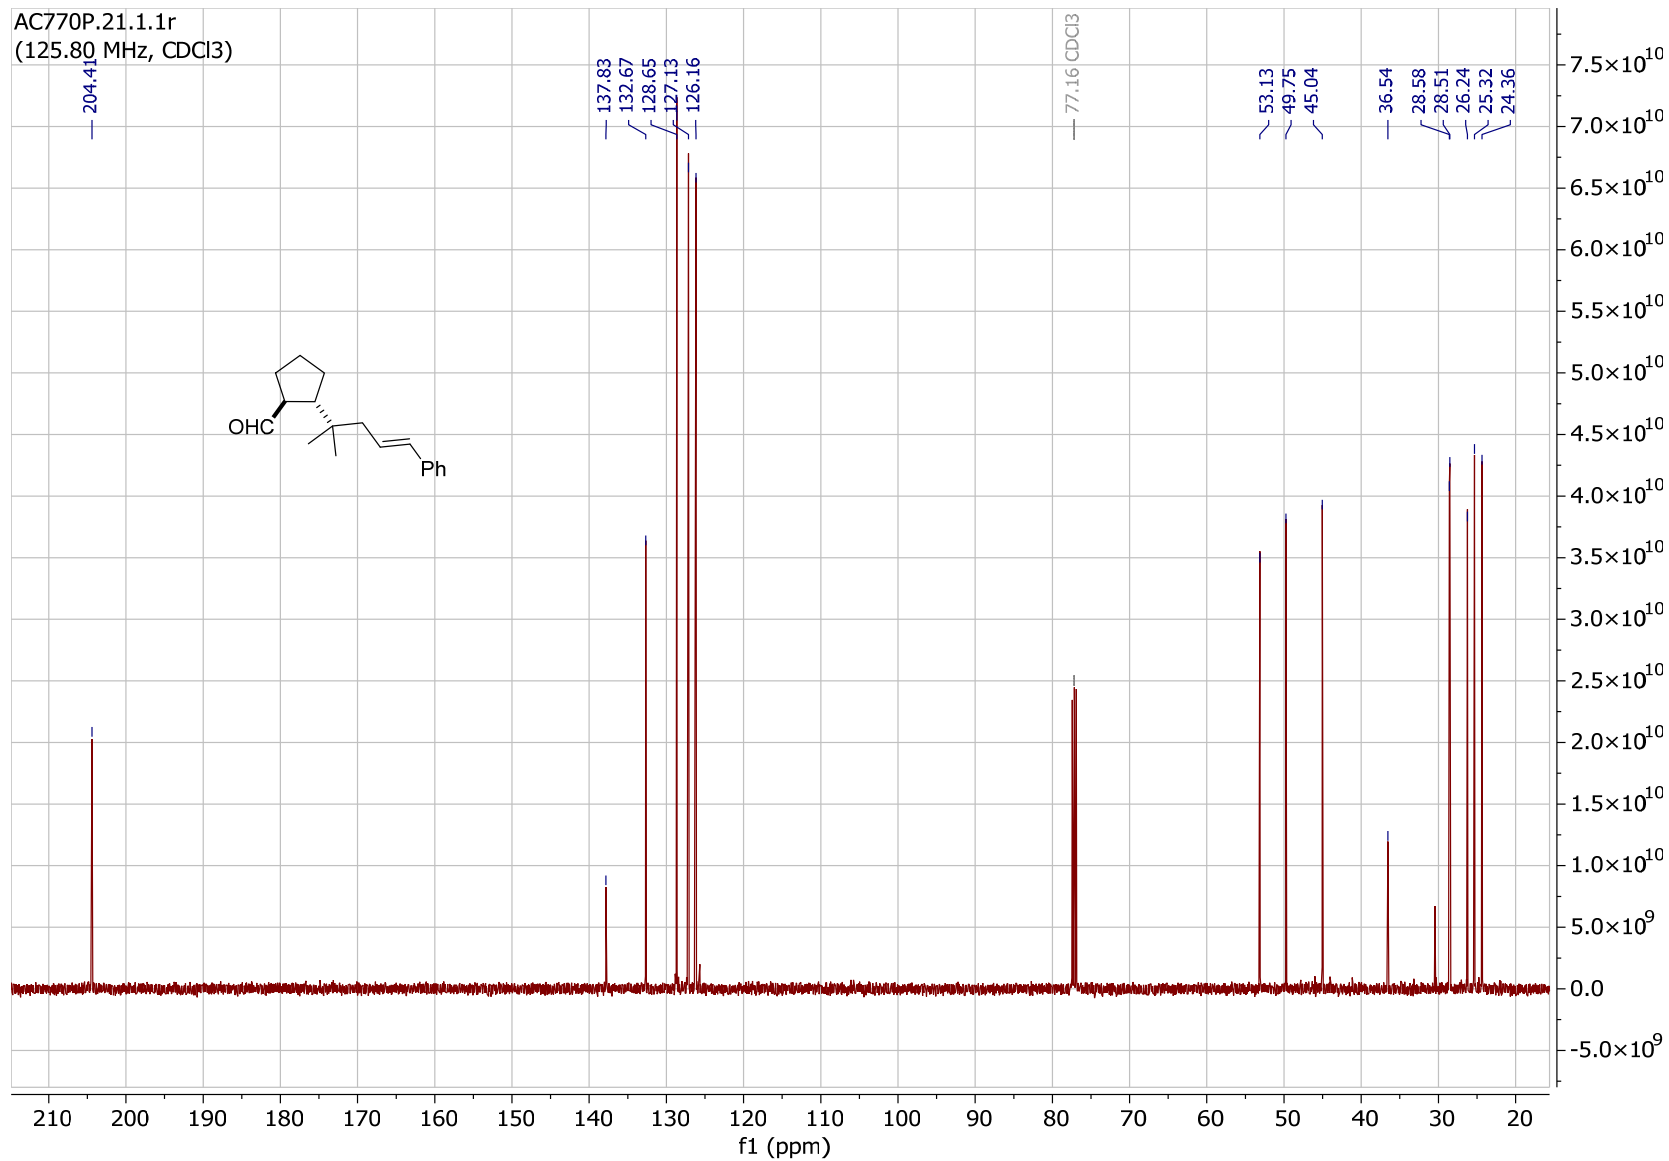

# 2-(2-Bromophenyl)cyclopentane-1-carbaldehyde 5h

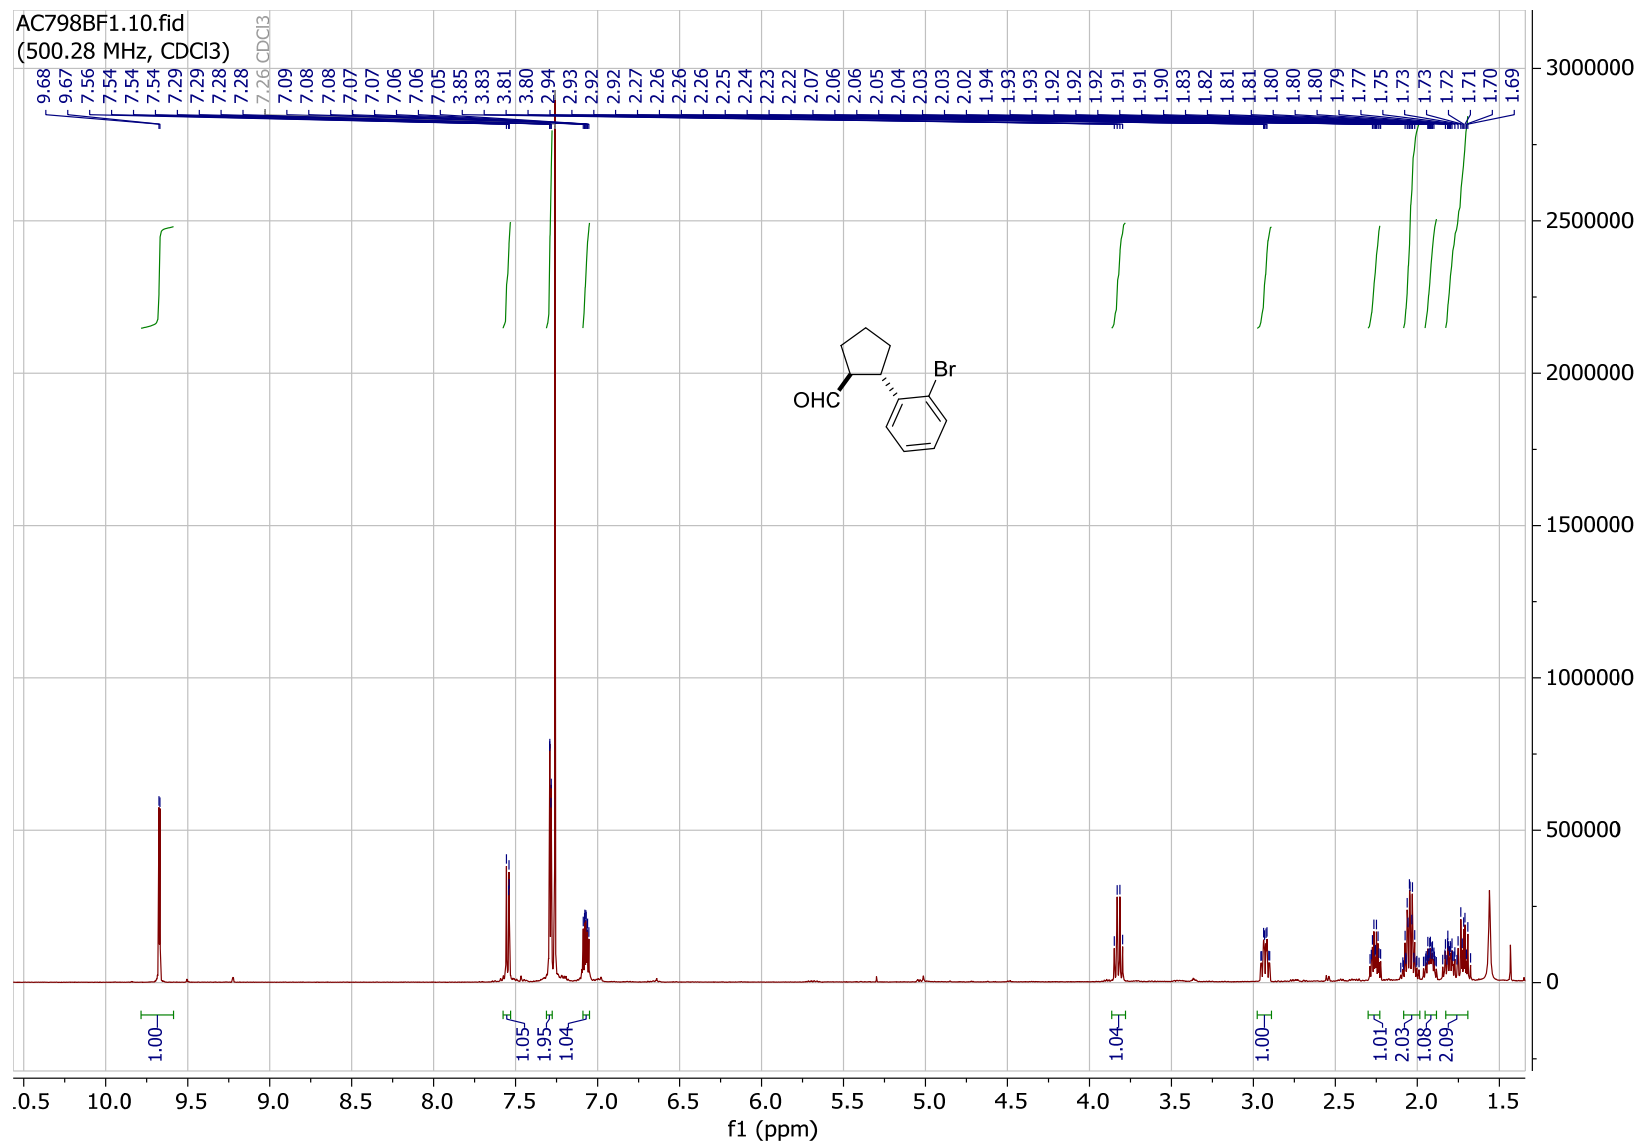

AC798BF1.11.fid  
(125.81 MHz, CDCl<sub>3</sub>)

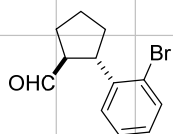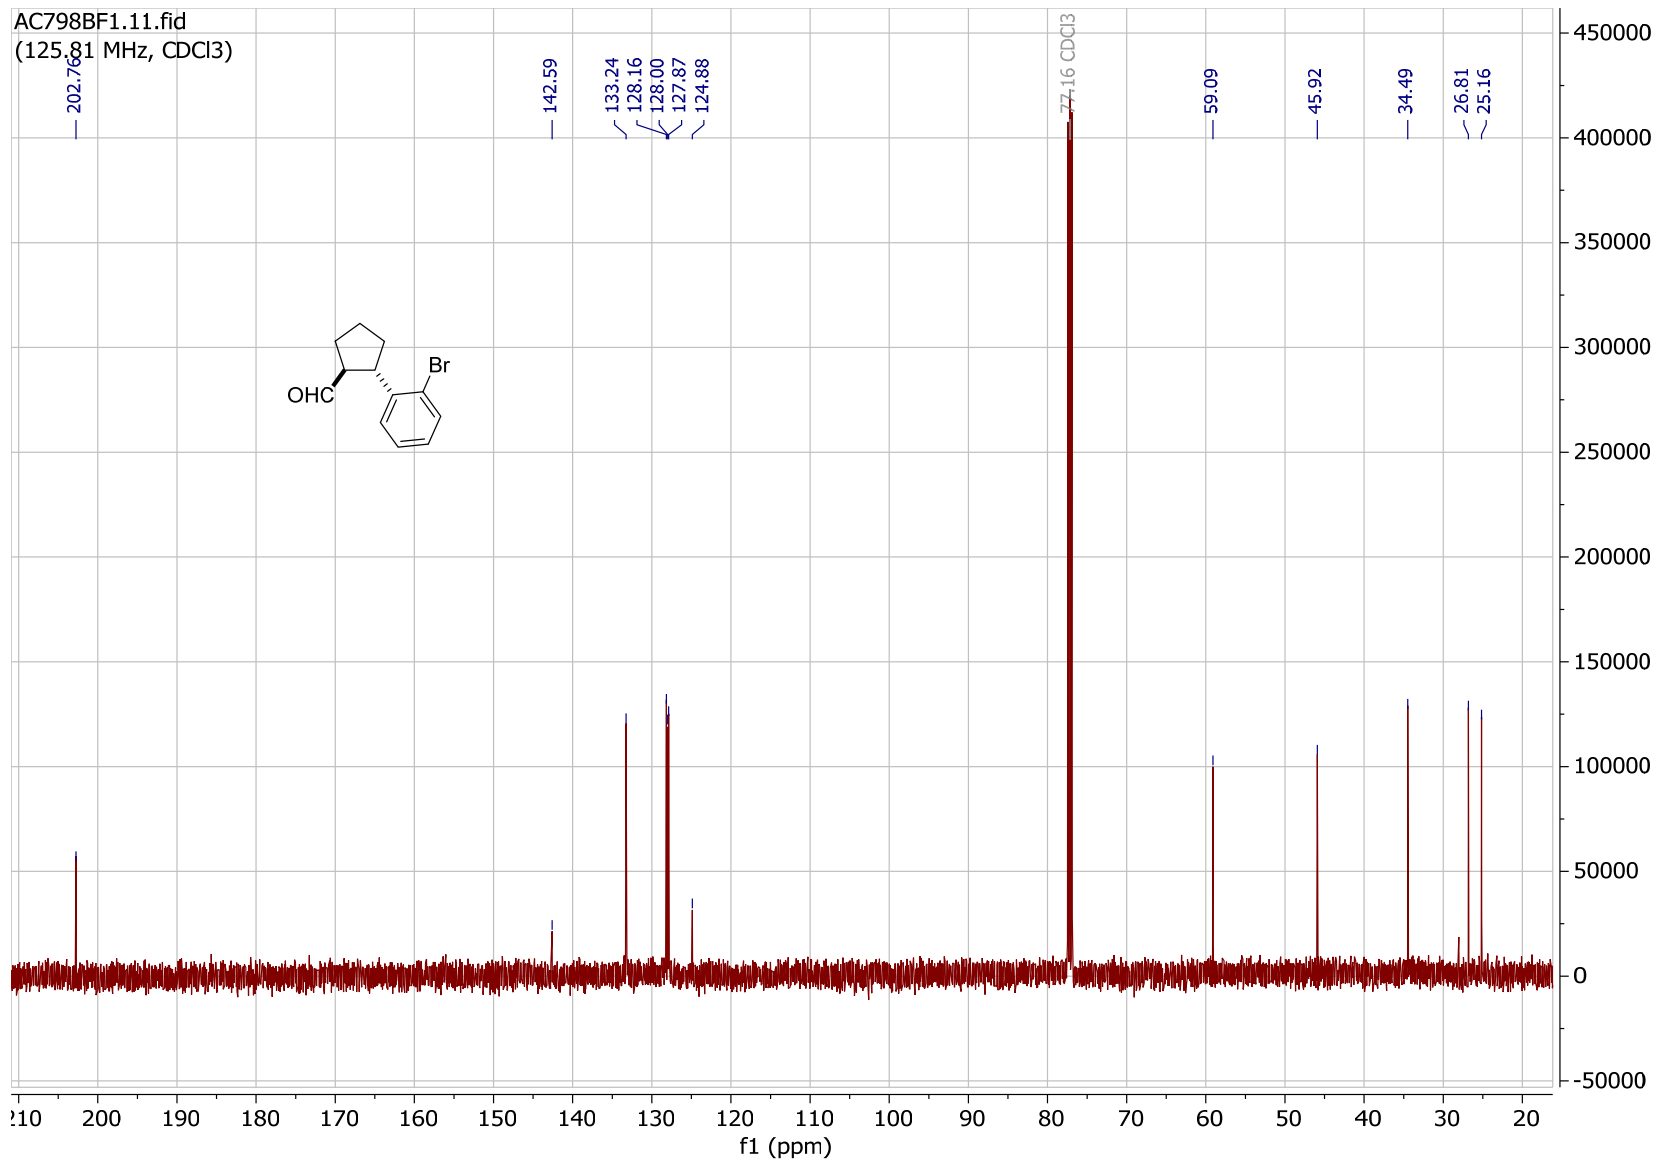



(1*S*,2*S*)-2-(Naphthalen-1-yl)cyclopentane-1-carbaldehyde 5i

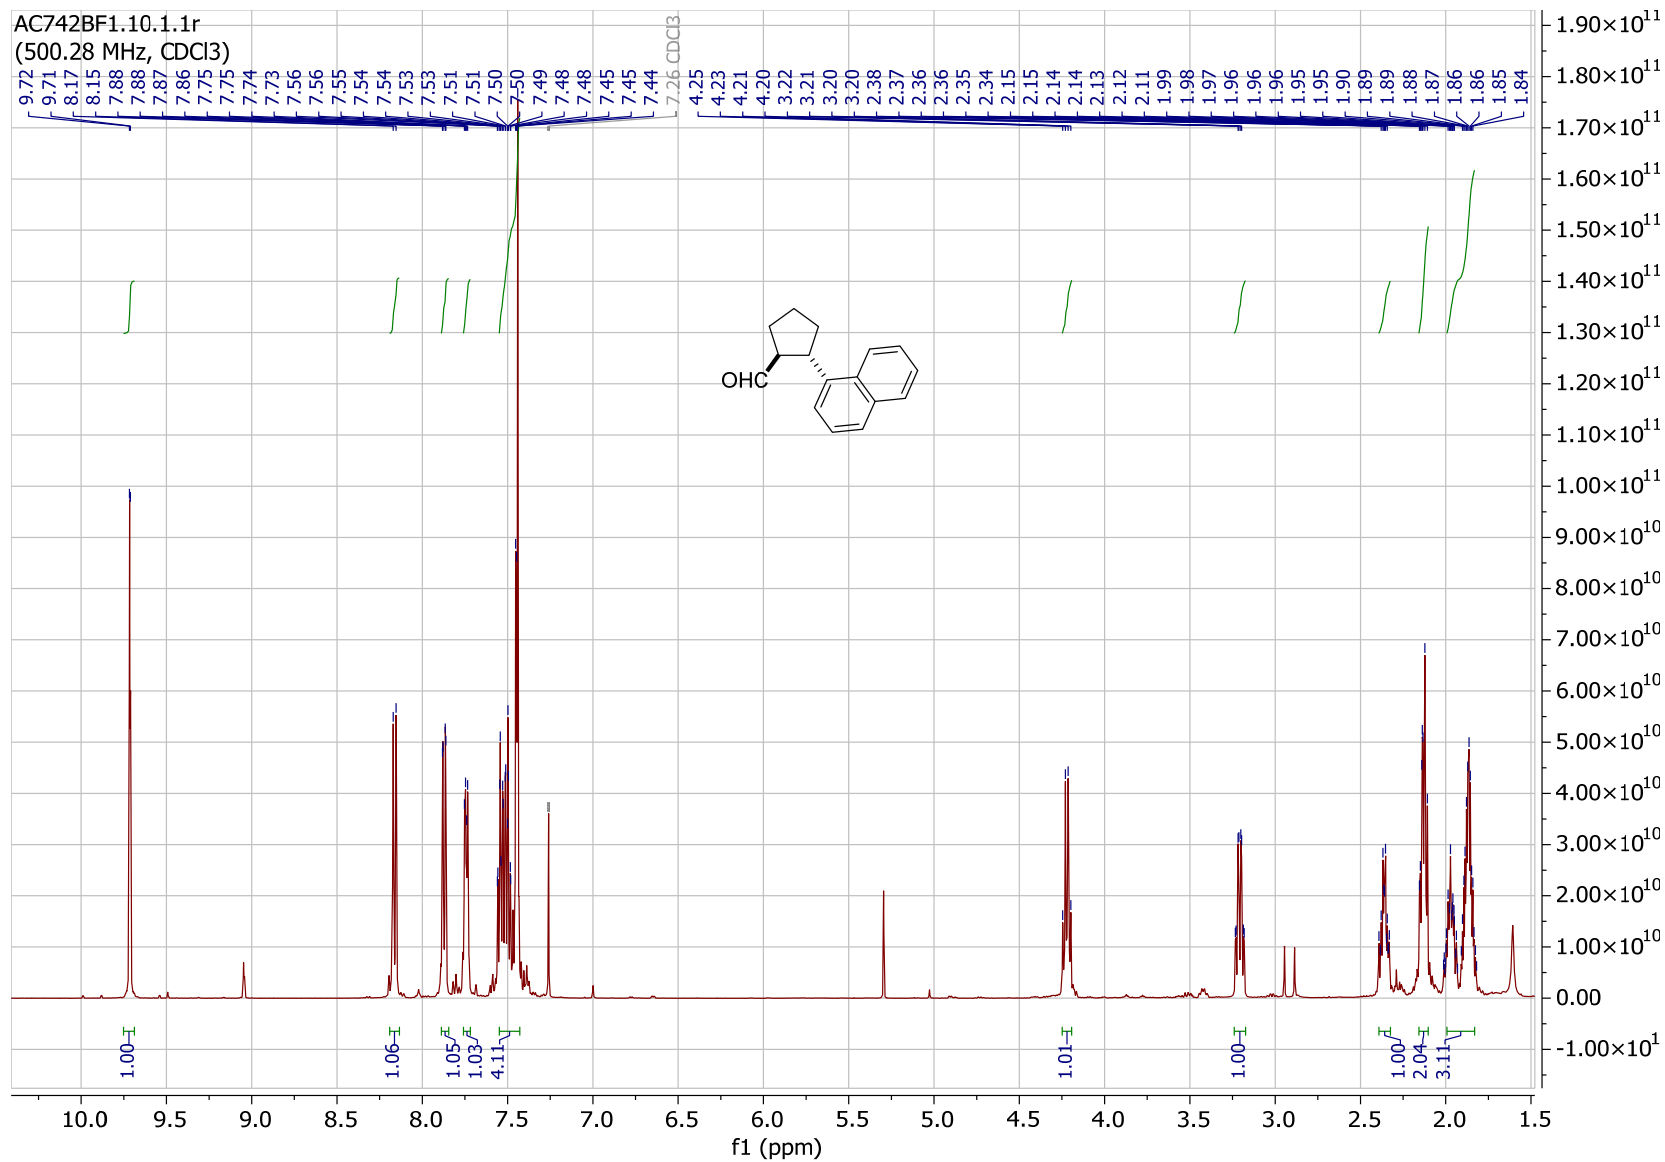

AC742BF1.11.fid  
(125.81 MHz, CDCl<sub>3</sub>)

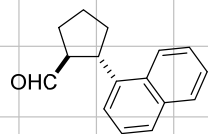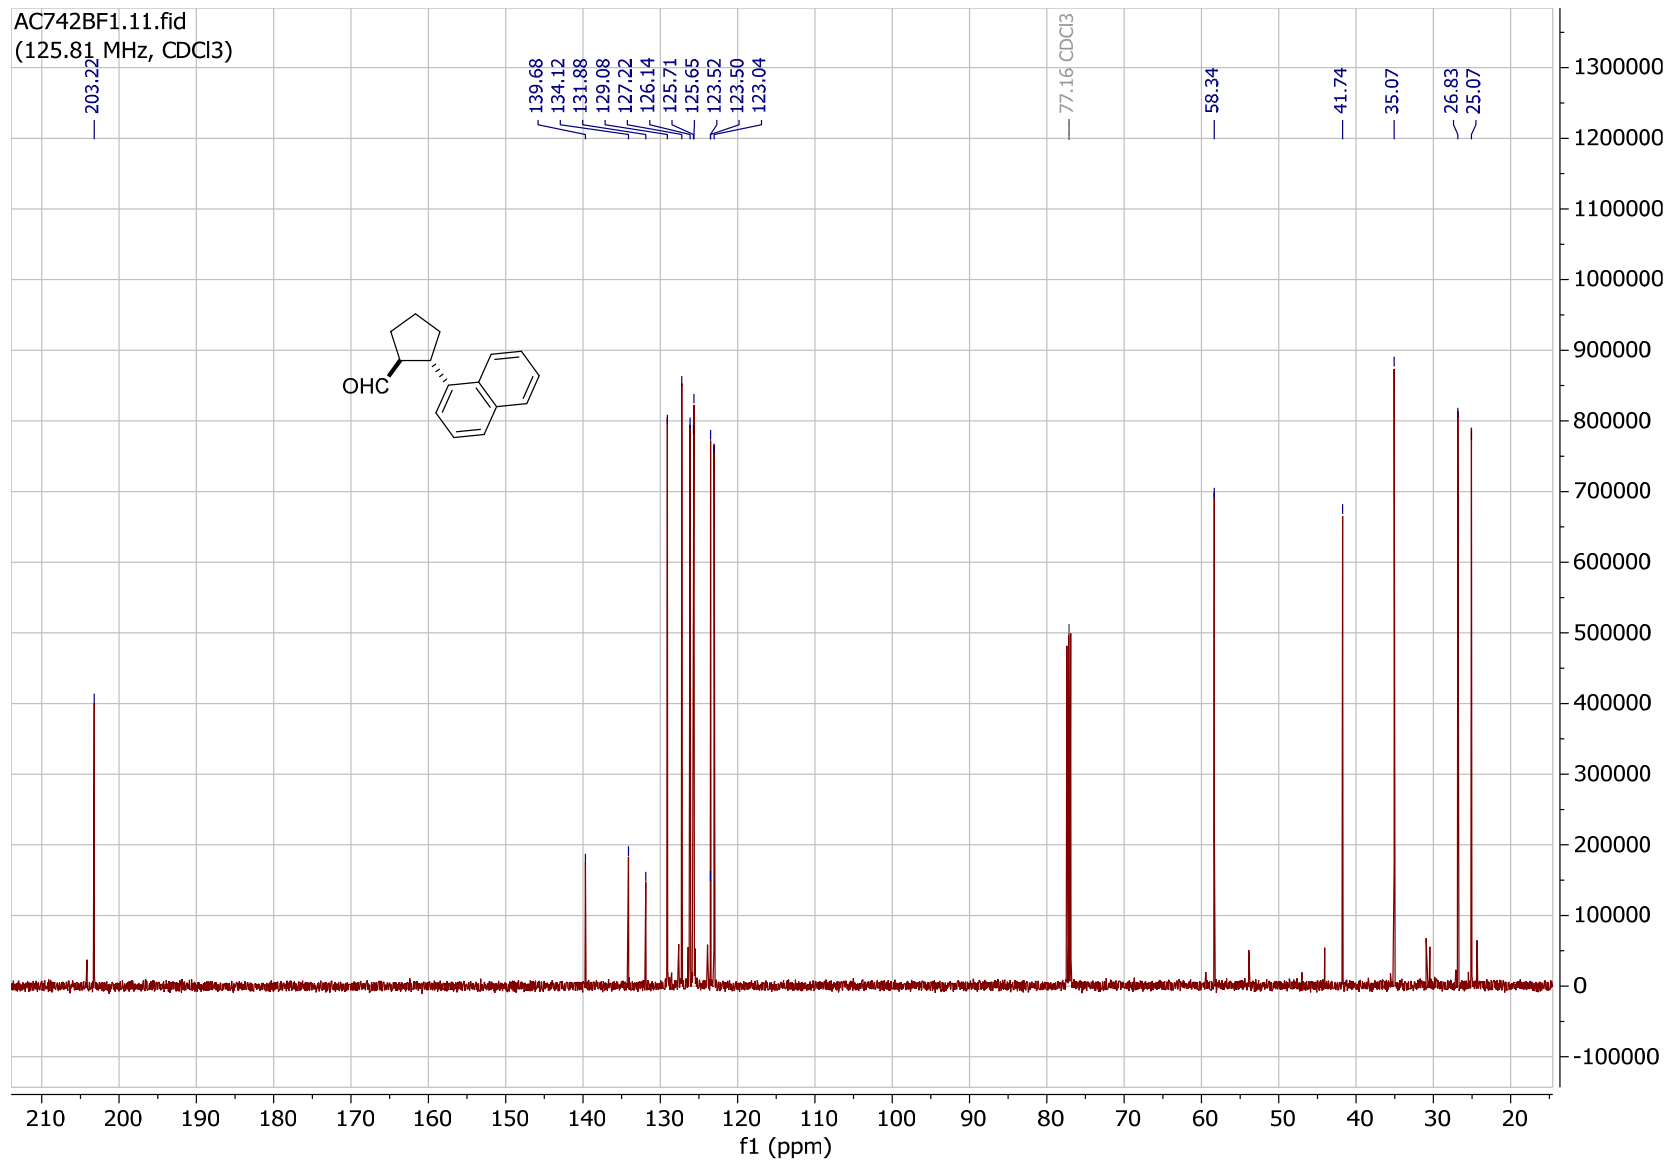

# 2-Ferrocenylcyclopentane-1-carbaldehyde 5j

AC793P.10.fid  
(500.28 MHz, DMSO)

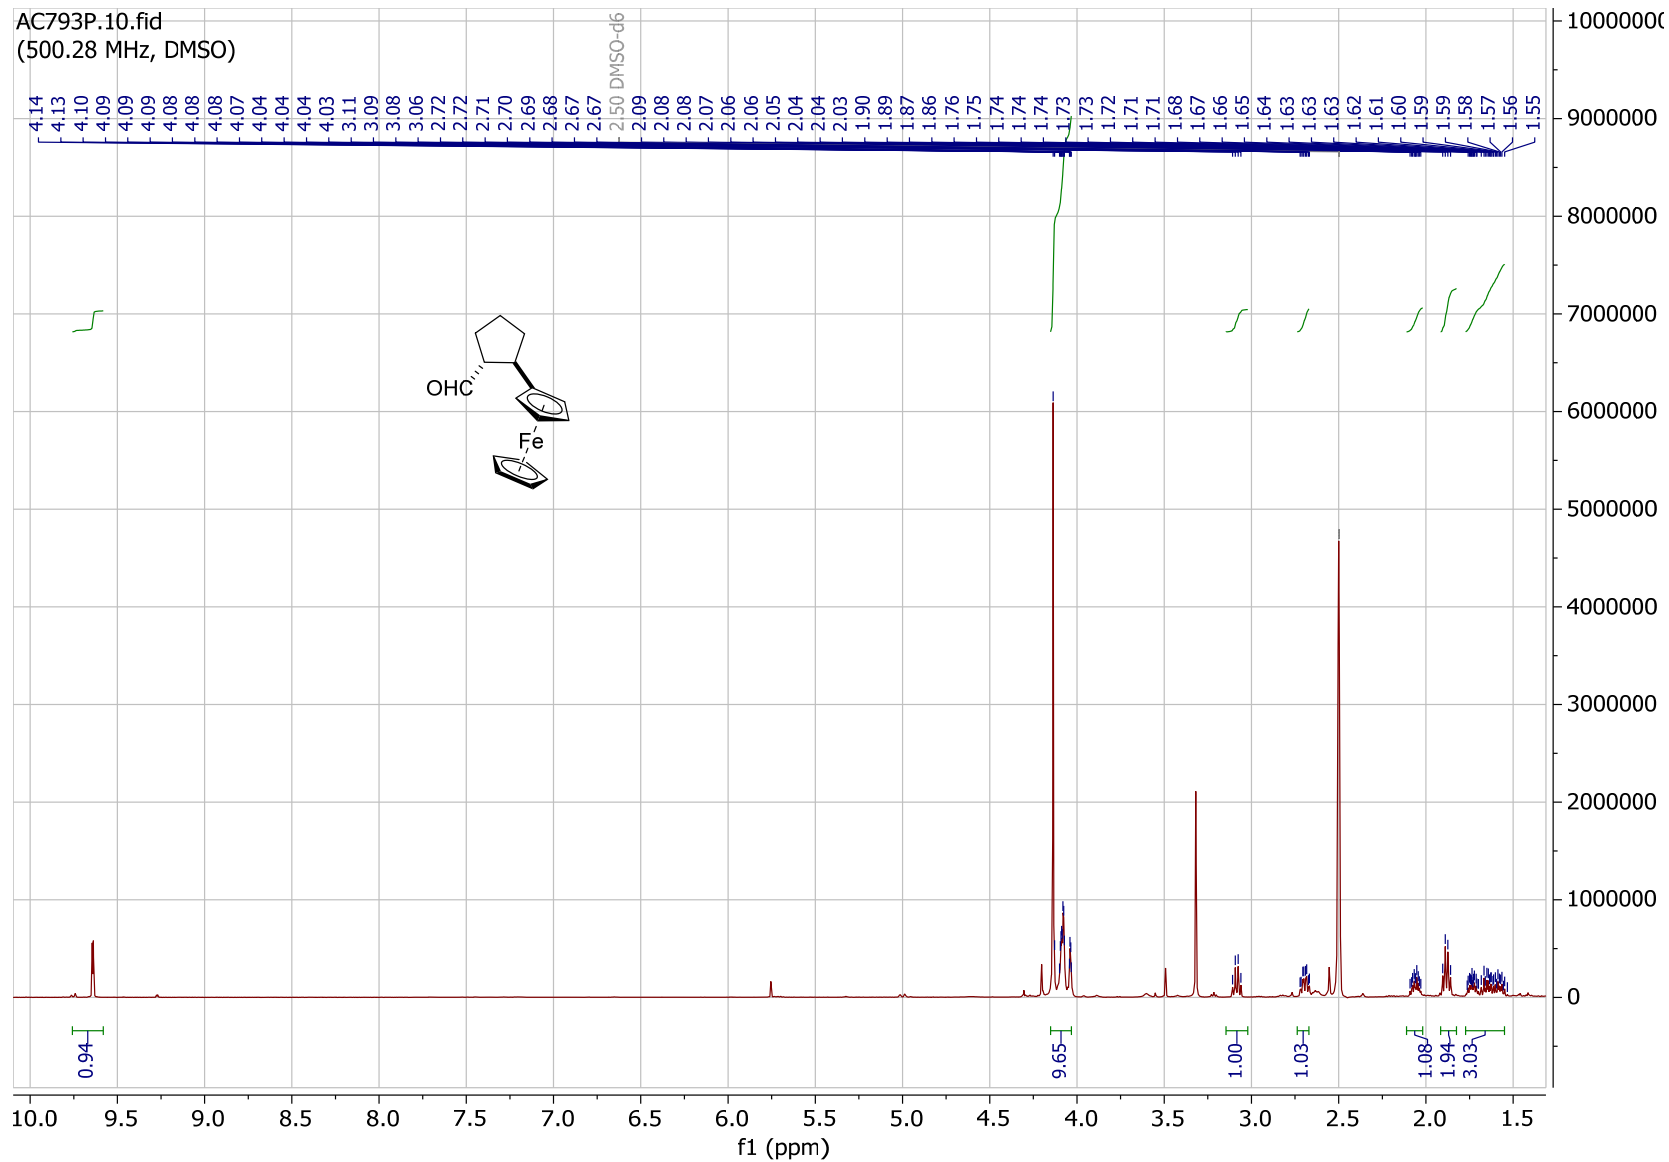

AC793P.12.fid  
(125.81 MHz, DMSO)

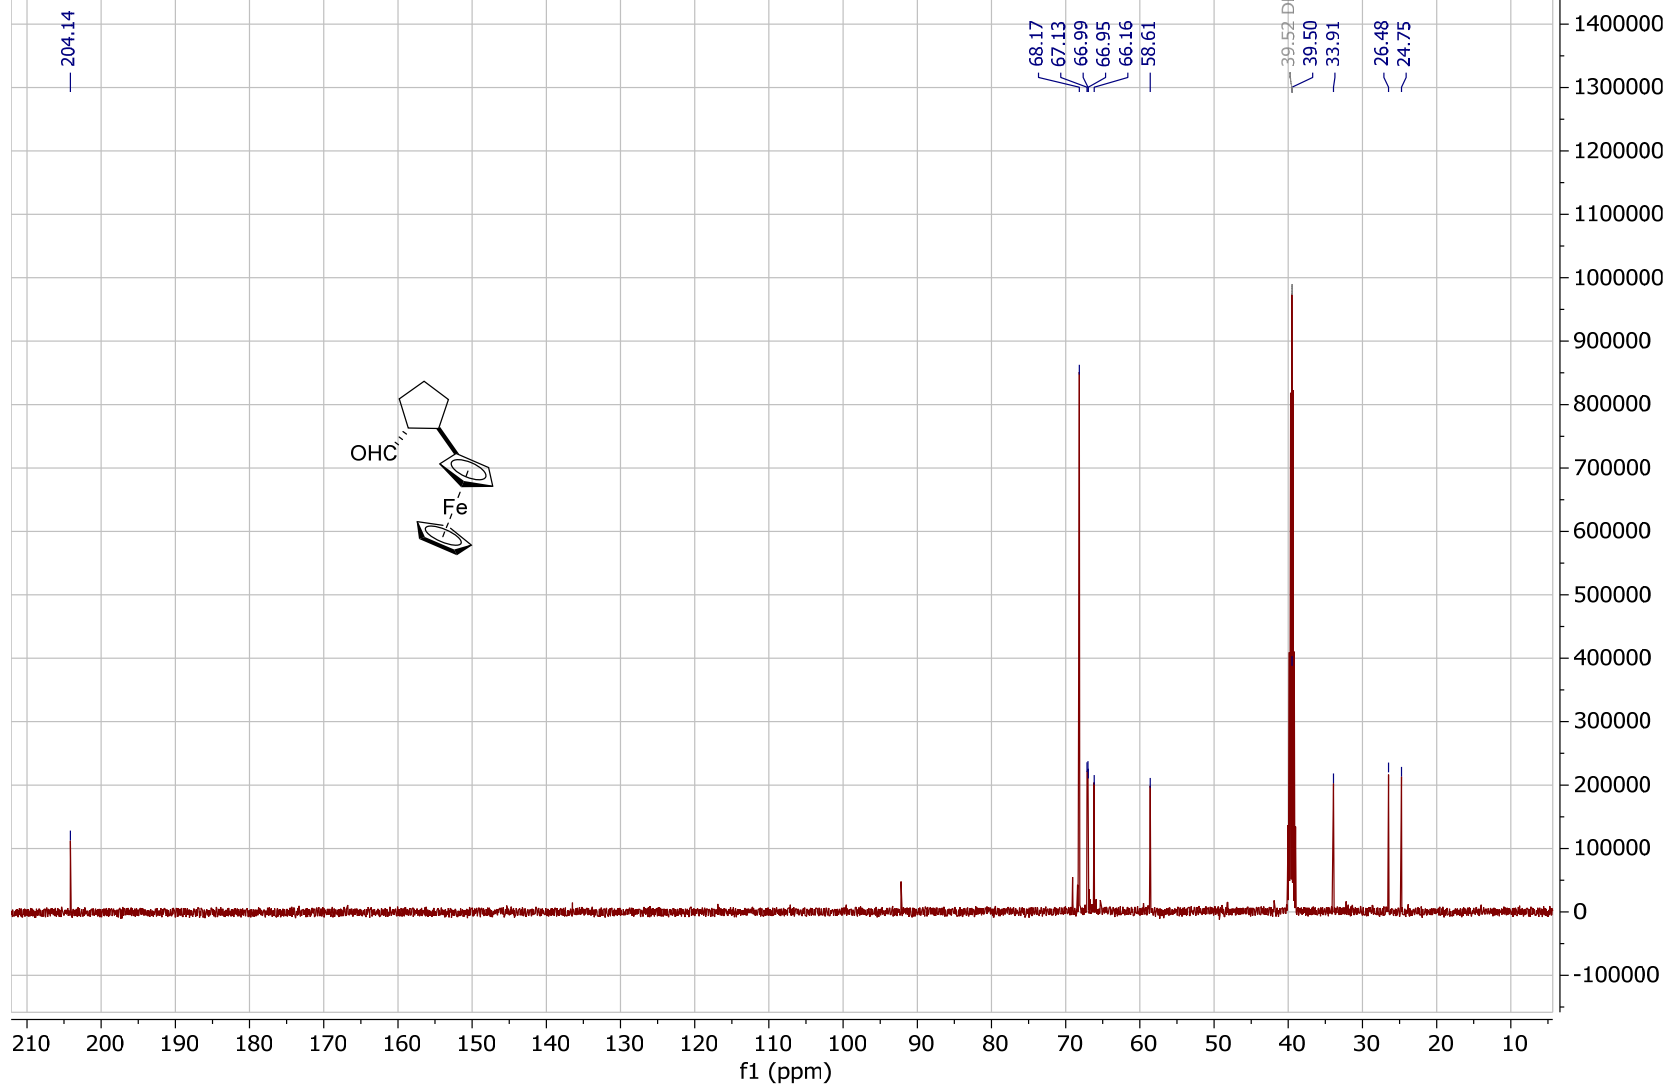

(1S,2S)-2-(Thiophen-2-yl)cyclopentane-1-carbaldehyde 5k

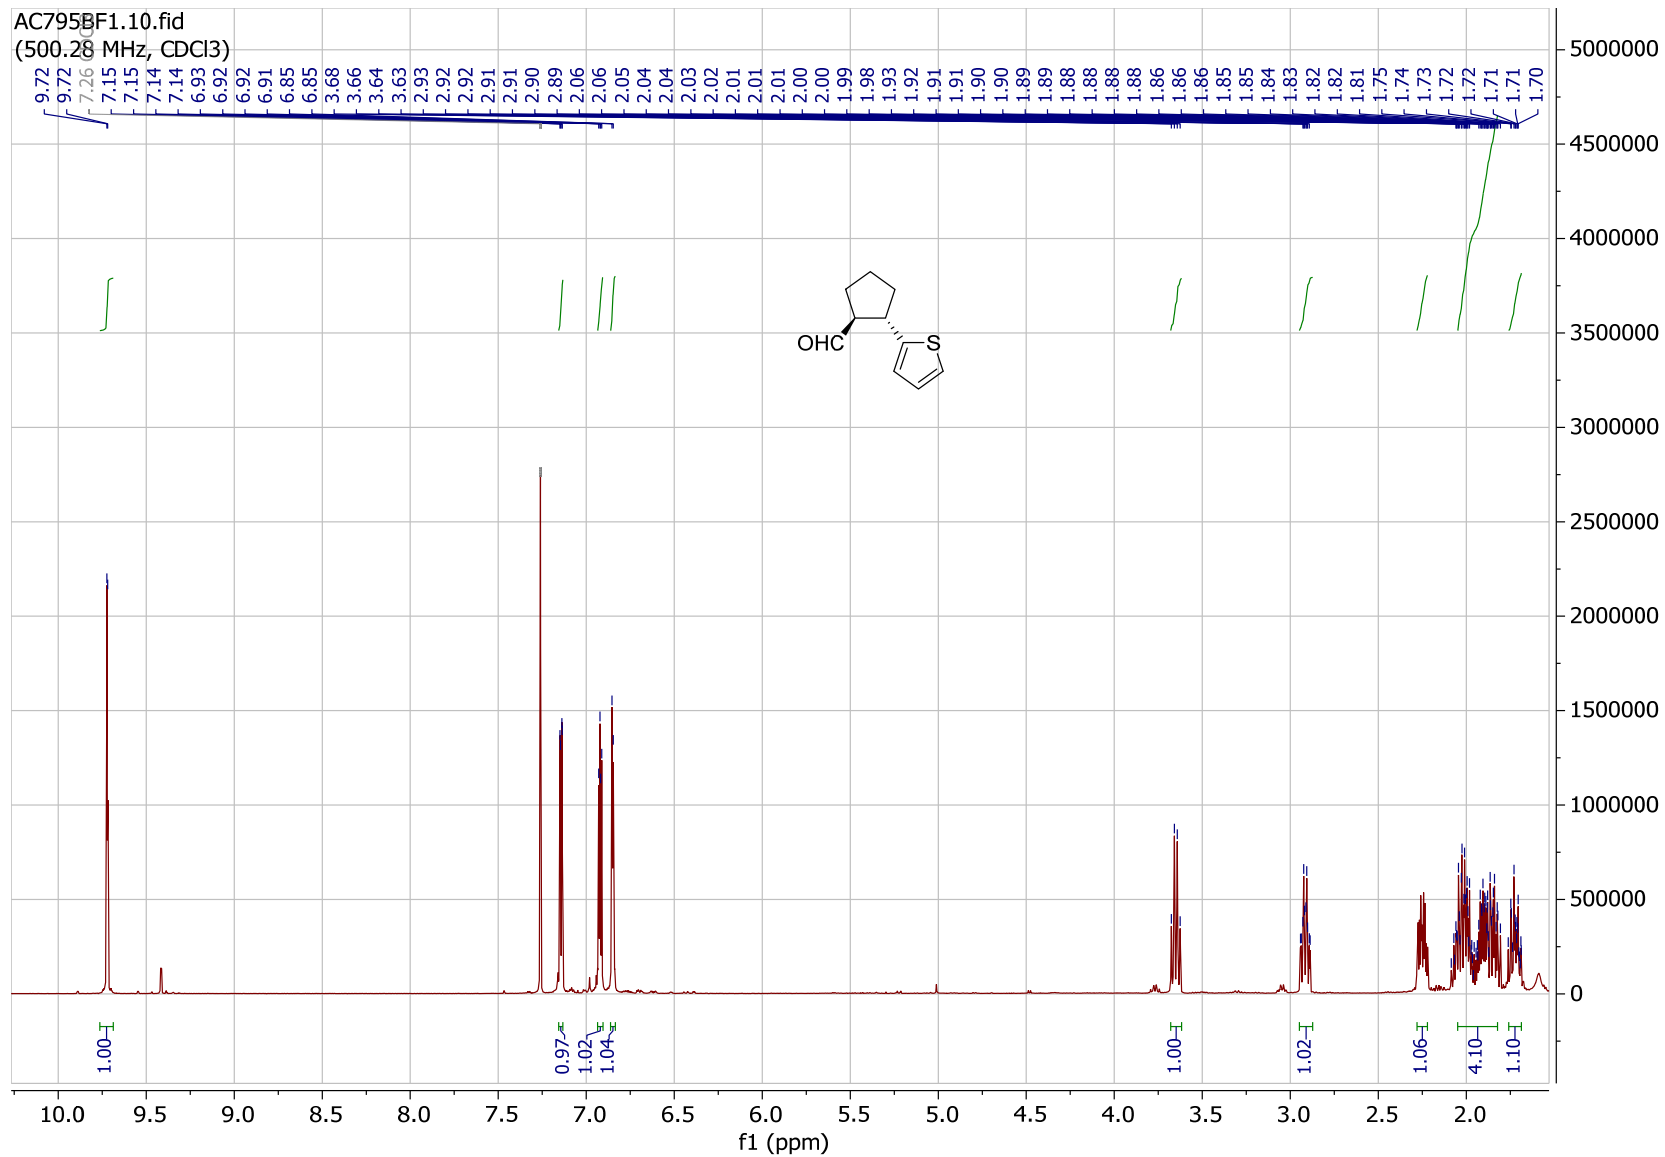

AC795BF1.11.fid  
(125.81 MHz, CDCl<sub>3</sub>)

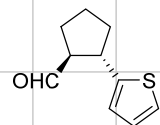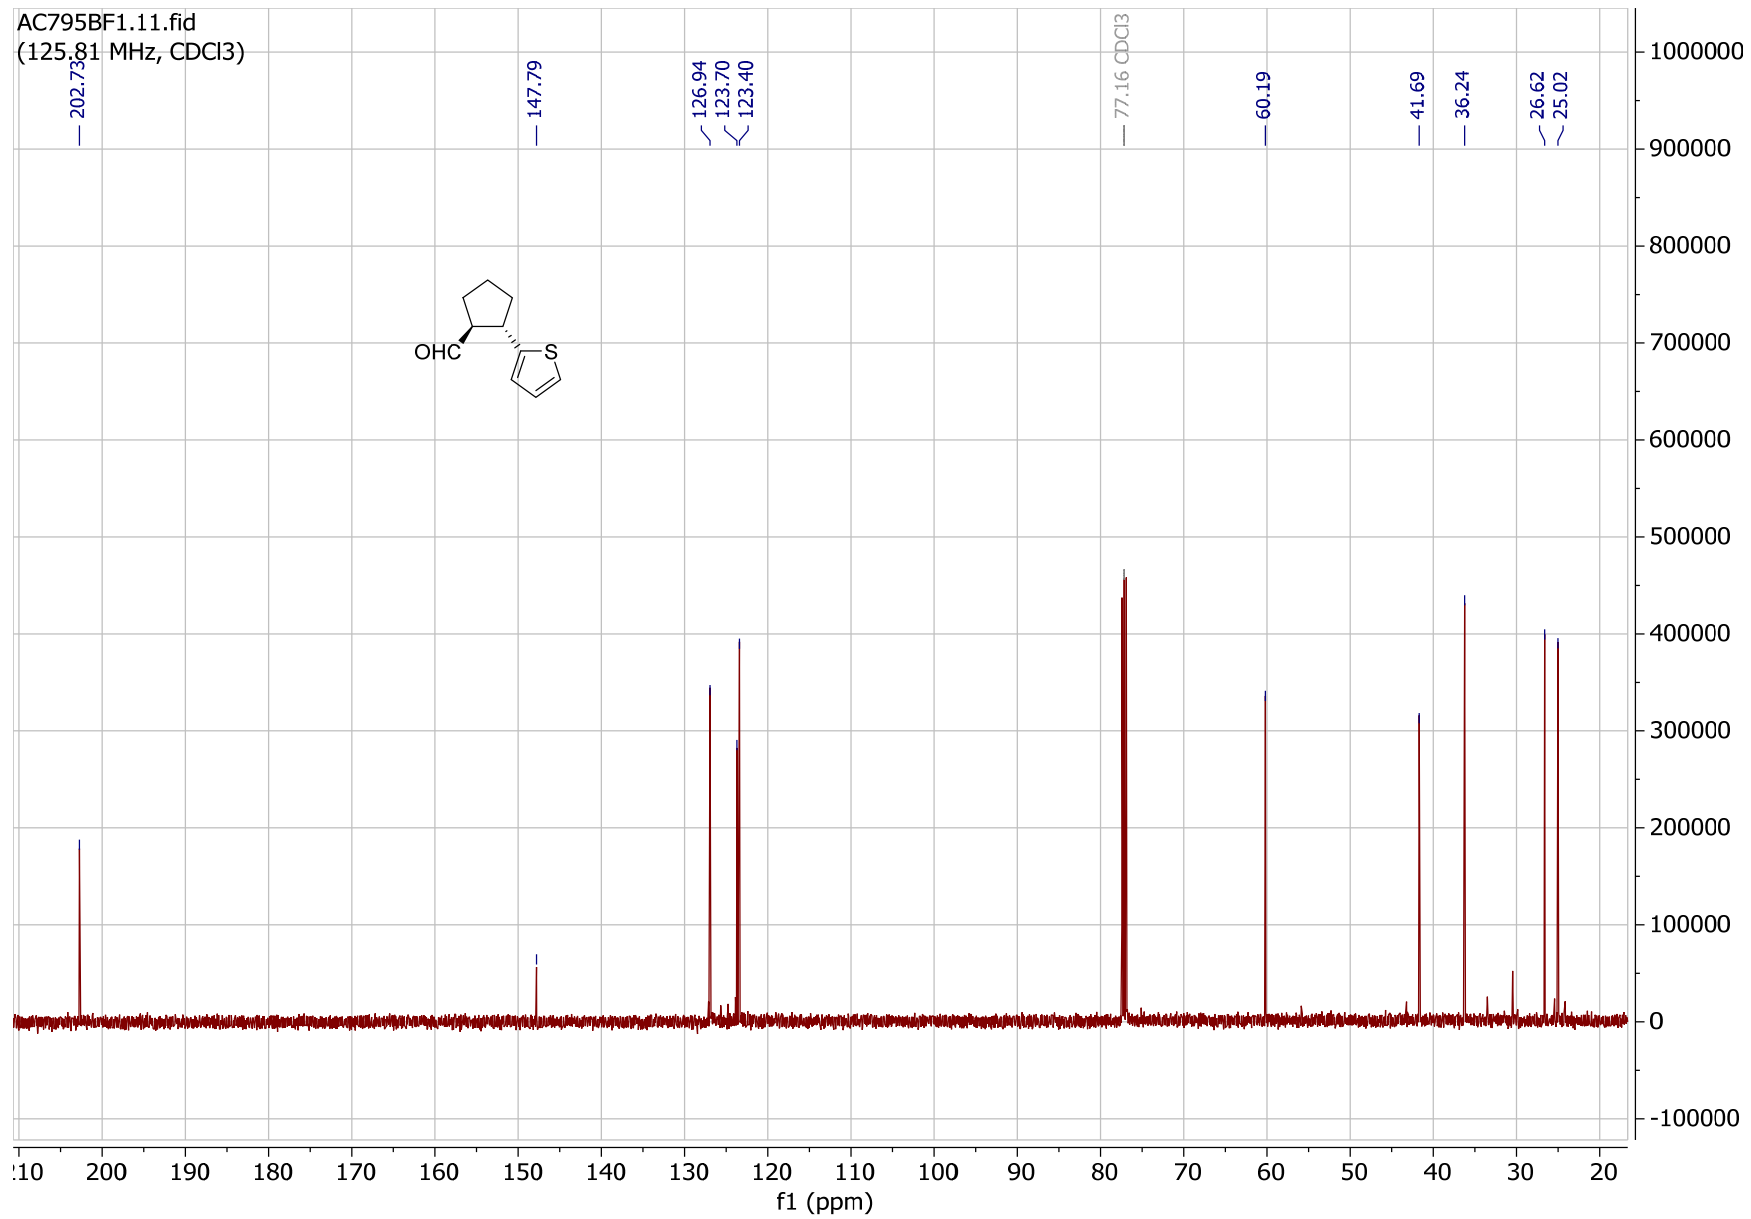

**(1*SR*,2*SR*)-2-[2-(Benzyloxy)ethyl]cyclopentane-1-carbaldehyde 5I**

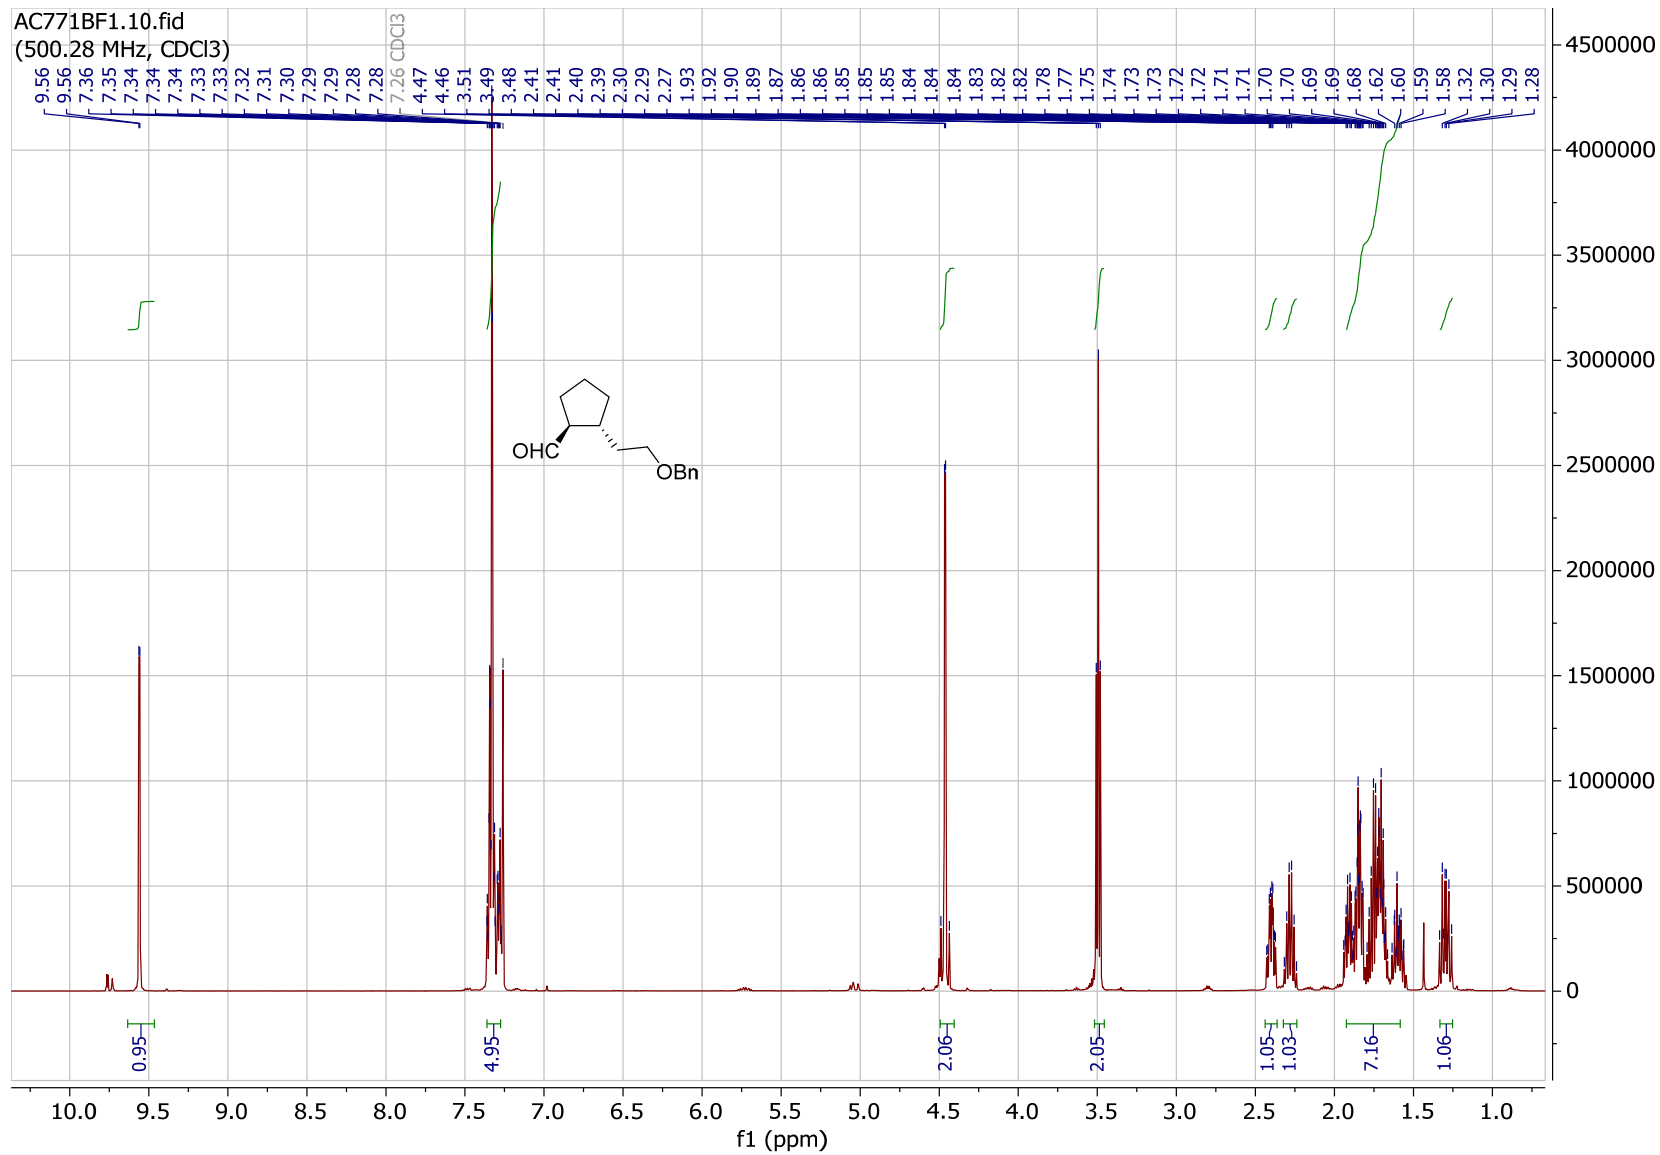

AC771BF1.12.fid  
(125.81 MHz, CDCl<sub>3</sub>)

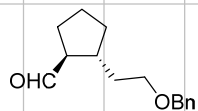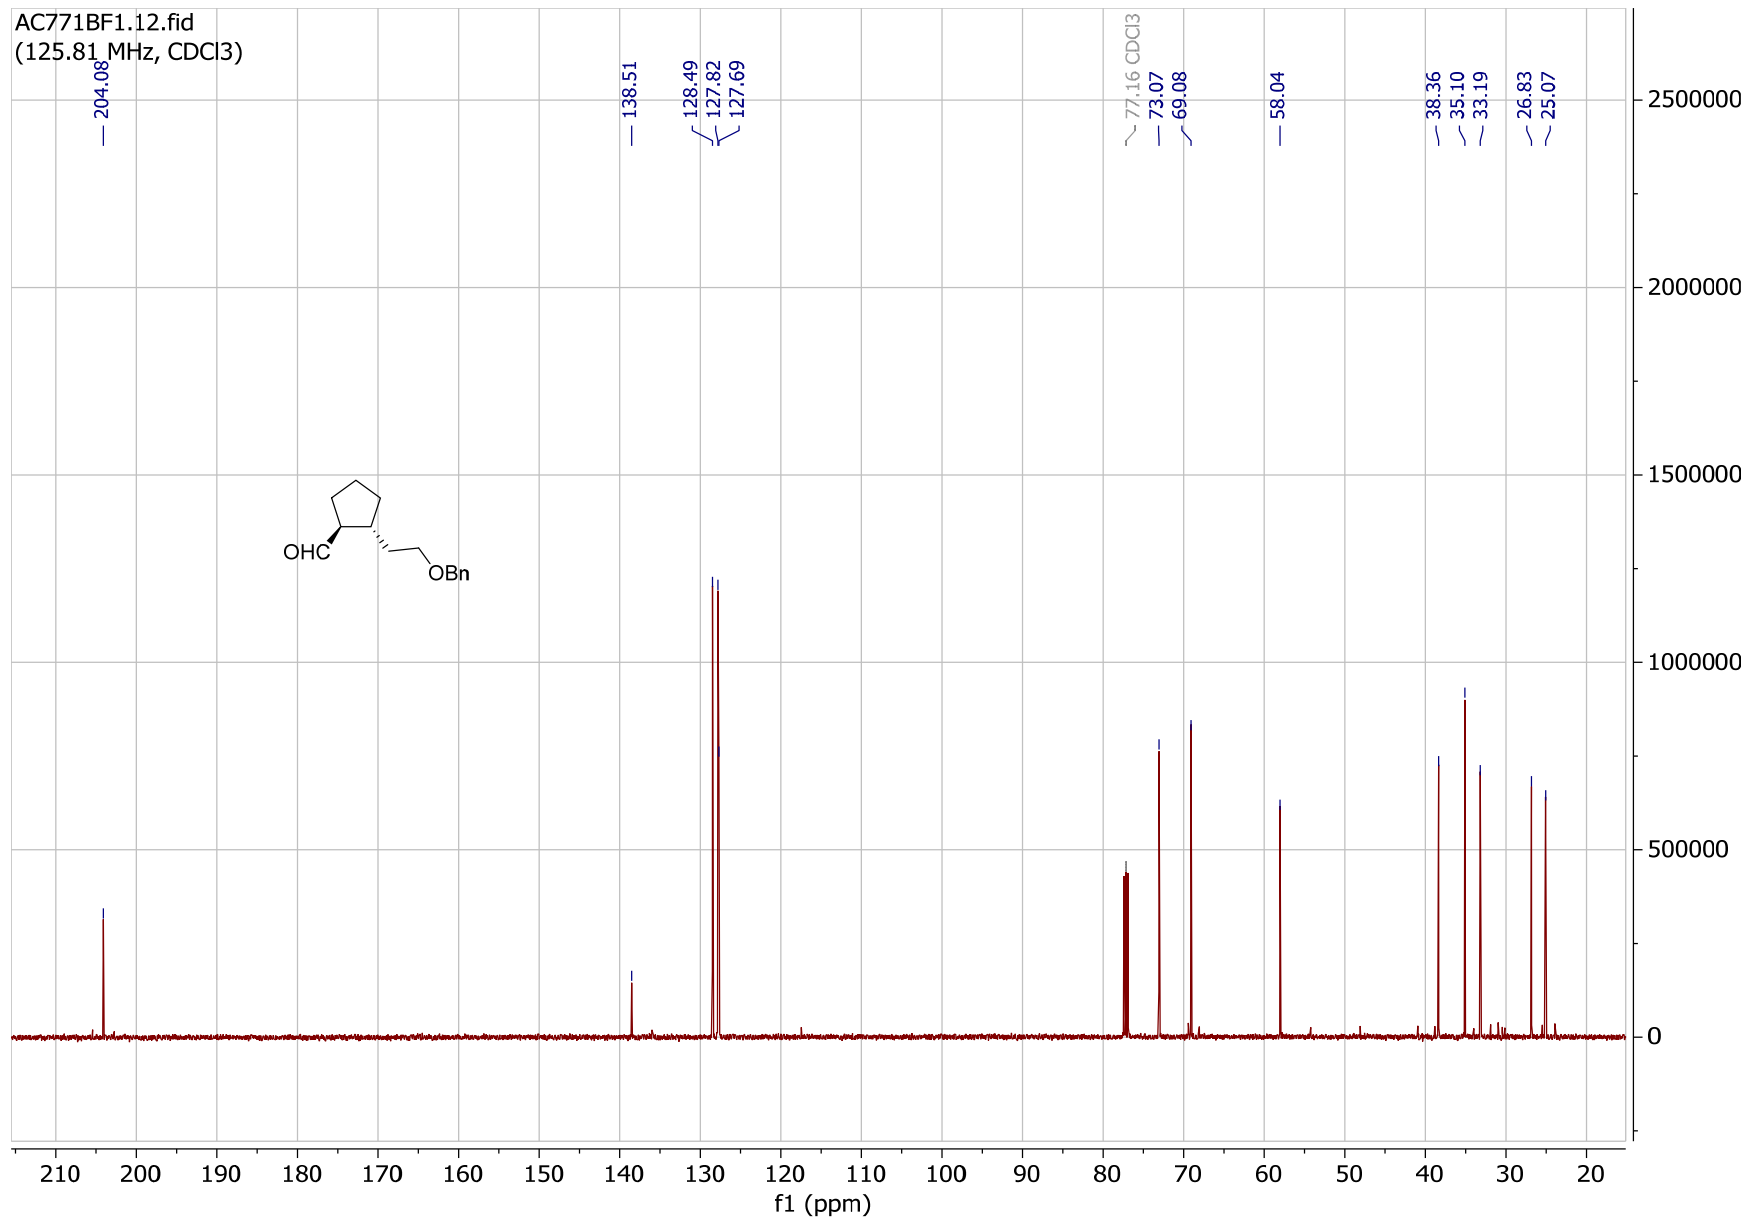



# Methyl (E)-3-[(1R,2S)-2-phenylcyclopentyl]acrylate 6a

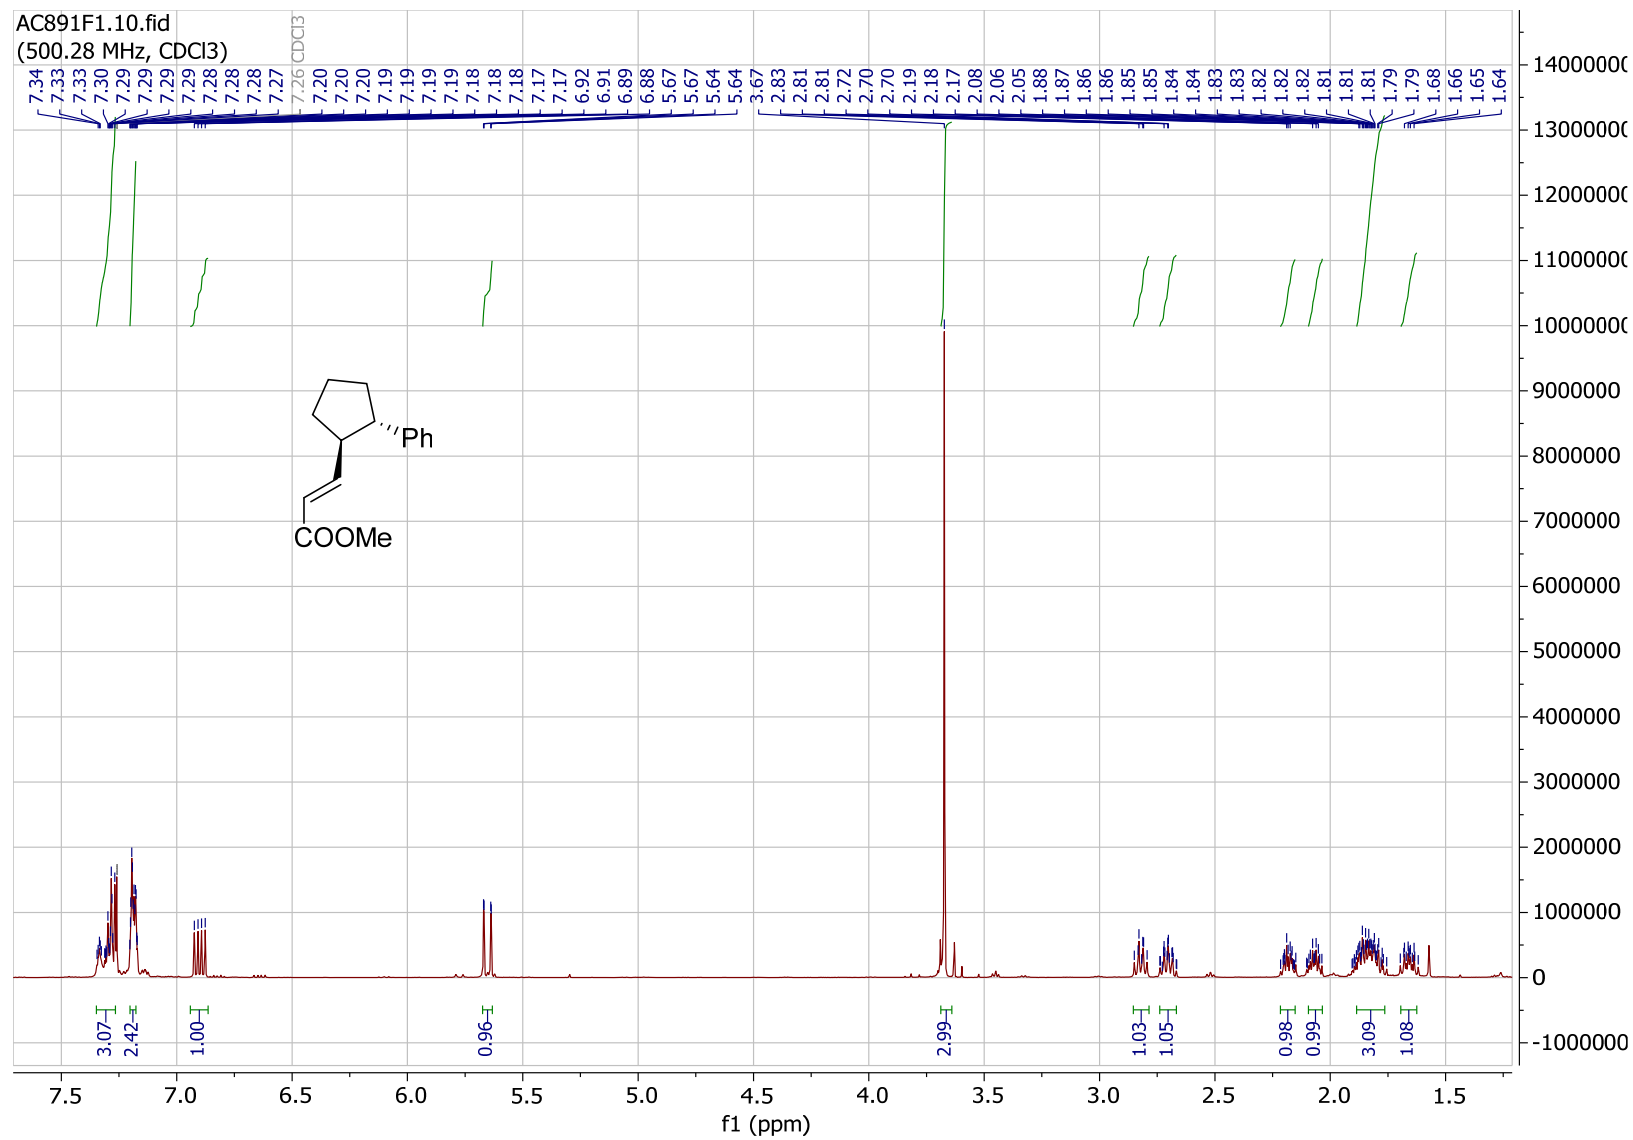

AC891F1.11.fid  
(125.81 MHz, CDCl<sub>3</sub>)

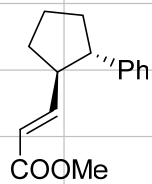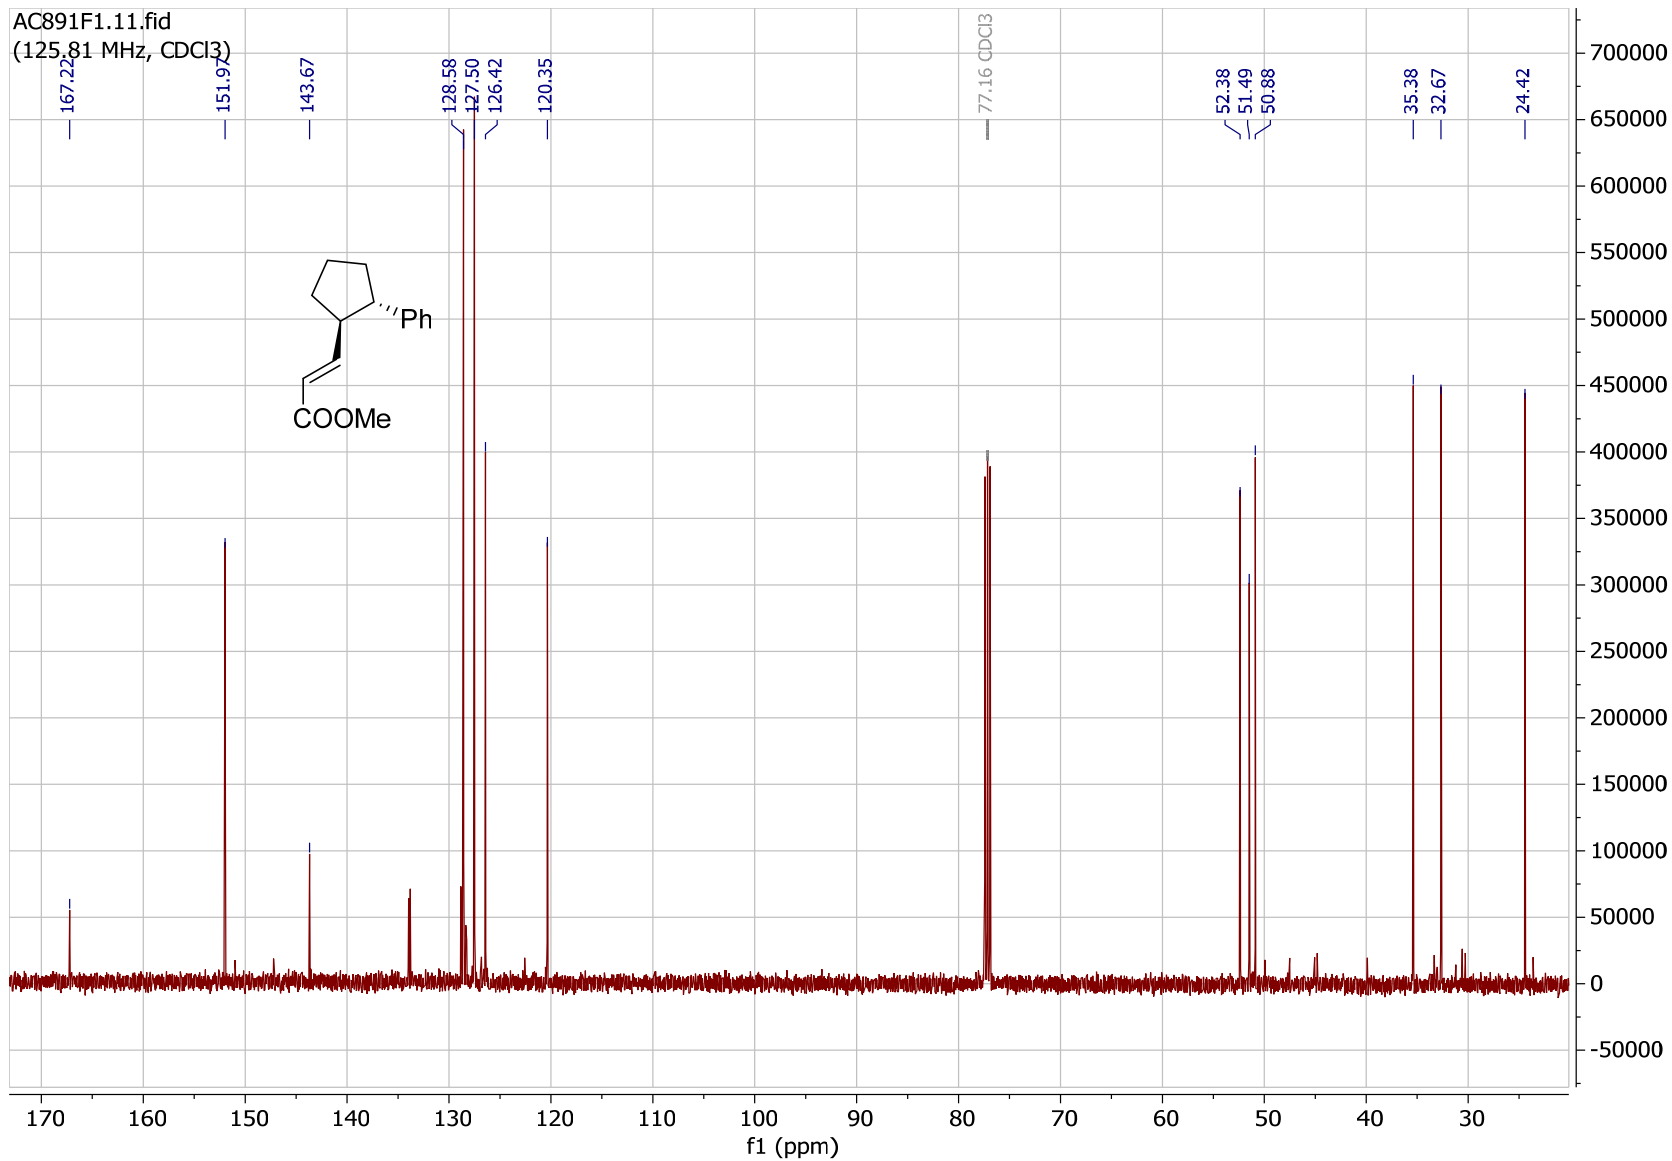

**(R)-2-Methyl-N-{(E)-[(1S,2S)-2-phenylcyclopentyl]methylene}propane-2-sulfonamide 7a**

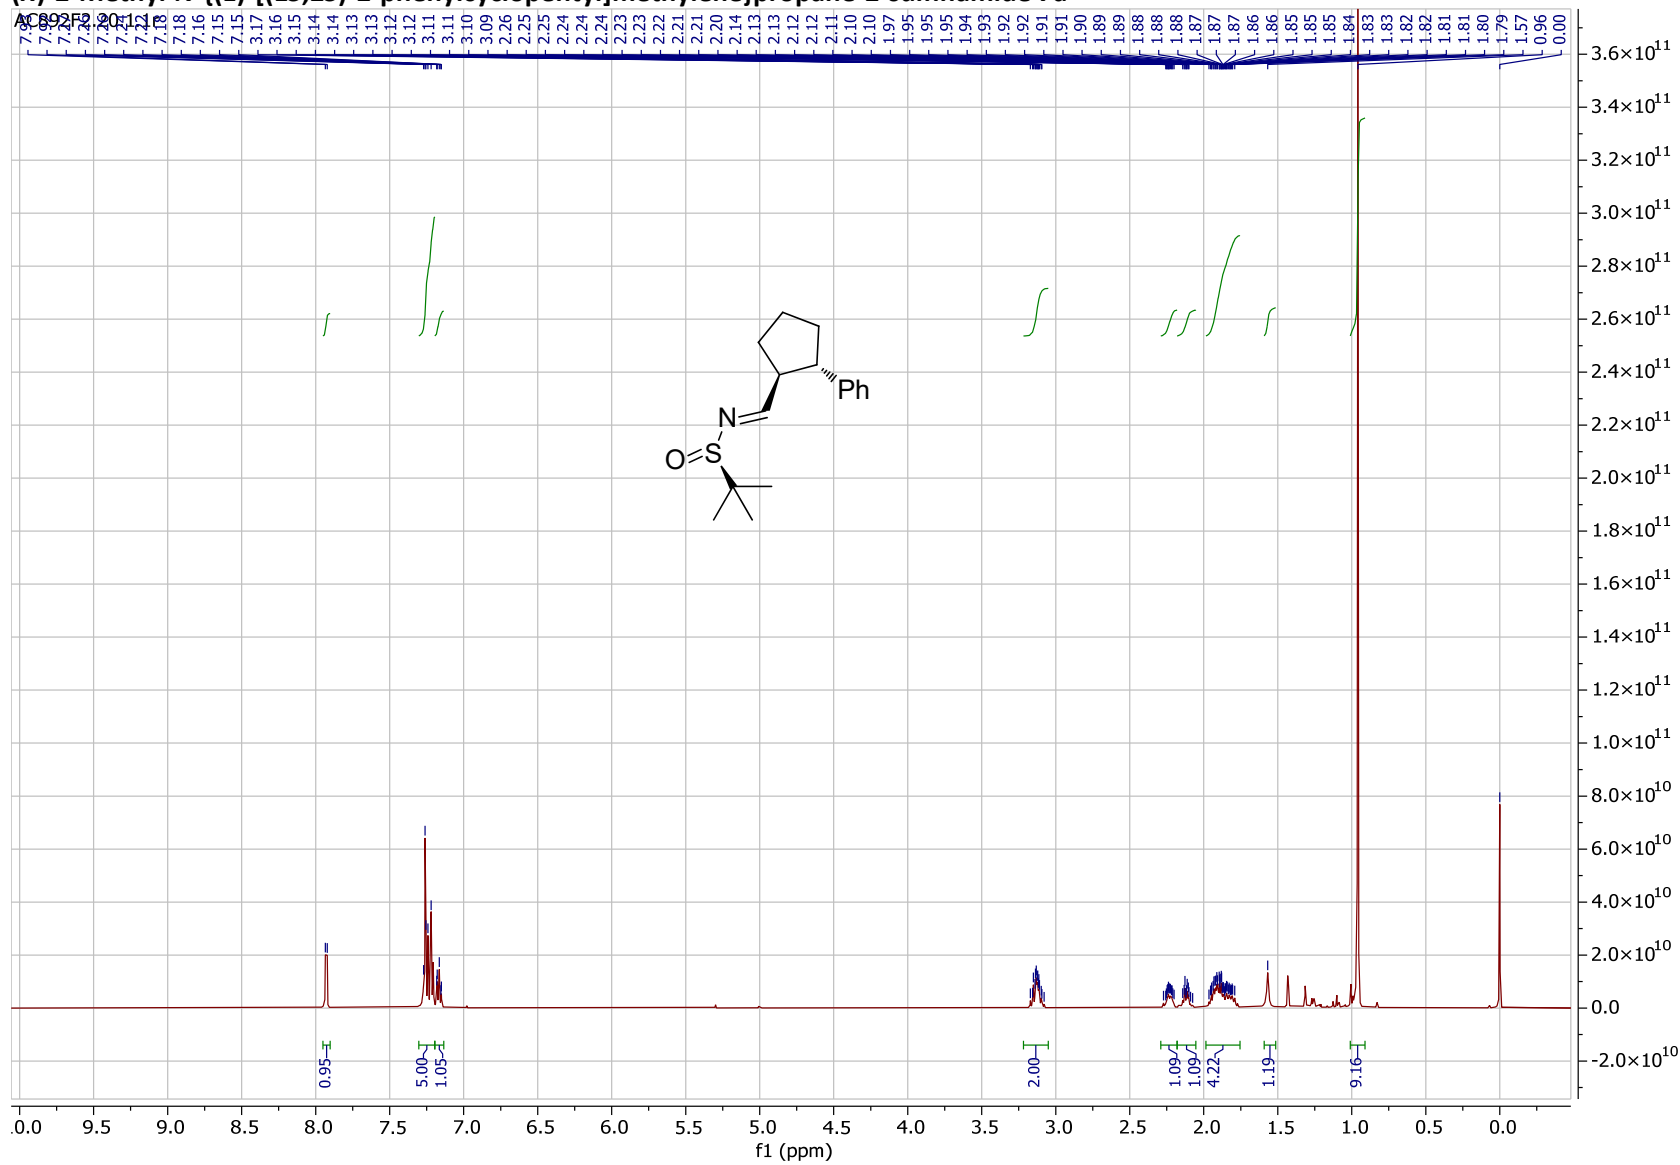

AC892F2.21.1.1r

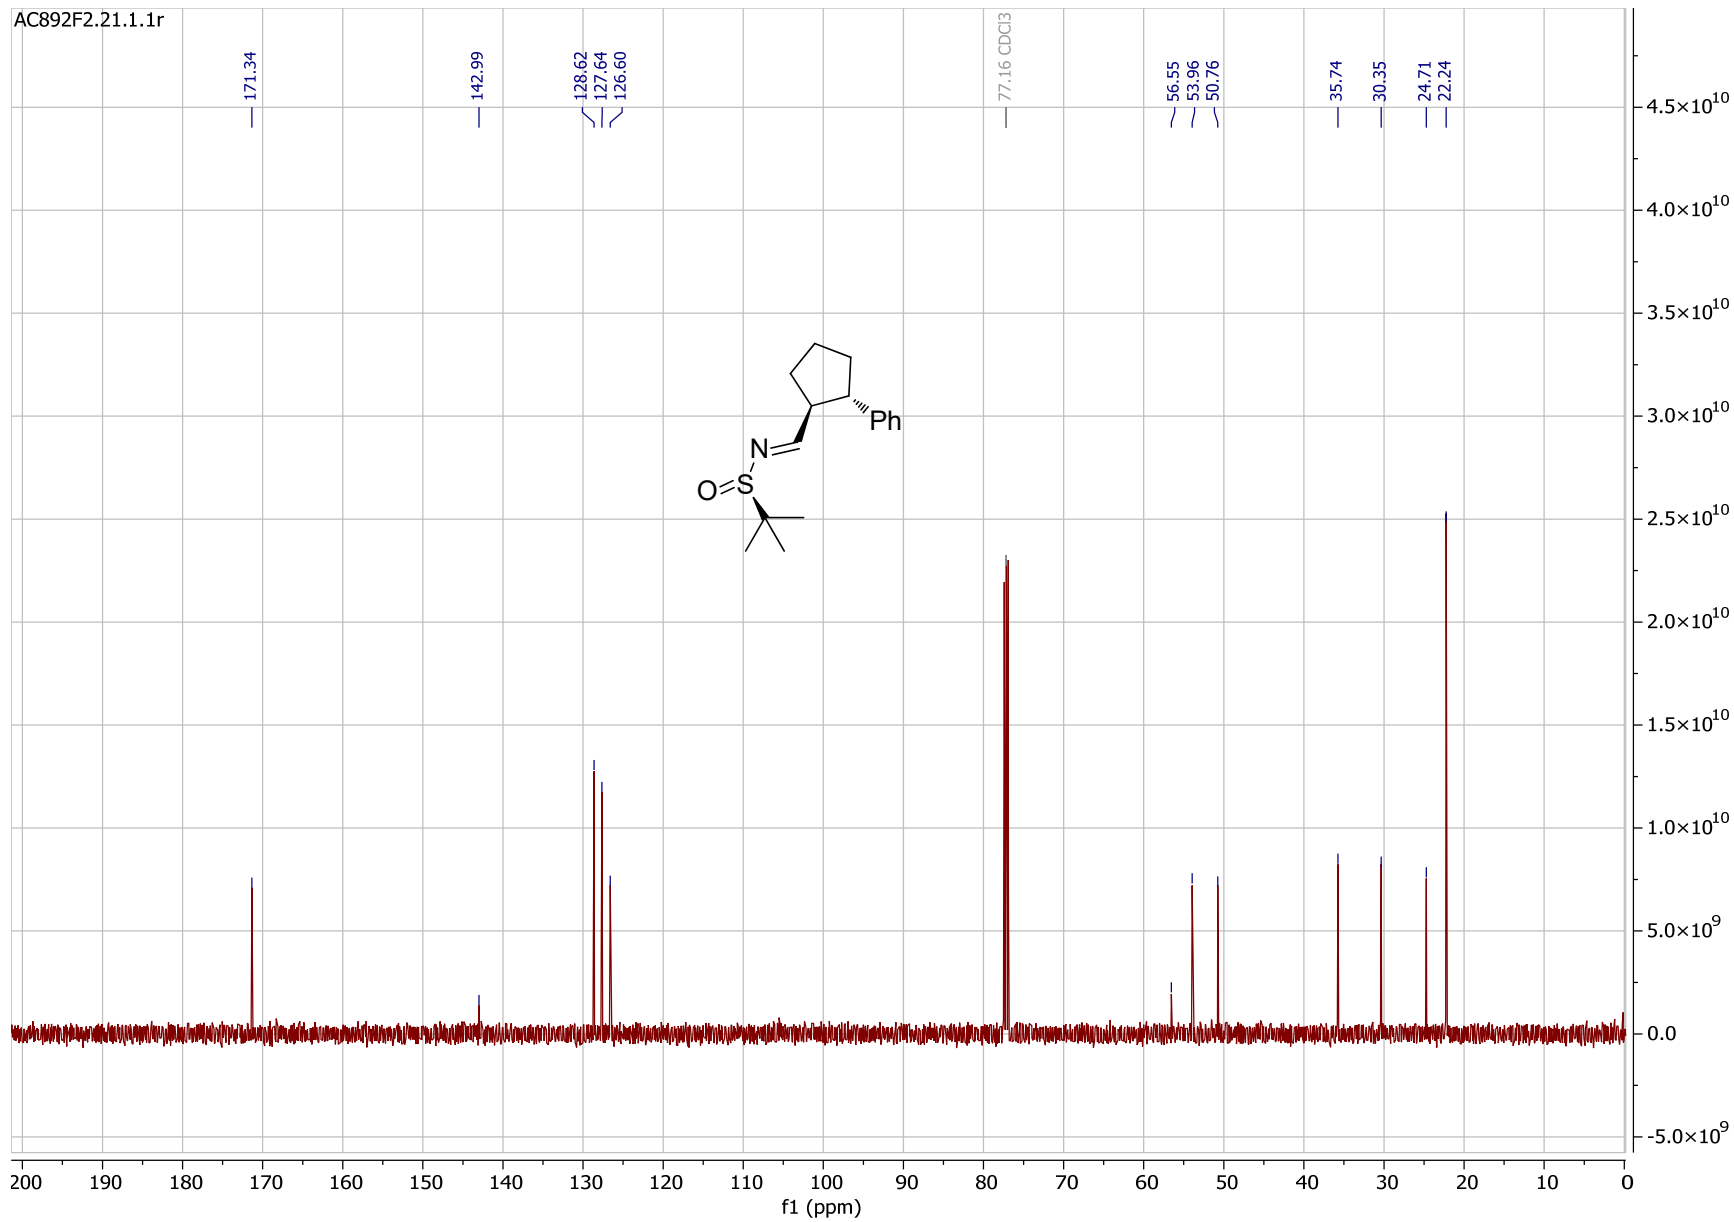



AC904prepF1.12.1.1r

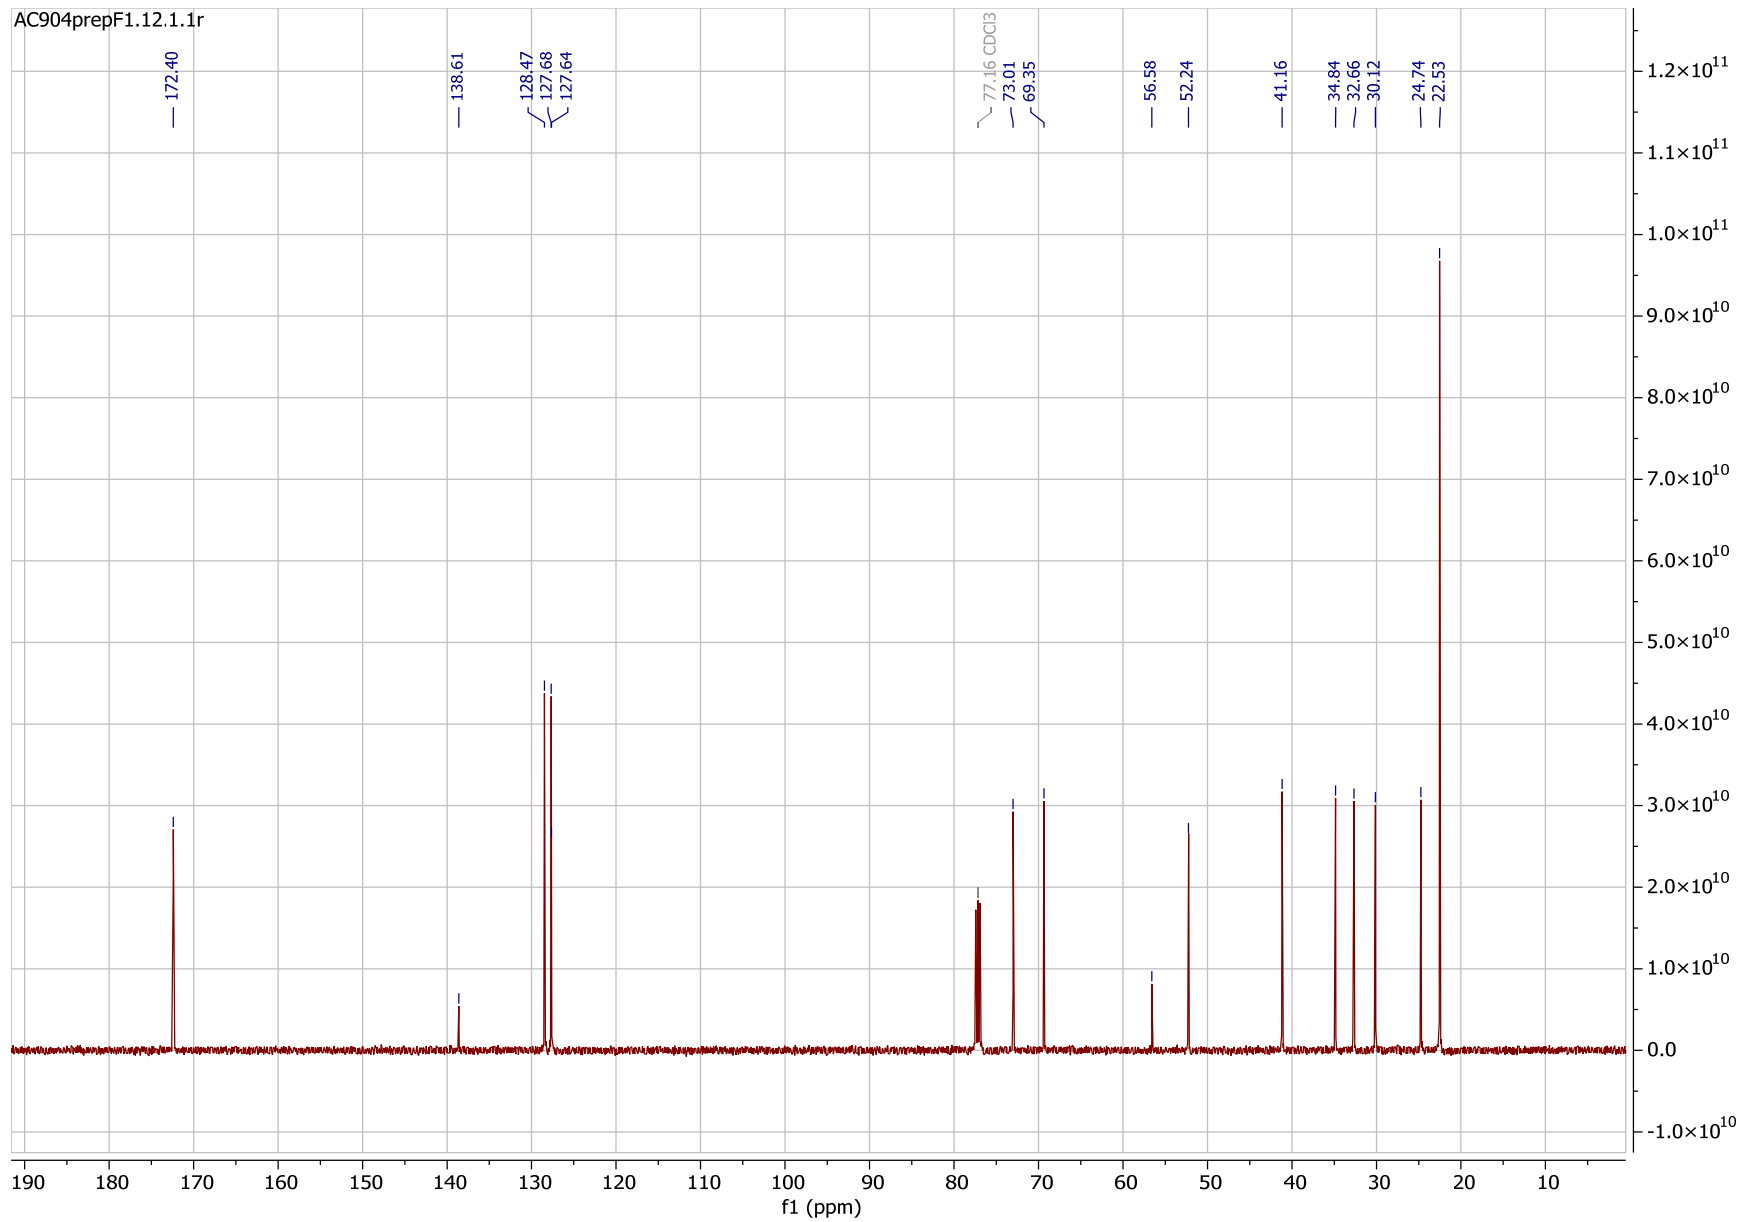

**(R)-2-Methyl-N-[(S)-1-[(1S,2S)-2-phenylcyclopentyl]ethyl]propane-2-sulfinamide 8a**

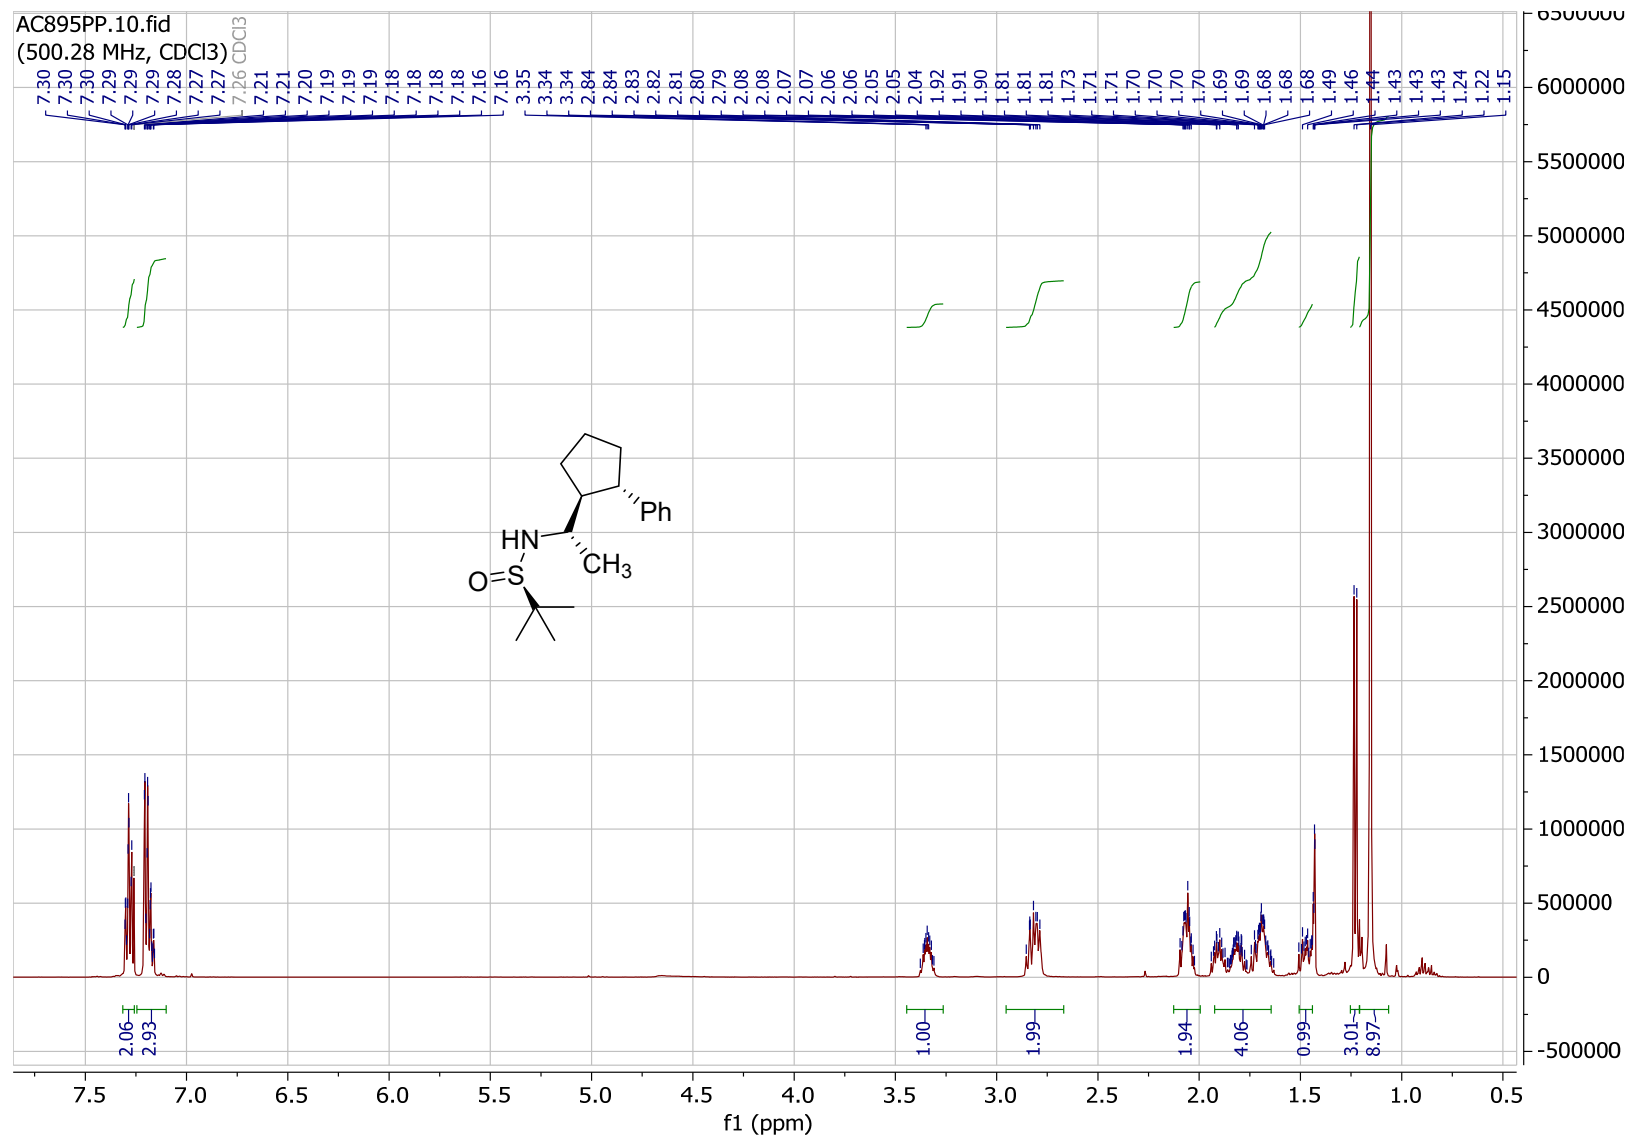

AC895PP.11.fid  
(125.81 MHz, CDCl<sub>3</sub>)

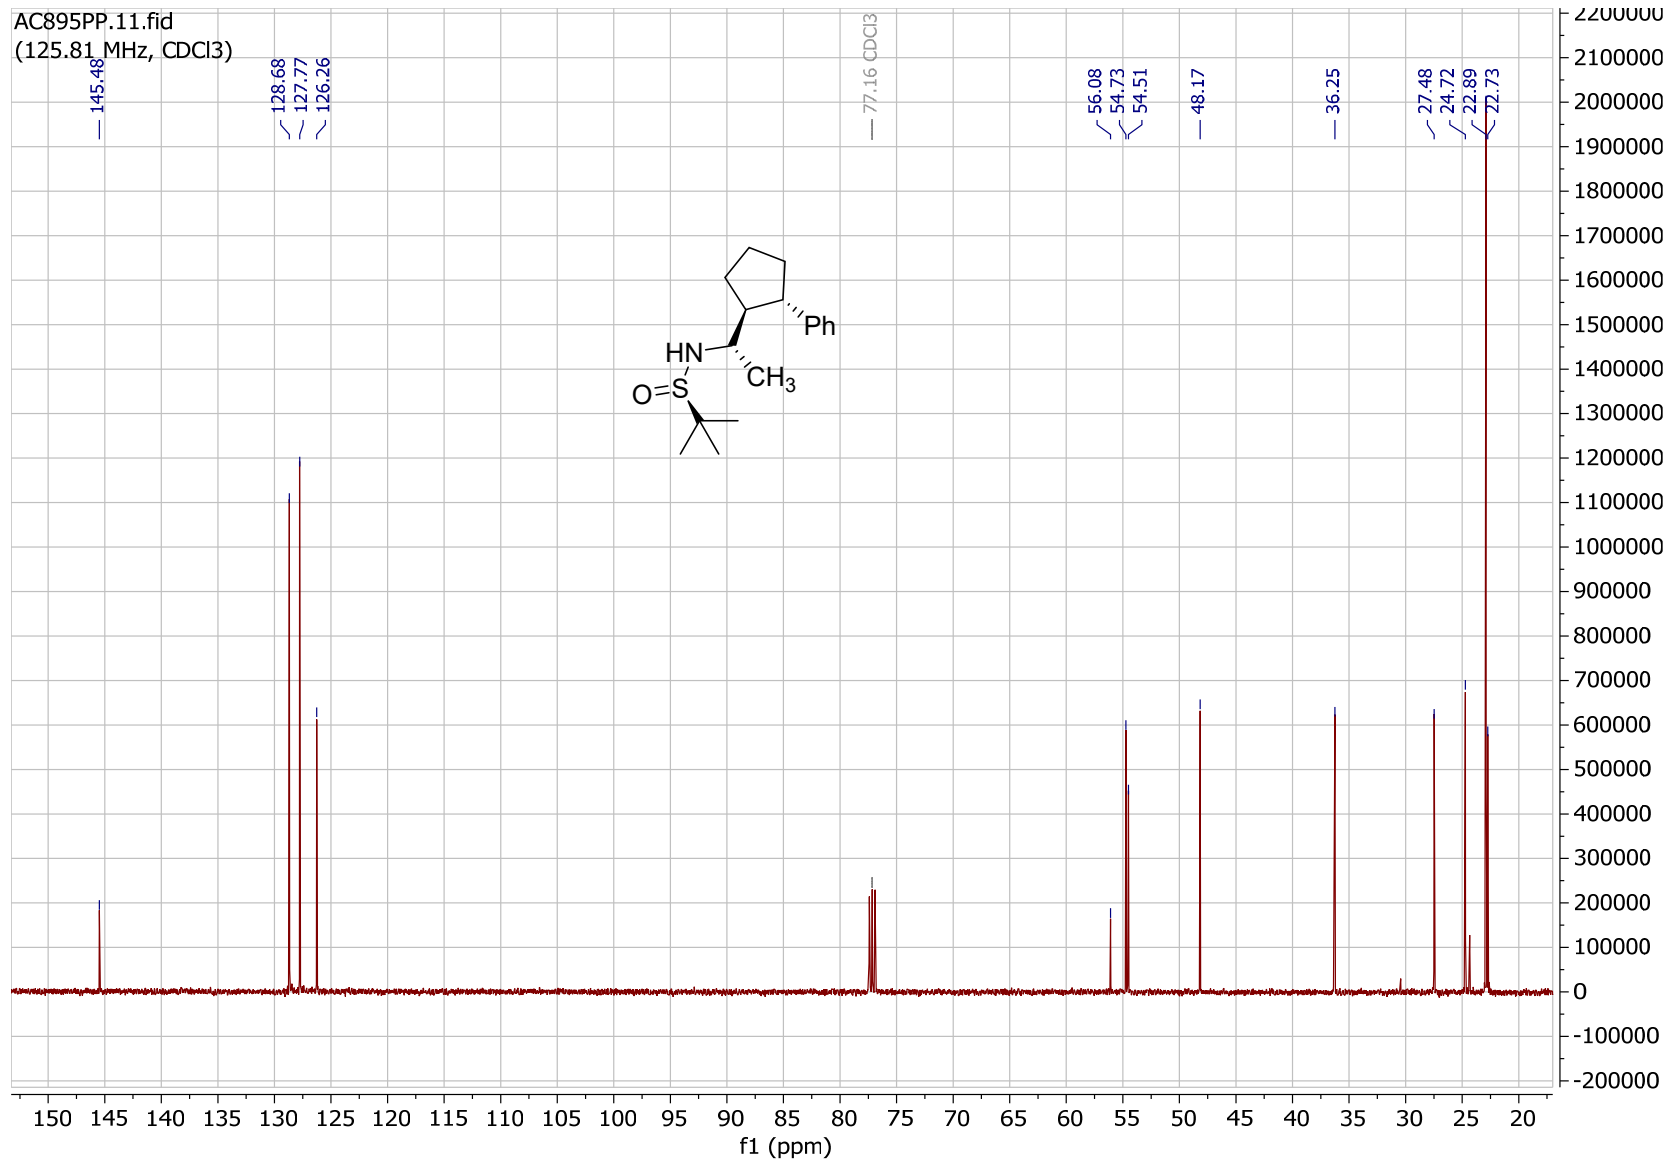



(S)-N-((S)-1-((1S,2R)-2-[2-(Benzyloxy)ethyl]cyclopentyl)ethyl)-2-methylpropane-2-sulfinamide 8l

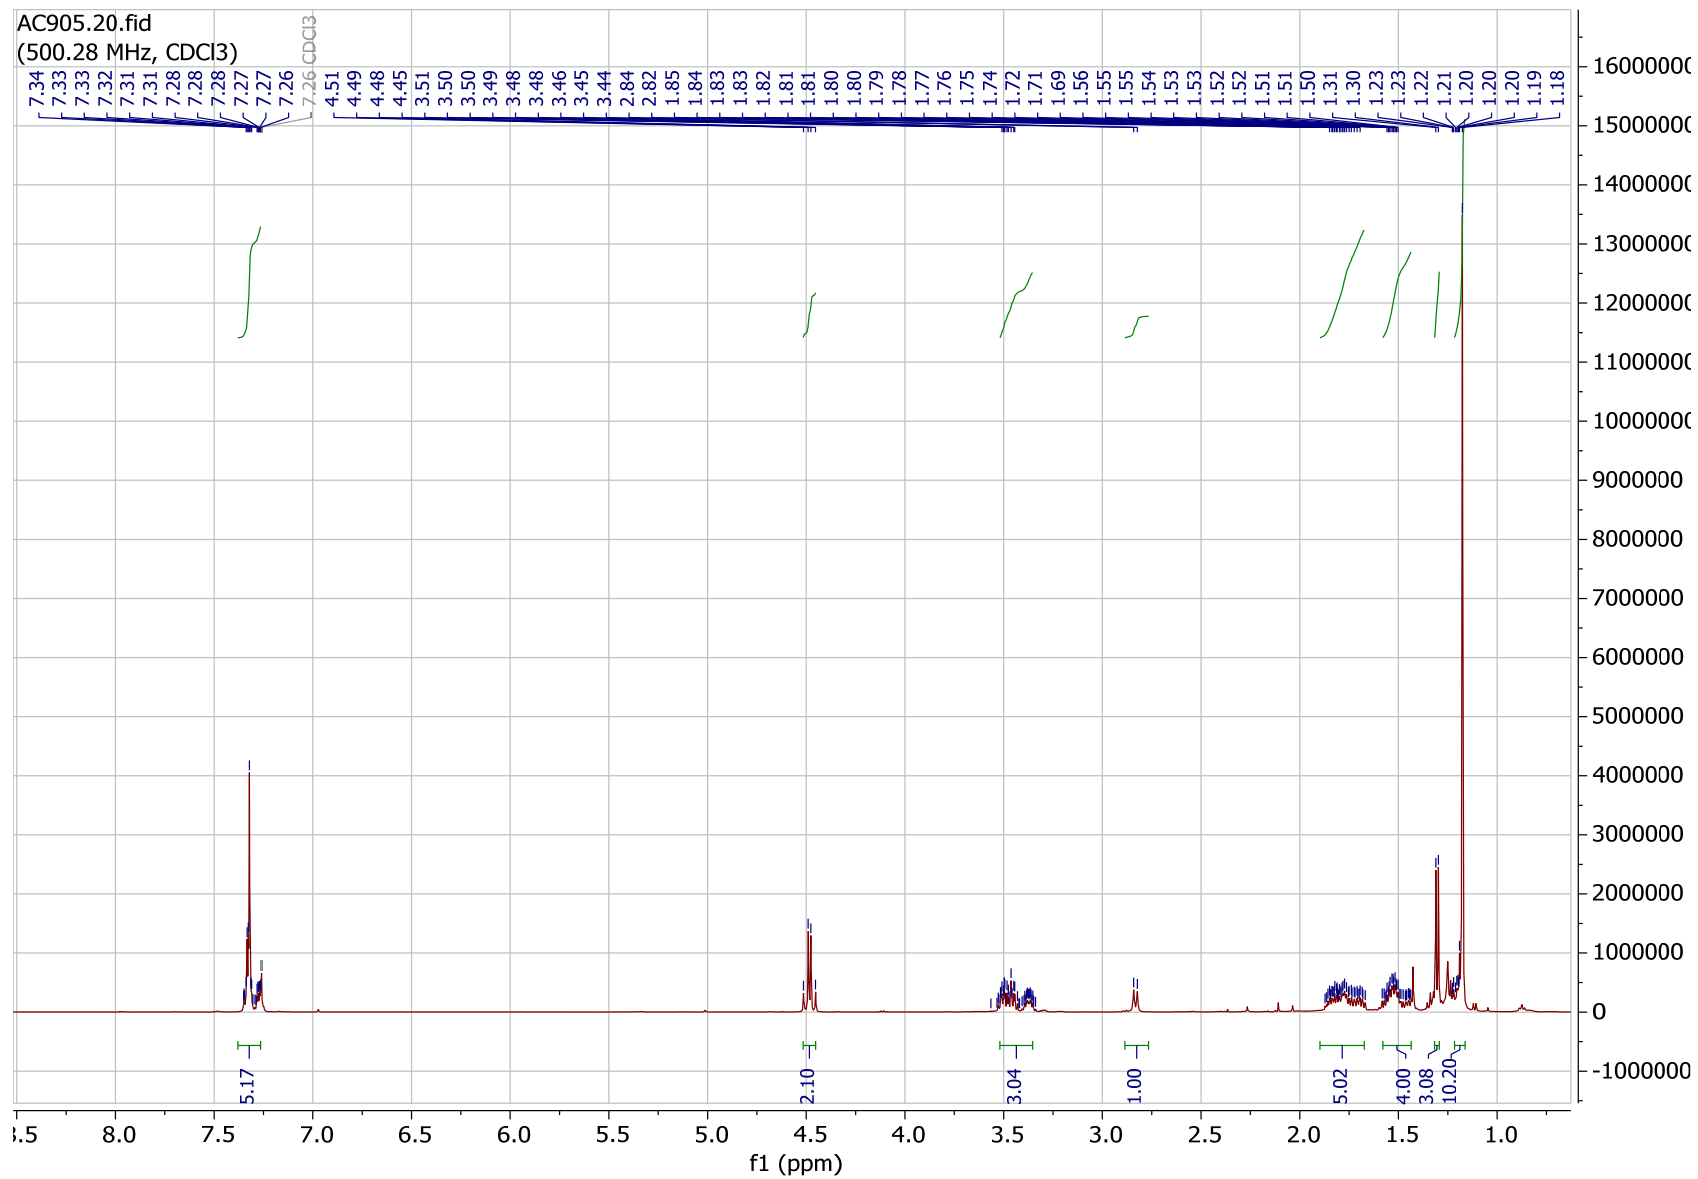

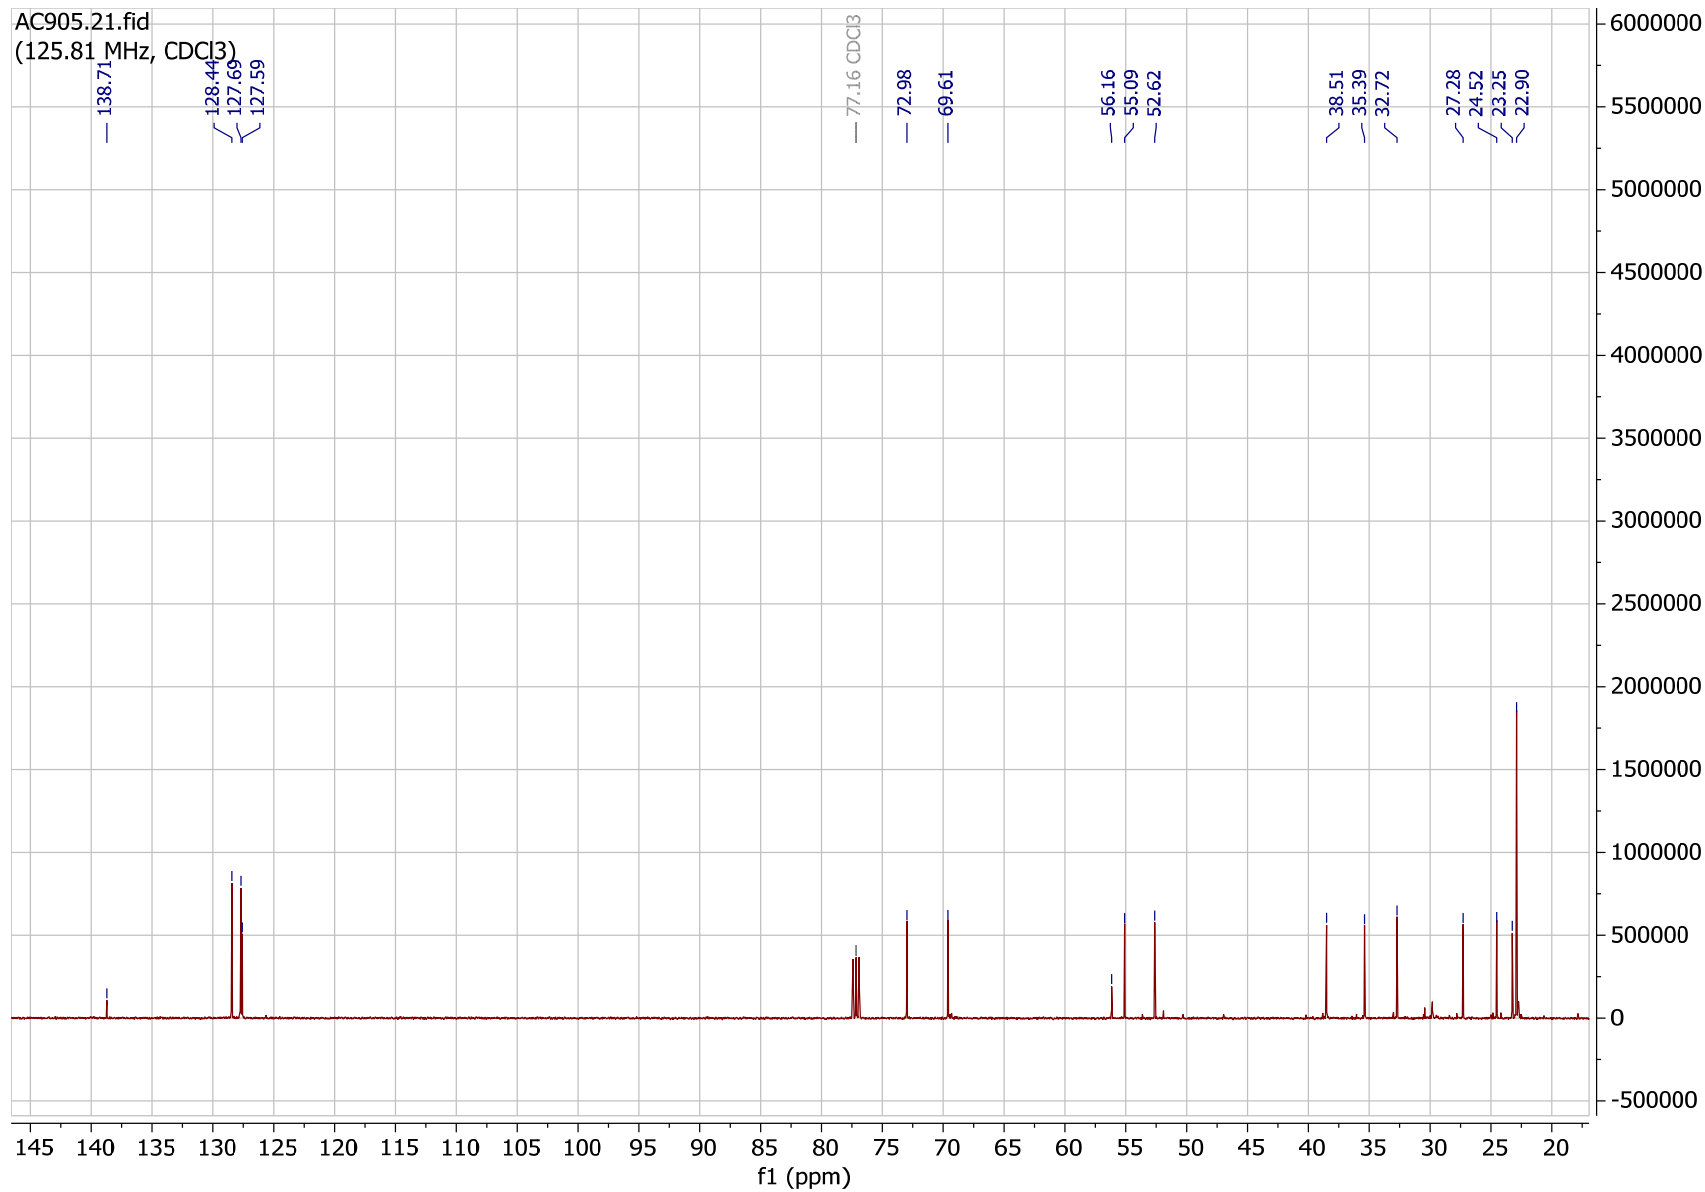

Ethyl 4-benzyl-4,5,6,7-tetrahydro-[1,2,3]triazolo[1,5-a]pyridine-3-carboxylate 9

AC843P.10.fid

(500.28 MHz, CDCl<sub>3</sub>)

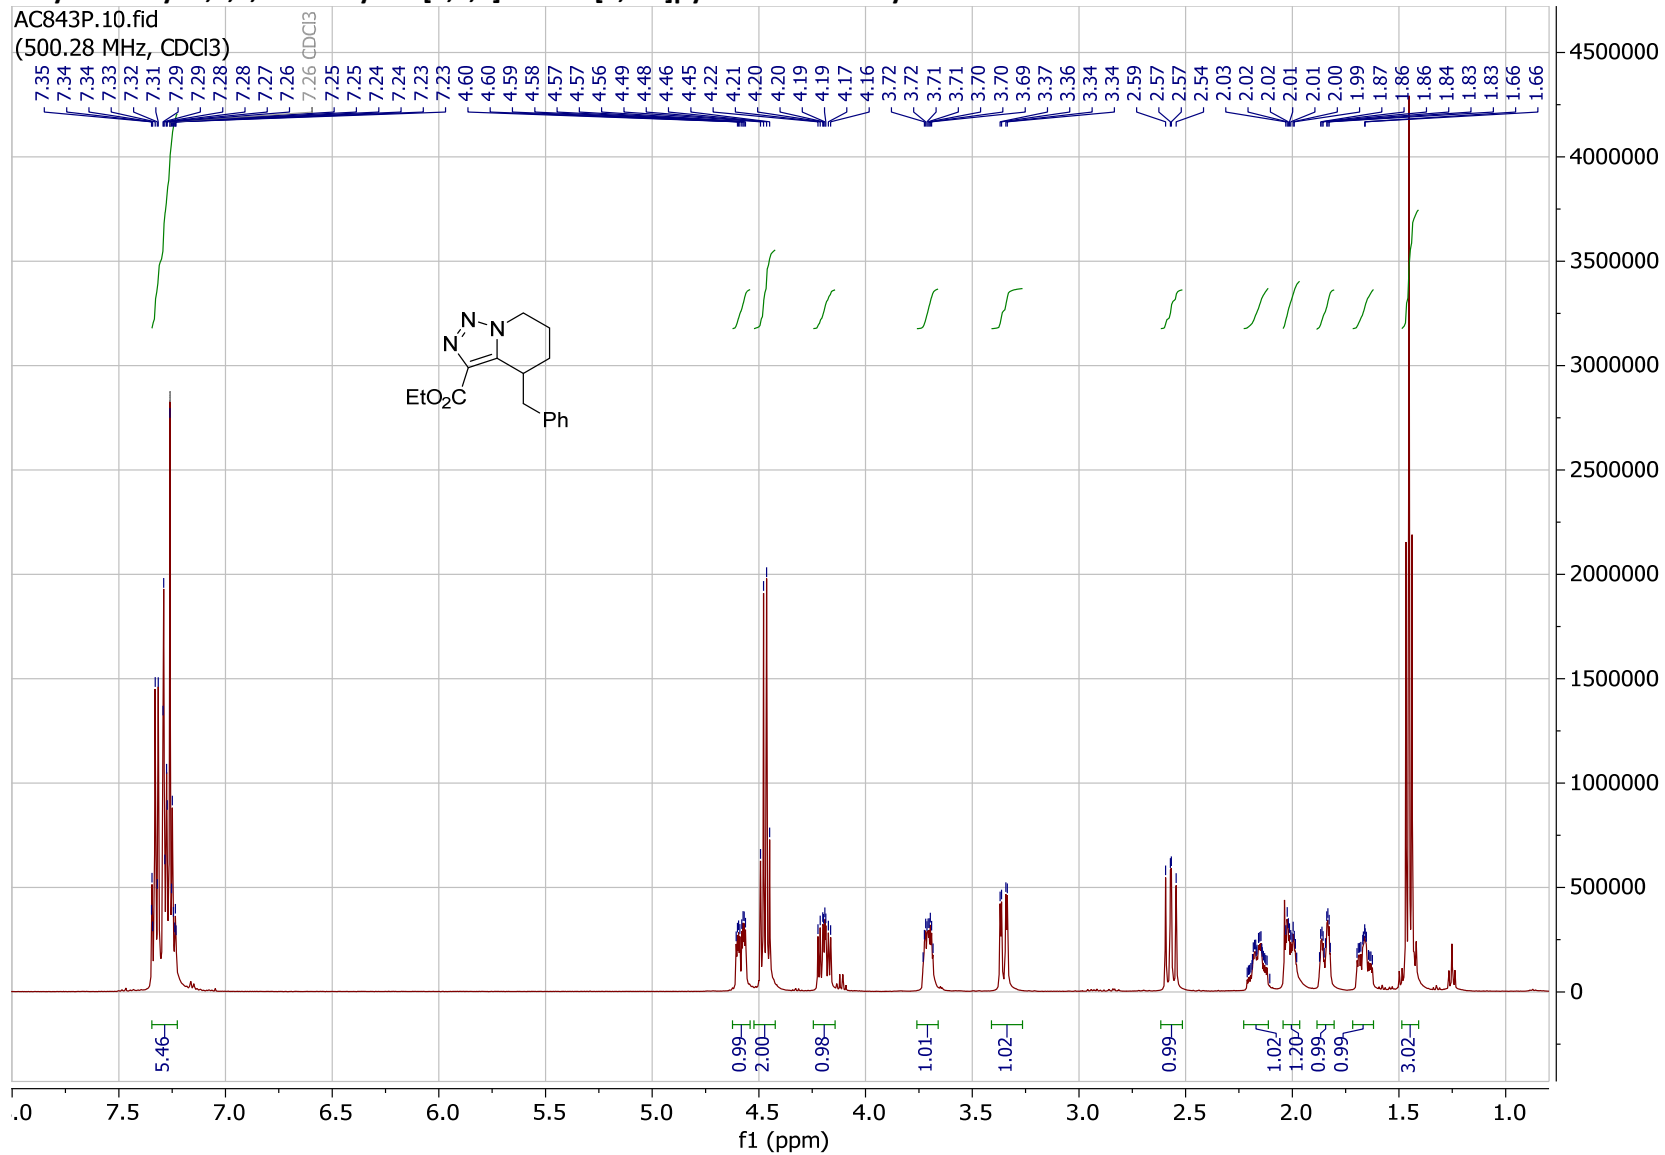

AC843P.11.fid  
(125.81 MHz, CDCl<sub>3</sub>)

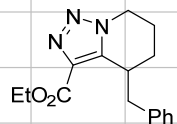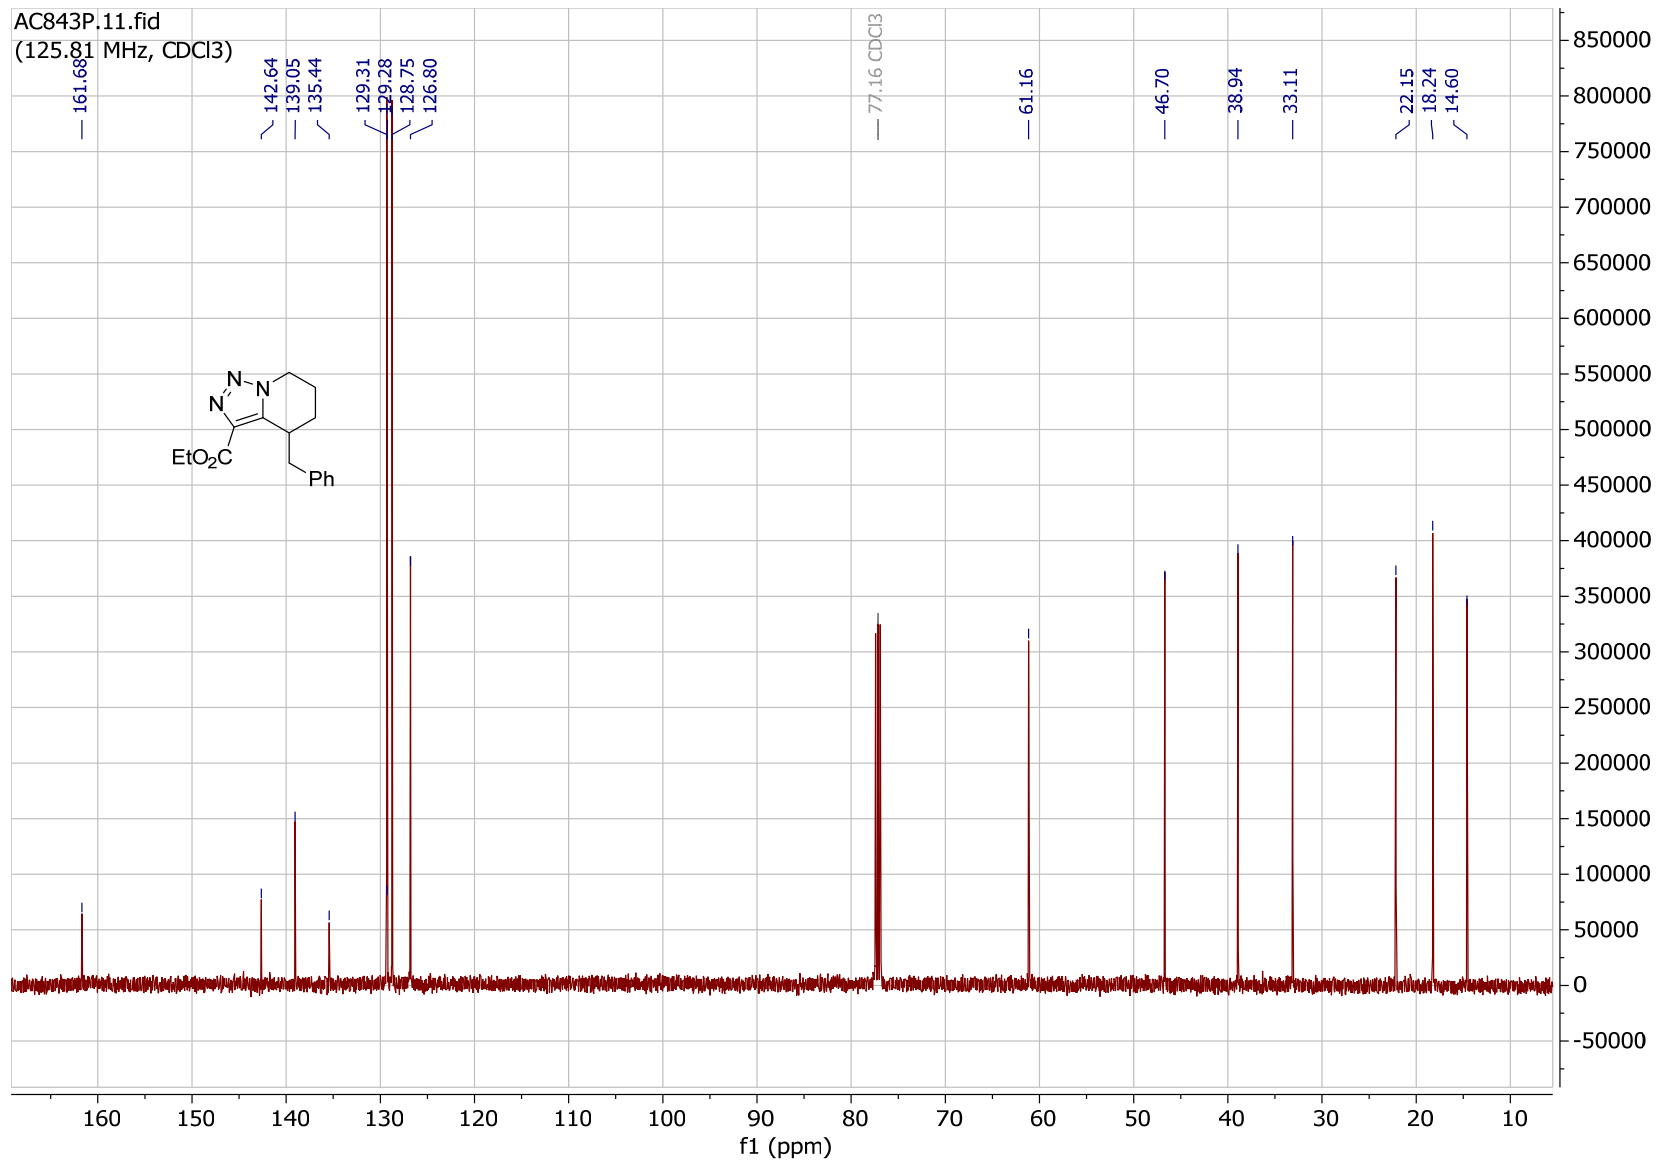

# 5-Azido-2-benzylpentanal 10

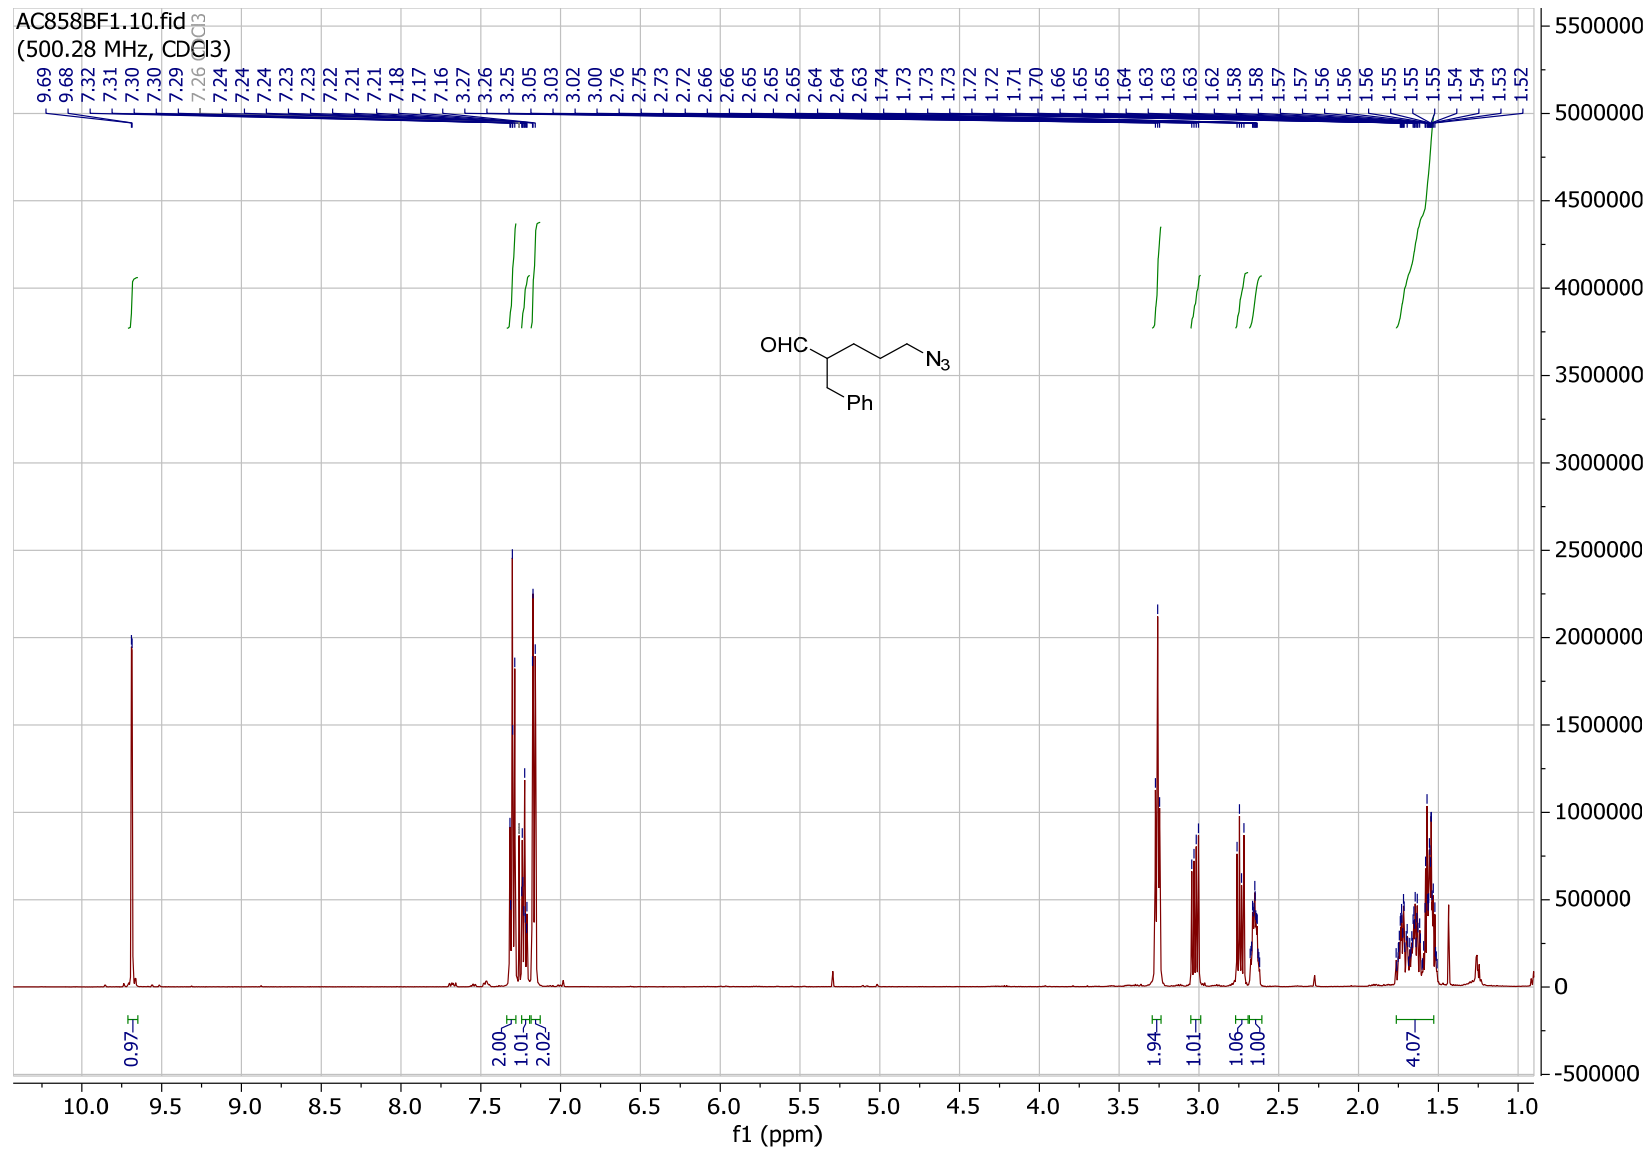

AC858BF1.11.fid  
(125.81 MHz, CDCl<sub>3</sub>)

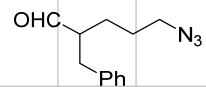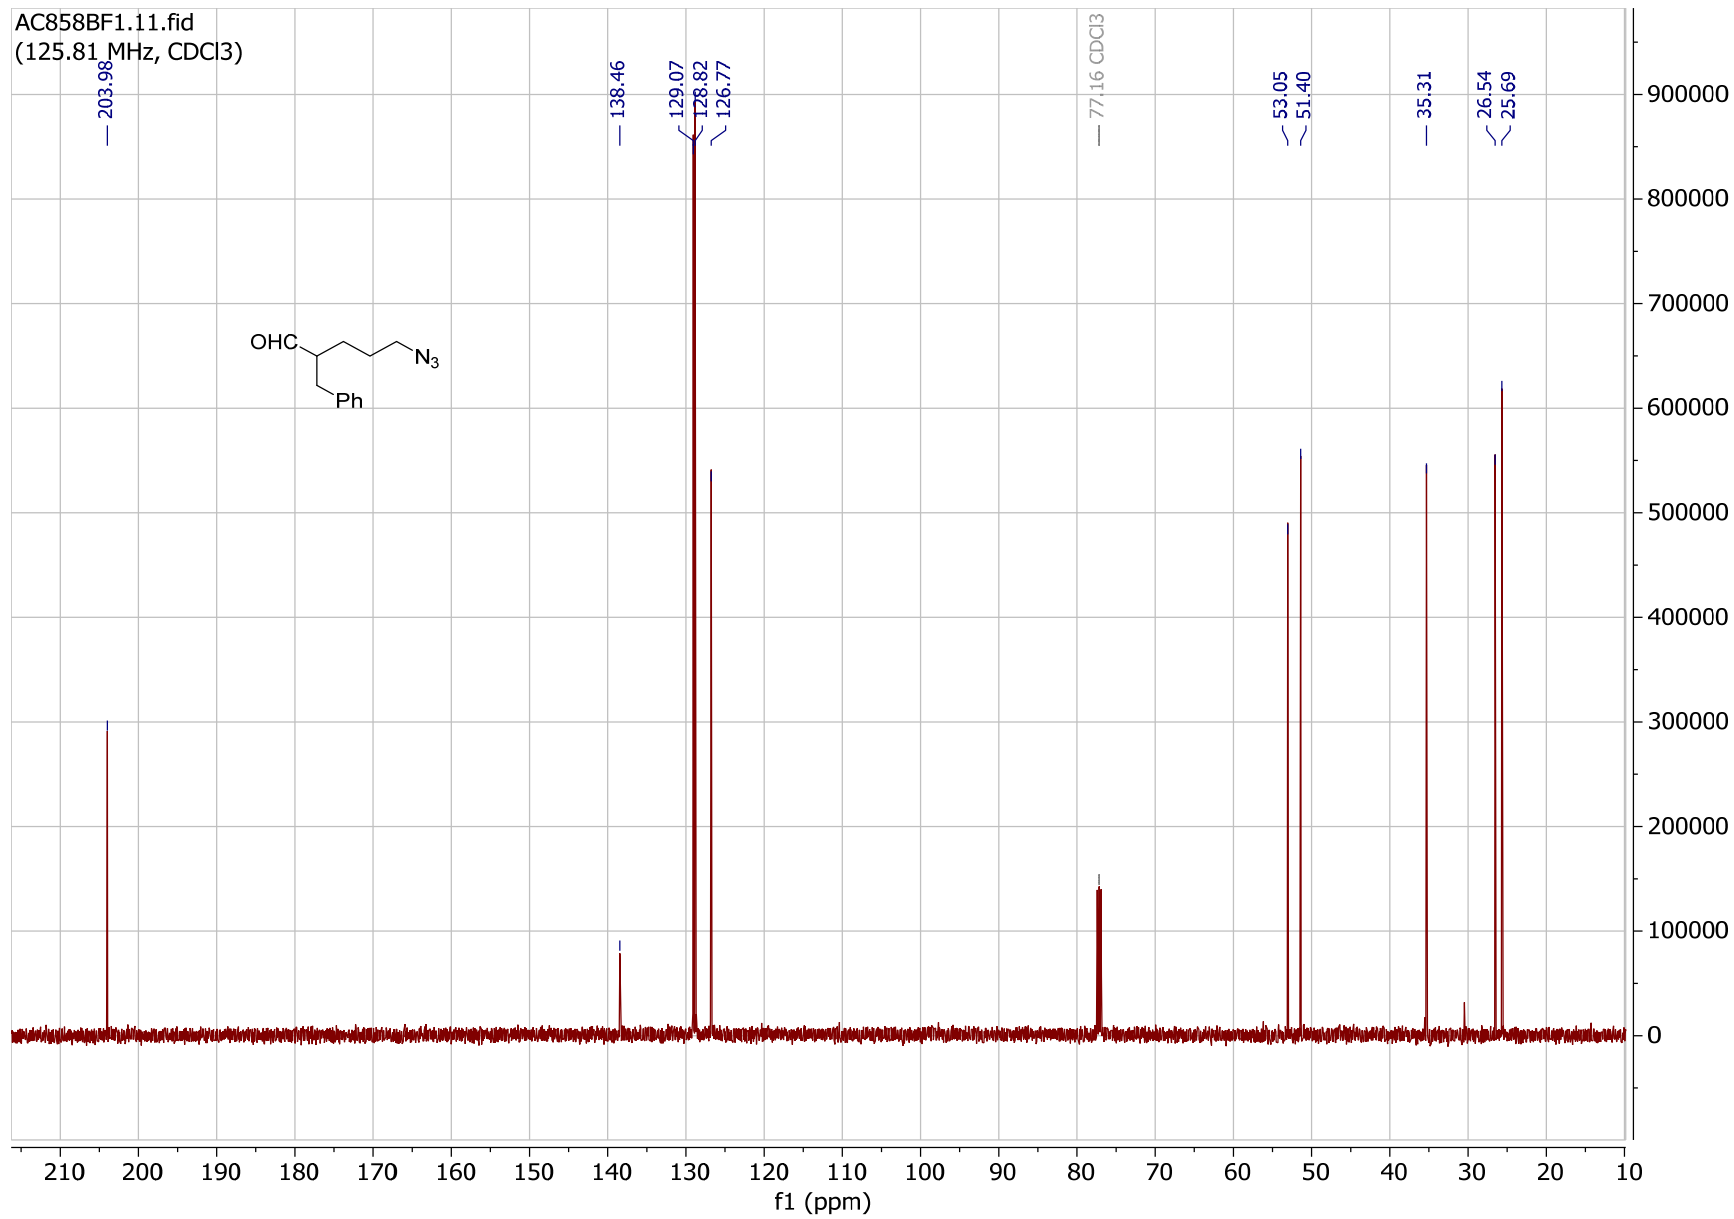

# Ethyl (E)-7-azido-4-benzylhept-2-enoate 11

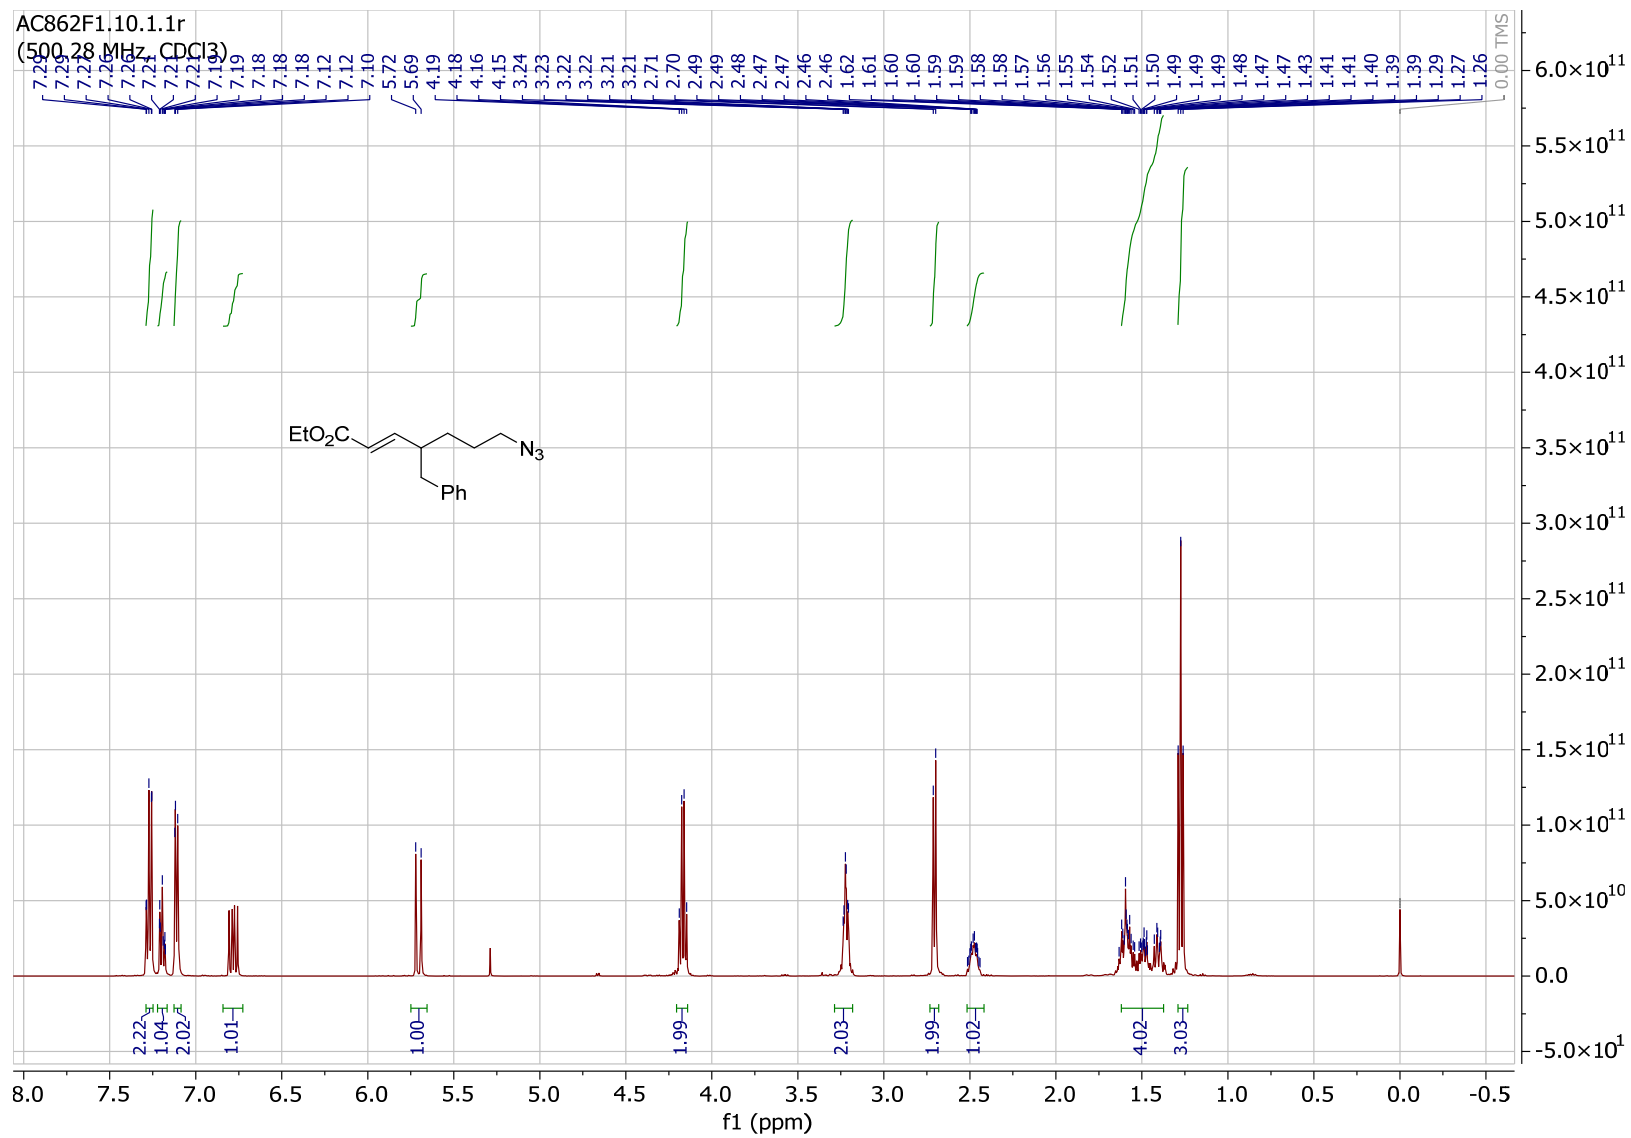

AC862F1.11.fid  
(125.81 MHz, CDCl3)

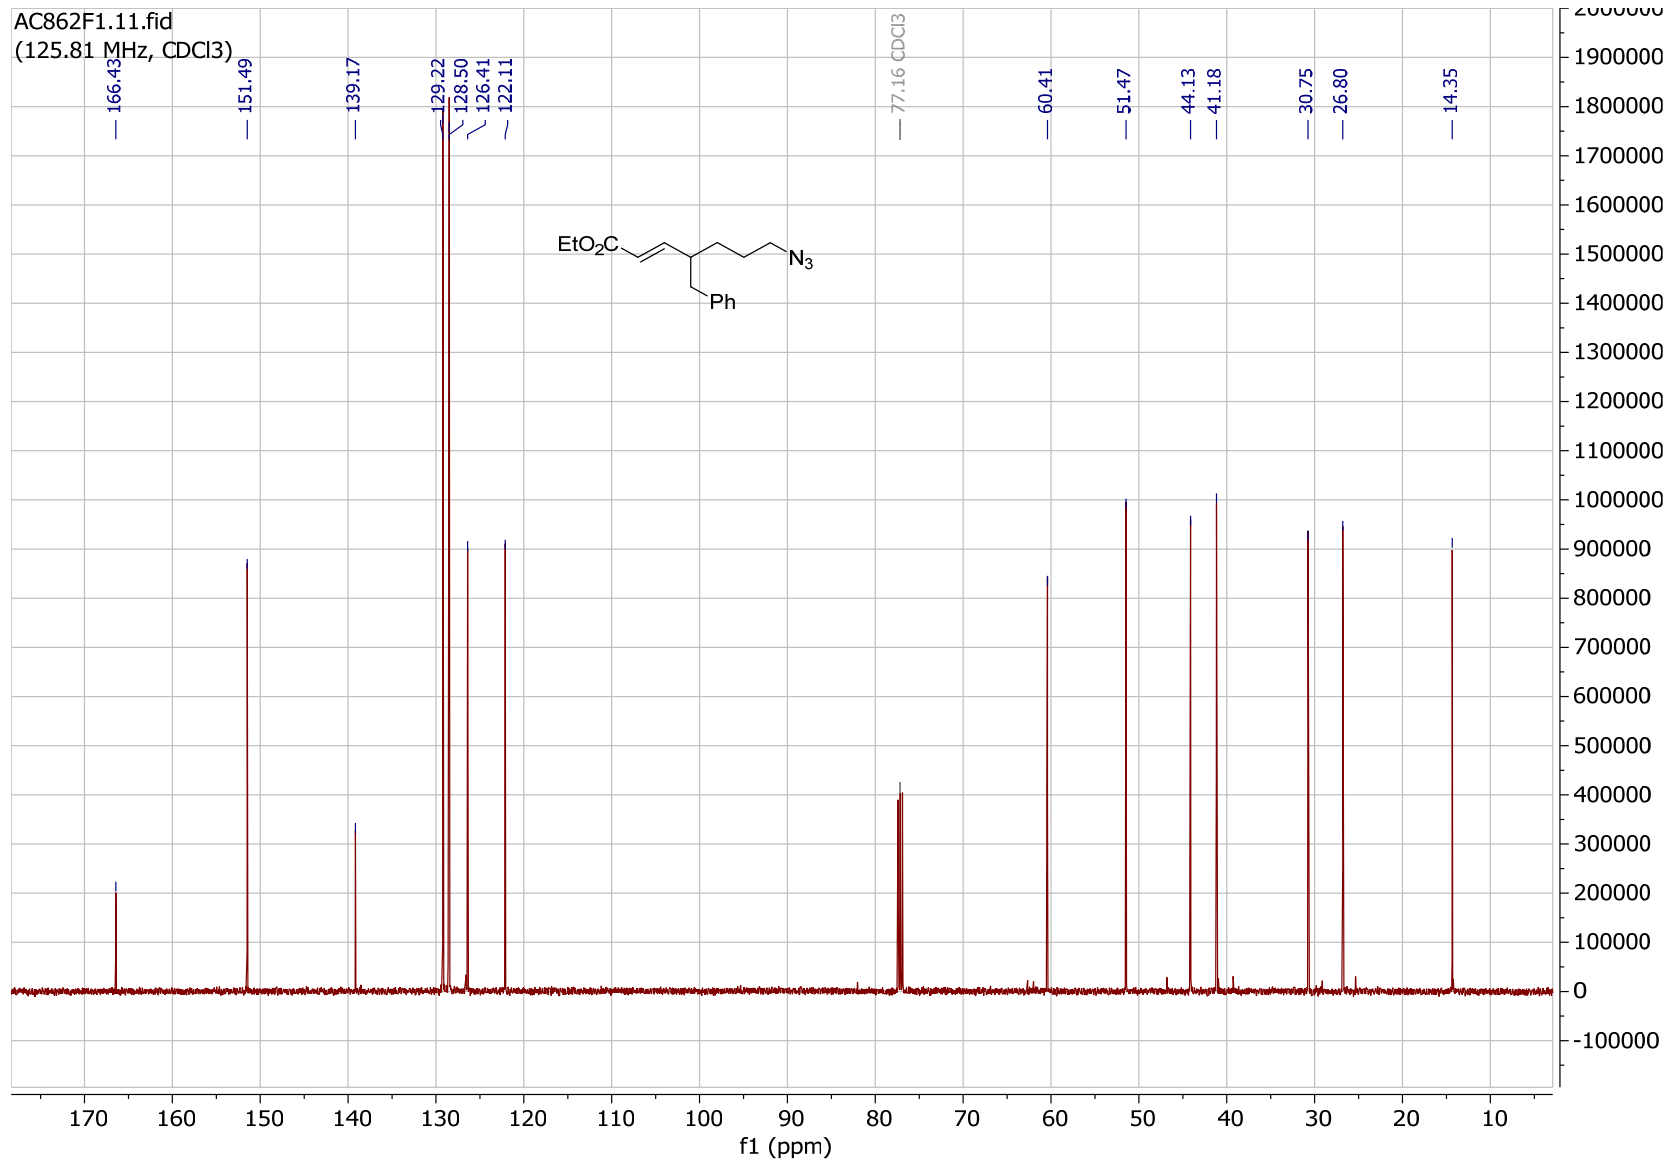



# Ethyl 3-benzylpiperidine-2-carboxylate 12

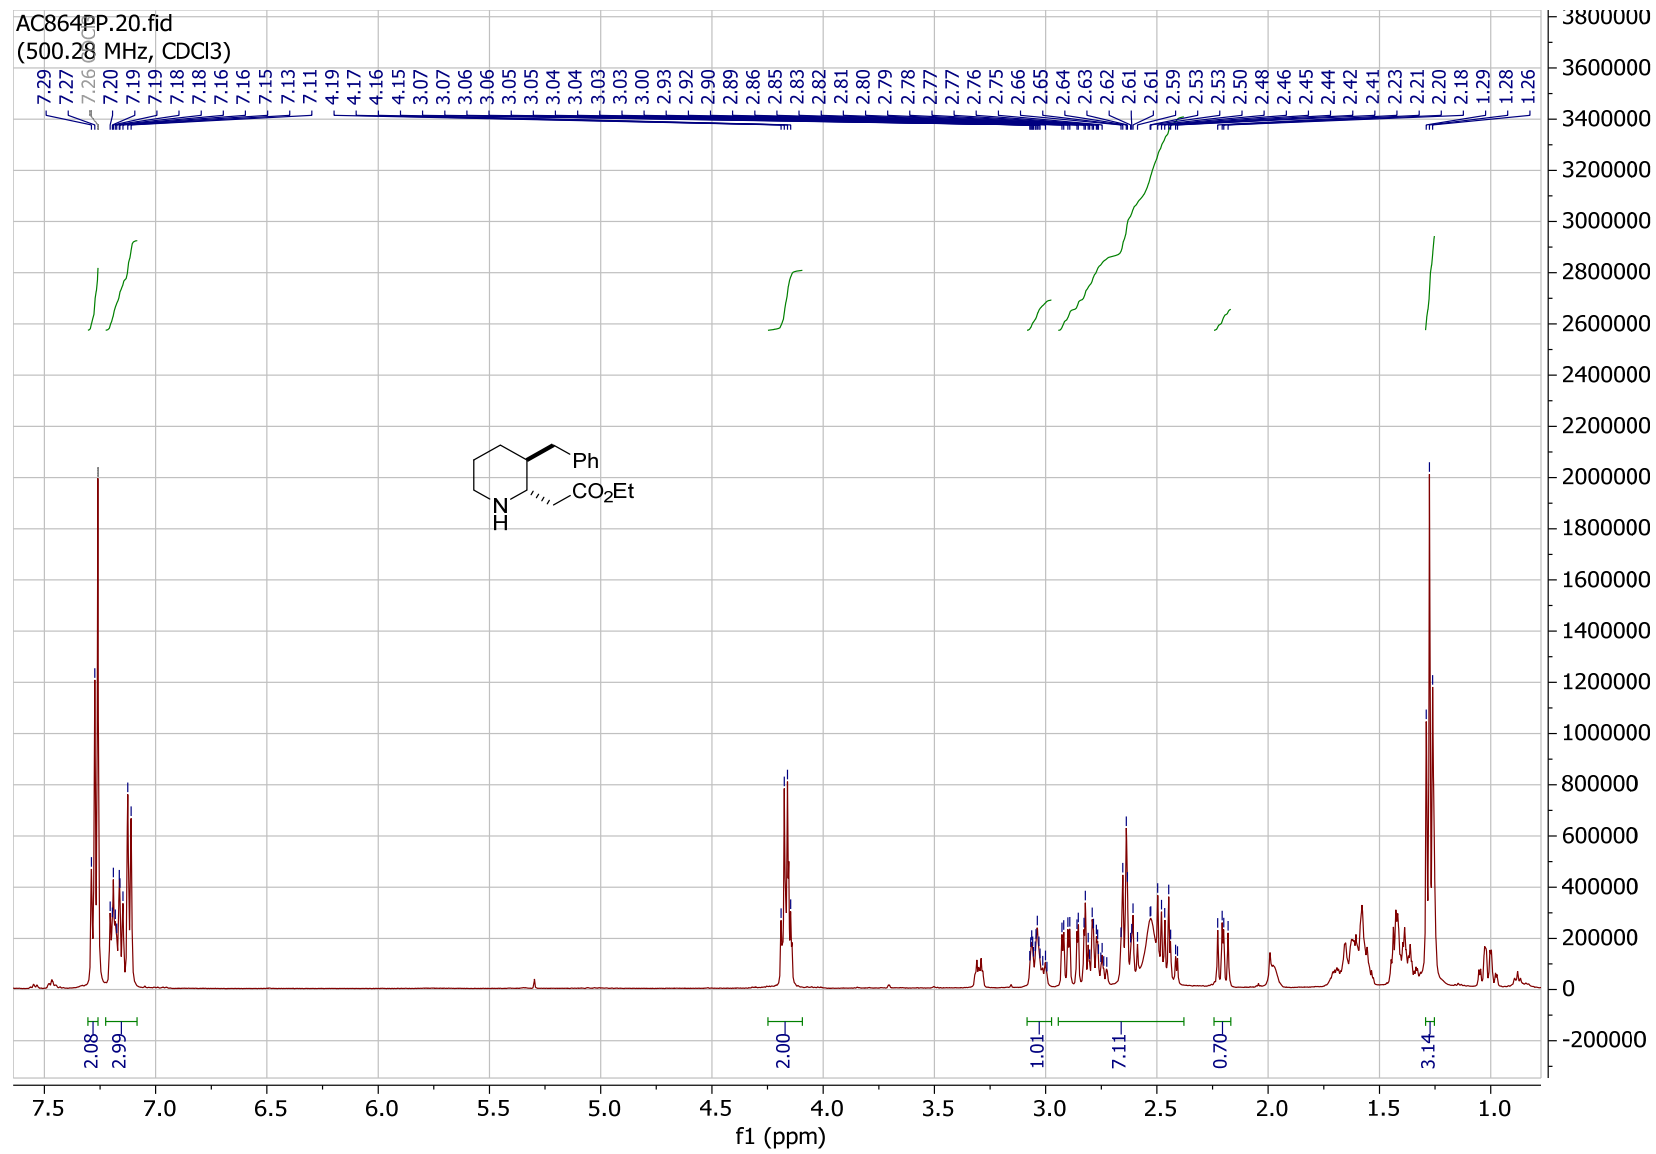

AC864PP.30.fid  
(125.81 MHz, CDCl<sub>3</sub>)

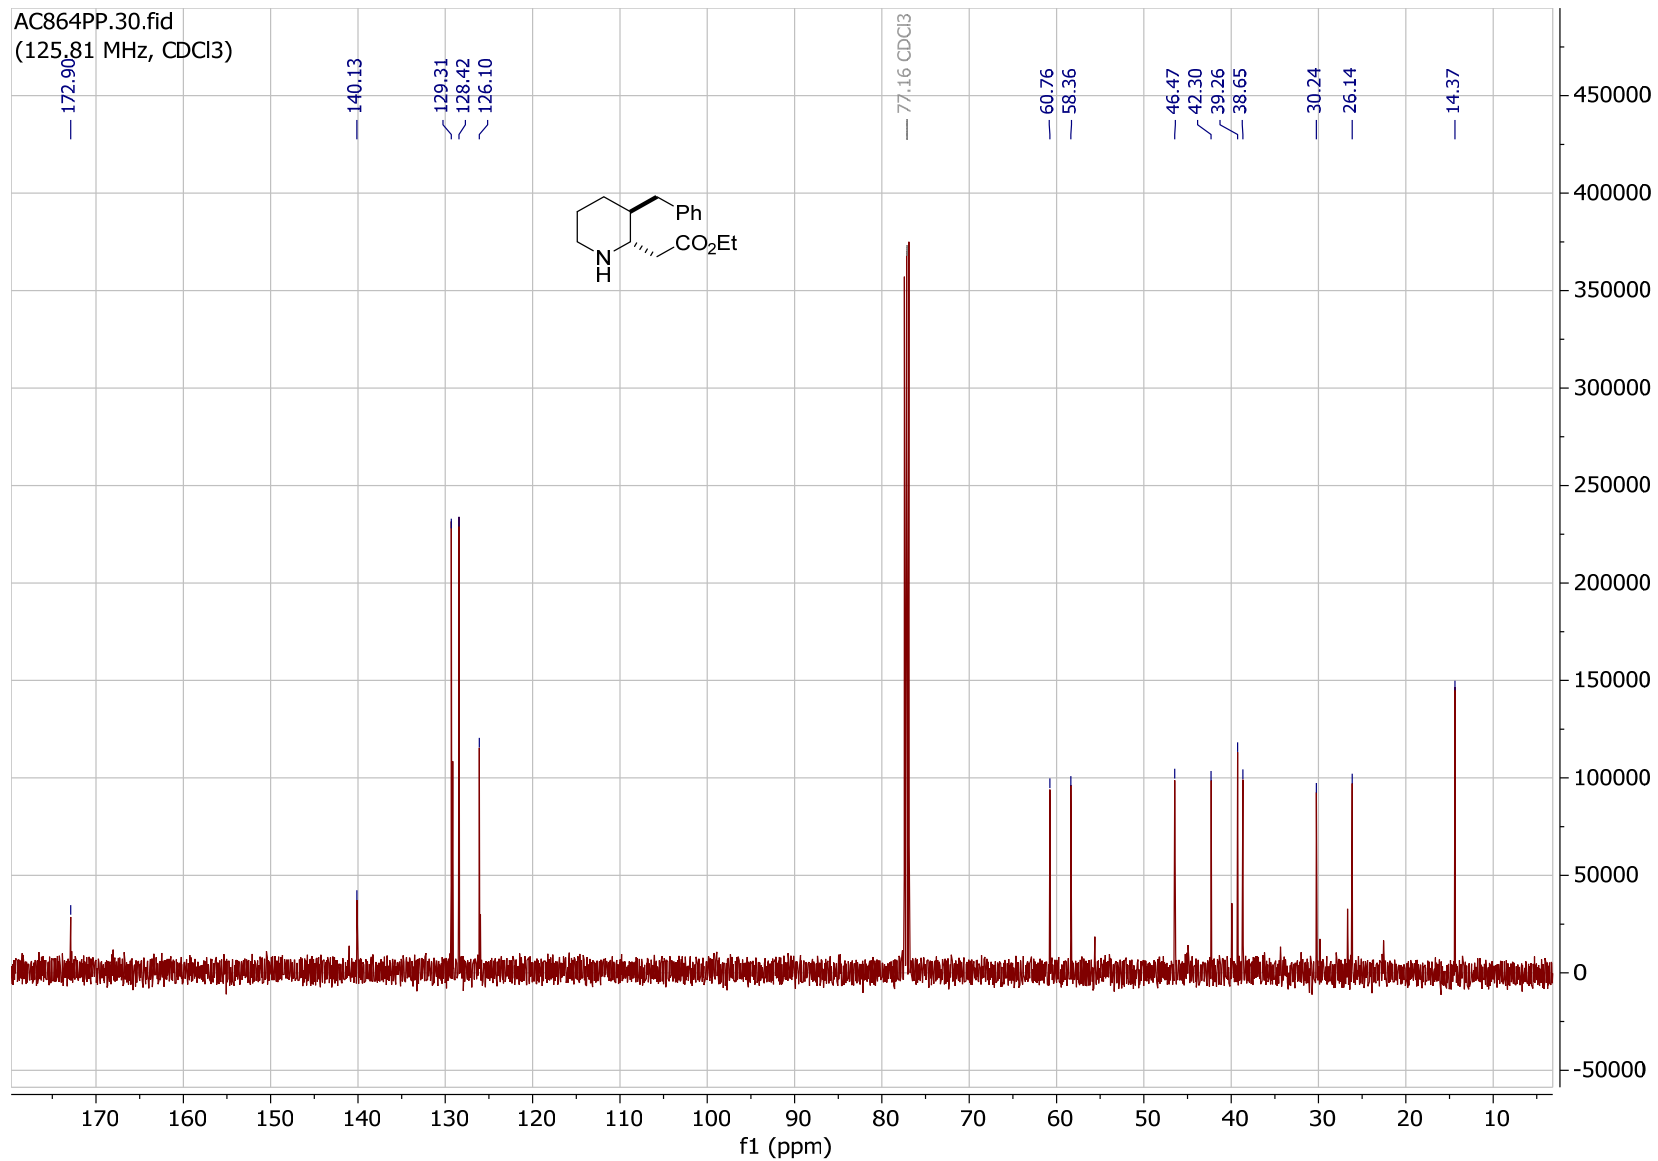

**(R)-N-[(S,E)-2-Benzyl-5-bromopentylidene]-2-methylpropane-2-sulfinamide 13**

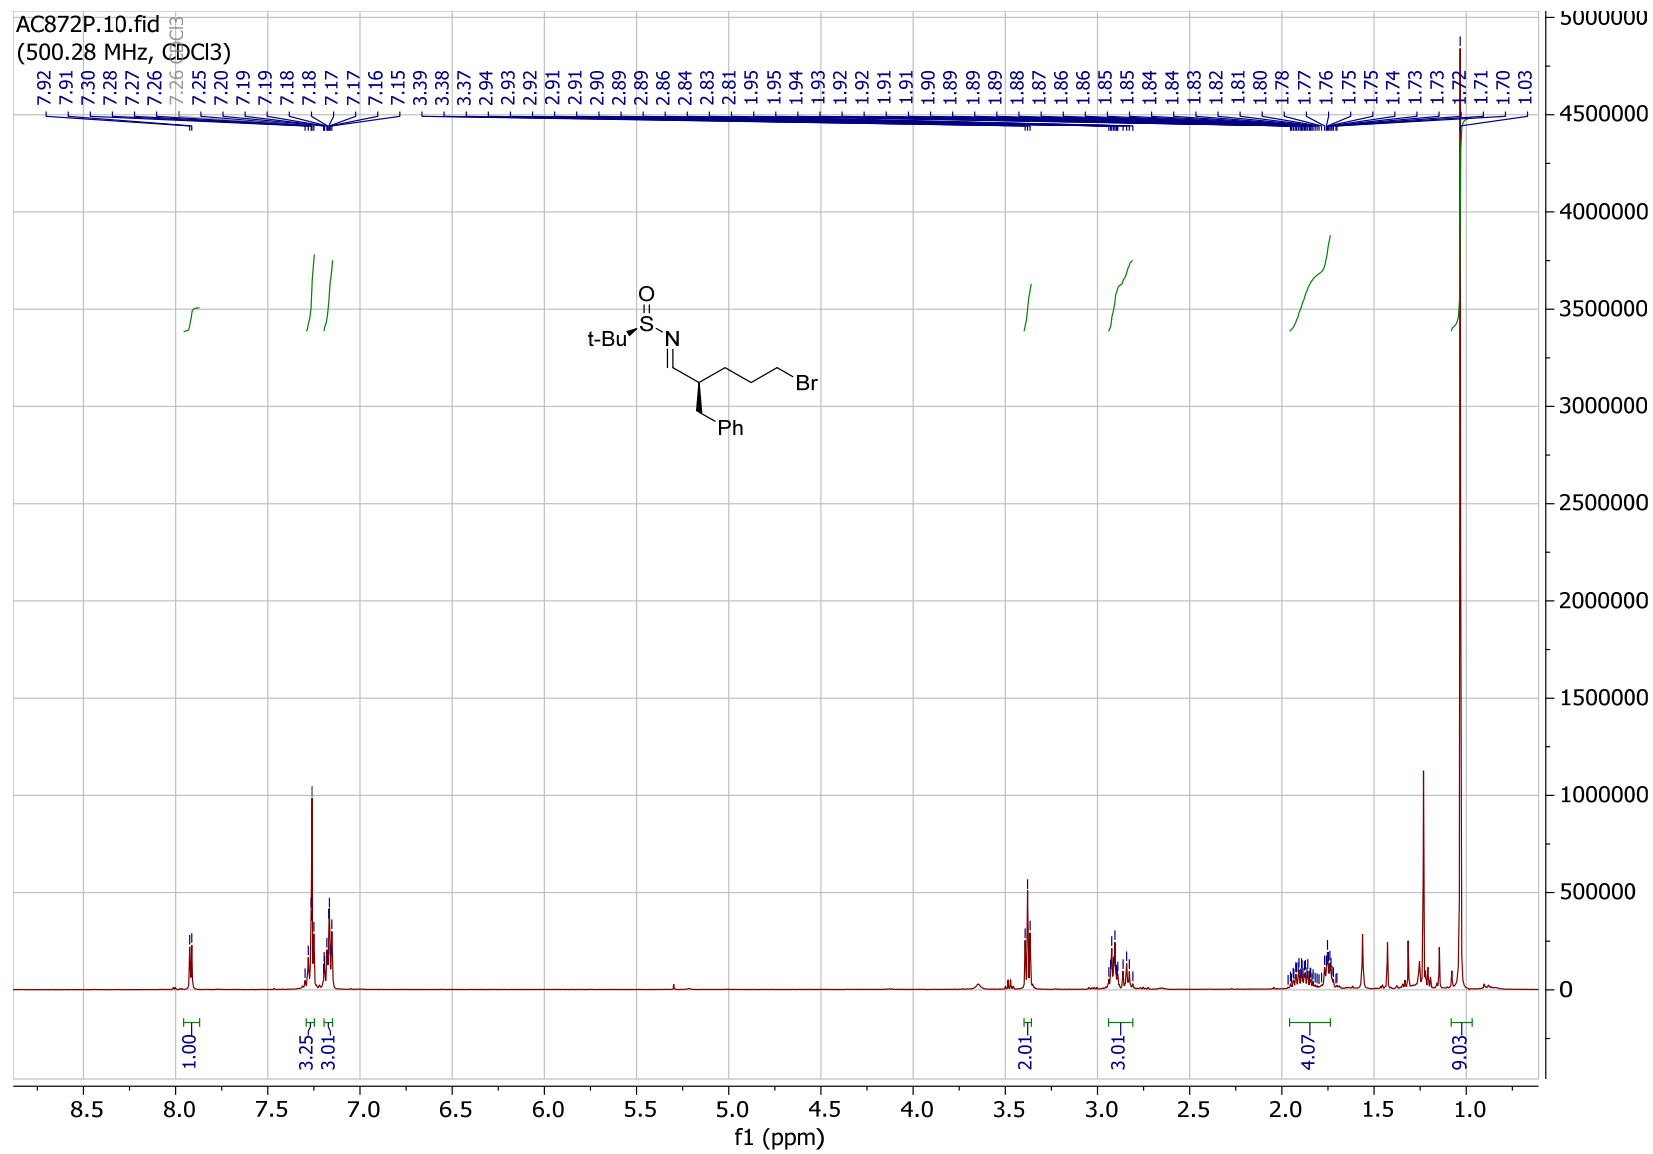

AC872P.11.fid  
(125.81 MHz, CDCl<sub>3</sub>)

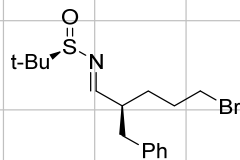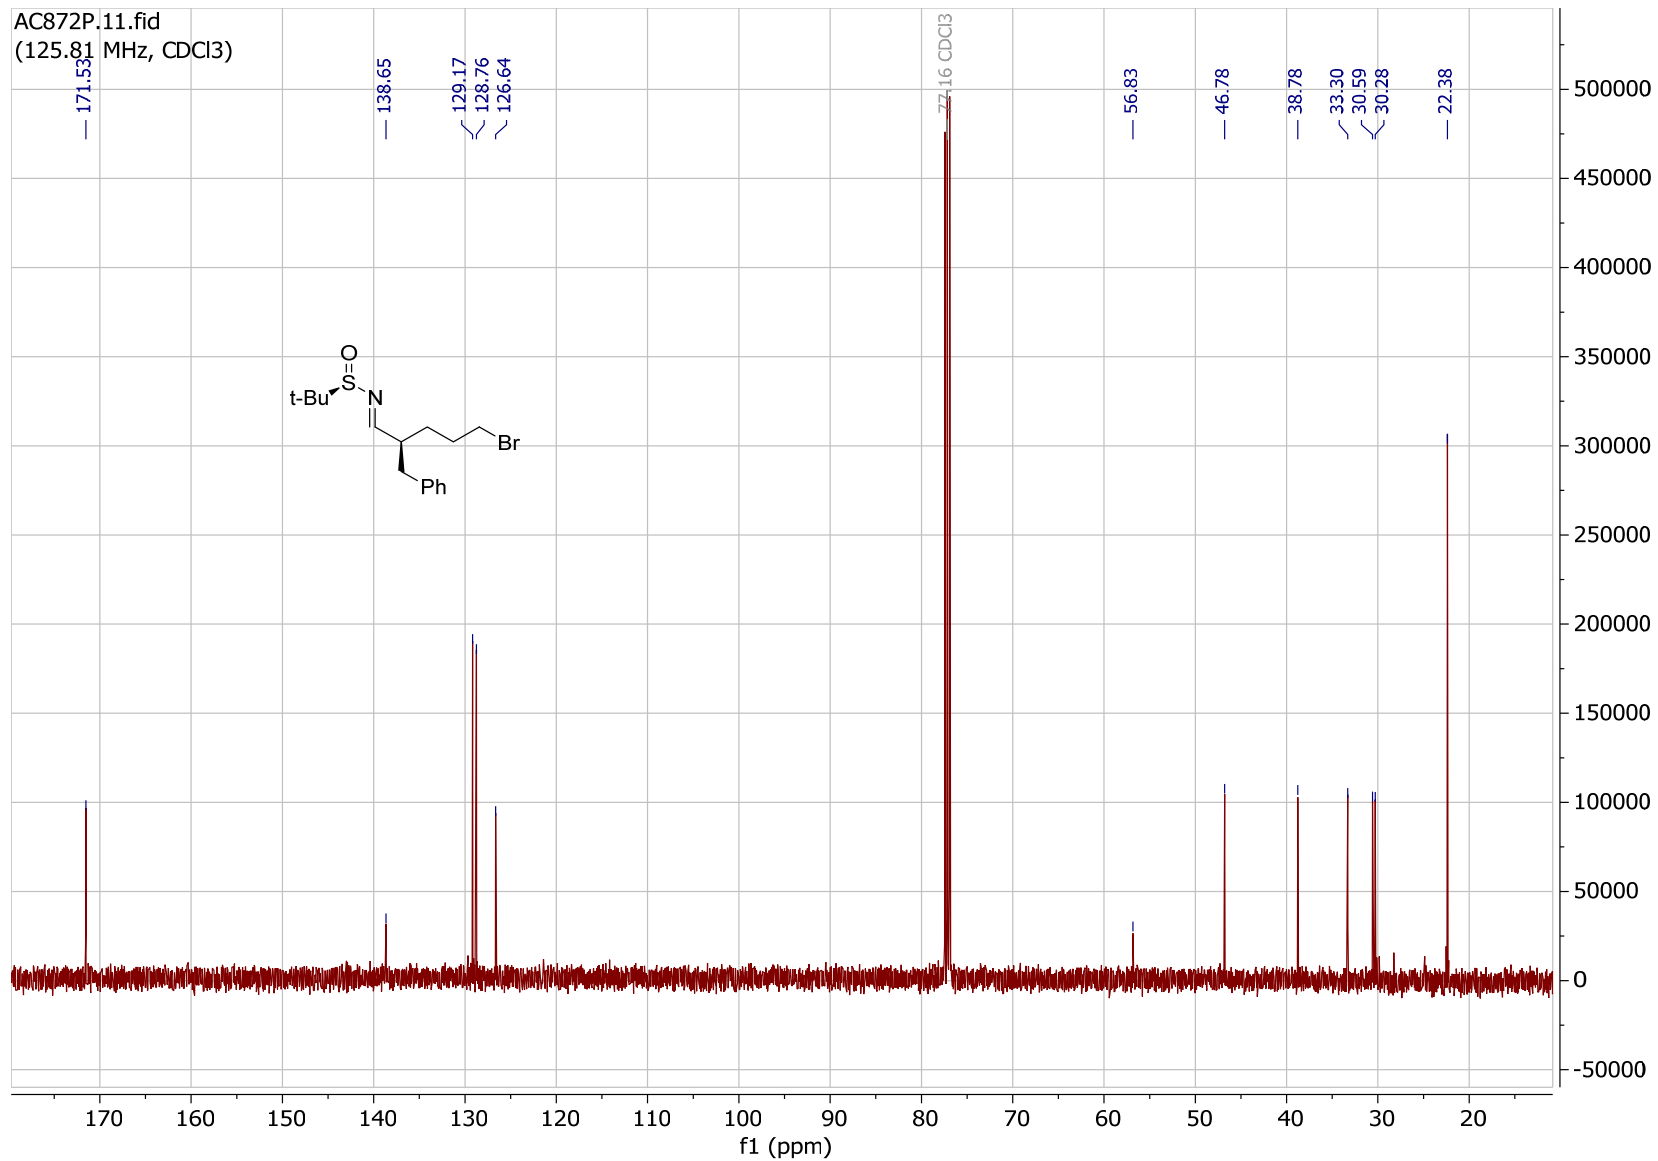

**(R)-N-[(2S,3S)-3-Benzyl-6-bromohexan-2-yl]-2-methylpropane-2-sulfonamide 14**

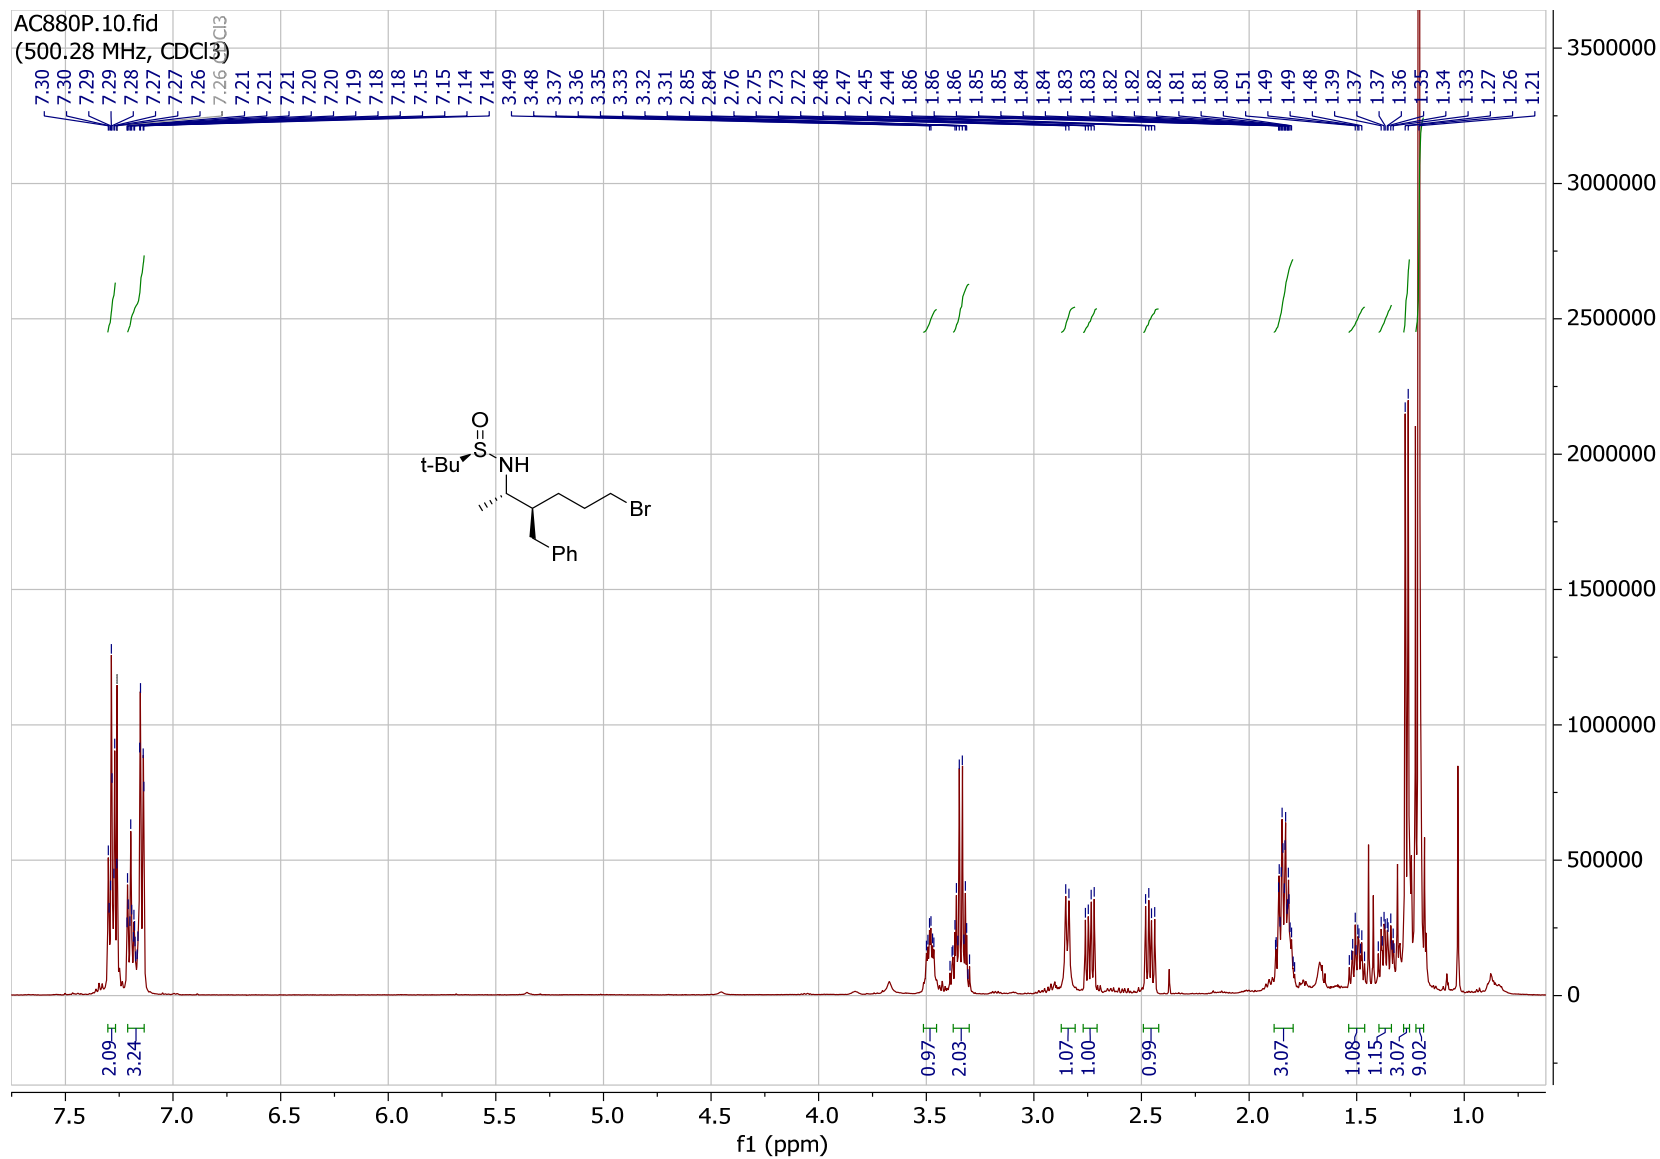

AC880P.11.fid  
(125.81 MHz, CDCl<sub>3</sub>)

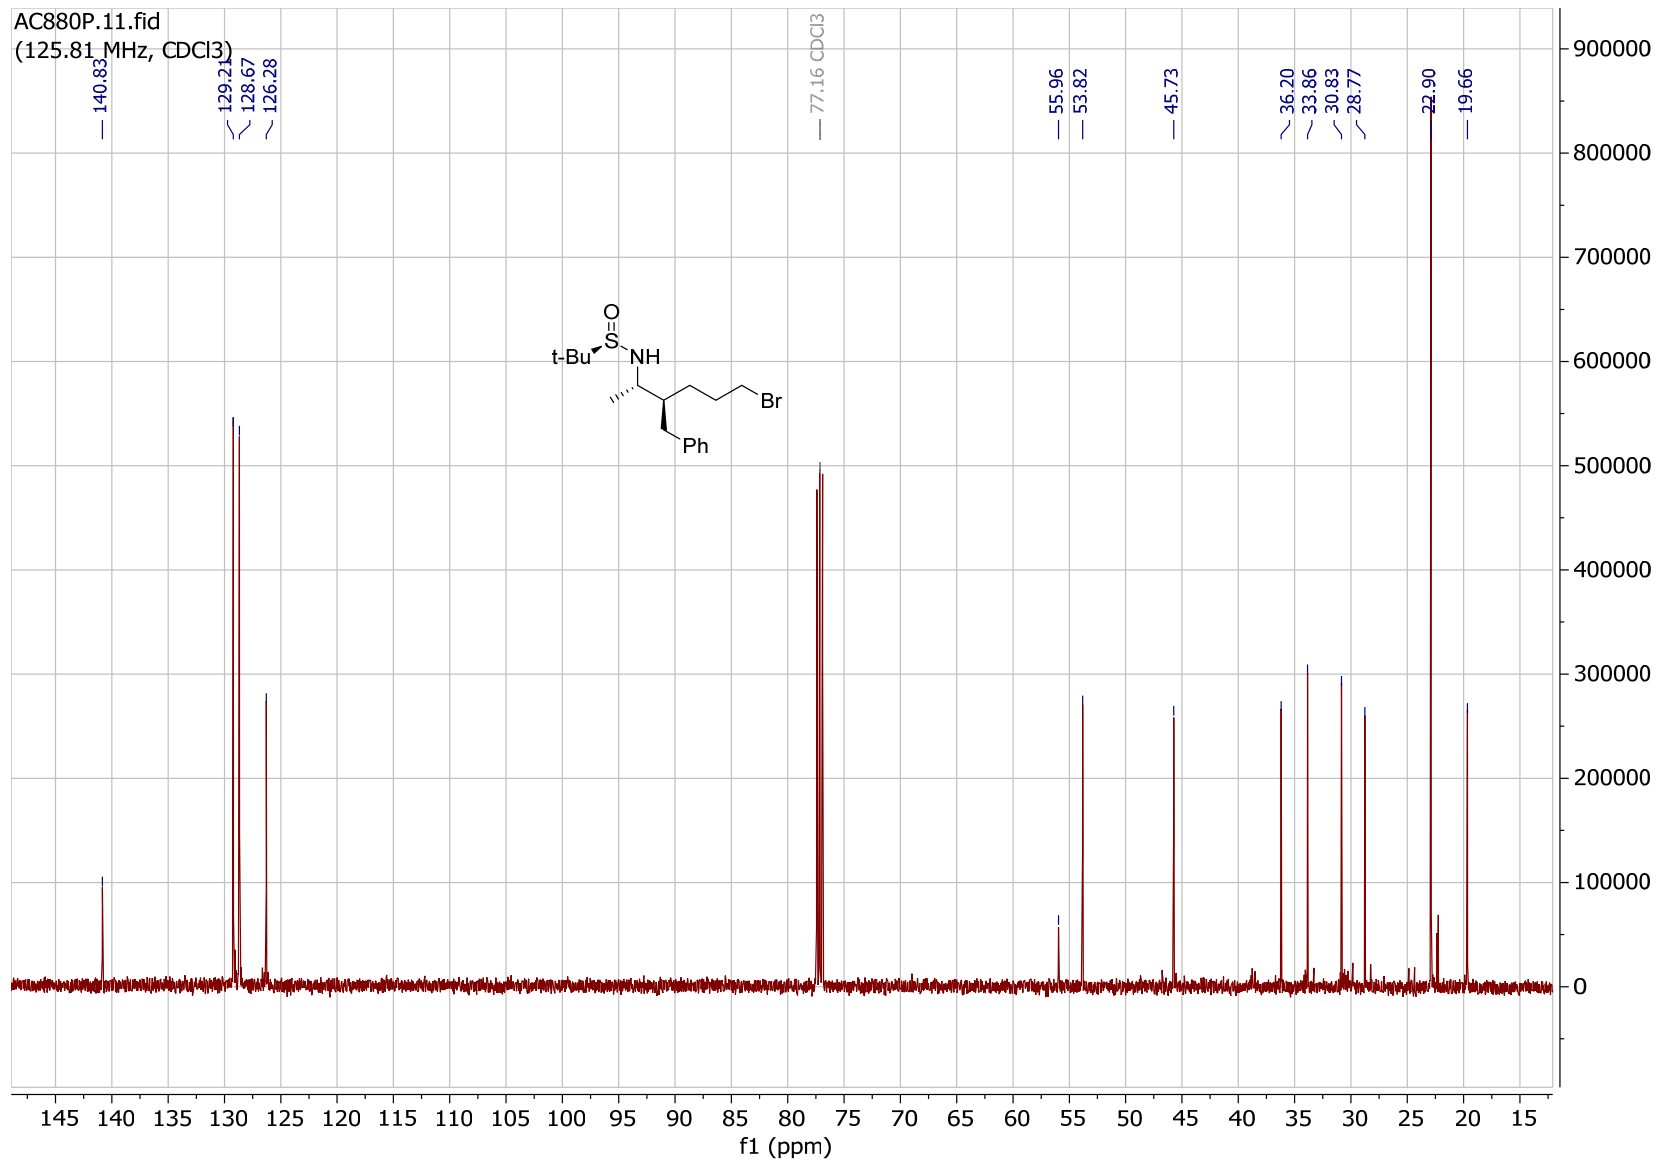

**(2S,3S)-3-Benzyl-1-[(R)-tert-butylsulfinyl]-2-methylpiperidine 15**

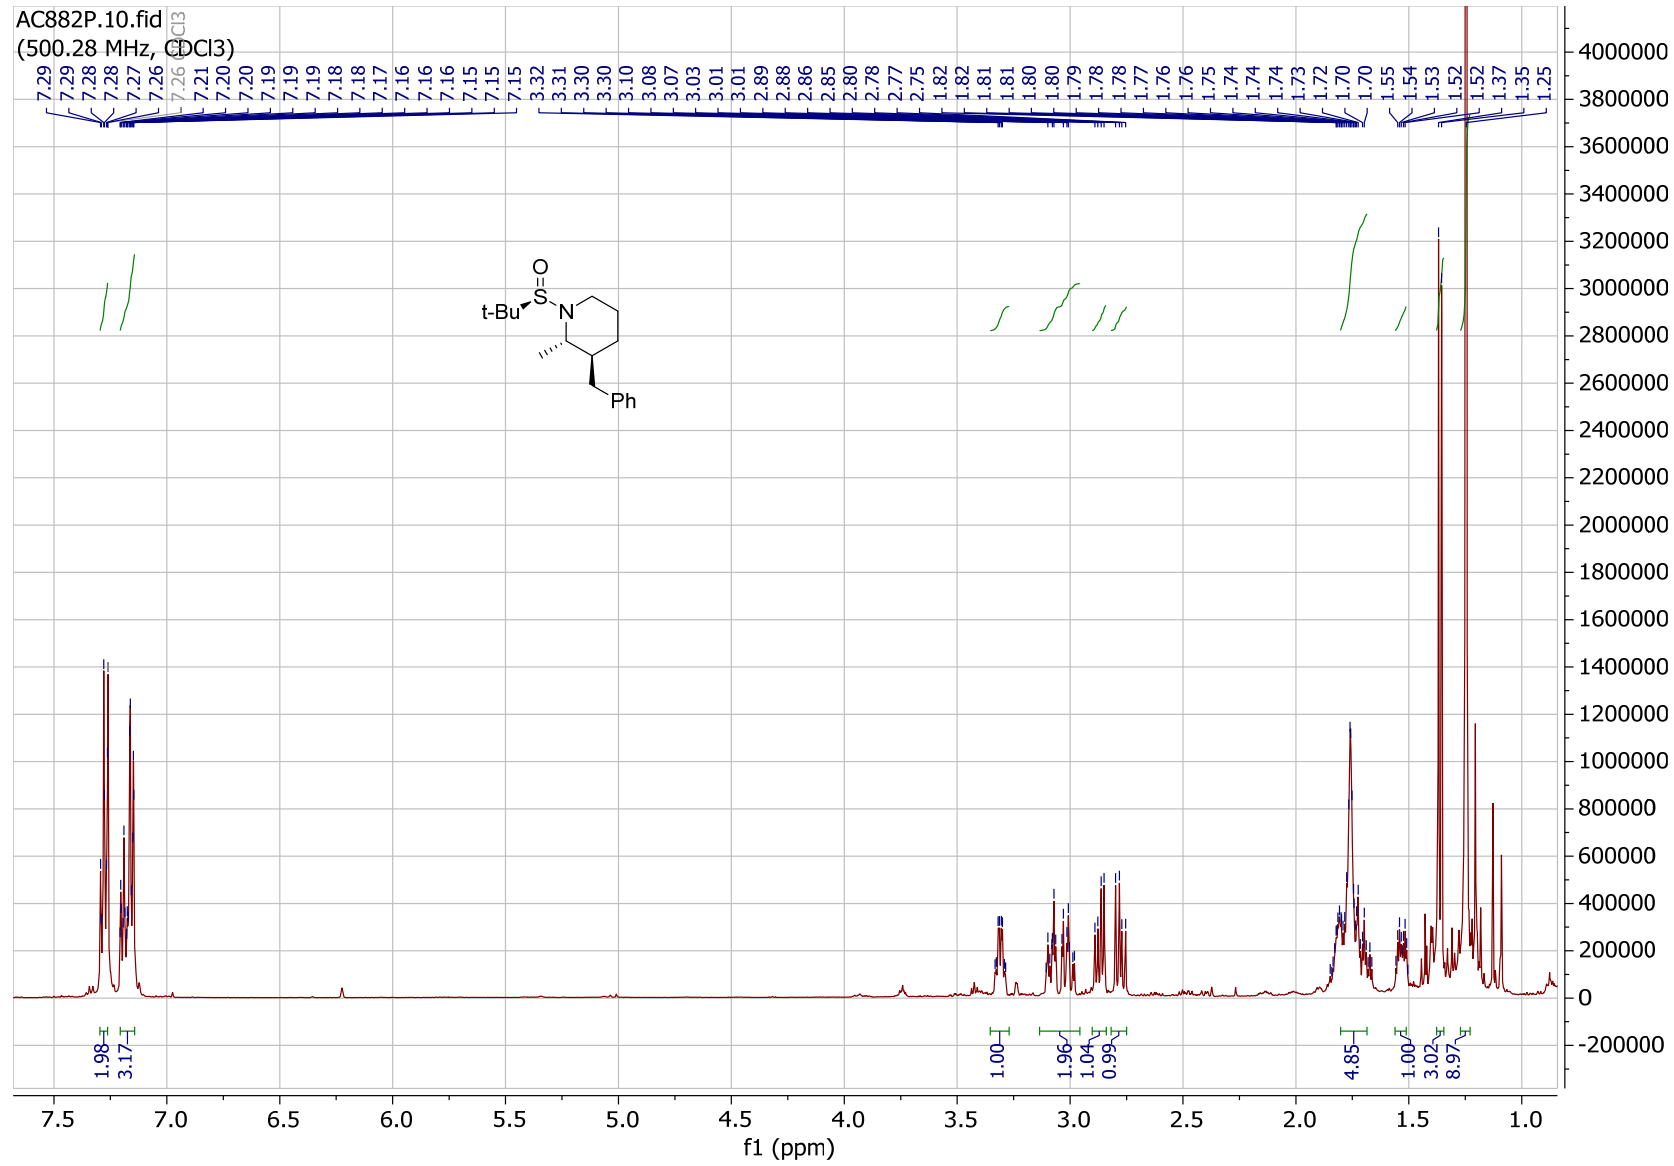

AC882P.11.fid  
(125.81 MHz, CDCl<sub>3</sub>)

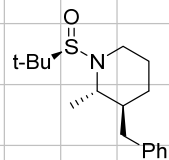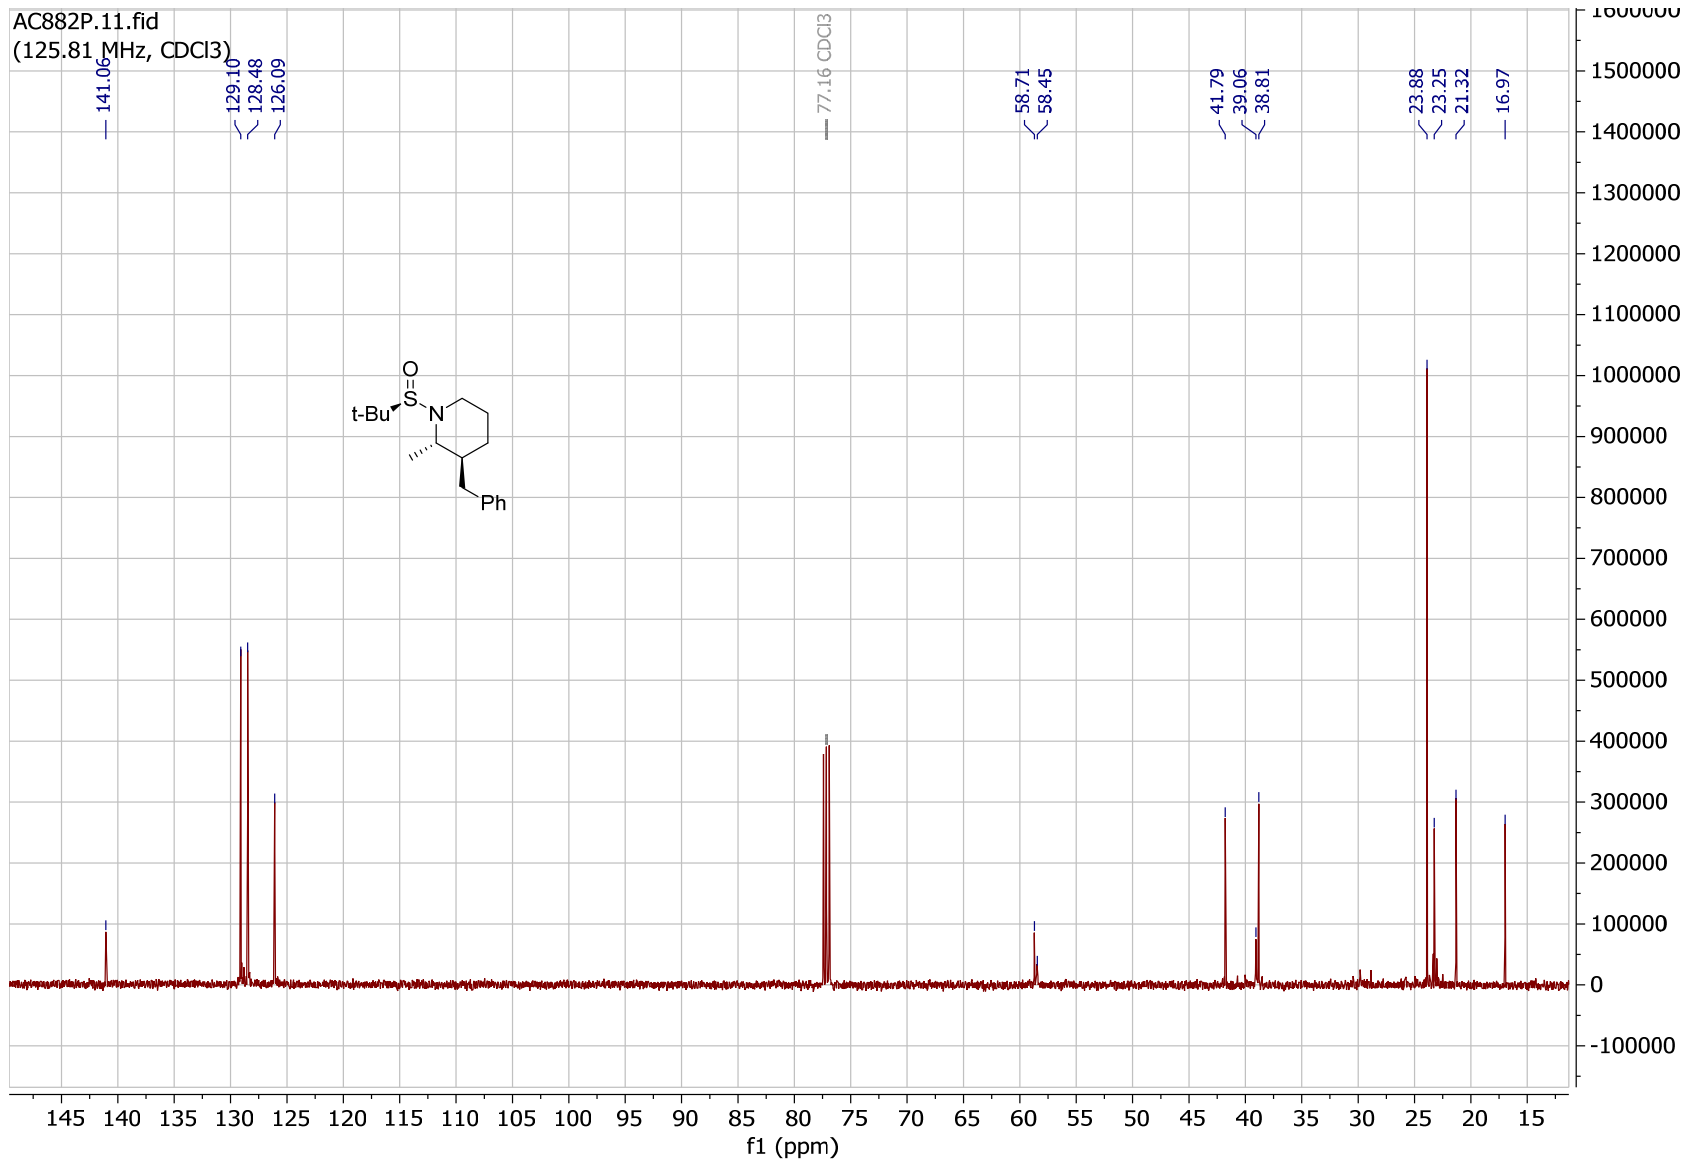

Supplement: d2ob01073a1.pdf [file d2ob01073a1.pdf]
